# Supplementary material for: Machine learning vs. field 3D-QSAR models for serotonin 2A receptor psychoactive substances identification
Source: PubMed Central journal article supplement (PMC8697832; doi:10.1039/d1ra01335a), 2021-04-20
Supplement: RA-011-D1RA01335A-s001.pdf [file RA-011-D1RA01335A-s001.pdf]

## Supporting Information

### **Machine learning vs Field 3D-QSAR models for serotonin 2A receptor psychoactive substances identification**

Giuseppe Floresta <sup>a,\*</sup> and Vincenzo Abbate <sup>a,\*</sup>

<sup>a</sup> Department of Analytical, Environmental and Forensic Sciences, King's College London, London, UK

Corresponding authors:

E-mail address: [giuseppe.floresta@kcl.ac.uk](mailto:giuseppe.floresta@kcl.ac.uk) (G. Floresta), [vincenzo.abbate@kcl.ac.uk](mailto:vincenzo.abbate@kcl.ac.uk) (V. Abbate)

## Table of content

|                                                                                                                                                                                           |      |
|-------------------------------------------------------------------------------------------------------------------------------------------------------------------------------------------|------|
| Statistical analysis information for the model                                                                                                                                            | S3   |
| k-Nearest Neighbors (kNN)                                                                                                                                                                 | S4   |
| Support Vector Machine & Relevance Vector Machine                                                                                                                                         | S4   |
| Random Forest                                                                                                                                                                             | S5   |
| <b>Figure S1.</b> Forge's parameters used for the conformation hunt                                                                                                                       | S6   |
| <b>Figure S2.</b> Forge's parameters used for the alignment                                                                                                                               | S6   |
| <b>Figure S3.</b> Forge's parameters used for the build of the field model                                                                                                                | S7   |
| <b>Figure S4.</b> Forge's parameters used for the build of the kNN model                                                                                                                  | S7   |
| <b>Figure S5.</b> Forge's parameters used for the build of the RF model                                                                                                                   | S7   |
| <b>Figure S6.</b> Forge's parameters used for the build of the RVM model.                                                                                                                 | S8   |
| <b>Figure S7.</b> Forge's parameters used for the build of the SVM model.                                                                                                                 | S8   |
| <b>Figure S8.</b> Model statistics for the 3D-field model.                                                                                                                                | S9   |
| <b>Figure S9.</b> Model statistics for the kNN model.                                                                                                                                     | S9   |
| <b>Figure S10.</b> $q_2$ for kNN model.                                                                                                                                                   | S10  |
| <b>Figure S11.</b> kNN training set experimental vs. calculated $K_i$                                                                                                                     | S10  |
| <b>Figure S12.</b> kNN test set experimental vs. calculated $K_i$                                                                                                                         | S11  |
| <b>Figure S13.</b> RF training set experimental vs. calculated $K_i$                                                                                                                      | S11  |
| <b>Figure S14.</b> RF test set experimental vs. calculated $K_i$                                                                                                                          | S12  |
| <b>Figure S15.</b> RVM training set experimental vs. calculated $K_i$                                                                                                                     | S12  |
| <b>Figure S16.</b> RVM test set experimental vs. calculated $K_i$                                                                                                                         | S13  |
| <b>Figure S17.</b> Pharmit pharmacophore queries for PDB ID: 6a93 (left), 6a94 (centre) and 6wgt (right)                                                                                  | S13  |
| <b>Table S1.</b> SMILES, experimental and predicted (field and SVM) p <i>K</i> <sub>i</sub> values of the molecules in the training set                                                   | S13  |
| <b>Table S2.</b> SMILES, experimental and predicted (field and SVM) p <i>K</i> <sub>i</sub> values of the molecules in the test set                                                       | S20  |
| <b>Table S3.</b> Name of NPS molecules, experimental pEC <sub>50</sub> and predicted (field and SVM) p <i>K</i> <sub>i</sub> values                                                       | S21  |
| <b>Table S4.</b> Calculated $_{\text{field}}\text{p}K_i$ , $_{\text{SVM}}\text{p}K_i$ and $_{\text{mean}}\text{p}K_i$ for the natural products screening                                  | S22  |
| <b>Table S1bis.</b> Structures, experimental and predicted (field and SVM) p <i>K</i> <sub>i</sub> values of the molecules in the training set                                            | S43  |
| <b>Table S2bis.</b> Structures, experimental and predicted (field and SVM) p <i>K</i> <sub>i</sub> values of the molecules in the test set                                                | S103 |
| <b>Table S4bis.</b> Calculated $_{\text{field}}\text{p}K_i$ , $_{\text{SVM}}\text{p}K_i$ and $_{\text{mean}}\text{p}K_i$ for the natural products screening and structures and structures | S120 |

## Statistical analysis information for the models

The following conditions were used to calculate the field 3D-QSAR model (Figure S1-S3). The leave-one-out method was used for the validation of the QSAR model. The maximum number of components to extract from the PLS regression was set to 20. The number of Y scrambles to use was set to 50, this means that in each scramble the activity values are randomly assigned to molecules and the model building process is repeated. More scramble sets provide stronger confirmation of statistical significance. The sample point minimum distance threshold was set to 1 Å. This option checks the sphere exclusion algorithm used to reduce the initial number of field sample positions down to a smaller set. Decrease the value sample point minimum distance increases the number of sample points, which may improve the model at the expense of increasing the probability of over-fitting. A value of 1 Å means that sample points must be at least 1 Å aside from each other. The predictive ability of the generated model was confirmed by different statistical tests. The leave-one-out method was used during the validation of the QSAR model which means that the model is built again but a single molecule left out of the process, this is then repeated leaving out each training set molecule in turn. The predicted activity for each molecule is the value obtained when it was left out of the model building process. The cross-validation regression coefficient ( $q^2$ ) was calculated based on the prediction error sum of squares (PRESS) and the sum of squares of deviation of the experimental values from their mean (SSY):

$$q^2 = 1 - \frac{PRESS}{SSY} = 1 - \frac{\sum_{i=1}^n (Y_{exp} - Y_{pred})^2}{\sum_{i=1}^n (Y_{exp} - Y_{mean})^2}$$

where  $Y_{exp}$  is the experimental activity of training set compound,  $Y_{pred}$  is the predicted activity of training set compound, and  $Y_{mean}$  is the mean values of the activity of training set compound.

The performance of the model was also validated through the determination of the coefficient in prediction,  $r^2_{test}$ , using the following equation:

$$r^2_{test} = 1 - \frac{\sum_{i=1}^n (Y_{predtest} - Y_{test})^2}{\sum_{i=1}^n (Y_{test} - Y_{mean})^2}$$

where  $Y_{predtest}$  is the predicted activity of test set compound by QSAR equation,  $Y_{test}$  is the experimental activity of test set compound, and  $Y_{mean}$  is the mean values of the activity of training set compound.

As an alternative to field QSAR, Forge can use the electrostatic and shape properties of aligned molecules to develop QSAR models using various machine learning methods suitable for regression calculations.

The machine learning methods available in Forge, and used to generate the QSAR models, are k-Nearest Neighbors (kNN), Support Vector Machine, Relevance Vector Machine and Random Forest, all of them are supervised learning methods, i.e. the predictive model is built from training molecules for which we know the activity value or class.





## k-Nearest Neighbors (kNN)

The algorithm works as follows:

1. Calculate the distance (use 1 - similarity) between a new compound and all the compounds in the Training Set;
2. Select k compounds in the Training Set most similar to the new compound, according to the distances calculated in step 1;
3. Regression models: predict the activity of the new compound as the weighted average activity of its k nearest neighbors in the Training Set.

The kNN model was built using the 3D (field and shape) similarity (Figure S4). The use of a 3D (field and shape) similarity metric requires the generation of correct alignments for all compounds with the lowest possible degree of noise. The same alignment used for the field 3D-QSAR model was used for the kNN model.

The optimal k value was selected by LOO (Leave-One-Out) cross-validation: each compound in the Training Set was removed in turn from the modelling and its activity was predicted as the average activity of its k nearest neighbors. These Training Set predicted activities are used to calculate a q<sup>2</sup> value for the model (Figure S9 and S10). The k value and weighting scheme which gives the highest q<sup>2</sup> were then selected as the optimal conditions for the kNN model (Figure S11 and S12).

## Support Vector Machine & Relevance Vector Machine

In this method, the 3D descriptors for the Training Set molecules are plotted as points in *n*-dimensional space, where *n* is the number of the descriptors. In binary classification, the aim is to find the (*n*-1)-dimensional hyperplane in this space that best separates the two classes, by maximising the distances to the nearest points. The subset of data points that define this margin are termed *support vectors*. New molecules from a test or prediction set are then mapped into the same space and classified according to which side of the hyperplane they fall. If the data points cannot be separated linearly, a transformation can be applied to the points so that they can be represented in a higher dimensional space, in which they may be separable. This is known as the *kernel trick* and the functions that perform this operation are known as *kernels*. In Forge, the radial basis function (RBF) kernel is used, as this works well for a wide range of data, is relatively easy to optimise as it has only one hyperparameter and is numerically well-behaved.

SVM regression models (Figure S7)

1. The gamma parameter for the RBF kernel, determines how far the influence of a single training example reaches. Lower values of gamma increase the distance away from the hyperplane at which data points are considered. Higher gamma values allow more complex models at the risk of overfitting.
2. C is a regularisation parameter which controls accuracy vs. generalization. Higher values of C give a more accurate fit to the training data, with a higher likelihood of overfitting. Lower values of C result in a simpler decision boundary that may generalise better to unseen data.
3. The epsilon parameter specifies the tolerance to which the hyperplane is optimised, i.e. how closely the model should attempt to reproduce the data. lower epsilon values lead to a more closely fitted model, but higher susceptibility to noise.

Care was taken to avoid over/underfitting to the training data in selecting these parameters. An effective way to choose the gamma, C and epsilon parameters is through a k-fold cross-validation procedure, where the cross-validation process is repeated k times, each time leaving out 20% of the Training Set compounds. The cross-validation was carried out for various values of these parameters, which were chosen through a global

optimisation procedure, and the final model was built from the parameters which gave the best predictive power during cross-validation, as measured by the Root Mean Squared error from cross-validation.

Relevance Vector Machines (RVMs, Figure S6) have the same functional form as SVMs, but the training process uses Bayesian inference to estimate the parameters for the model. This therefore eliminates the complex process of choosing model parameters such as C and epsilon, although the RBF gamma parameter must still be chosen through a k-fold cross-validation procedure. The quality of the model is then evaluated by how accurate the predictions are. For regression problems, the parameter optimization continues until convergence.

## **Random Forest**

Random Forest (Figure S5) is a regression method based upon decision trees.

To fit the regression problem using a decision tree, several splits were tried for the data for the selected 3D descriptors, and the split that gives the lowest error for the predicted activity value was chosen. This splitting process was continued recursively until the maximum tree depth was reached.

Random forests improve on decision trees by using an ensemble of decision trees, trained with bagging (bootstrap aggregating). Bagging means that each tree is built from a random sample of the original descriptors, which may include duplicate descriptors. The output for a prediction is then the mean prediction from all of the trees in the forest. The Random Forest procedure enhances stability and accuracy relative to using a decision tree and helps to avoid overfitting.

The following parameters were to train Random Forest model:

1. Number of trees. Generally, more trees will result in more accurate predictions.
2. Feature subsampling fraction. To introduce additional randomness, only a randomly selected fraction of the descriptors is considered at each split in the tree.
3. Minimum samples per leaf: defines the minimum node size, which implicitly limits the tree depth, reducing the risk of overfitting.

Conformation Hunt   Alignment   Build Model

Calculation Method: [Custom]   Save As...   Delete

Delete existing conformations

Perform Conformation Hunt

Maximum number of conformations: 500

No. of high-T dynamics runs for flexible rings: 20

Gradient cutoff for conformer minimization: 0,100 kcal/mol/Å

Filter duplicate conformers at RMS: 0,50 Å

Energy window: 2,50 kcal/mol

Acyclic secondary amide handling: Use input amide geometry

Turn off Coulombic and attractive vdW forces:

Use external tool for conformation generation:

**Figure S1.** Forge's parameters used for the conformation hunt.

Conformation Hunt   Alignment   Build Model

Calculation Method: Normal   Save As...   Delete

Delete existing alignments

Perform Alignment

Invert achiral imported confs:

Take shortcuts in alignments:

Maximum-common-substructure conformers and alignment

Matching rules: Normal (element + hybridisation)

Allow conformations to move:

Perform Scoring

Score method for multiple references: Weighted Average

Fraction of score from shape similarity: 0.50

Reference into db fieldpoints weight: 0.50

Hardness of protein excluded volume: Soft

Add/remove field constraints: Mark field points

**Figure S2.** Forge's parameters used for the alignment.

Conformation Hunt Alignment Build Model

Calculation Method: Field QSAR Normal Save As... Delete

Activity:  Ki nM Activity Manager

Field QSAR model

Maximum number of components 20

Sample point minimum distance 1.0 A

Generate samples from references

Number of Y scrambles 50

Fields to use  Electrostatic  Volume

Weight molecules by similarity

Weight ramp type Linear

Minimum similarity 0.00

Maximum similarity 1.00

Cross-validation

Cross-validation type Leave-one-out

Training set to use as validation data 20%

Repeats 1000

**Figure S3.** Forge's parameters used for the build of the field model.

Conformation Hunt Alignment Build Model

Calculation Method: Regression Models

k-Nearest Neighbor (kNN) Save As... Delete

Activity:  Ki nM Activity Manager

k-Nearest Neighbor (kNN) QSAR model

Maximum number of neighbours (k) 20

Similarity Type Field

Fraction of similarity from shape 0.50

Optimize pairwise alignments

Weighting scheme Automatic

**Figure S4.** Forge's parameters used for the build of the kNN model.

Conformation Hunt Alignment Build Model

Calculation Method: Regression Models

Random Forest Save As... Delete

Activity:  Ki nM Activity Manager

Random forest regression model

Sample point minimum distance 1.0 A

Fields to use  Electrostatic  Volume

Parameters

Number of trees 1000

Feature subsampling fraction 0.33

Minimum samples per leaf 5

**Figure S5.** Forge's parameters used for the build of the RF model.

Calculation Method: Regression Models  
 RVM  
 Save As... Delete

Activity:  Ki nM  
 Activity Manager

Relevance vector machine regression model

Sample point minimum distance 1.0 A

Fields to use  Electrostatic  Volume

Parameters

Number of folds in k-fold cross-validation 5

Global parameter optimization

Maximum no. optimizer iterations 50

Time limit for global optimization 3600s

Gamma range between 1.0e-05 and 1.0e-01 OK

**Figure S6.** Forge's parameters used for the build of the RVM model.

Conformation Hunt Alignment Build Model

Calculation Method: Regression Models  
 SVM  
 Save As... Delete

Activity:  Ki nM  
 Activity Manager

Support vector machine regression model

Sample point minimum distance 1.0 A

Fields to use  Electrostatic  Volume

Parameters

Number of folds in k-fold cross-validation 5

Global parameter optimization

Maximum no. optimizer iterations 50

Time limit for global optimization 3600s

Gamma range between 1.0e-05 and 1.0e-01 OK

C range between 1.0e-01 and 1.0e+03 OK

Epsilon range between 1.0e-04 and 1.0e+00 OK

**Figure S7.** Forge's parameters used for the build of the SVM model.

| Comps | R^2    | Q^2    | Test R^2 | RMSE  | RMSEpred | Tau   | Tau-pred |
|-------|--------|--------|----------|-------|----------|-------|----------|
| 0     | -0.001 | -0.007 | -0.001   | 1.071 | 1.074    | 0.306 | -0.963   |
| 1     | 0.511  | 0.448  | 0.398    | 0.750 | 0.798    | 0.514 | 0.474    |
| 2     | 0.721  | 0.644  | 0.653    | 0.563 | 0.639    | 0.647 | 0.590    |
| 3     | 0.794  | 0.721  | 0.678    | 0.485 | 0.565    | 0.705 | 0.647    |
| 4     | 0.847  | 0.744  | 0.695    | 0.417 | 0.542    | 0.751 | 0.667    |
| 5*    | 0.878  | 0.751  | 0.734    | 0.372 | 0.535    | 0.779 | 0.670    |
| 6     | 0.909  | 0.746  | 0.702    | 0.319 | 0.540    | 0.808 | 0.665    |
| 7     | 0.939  | 0.742  | 0.715    | 0.260 | 0.544    | 0.851 | 0.669    |
| 8     | 0.948  | 0.738  | 0.703    | 0.241 | 0.548    | 0.865 | 0.664    |
| 9     | 0.960  | 0.734  | 0.684    | 0.212 | 0.553    | 0.877 | 0.664    |
| 10    | 0.967  | 0.730  | 0.670    | 0.192 | 0.557    | 0.887 | 0.663    |
| 11    | 0.974  | 0.726  | 0.675    | 0.171 | 0.560    | 0.899 | 0.661    |
| 12    | 0.980  | 0.719  | 0.666    | 0.147 | 0.568    | 0.911 | 0.656    |
| 13    | 0.986  | 0.708  | 0.668    | 0.126 | 0.579    | 0.927 | 0.649    |
| 14    | 0.989  | 0.702  | 0.665    | 0.110 | 0.586    | 0.935 | 0.644    |
| 15    | 0.992  | 0.699  | 0.653    | 0.097 | 0.588    | 0.944 | 0.642    |
| 16    | 0.993  | 0.696  | 0.655    | 0.086 | 0.592    | 0.951 | 0.637    |
| 17    | 0.995  | 0.693  | 0.649    | 0.074 | 0.595    | 0.957 | 0.635    |
| 18    | 0.996  | 0.691  | 0.650    | 0.065 | 0.597    | 0.961 | 0.635    |
| 19    | 0.997  | 0.691  | 0.652    | 0.056 | 0.597    | 0.969 | 0.633    |
| 20    | 0.998  | 0.691  | 0.642    | 0.049 | 0.597    | 0.973 | 0.634    |

**Figure S8.** Model statistics for the 3D-field model.

Model statistics:  
 =====

| K  | Distance |           | Q^2    | RMSEpred | Tau-pred |
|----|----------|-----------|--------|----------|----------|
|    | Avg      | Std. dev. |        |          |          |
| 0  | 0.00     | 1.00      | -0.007 | 1.075    | -0.991   |
| 1  | 0.28     | 0.09      | 0.485  | 0.769    | 0.557    |
| 2  | 0.29     | 0.09      | 0.635  | 0.647    | 0.597    |
| 3* | 0.31     | 0.08      | 0.661  | 0.624    | 0.611    |
| 4  | 0.32     | 0.08      | 0.660  | 0.625    | 0.608    |
| 5  | 0.32     | 0.08      | 0.668  | 0.617    | 0.610    |
| 6  | 0.33     | 0.07      | 0.656  | 0.629    | 0.605    |
| 7  | 0.34     | 0.07      | 0.656  | 0.628    | 0.600    |
| 8  | 0.34     | 0.07      | 0.651  | 0.633    | 0.597    |
| 9  | 0.35     | 0.07      | 0.650  | 0.634    | 0.598    |
| 10 | 0.35     | 0.07      | 0.652  | 0.632    | 0.595    |
| 11 | 0.35     | 0.07      | 0.645  | 0.638    | 0.591    |
| 12 | 0.36     | 0.06      | 0.644  | 0.639    | 0.590    |
| 13 | 0.36     | 0.06      | 0.638  | 0.645    | 0.585    |
| 14 | 0.37     | 0.06      | 0.634  | 0.648    | 0.583    |
| 15 | 0.37     | 0.06      | 0.632  | 0.650    | 0.586    |
| 16 | 0.37     | 0.06      | 0.630  | 0.652    | 0.582    |
| 17 | 0.37     | 0.06      | 0.628  | 0.653    | 0.580    |
| 18 | 0.38     | 0.05      | 0.625  | 0.656    | 0.580    |
| 19 | 0.38     | 0.05      | 0.623  | 0.658    | 0.579    |
| 20 | 0.38     | 0.05      | 0.615  | 0.664    | 0.574    |

Best value of K: 3

**Figure S9.** Model statistics for the kNN model.

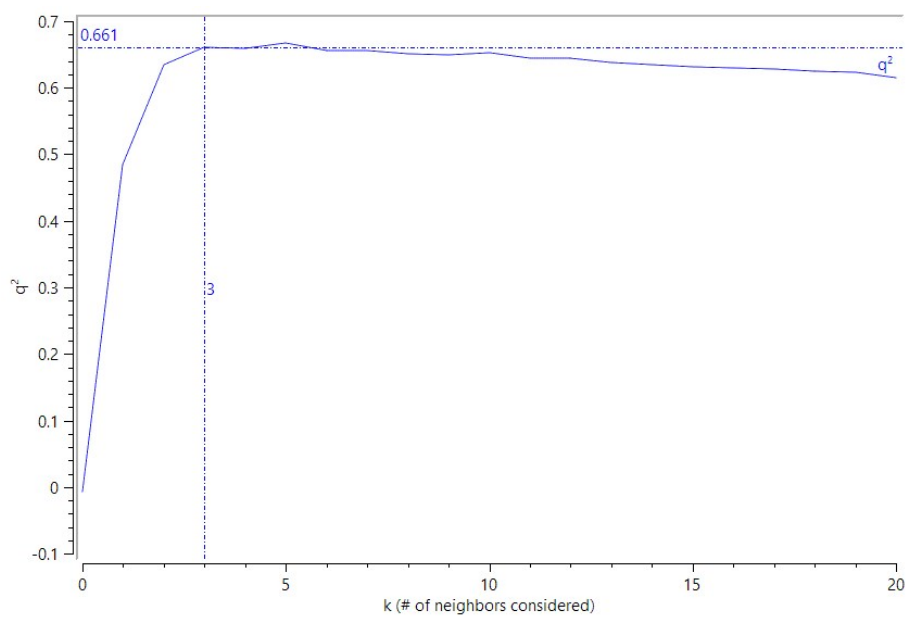

**Figure S10.**  $q^2$  for kNN model.

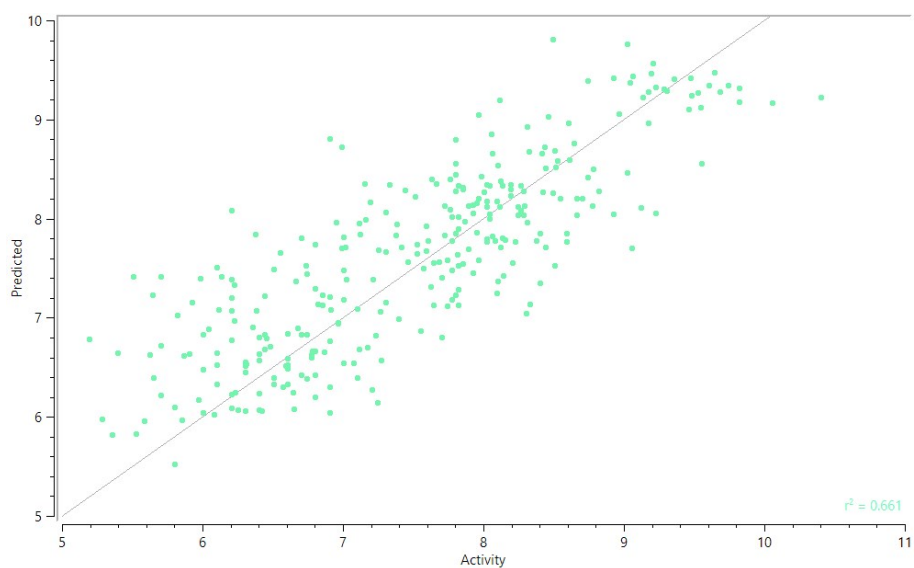

**Figure S11.** kNN training set experimental vs. calculated  $K_i$

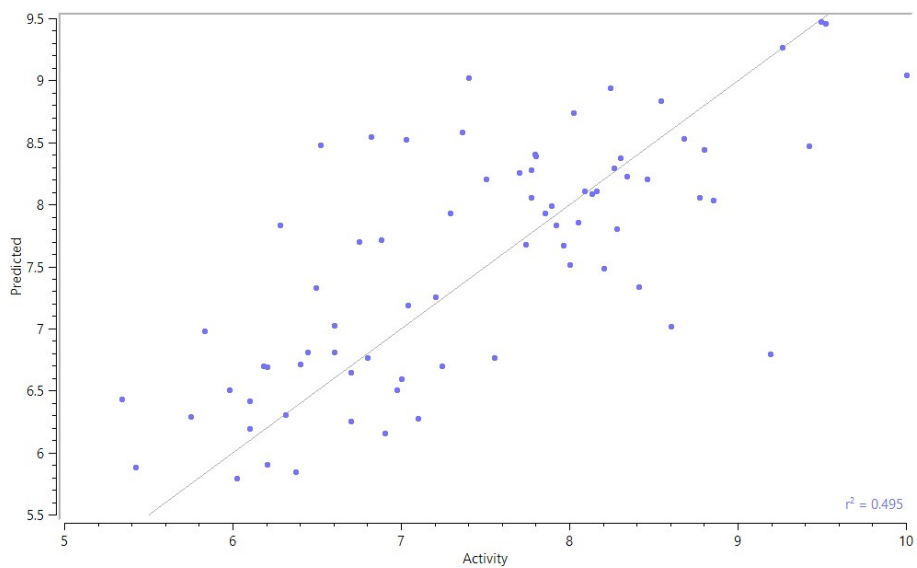

**Figure S12.** kNN test set experimental vs. calculated  $K_i$

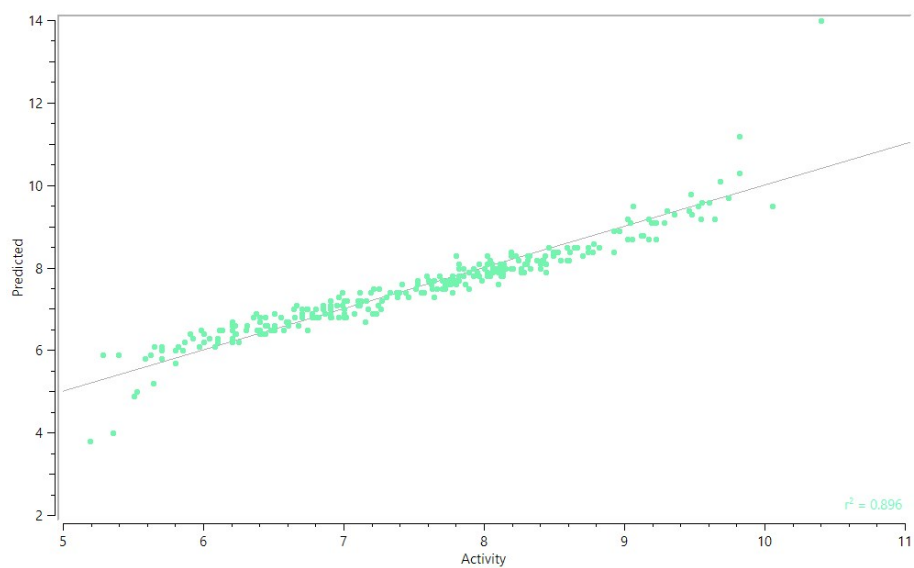

**Figure S13.** RF training set experimental vs. calculated  $K_i$



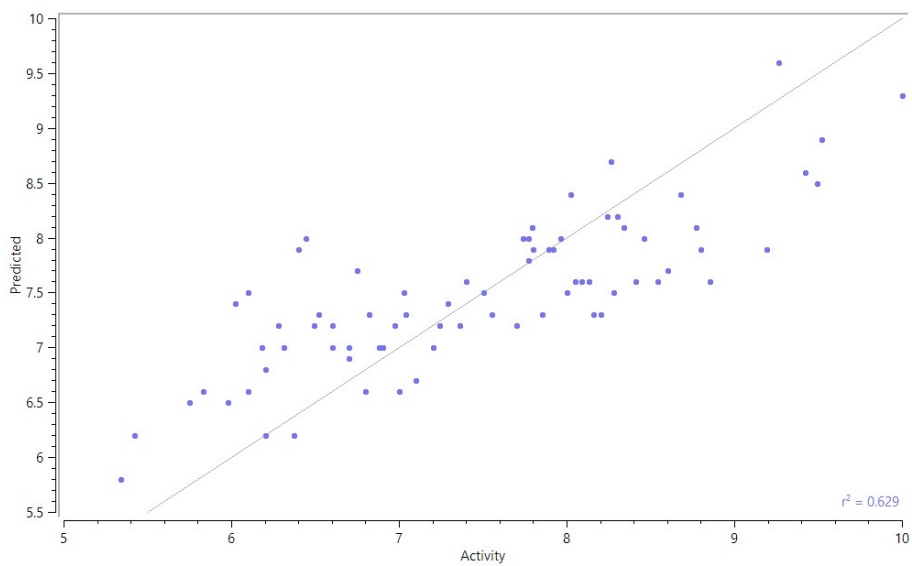

**Figure S14.** RF test set experimental vs. calculated  $K_i$

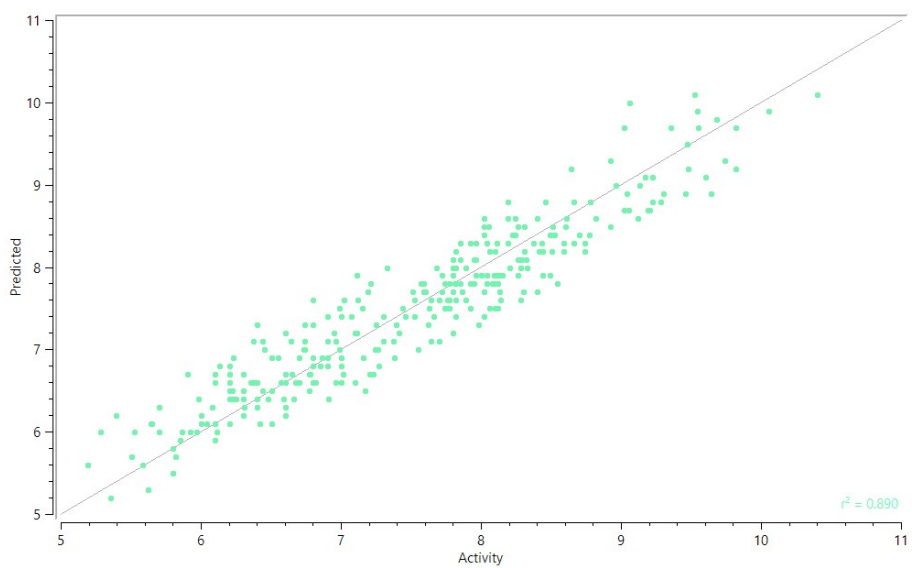

**Figure S15.** RVM training set experimental vs. calculated  $K_i$

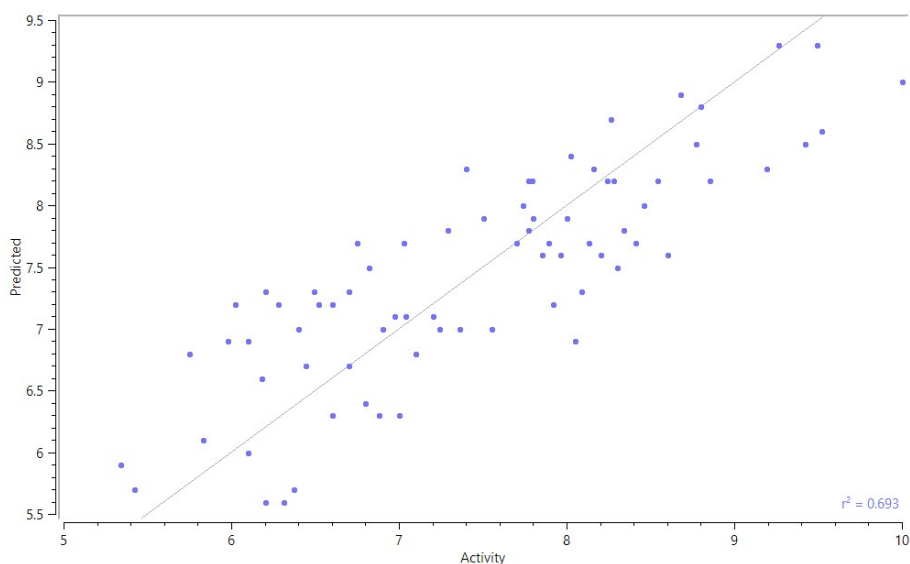

**Figure S16.** RVM test set experimental vs. calculated  $K_i$

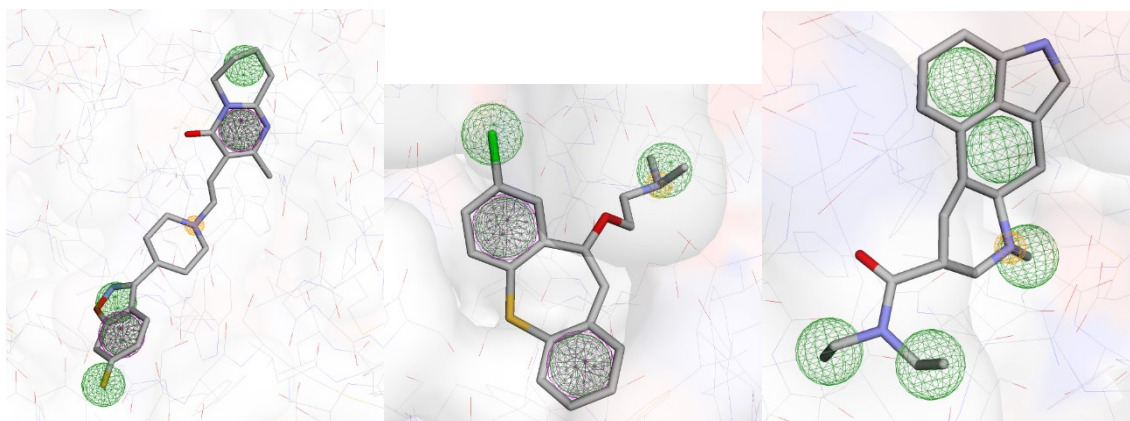

**Figure S17.** Pharmit pharmacophore queries for PDB ID: 6a93 (left), 6a94 (centre) and 6wtg (right).

**Table S1.** SMILES, experimental and predicted (field and SVM)  $pK_i$  values of the molecules in the training set

| n | SMILES                                                                       | exp $pK_i$ | field $pK_i$ | SVM $pK_i$ |
|---|------------------------------------------------------------------------------|------------|--------------|------------|
| 1 | <chem>O=C(N[C@H]1CCc2ccc(CC[NH+]3CCN(CC3)c4c5ccccc5sn4)cc21)Cc6ccccc6</chem> | 10.4       | 10.4         | 10.4       |
| 2 | <chem>[NH3+][C@@H]1c2cc(CC[NH+]3CCN(CC3)c4c5ccccc5sn4)ccc2CC1</chem>         | 10.1       | 9.8          | 10.0       |
| 3 | <chem>FC(F)(F)C(=O)N[C@H]1CCc2cc(CC[NH+]3CCN(CC3)c4c5ccccc5sn4)ccc21</chem>  | 9.8        | 9.5          | 9.8        |
| 4 | <chem>O=C(NC1CCC(CC[NH+]2CCN(CC2)c3c4ccccc4sn3)CC1)c5ccccc5</chem>           | 9.8        | 9.4          | 9.8        |
| 5 | <chem>O=C(OCC)NC1CCC(CC[NH+]2CCN(CC2)c3c4ccccc4sn3)CC1</chem>                | 9.7        | 9.4          | 9.6        |
| 6 | <chem>O=C(NC1CCC(CC[NH+]2CCN(CC2)c3c4ccccc4sn3)CC1)Nc5ccccc5</chem>          | 9.7        | 10.0         | 9.7        |
| 7 | <chem>O=C(NC1CCC(CC[NH+]2CCN(CC2)c3c4ccccc4sn3)CC1)c5ccccc5</chem>           | 9.6        | 9.0          | 9.3        |

|    |                                                                                  |     |      |     |
|----|----------------------------------------------------------------------------------|-----|------|-----|
| 8  | <chem>O=C(N[C@H]1CCc2cc(CC[NH+]3CCN(CC3)c4c5ccccc5sn4)ccc21)CC</chem>            | 9.6 | 9.2  | 9.6 |
| 9  | <chem>Fe1ccc(C(=O)C2CC[NH+](CC2)CCN3C(=O)Nc4ccccc4C3=O)cc1</chem>                | 9.6 | 9.7  | 9.5 |
| 10 | <chem>O=C(NC1CCC(CC[NH+]2CCN(CC2)c3c4ccccc4sn3)CC1)c5cnccc5</chem>               | 9.5 | 9.6  | 9.5 |
| 11 | <chem>O=C(N[C@H]1CCc2ccc(CC[NH+]3CCN(CC3)c4c5ccccc5sn4)cc21)C6CC6</chem>         | 9.5 | 10.2 | 9.5 |
| 12 | <chem>O=C(N[C@H]1CCc2cc(CC[NH+]3CCN(CC3)c4c5ccccc5sn4)ccc21)C</chem>             | 9.5 | 9.0  | 9.5 |
| 13 | <chem>O=S(=O)(NC1CCC(CC1)CC[NH+]2CCN(CC2)c3c4ccccc4sn3)CCC</chem>                | 9.5 | 10.0 | 9.5 |
| 14 | <chem>O=C(NC1CCC(CC[NH+]2CCN(CC2)c3c4ccccc4sn3)CC1)C5CC5</chem>                  | 9.5 | 9.2  | 9.5 |
| 15 | <chem>O=C(N[C@H]1CCc2ccc(CC[NH+]3CCN(CC3)c4c5ccccc5sn4)cc21)CCC</chem>           | 9.4 | 10.0 | 9.4 |
| 16 | <chem>O=C(NC1CCC(CC1)CC[NH+]2CCN(CC2)c3c4ccccc4sn3)N(CC)C</chem>                 | 9.3 | 9.1  | 9.3 |
| 17 | <chem>O=C(OCC)NC1CCC(CC[NH+]2CCN(CC2)c3c4ccccc4sn3)CC1</chem>                    | 9.3 | 8.8  | 9.2 |
| 18 | <chem>O=C(NC1CCC(CC1)CC[NH+]2CCN(CC2)c3c4ccccc4sn3)N(C)C</chem>                  | 9.2 | 9.2  | 9.2 |
| 19 | <chem>Fe1ccc2c(oc2C3CC[NH+](CC3)CCCCNS(=O)(=O)c4ccccc5ccccc54)c1</chem>          | 9.2 | 9.0  | 9.2 |
| 20 | <chem>FC(F)(F)C(=O)NC1CCC(CC[NH+]2CCN(CC2)c3c4ccccc4sn3)CC1</chem>               | 9.2 | 8.8  | 9.2 |
| 21 | <chem>O=C(N[C@H]1CCc2cc(CC[NH+]3CCN(CC3)c4c5ccccc5sn4)ccc21)C(C)C</chem>         | 9.2 | 8.6  | 9.2 |
| 22 | <chem>FC1(S(=O)(=O)c2ccccc2)CC[NH+](CC1)CCc3ccc(F)cc3F</chem>                    | 9.2 | 8.6  | 8.9 |
| 23 | <chem>O=C(N[C@H]1CCc2cc(CC[NH+]3CCN(CC3)c4c5ccccc5sn4)ccc21)c6cnccc6</chem>      | 9.2 | 9.2  | 9.2 |
| 24 | <chem>Fe1ccc(C(=O)CCC[NH+]2CC=C(N3C(=O)Nc4ccccc43)CC2)cc1</chem>                 | 9.1 | 9.3  | 9.1 |
| 25 | <chem>O=C(N[C@H]1CCc2ccc(CC[NH+]3CCN(CC3)c4c5ccccc5sn4)cc21)C(C)C</chem>         | 9.1 | 8.7  | 9.1 |
| 26 | <chem>O=C(NC1CCC(CC[NH+]2CCN(CC2)c3c4ccccc4sn3)CC1)CCC</chem>                    | 9.1 | 9.5  | 9.2 |
| 27 | <chem>O=S(=O)(NCC[NH+]1CCN(CC1)c2c3ccccc3sn2)c4ccc5ccccc5c4</chem>               | 9.1 | 8.9  | 9.0 |
| 28 | <chem>O=C(NC1CCC(CC[NH+]2CCN(CC2)c3c4ccccc4sn3)CC1)NCc5ccccc5</chem>             | 9.0 | 9.2  | 9.0 |
| 29 | <chem>O=C(N[C@H]1CCc2ccc(CC[NH+]3CCN(CC3)c4c5ccccc5sn4)cc21)c6cnccc6</chem>      | 9.0 | 8.7  | 9.0 |
| 30 | <chem>O=C(N[C@H]1CCc2ccc(CC[NH+]3CCN(CC3)c4c5ccccc5sn4)cc21)CCc6ccccc6</chem>    | 9.0 | 9.6  | 9.0 |
| 31 | <chem>O=C(NC1CCC(CC[NH+]2CCN(CC2)c3c4ccccc4sn3)CC1)CC</chem>                     | 9.0 | 9.0  | 9.0 |
| 32 | <chem>O=S(=O)(NC1CCC(CC1)CC[NH+]2CCN(CC2)c3c4ccccc4sn3)C)c5cccs5</chem>          | 8.9 | 9.6  | 8.9 |
| 33 | <chem>Fe1ccc(C(=O)CCC[NH+]2CCC(n3c(O)nc4ccccc43)CC2)cc1</chem>                   | 8.9 | 8.4  | 8.9 |
| 34 | <chem>Clc1cccc(N2CC[NH+](CCCCOc3ccc4c(NC(=O)CC4)n3)CC2)c1C</chem>                | 8.8 | 8.6  | 8.8 |
| 35 | <chem>Fe1ccc(C(=O)N[C@H]2CCc3cc(CC[NH+]4CCN(CC4)c5c6ccccc6sn5)ccc32)cc1</chem>   | 8.8 | 8.7  | 8.8 |
| 36 | <chem>Fe1ccc2c(oc2C3CC[NH+](CC3)CCCNS(=O)(=O)c4ccccc5ccccc54)c1</chem>           | 8.8 | 8.1  | 8.8 |
| 37 | <chem>Fe1ccc2c(oc2C3CC[NH+](CC3)CCNS(=O)(=O)c4ccc5ccccc5c4)c1</chem>             | 8.7 | 8.2  | 8.7 |
| 38 | <chem>O=C(NC1CCC(CC[NH+]2CCN(CC2)c3c4ccc([N+](=[O-])=O)cc4sn3)CC1)c5ccco5</chem> | 8.7 | 8.5  | 8.7 |
| 39 | <chem>Clc1c(Cl)cccc1N2CC[NH+](CCC2)CCCCOc3ccc4c(NC(=O)CC4)c3</chem>              | 8.7 | 8.5  | 8.7 |
| 40 | <chem>O=C(N1CCC(CC[NH+]2CCN(CC2)c3c4ccccc4sn3)CC1)c5ccco5</chem>                 | 8.7 | 8.5  | 8.7 |
| 41 | <chem>FC(F)(F)Oc1ccc(S(=O)(=O)NCCCC[NH+]2CCN(CC2)c3c4ccccc4sn3)cc1</chem>        | 8.7 | 8.9  | 8.7 |
| 42 | <chem>Fe1ccc2c(c(c(S(=O)(=O)NCCCC[NH+]3CCC(CC3)c4c5ccc(F)cc5on4)s2)C)c1</chem>   | 8.6 | 9.2  | 8.6 |
| 43 | <chem>Fe1ccc(C(=O)N[C@H]2CCc3ccc(CC[NH+]4CCN(CC4)c5c6ccccc6sn5)cc32)cc1</chem>   | 8.6 | 8.5  | 8.6 |
| 44 | <chem>O[C@H](C1CC[NH+](CC1)CCc2ccccc2)c3ccccc3</chem>                            | 8.6 | 8.4  | 8.6 |
| 45 | <chem>Clc1ccc2c(sc(S(=O)(=O)NCCCC[NH+]3CCC(CC3)c4c5ccc(F)cc5on4)c2)c1</chem>     | 8.6 | 8.5  | 8.6 |
| 46 | <chem>Clc1c(Cl)cccc1N2CC[NH+](CC2)CCCC(=O)Nc3ccn4c(c(cn4)/C=N\O)c3</chem>        | 8.6 | 8.7  | 8.6 |
| 47 | <chem>Fe1ccc(C(=O)CCC[NH+]2CC[C@H]3[C@H](C2)c4ccccc5CCN3c54)cc1</chem>           | 8.5 | 7.7  | 8.1 |
| 48 | <chem>O=C(N[C@H]1CCc2ccc(CC[NH+]3CCN(CC3)c4c5ccccc5sn4)cc21)c6ccc(C)cc6</chem>   | 8.5 | 8.3  | 8.5 |
| 49 | <chem>Clc1ccc2c(ccc(S(=O)(=O)NCCCC[NH+]3CCC(CC3)c4c5ccc(F)cc5on4)c2)c1</chem>    | 8.5 | 8.7  | 8.5 |
| 50 | <chem>O=C1c2cc(OCCC[NH+]3CCN(CC3)c4ccccc5CCc54)ccc2CN1</chem>                    | 8.5 | 8.2  | 8.5 |
| 51 | <chem>Fe1ccc(OCCC[NH+]2CCC(N3C(=O)Nc4ccccc43)CC2)cc1</chem>                      | 8.5 | 8.3  | 8.5 |
| 52 | <chem>O=C(N1CCOCC1)NC2CCC(CC2)CC[NH+]3CCN(CC3)c4c5ccccc5sn4</chem>               | 8.5 | 8.5  | 8.5 |
| 53 | <chem>Clc1c(Cl)cccc1N2CC[NH+](CC2)CCCCOc3nccc4C=CC(=O)Nc4n3</chem>               | 8.5 | 8.1  | 8.5 |
| 54 | <chem>Fe1ccc2c(oc2C3CC[NH+](CCNS(=O)(=O)c4ccccc4)C)CC3)c1</chem>                 | 8.5 | 8.8  | 8.5 |
| 55 | <chem>Fe1ccccc1S(=O)(=O)c2cnc(cc2)/C=C/c3ccccc3O</chem>                          | 8.4 | 8.2  | 8.4 |
| 56 | <chem>Fe1ccc2c(oc2C3CC[NH+](CC3)CCCCNS(=O)(=O)c4ccc(OC(F)(F)F)cc4)c1</chem>      | 8.4 | 8.3  | 8.4 |

|     |                                                                   |     |     |     |
|-----|-------------------------------------------------------------------|-----|-----|-----|
| 57  | Fe1ccc2c(oc2C3CC[NH+](CCCN(=O)(=O)c4cccc(c4)C)CC3)c1              | 8.4 | 8.2 | 8.4 |
| 58  | Fe1ccc2c(oc2C3CC[NH+](CCCN(=O)(=O)c4ccc(OC(F)(F)F)cc4)CC3)c1      | 8.4 | 8.5 | 8.4 |
| 59  | Fe1cc(F)ccc1CCC2CCN(CC2)C(=O)c3cccc3F                             | 8.4 | 7.8 | 8.4 |
| 60  | FC(F)(F)c1cccc(N2CC[NH+](CCCCNC(=O)c3cc4cccc4[nH]3)CC2)c1         | 8.4 | 7.5 | 8.4 |
| 61  | Fe1ccc2c(sec2N3CC[NH+](CC3)CCCCN4C(=O)C5(S[C@H]4C)CCCC5)c1        | 8.4 | 7.8 | 8.4 |
| 62  | O=C1c2cc(OCCC[NH+]3CCN(CC3)c4cccc5c4CCO5)ccc2CN1                  | 8.4 | 8.3 | 8.4 |
| 63  | Fe1ccc(C(=O)CCC[NH+]2CC[C@H]3[C@H](C2)c4cccc5c4N3CCN5Cc6cccc6)cc1 | 8.3 | 8.0 | 8.3 |
| 64  | O=C(N[C@H]1CCc2ccc(CC[NH+]3CCN(CC3)c4c5cccc5sn4)cc21)c6cccc6      | 8.3 | 8.3 | 8.3 |
| 65  | O=C1c2cc(OCCC[NH+]3CCN(CC3)c4cccc5CCCCe54)ccc2CN1                 | 8.3 | 8.6 | 8.3 |
| 66  | Clc1c(Cl)ccc(S(=O)(=O)NCCCC[NH+]2CCC(CC2)c3c4ccc(F)cc4on3)c1      | 8.3 | 8.6 | 8.3 |
| 67  | Clc1ccc(OCC(F)(F)c2cccc2)c(OC3C[NH2+]C3)c1                        | 8.3 | 8.0 | 8.3 |
| 68  | Fe1ccc2c(oc2C3CC[NH+](CC3)C[C@H]4CC(=O)c5ccoc5C4)c1               | 8.3 | 8.4 | 8.3 |
| 69  | Fe1ccc(C(=O)CCC[NH+]2CC[C@H]3[C@H](C2)c4cccc5c4N3C(CN5C)(C)C)cc1  | 8.3 | 7.9 | 8.3 |
| 70  | Fe1ccc(C(=O)C2CC[NH+](CC2)CCCCe3cccc3)cc1                         | 8.3 | 7.7 | 7.7 |
| 71  | Fe1ccc2c(oc2C3CC[NH+](CC3)C[C@H]4CC(=O)c5ccoc5C4)c1               | 8.3 | 8.4 | 8.3 |
| 72  | Fe1ccc(C(=O)CCC[NH+]2CC[C@H]3[C@H](C2)c4cccc5c4N3CCN5)cc1         | 8.3 | 8.4 | 8.3 |
| 73  | O=C1c2cc(OCCCC[NH+]3CCN(CC3)c4cccc5CCOCe54)ccc2CN1                | 8.3 | 7.7 | 8.3 |
| 74  | O=C(CCC[NH+]1CC[C@H]2[C@@H](C1)c3cccc4c3N2CCN4C)c5cccc5           | 8.2 | 8.5 | 8.2 |
| 75  | Fe1ccc2c(oc2C3CC[NH+](CC3)CCCCNS(=O)(=O)c4csc5cccc54)c1           | 8.2 | 8.6 | 8.2 |
| 76  | O=S(=O)(NCCCC[NH+]1CCN(CC1)c2c3cccc3sn2)c4cc5cccc5s4              | 8.2 | 8.3 | 8.2 |
| 77  | O=C(Nc1ccc(OC)c(CCC[NH+](C)C)c1)c2ccc(-c3ccc(cc3C)-c4noc(n4)C)cc2 | 8.2 | 7.8 | 8.2 |
| 78  | Clc1ccc2c(sc(S(=O)(=O)NCCCC[NH+]3CCN(CC3)c4c5cccc5sn4)c2)c1       | 8.2 | 8.9 | 8.2 |
| 79  | Fe1ccc2c(c(c(S(=O)(=O)NCCCC[NH+]3CCN(CC3)c4c5cccc5sn4)s2)C)c1     | 8.2 | 8.7 | 8.2 |
| 80  | Fe1ccc(C(=O)C2CC[NH+](CC2)C[C@H]3CC(=O)c4cnc(NC)nc4C3)cc1         | 8.2 | 8.3 | 8.2 |
| 81  | Clc1c(Cl)cccc1N2CC[NH+](CC2)CCc3cn(nn3)-c4ccn5c(c4)ccn5           | 8.2 | 7.9 | 8.1 |
| 82  | Clc1c(Cl)cccc1N2CC[NH+](CCCCNC(=O)c3cc4cccc4o3)CC2                | 8.1 | 7.9 | 8.1 |
| 83  | Fe1ccc2c(c(c(S(=O)(=O)NCCCC[NH+]3CCN(CC3)c4c5cccc5on4)s2)C)c1     | 8.1 | 7.6 | 8.1 |
| 84  | Fe1ccc(/C=C/c2ccc(S(=O)(=O)c3cccc3)cn2)cc1                        | 8.1 | 7.7 | 8.0 |
| 85  | C[NH+]1CCC(CC1)=C2c3ccsc3CCc4cccc42                               | 8.1 | 7.5 | 8.0 |
| 86  | O=S(=O)(NCCCC[NH+]1CCN(CC1)c2c3cccc3sn2)c4cccc5c4nes5             | 8.1 | 7.7 | 8.1 |
| 87  | Clc1ccc2c(ccc(S(=O)(=O)NCCCC[NH+]3CCN(CC3)c4c5cccc5on4)c2)c1      | 8.1 | 8.3 | 8.1 |
| 88  | Fe1ccc(C(=O)CCC[NH+]2CC[C@@H]3[C@H](C2)c4cccc5CCCN3c54)cc1        | 8.1 | 8.0 | 8.1 |
| 89  | Fe1ccc2c(sec2N3CC[NH+](CC3)CCCCN4C(=O)C(S[C@H]4C)(C)C)c1          | 8.1 | 7.6 | 8.1 |
| 90  | Fe1ccc(N2CC[NH+](CC2)CCCCNC(=O)c3cc4cccc4cn3)cc1                  | 8.1 | 7.7 | 8.1 |
| 91  | O=S(=O)(NCCCC[NH+]1CCN(CC1)c2c3cccc3sn2)c4cnc5cccn54              | 8.1 | 7.7 | 8.1 |
| 92  | Clc1ccc2c(ccc(S(=O)(=O)NCCCC[NH+]3CCN(CC3)c4c5cccc5sn4)c2)c1      | 8.1 | 7.9 | 8.1 |
| 93  | O=S(=O)(NCCC[NH+]1CCN(CC1)c2c3cccc3sn2)c4cccc5c4nes5              | 8.1 | 7.8 | 8.1 |
| 94  | O=S(=O)(NCC[NH+]1CCN(CC1)c2c3cccc3sn2)c4cccc(c4)C                 | 8.1 | 8.2 | 8.1 |
| 95  | Clc1c(Cl)cccc1N2CC[NH+](CC2)CCCCOc3ccc4c(NC(=O)CC4)c3             | 8.1 | 7.6 | 8.1 |
| 96  | O=S(=O)(N1CCC[C@@H]1CC[NH+]2CCN(CC2)c3cccc4e3ccs4)c5cccc6cccc65   | 8.1 | 8.5 | 8.1 |
| 97  | Fe1ccc2c(oc2C3CC[NH+](CCCN(=O)(=O)c4cccc5c4nes5)CC3)c1            | 8.0 | 7.8 | 8.0 |
| 98  | Clc1ccc([C@](OCC[C@@H]2CCC[NH+]2C)(c3cccc3)C)cc1                  | 8.0 | 7.6 | 8.0 |
| 99  | O=S(=O)(NCCC[NH+]1CCN(CC1)c2c3cccc3sn2)c4cccs4                    | 8.0 | 8.2 | 8.0 |
| 100 | Fe1ccc2c(oc2C3CC[NH+](CC3)CCCCNS(=O)(=O)c4cccs4)c1                | 8.0 | 8.4 | 8.0 |
| 101 | Clc1ccc2c(Cc3ccenc3C2=C4CC[NH2+]CC4)c1                            | 8.0 | 7.4 | 7.9 |
| 102 | Fe1ccc2c(oc2C3CC[NH+](CC3)CCCCNS(=O)(=O)c4cnc5cccn54)c1           | 8.0 | 7.7 | 8.0 |
| 103 | FC(F)(F)Oe1ccc(S(=O)(=O)NCCC[NH+]2CCN(CC2)c3c4cccc4sn3)cc1        | 8.0 | 8.2 | 8.0 |
| 104 | O=C(C1CC[NH+](CC1)CCc2cccc2)c3cccc3                               | 8.0 | 8.5 | 8.0 |
| 105 | O=C1c2cc(OCCCC[NH+]3CCN(CC3)c4cccc5CCc54)ccc2CN1                  | 8.0 | 7.8 | 8.0 |

|     |                                                                     |     |     |     |
|-----|---------------------------------------------------------------------|-----|-----|-----|
| 106 | Clc1cccc(N2CC[NH+](CCCCOe3ccc4c(NC(=O)CC4)n3)CC2)c1F                | 8.0 | 7.4 | 8.0 |
| 107 | O=S(=O)(NCCC[NH+]1CCN(CC1)c2e3cccc3sn2)c4ccc5cccc5s4                | 8.0 | 8.4 | 8.0 |
| 108 | Clc1ccc2c(NC(=O)N2C3CC[NH+](CC3)CCCN4C(=O)Nc5cccc54)c1              | 8.0 | 8.1 | 8.0 |
| 109 | Clc1ccc2e(sc(S(=O)(=O)NCCCC[NH+]3CCN(CC3)c4e5cccc5on4)c2)c1         | 8.0 | 7.8 | 8.0 |
| 110 | O=C1c2cc(OCCC[NH+]3CCN(CC3)c4cccc5CCOCc54)ccc2CN1                   | 8.0 | 7.6 | 8.0 |
| 111 | O=C1c2cc(OCCCC[NH+]3CCN(CC3)c4cccc5COCCc54)ccc2CN1                  | 8.0 | 8.2 | 7.9 |
| 112 | Fe1ccc2c(onc2C3CC[NH+](CC[C@@H]4CCCN4S(=O)(=O)c5cccc6e5cccn6)CC3)c1 | 7.9 | 7.6 | 7.9 |
| 113 | Clc1c(Cl)ccc(S(=O)(=O)NCCCC[NH+]2CCN(CC2)c3c4cccc4sn3)c1            | 7.9 | 8.2 | 7.9 |
| 114 | Clc1c(C(F)(F)F)cccc1N2CC[NH+](CCCCOe3ccc4c(NC(=O)CC4)n3)CC2         | 7.9 | 7.7 | 7.9 |
| 115 | Fe1ccc2c([C@@H]3[C@H](C[C@H](O3)C[NH+](C)C)c4cccc4S2)c1             | 7.9 | 7.4 | 7.9 |
| 116 | O=S(=O)(NCCCC[NH+]1CCN(CC1)c2c3cccc3on2)c4cnc5cccn54                | 7.9 | 7.9 | 7.9 |
| 117 | Fe1cc(OC2CCC(CC2)(C)C)c(F)cc1CNC(=O)[C@@H]3CCC[NH2+]3               | 7.9 | 7.7 | 7.9 |
| 118 | Fe1ccc2c(c(c(S(=O)(=O)NCCC[NH+]3CCN(CC3)c4c5cccc5sn4)s2)C)c1        | 7.9 | 7.8 | 7.8 |
| 119 | Fe1ccc(C(=O)CCC[NH+]2CC[C@H]3[C@H](C2)c4cccc5c4N3CCN5CCCC)cc1       | 7.9 | 8.2 | 7.9 |
| 120 | Clc1c(F)ccc(S(=O)(=O)NCCC[NH+]2CCN(CC2)c3c4cccc4sn3)c1              | 7.9 | 8.4 | 7.9 |
| 121 | O=C(NCCCC[NH+]1CCN(CC1)c2cccc(c2)C)c3cc4cccc4cn3                    | 7.8 | 7.4 | 7.8 |
| 122 | Fe1ccc(C(=O)CCC[NH+]2CCC(S(=O)(=O)c3cccc3)CC2)cc1                   | 7.8 | 7.9 | 7.8 |
| 123 | O=S(=O)(C1CC[NH+](CC1)CCCc2cccc2)c3cccc3                            | 7.8 | 8.2 | 7.8 |
| 124 | Clc1c(F)ccc(S(=O)(=O)NCCCC[NH+]2CCN(CC2)c3c4cccc4sn3)c1             | 7.8 | 7.5 | 7.8 |
| 125 | Clc1c(Cl)cccc1N2CC[NH+](CC2)CCCCc3cn(n3)-c4cnc5(c4)c(cn5)C=O        | 7.8 | 8.2 | 7.8 |
| 126 | O=S(=O)(N1CCC[C@@H]1CC[NH+]2CCN(CC2)c3c4cccc4sn3)c5cccc6cnccc65     | 7.8 | 8.0 | 7.8 |
| 127 | Clc1c(Cl)cccc1N2CC[NH+](CC[C@H](O)CNC(=O)c3ccc(-c4cccn4)cc3)CC2     | 7.8 | 7.8 | 7.8 |
| 128 | Clc1cccc1N2CC[NH+](CCCCOe3ccc4c(NC(=O)CC4)n3)CC2                    | 7.8 | 7.5 | 7.8 |
| 129 | O=S(=O)(N1CCC[C@@H]1CC[NH+]2CCN(CC2)c3c4cccc4sn3)c5cccc6c5cccn6     | 7.8 | 8.6 | 7.8 |
| 130 | O1c2cccc2CCC31CC[NH+](CC3)CCc4cccc4                                 | 7.8 | 8.1 | 7.8 |
| 131 | Clc1ccc2c(CCC3(CC[NH+](CC3)CCc4cccc4)C2=O)c1                        | 7.8 | 7.9 | 7.8 |
| 132 | Fe1cc(F)ccc1CC[NH+]2CCC3(CC2)C=Cc4cc(F)ccc4O3                       | 7.8 | 7.3 | 7.5 |
| 133 | Clc1c(Cl)cccc1N2CC[NH+](CC2)CCCCOe3ccn4c(c3)cc(n4)CO                | 7.8 | 7.9 | 7.8 |
| 134 | Clc1c(Cl)cccc1N2CC[NH+](CCCCNC(=O)c3cc4cccc4s3)CC2                  | 7.8 | 7.8 | 7.8 |
| 135 | O=C(NCCCC[NH+]1CCN(CC1)c2cccc(c2)C)c3ccc4cccc4n3                    | 7.8 | 7.4 | 7.8 |
| 136 | O=C1c2cc(OCCCC[NH+]3CCN(CC3)c4cccc5c4OCCC5)ccc2CN1                  | 7.8 | 7.4 | 7.8 |
| 137 | Fe1ccc(S(=O)(=O)c2cnc(cc2)/C=C/c3ccc(F)cc3)cc1                      | 7.8 | 7.2 | 7.6 |
| 138 | Fe1ccc(C(=O)C2CC[NH+](C[C@@H]3CC(=O)c4cc(oc4C3)-c5cccc5)CC2)cc1     | 7.8 | 7.8 | 7.8 |
| 139 | Fe1ccc2c(onc2C3CC[NH+](CC3)C[C@H]4CC(=O)c5cnn(c5C4)C)c1             | 7.8 | 7.5 | 7.8 |
| 140 | Fe1cccc1N2CC[NH+](CCCCNC(=O)c3cc4cccc4o3)CC2                        | 7.7 | 7.4 | 7.7 |
| 141 | Fe1ccc2c([nH]nc2CCC[NH+]3CC[C@H]4[C@@H](C3)c5cccc6c5N4CCN6C)c1      | 7.7 | 7.7 | 7.7 |
| 142 | Fe1ccc2c(onc2C3CC[NH+](CC3)CC[C@@H]4C(=O)c5cc([N+](O-)=O)ccc5CC4)c1 | 7.7 | 8.0 | 7.7 |
| 143 | Fe1ccc(S(=O)(=O)c2ccc(CCc3ccc(F)cc3)cn2)cc1                         | 7.7 | 8.0 | 7.7 |
| 144 | Fe1ccc2c(c(CCC[NH+]3CCN(CC3)c4cccc5c4O[C@@H](C(=O)N5)C)c[nH]2)c1    | 7.7 | 7.3 | 7.7 |
| 145 | [O-]C(=O)C[C@@H]1CC[NH+](C[C@H]2CC[C@]3(C2)c4cccc4Cc5cccc5C3)C1     | 7.7 | 6.9 | 7.2 |
| 146 | O=S(=O)(N1CCC[C@@H]1CC[NH+]2CCN(CC2)c3c4cccc4sn3)c5cccc6c5cccn6     | 7.7 | 7.8 | 7.7 |
| 147 | O=C(NCCCC[NH+]1CCN(CC1)c2cccc2)[C@@H]3CCc4cccc4N3                   | 7.7 | 7.2 | 7.7 |
| 148 | Clc1c(Cl)cccc1N2CC[NH+](CCCCNC(=O)c3ccc(-c4cccn4)cc3)CC2            | 7.6 | 7.6 | 7.6 |
| 149 | [NH3+]C[C@H]1c2cccc2Cc3cc(OCCCC)ccc31                               | 7.6 | 7.3 | 7.5 |
| 150 | Clc1ccc(N2CC[NH+](CCC2)CCCC(=O)c3ccc(F)cc3)cc1                      | 7.6 | 7.5 | 7.6 |
| 151 | O=C(Nc1cccc1SCCC[NH+](C)C)/C=C/c2cccc2                              | 7.6 | 7.4 | 7.6 |
| 152 | O=C1c2cc(OCCC[NH+]3CCN(CC3)c4cccc5c4OCCC5)ccc2CN1                   | 7.6 | 7.4 | 7.6 |
| 153 | O=C(CCC[NH+]1CCC(OC(c2cccc2)c3cccc3)CC1)c4ccc(C(C)(C)C)cc4          | 7.6 | 8.2 | 7.6 |
| 154 | O=S(=O)(N1CCCCC[C@@H]1CC[NH+]2CCN(CC2)c3c4cccc4sn3)c5cnc6cccc65     | 7.6 | 8.0 | 7.6 |

|     |                                                                                   |     |     |     |
|-----|-----------------------------------------------------------------------------------|-----|-----|-----|
| 155 | <chem>O=C(NCCCC[NH+])CCN(CC1)c2cccc([nH+]2)C)c3cc4cccc4o3</chem>                  | 7.6 | 8.0 | 7.6 |
| 156 | <chem>Fe1ccc(S(=O)(=O)c2ccc(en2)/C=C\c3ccc(F)cc3)cc1</chem>                       | 7.6 | 7.1 | 7.5 |
| 157 | <chem>O=S(=O)(N1CC[C@@H]1CC[NH+]2CCN(CC2)c3c4cccc4sn3)c5cccc6c5cccn6</chem>       | 7.5 | 7.3 | 7.5 |
| 158 | <chem>Fe1ccc(C(=O)C2CC[NH+](CC2)C[C@@H]3CC(=O)c4enn(c4C3)C)cc1</chem>             | 7.5 | 7.4 | 7.5 |
| 159 | <chem>Clc1c(Cl)cccc1N2CC[NH+](CCCCNC(=O)c3cc4cccc4[nH]3)CC2</chem>                | 7.5 | 7.4 | 7.5 |
| 160 | <chem>O=S(=O)(N1CCCC[C@@H]1CC[NH+]2CCN(CC2)c3cccc4c3ccs4)c5cccc6c5cccn6</chem>    | 7.5 | 7.2 | 7.5 |
| 161 | <chem>Clc1ccc(N2CC[NH+](CCCc3nc4cccc4s3)CC2)cc1</chem>                            | 7.4 | 7.5 | 7.4 |
| 162 | <chem>Oc1ccc(N2CC[NH+](CCCCOc3ccc4c(NC(=O)CC4)c3)CC2)c5cccnc15</chem>             | 7.4 | 7.3 | 7.4 |
| 163 | <chem>Br1cccc1Cn2c(c(n2)C(=O)NCCCC[NH+]3CCN(CC3)c4cccc4OC)C</chem>                | 7.4 | 7.1 | 7.4 |
| 164 | <chem>Clc1c(Cl)cccc1N2CC[NH+](CCCOc3cc(cc4c3C(C)=CC(O4)=O)C)CC2</chem>            | 7.4 | 7.1 | 7.4 |
| 165 | <chem>Fe1ccc(C(=O)C2CC[NH+](CC2)C[C@@H]3CC(=O)c4cn[nH]c4C3)cc1</chem>             | 7.4 | 6.8 | 7.4 |
| 166 | <chem>Clc1c(Cl)cccc1N2CC[NH+](CC2)C/C=C/CNC(=O)c3ccc(cc3)-c4c(cccn4)C</chem>      | 7.3 | 7.9 | 7.3 |
| 167 | <chem>Clc1c(Cl)cccc1N2CC[NH+](CC2)CCc3cn(mn3)-c4ccn5c(c4)c(cn5)C=O</chem>         | 7.3 | 7.2 | 7.3 |
| 168 | <chem>O=C(Nc1cc(OCC[NH+](C)C)c2e(CCO2)c1)c3ccc(-c4ccc(cc4C)-e5noc(n5)C)cc3</chem> | 7.3 | 7.1 | 7.3 |
| 169 | <chem>[O-]C(=O)CC1C[NH+](C[C@@H]2CC[C@@]3(C2)c4cccc4Cc5cccc5C3)C1</chem>          | 7.3 | 7.2 | 7.3 |
| 170 | <chem>Clc1cccc(N2CC[NH2+]CC2)c1</chem>                                            | 7.3 | 6.9 | 7.0 |
| 171 | <chem>Fe1cccc1N2CC[NH+](CCCOc3ccc(cc4c3C(C)=CC(O4)=O)C)CC2</chem>                 | 7.3 | 7.0 | 7.3 |
| 172 | <chem>O=S(=O)(N1CCC[C@@H]1CC[NH+]2CCN(CC2)c3cccc4c3ccs4)c5cccc6c5cccn6</chem>     | 7.3 | 7.3 | 7.3 |
| 173 | <chem>[NH3+]CC1c2cccc2Cc3cccc31</chem>                                            | 7.2 | 7.0 | 7.2 |
| 174 | <chem>FC(F)(F)c1cccc2c1C(=O)N3CC[NH2+]C[C@@H]23</chem>                            | 7.2 | 6.5 | 6.9 |
| 175 | <chem>Br1cccc1Cn2c(CCC)c(mn2)C(=O)NCCCC[NH+]3CCN(CC3)c4cccc4OC</chem>             | 7.2 | 7.7 | 7.2 |
| 176 | <chem>FC(F)(F)c1c(OC)cc2e(N(CC2)C(=O)Nc3nccc(-c4nccc4)c3)c1</chem>                | 7.2 | 6.9 | 7.2 |
| 177 | <chem>Fe1cccc1S(=O)(=O)c2ncc(cc2)/C=C/c3ccc(F)cc3OC</chem>                        | 7.2 | 7.9 | 7.7 |
| 178 | <chem>FC(F)(F)Oc1cccc2c1C(=O)N3CC[NH2+]C[C@@H]23</chem>                           | 7.2 | 6.7 | 6.8 |
| 179 | <chem>C[NH+]1CCN2c3c(Cc4cccc4[C@@H]2C1)cccc[nH+]3</chem>                          | 7.2 | 7.1 | 7.2 |
| 180 | <chem>Clc1ccc(N2CC[NH+](CCCOc3ccc(cc4c3C(C)=CC(O4)=O)C)CC2)cc1</chem>             | 7.2 | 7.4 | 7.2 |
| 181 | <chem>O=C(NC/C=C/C[NH+]1CCN(CC1)c2cccc2OC)c3ccc(-c4cccc4)cc3</chem>               | 7.1 | 7.2 | 7.1 |
| 182 | <chem>O=C(NCCCC[NH+]1CCN(CC1)c2cccc(c2)C)[C@@H]3CCc4cccc4N3</chem>                | 7.1 | 8.0 | 7.1 |
| 183 | <chem>[NH3+]CCc1ccc(CCCCC)cc1</chem>                                              | 7.1 | 7.1 | 7.1 |
| 184 | <chem>F[C@]1(CCC[NH+](C[C@H]2CC[C@@]3(C2)c4cccc4Cc5cccc5C3)C1)C([O-])=O</chem>    | 7.1 | 6.5 | 7.0 |
| 185 | <chem>[O-]C(=O)C1CC[NH+](C[C@H]2CC[C@@]3(C2)c4cccc4Cc5cccc5C3)CC1</chem>          | 7.1 | 7.1 | 7.1 |
| 186 | <chem>Clc1ccc(OC)c2c1C(=O)N3CC[NH2+]C[C@@H]23</chem>                              | 7.1 | 6.8 | 7.1 |
| 187 | <chem>Fe1ccc2c(CCC3(O2)CC[NH+](C[C@@H]4Cc5cccc5CC4)CC3)c1</chem>                  | 7.0 | 7.6 | 7.3 |
| 188 | <chem>Clc1c(F)ccc(S(=O)(=O)NCCC[NH+]2CCN(CC2)c3c4cccc4on3)c1</chem>               | 7.0 | 6.9 | 7.0 |
| 189 | <chem>O=C(NCCCC[NH+]1CCN(CC1)c2cccc2OC)c3cccn4c3ccn4</chem>                       | 7.0 | 7.2 | 7.0 |
| 190 | <chem>[O-]C(=O)[C@@H]1C[NH+](C[C@H]2CC[C@@]3(C2)c4cccc4Cc5cccc5C3)CCO1</chem>     | 7.0 | 6.7 | 7.0 |
| 191 | <chem>FC(F)(F)c1c(OC)cc2e(N(CC2)C(=O)Nc3nccc(Oc4nccc4)cc3)c1</chem>               | 7.0 | 6.9 | 7.0 |
| 192 | <chem>O=C(NCCCC[NH+]1CCN(CC1)c2cccc2)c3cccn3</chem>                               | 7.0 | 7.0 | 7.0 |
| 193 | <chem>Fe1ccc(C(=O)C2CC[NH+](CC2)C[C@H]3CC(=O)c4ncc(SC)nc4C3)cc1</chem>            | 7.0 | 7.5 | 7.0 |
| 194 | <chem>Br1cccc(CCC[NH+](CCc2ccc3c(OCO3)e2)CCc4ccc(OC)c(OC)c4)c1</chem>             | 7.0 | 6.8 | 7.0 |
| 195 | <chem>O=S(=O)(N1CCC[C@H]1CC[NH+]2CCN(CC2)c3cccc4c3OCCO4)c5cccc6c5cccn6</chem>     | 7.0 | 7.0 | 7.0 |
| 196 | <chem>FC(F)(F)c1cccc2c1C(=O)N3CC[NH2+]C[C@@H]23</chem>                            | 7.0 | 6.5 | 7.0 |
| 197 | <chem>O=C1C=C(c2c(O1)cc(cc2OCCCC[NH+]3CCN(CC3)c4cccc4C#N)C)C</chem>               | 7.0 | 7.1 | 7.0 |
| 198 | <chem>FC(F)(F)c1cccc2c1C(=O)N3CC[NH2+]C[C@H](C[C@H]23)C</chem>                    | 6.9 | 6.4 | 6.8 |
| 199 | <chem>Clc1ccc2c(c3C(=O)N(Cc3n2C)c4ccc(OC)c(OCC[NH+]5CCCC(CC5)C)c4)c1</chem>       | 6.9 | 6.9 | 6.9 |
| 200 | <chem>Fe1ccc2c(onc2C3CC[NH+](C[C@H]4CC(=O)c5ncc(nc5C4)-c6cccc6)CC3)c1</chem>      | 6.9 | 7.3 | 6.9 |
| 201 | <chem>Clc1c(cc2CCN(c2c1)C(=O)Nc3nccc(Oc4cccnc4)C)c(c3)C)C</chem>                  | 6.9 | 6.7 | 6.9 |
| 202 | <chem>N#C[C@@](CCC[NH+](CCc1ccc(OC)c(OC)c1)C)(C(C)C)c2ccc(OC)c(OC)c2</chem>       | 6.9 | 6.4 | 6.9 |
| 203 | <chem>C[NH+](CCO[C@@H](c1cccc1)c2cccc2)C</chem>                                   | 6.9 | 6.8 | 6.9 |

|     |                                                                                      |     |     |     |
|-----|--------------------------------------------------------------------------------------|-----|-----|-----|
| 204 | <chem>Ic1c(F)cc2c(N(CC2)C[C@@H]([NH3+])C)c1</chem>                                   | 6.9 | 6.8 | 6.9 |
| 205 | <chem>O=C(NCCCC[NH+])CCN(CC1)c2ccccc2OC)c3c(n(nn3)Cc4ccc(OC)cc4)C</chem>             | 6.9 | 6.5 | 6.9 |
| 206 | <chem>O=C(NCCCC[NH+])CCN(CC1)c2ccccc2OC)c3c(n(nn3)Cc4cccc4)C</chem>                  | 6.9 | 6.5 | 6.8 |
| 207 | <chem>Fc1ccccc1S(=O)(=O)c2enc(cc2)/C=C\c3cccc(F)c3</chem>                            | 6.8 | 6.6 | 6.8 |
| 208 | <chem>Clc1ccc2c(c3C(=O)N(Cc3n2C)c4ccc(OC)c(OCC[NH+])5CCCCC5)c4)c1</chem>             | 6.8 | 6.9 | 6.8 |
| 209 | <chem>[O-]C(=O)CC[NH2+][C@H]1CC[C@]2(C1)c3ccccc3Cc4cccc4C2</chem>                    | 6.8 | 7.1 | 6.8 |
| 210 | <chem>FC(F)(F)c1cc2c(CCN2C(=O)Nc3enc(Oc4ccenc4C)cc3)cc1C</chem>                      | 6.8 | 6.5 | 6.8 |
| 211 | <chem>Clc1ccc(N2CC[NH+](CCC2)CCCCc3nc4cccc4s3)cc1</chem>                             | 6.8 | 7.4 | 7.2 |
| 212 | <chem>Brclcc2c(CCN2C(=O)Nc3enc(Oc4ccenc4C)cc3)cc1C</chem>                            | 6.8 | 6.7 | 6.8 |
| 213 | <chem>Clc1c(F)cc2c(N(CC2)C[C@@H]([NH3+])C)c1</chem>                                  | 6.8 | 6.5 | 6.8 |
| 214 | <chem>Clc1cccc2c1C(=O)N[C@@H]3CC[NH2+]CCN23</chem>                                   | 6.8 | 6.2 | 6.8 |
| 215 | <chem>[NH3+][C@H](CN1c2cc(SC)ccc2CC1)C</chem>                                        | 6.8 | 6.6 | 6.8 |
| 216 | <chem>[NH3+][C@H](CN1c2cc(SCC)ccc2CC1)C</chem>                                       | 6.7 | 6.8 | 6.7 |
| 217 | <chem>O=C1C=C(c2c(O1)cc(cc2OCCCC[NH+])3CCN(CC3)c4cccc(OC)c4)C)C</chem>               | 6.7 | 6.8 | 6.7 |
| 218 | <chem>O=Cc1cc2cc(OCCCC[NH+])3CCN(CC3)c4cccc4OC)ccn2n1</chem>                         | 6.7 | 7.2 | 6.7 |
| 219 | <chem>Fc1cccc(CCC[NH+](CCc2ccc3c(OCO3)c2)CCc4ccc(OC)c(OC)c4)c1</chem>                | 6.7 | 7.2 | 6.7 |
| 220 | <chem>COc1ccc(CC[NH+](CCCc2cccc(OC)c2)CCc3ccc4c(OCO4)c3)cc1OC</chem>                 | 6.7 | 7.1 | 6.7 |
| 221 | <chem>[NH3+][C@H](c1ccc(CCCCC)cc1)c2ccccc2</chem>                                    | 6.7 | 7.1 | 6.7 |
| 222 | <chem>FC(F)(F)c1cc2c(CCN2C(=O)Nc3cc(cc(CC)c3)-c4enccc4)cc1OC</chem>                  | 6.7 | 6.6 | 6.7 |
| 223 | <chem>C[NH+][C@H]1CCc2cc(OC)c(OC)c3-c4cc(OC)c(Oc5ccccc5)cc4C[C@H]1c32</chem>         | 6.7 | 6.5 | 6.7 |
| 224 | <chem>O=C(NCCCC[NH+])CCN(CC1)c2ccccc2OC)c3cc4ccccn4n3</chem>                         | 6.7 | 6.8 | 6.7 |
| 225 | <chem>Clc1ccc(OCc2csc(n2)C)c(OC3C[NH2+]C3)c1</chem>                                  | 6.7 | 6.7 | 6.7 |
| 226 | <chem>[NH3+][C@H](Cn1ccc2ccc3ccncc3c21)C</chem>                                      | 6.6 | 6.8 | 6.8 |
| 227 | <chem>Clc1ccc2c(n(c3CN(C(=O)c23)c4ccc(OC)c(OCC[NH+])5CCC(CC5)C)c4)C)c1</chem>        | 6.6 | 6.2 | 6.6 |
| 228 | <chem>Fc1cccc2c1n(c3CN(c4ccc(OC)c(OCC[NH+])5CCC(CC5)C)c4)C(=O)c23)C</chem>           | 6.6 | 7.2 | 6.6 |
| 229 | <chem>FC(F)(F)c1c(SC)cc2c(N(CC2)C(=O)Nc3enc(Oc4ccenc4C)cc3)c1</chem>                 | 6.6 | 6.4 | 6.6 |
| 230 | <chem>FC(F)(F)c1c(OC)cc2c(N(CC2)C(=O)Nc3cccc(-c4enccc4C)c3)c1</chem>                 | 6.6 | 6.3 | 6.6 |
| 231 | <chem>Clc1c(Cl)cc2c(CCN2C(=O)Nc3enc(Oc4ccenc4C)cc3)c1</chem>                         | 6.6 | 6.2 | 6.6 |
| 232 | <chem>C[NH+][C@H]1CCc2c(C1)c3cccc4-c5ccccc5CCn2c43</chem>                            | 6.6 | 6.4 | 6.6 |
| 233 | <chem>O=C1c2ccccc2N3CC[NH2+]CC[C@H]3N1</chem>                                        | 6.6 | 6.6 | 6.6 |
| 234 | <chem>Clc1ccc2c([NH+]=C(NC3CC[NH+](CC3)Cc4cccc4)c5ccccc5O2)c1</chem>                 | 6.6 | 6.9 | 6.6 |
| 235 | <chem>Clc1ccc2c(n(c3CN(C(=O)c23)c4ccc(OC)c(OCC[NH+])5CCCCC5)c4)C)c1</chem>           | 6.5 | 6.4 | 6.5 |
| 236 | <chem>Clc1ccc2c(N(CC2)C(=O)Nc3enc(Oc4ccenc4C)cc3)c1</chem>                           | 6.5 | 6.2 | 6.5 |
| 237 | <chem>Fc1ccc(SCCC[NH+])2Cc3ccccc3CC2)cc1</chem>                                      | 6.5 | 7.2 | 7.2 |
| 238 | <chem>Clc1cccc2c1C(=O)N[C@H]3C[NH2+]CCN23</chem>                                     | 6.5 | 6.3 | 6.5 |
| 239 | <chem>Brclcc2c(N(CC2)C[C@@H]([NH3+])C)c1</chem>                                      | 6.5 | 6.8 | 6.7 |
| 240 | <chem>FC(F)(F)c1cccc2c1C(=O)N3[C@H](C[NH2+])C[C@@H]23)C</chem>                       | 6.4 | 6.7 | 6.6 |
| 241 | <chem>Clc1ccc(CCC[NH+](CCc2ccc3c(OCO3)c2)CCc4ccc(OC)c(OC)c4)cc1</chem>               | 6.4 | 6.4 | 6.4 |
| 242 | <chem>Oc1c(c(CC2=[NH+])CCN2)c(cc1C(C)(C)C)C)C</chem>                                 | 6.4 | 7.0 | 6.9 |
| 243 | <chem>Clc1c(Cl)ccc2c1C(=O)N3CC[NH2+]C[C@@H]23</chem>                                 | 6.4 | 6.3 | 6.4 |
| 244 | <chem>Clc1c(Cl)ccc([C@@H]2C(=O)N(CC2)c3ccc(OC)c(OCC[NH+])4CCCC(CC4)(C)C)c3)c1</chem> | 6.4 | 6.5 | 6.4 |
| 245 | <chem>Fc1ccc(C=2C(=O)N(c3ccc(OC)c(OCC[NH+])4CCCCC4)c3)CC2)cc1</chem>                 | 6.4 | 6.2 | 6.4 |
| 246 | <chem>FC(F)(F)c1c(SC)cc2c(N(CC2)C(=O)Nc3enccc3)c1</chem>                             | 6.4 | 6.3 | 6.4 |
| 247 | <chem>[NH2+](CC1c2ccccc2Cc3ccccc31)CCc4cccc4</chem>                                  | 6.4 | 7.1 | 7.1 |
| 248 | <chem>[NH3+][C@H](CN1c2c(CC1)ccc3c2CCCO3)C</chem>                                    | 6.4 | 6.4 | 6.4 |
| 249 | <chem>Brclccc(COc2c(OC)cc-3c(C[C@H]4c5c3c(OC)c(OC)cc5CC[NH+])4C)c2)cc1</chem>        | 6.4 | 6.5 | 6.4 |
| 250 | <chem>O=C(NCCCC[NH+])CCN(CC1)c2ccccc2OC)c3cc4ccccn4n3</chem>                         | 6.4 | 6.8 | 6.4 |
| 251 | <chem>Clc1cccc(Cn2c3c(nc2CC)c(N4CC[NH2+]CC4)ccn3)c1</chem>                           | 6.4 | 6.6 | 6.4 |
| 252 | <chem>Clc1cccc2c1[C@@H](NC(=[NH+])2)NCC(F)F)C</chem>                                 | 6.3 | 6.4 | 6.3 |

|     |                                                                                     |     |     |     |
|-----|-------------------------------------------------------------------------------------|-----|-----|-----|
| 253 | Clc1c(Cl)ccc(N2CC[C@@](C2=O)(c3ccc(OC)c(OCC[NH+]4CCCCC4)c3)C)c1                     | 6.3 | 6.8 | 6.3 |
| 254 | FC(F)(F)c1cc2c(CCN2C(=O)Nc3cccc(-c4ccenc4C)c3)cc1OC                                 | 6.3 | 6.2 | 6.3 |
| 255 | FC(F)(F)c1cc2c(c3c1OCC3)CCN2C(=O)Nc4cnc(Oc5ccenc5C)cc4                              | 6.3 | 6.3 | 6.3 |
| 256 | Clc1c(F)cc2e(N(CC2)C(=O)Nc3enc(Oc4ccenc4C)cc3)c1                                    | 6.3 | 6.0 | 6.3 |
| 257 | FC(F)(F)c1cc(cc2c1C(=O)N3CC[NH2+]C[C@@H]23)C                                        | 6.3 | 6.4 | 6.2 |
| 258 | O=C1c2cc(OC)c(cc2[C@@H]3C[NH2+]CCN13)CC                                             | 6.2 | 6.9 | 6.7 |
| 259 | Oc1ccc(N2CC[NH+](CC2)CCCCOc3ccn4c(c3)c(cn4)/C=N/O)c5c1OCCO5                         | 6.2 | 6.4 | 6.2 |
| 260 | FC(F)(F)c1cccc([C@@H](Oc2ccc(cc2OC3C[NH2+]C3)C(F)(F)F)C)c1                          | 6.2 | 6.5 | 6.2 |
| 261 | FC(F)(F)c1cc(cc2c1C(=O)N3CC[NH2+]C[C@@H]23)CCCC                                     | 6.2 | 6.3 | 6.2 |
| 262 | Fc1ccc(C(=O)C2CC[NH+](C[C@@H]3CC(=O)c4cnc(nc4C3)-c5ccccc5)CC2)cc1                   | 6.2 | 6.9 | 6.6 |
| 263 | Clc1cccc(N2C(=O)N(CC[NH+]3Cc4ccccc4C3)CC2)c1                                        | 6.2 | 6.8 | 6.2 |
| 264 | [O-]C(=O)CC1CC[NH+](C[C@@H]2CC[C@@]3(C2)c4ccccc4Cc5ccccc5C3)CC1                     | 6.2 | 6.5 | 6.2 |
| 265 | FC(F)(F)c1c(OC)cc2c(N(CC2)C(=O)Nc3cnc(Oc4ccenc4C)cc3C)c1                            | 6.2 | 6.3 | 6.2 |
| 266 | O=C1C(=CCN1c2ccc(OC)c(OCC[NH+]3CCC(CC3)C)c2)c4ccc(cc4)C                             | 6.2 | 7.0 | 6.2 |
| 267 | [O-]<br>]C(=O)C1[C@H]2C[NH+](C[C@@H]3CC[C@@]4(C3)c5ccccc5Cc6ccccc6C4)C[C@@H]<br>]12 | 6.2 | 6.3 | 6.2 |
| 268 | C[NH+]1CCc2c(c3cccc4Cc5ccccc5Cn2c43)C1                                              | 6.1 | 6.8 | 6.5 |
| 269 | Clc1c(Cl)cc([C@H]2c3ccccc3[C@@H]([NH2+]C)CC2)cc1                                    | 6.1 | 6.1 | 6.1 |
| 270 | Clc1cccc(C=2C(=O)N(c3ccc(OC)c(OCC[NH+]4CCC(CC4)C)c3)CC2)c1                          | 6.1 | 6.1 | 6.1 |
| 271 | Clc1cc2c(CCN2C(=O)Nc3enc(Oc4ccenc4C(C)C)cc3)cc1C                                    | 6.1 | 6.5 | 6.1 |
| 272 | Fc1cc2c(CCN2C(=O)Nc3enc(Oc4ccenc4C)cc3)cc1C                                         | 6.1 | 6.5 | 6.3 |
| 273 | FC(F)(F)c1cccc(C=2C(=O)N(c3ccc(OC)c(OCC[NH+]4CCCCC4)c3)CC2)c1                       | 6.1 | 6.6 | 6.1 |
| 274 | FC(F)(F)c1cc(cc2c1C(=O)N3CC[NH2+]C[C@@H]23)C=C                                      | 6.1 | 6.3 | 6.1 |
| 275 | COe1ccc(OC)cc1CCC[NH+](CCc2ccc3c(OCO3)e2)CCc4ccc(OC)c(OC)c4                         | 6.0 | 6.5 | 6.0 |
| 276 | O=C1c2c3cc(OC)ccc3n(e2CN1c4ccc(OC)c(OCC[NH+]5CCCCC5)c4)C                            | 6.0 | 6.1 | 6.0 |
| 277 | FC(F)(F)c1c(OC)cc2c(N(CC2)C(=O)Nc3ccc(C(C)(C)C)c(-c4cnc4)c3)c1                      | 6.0 | 5.9 | 6.0 |
| 278 | Clc1c(Cl)ccc(N2C(=O)N(CC2)c3enc(OCC[NH+]4CCCCC4)cc3)c1                              | 6.0 | 6.2 | 6.0 |
| 279 | Clc1ccc(N2CC[NH+](CCC2)CCCC(=O)c3nc4ccccc4s3)cc1                                    | 6.0 | 6.3 | 6.4 |
| 280 | FC(F)(F)c1cc(CCC)cc2c1C(=O)N3CC[NH2+]C[C@@H]23                                      | 6.0 | 6.1 | 6.0 |
| 281 | Clc1cc(Cl)ccc1CO/N=C(/c2c(Cl)cc(Cl)cc2)Cn3cnc3                                      | 5.9 | 6.2 | 5.9 |
| 282 | Clc1ccc(NC(=O)N2CCc3cc(OC)c(cc32)C(F)(F)F)cc1-c4cnc4                                | 5.9 | 6.4 | 6.3 |
| 283 | [NH3+]C[C@H]1c2ccccc2Cc3ccc(OC)cc31                                                 | 5.9 | 6.1 | 5.9 |
| 284 | FC(F)(F)c1cc(OC)cc2c1C(=O)N3CC[NH2+]C[C@@H]23                                       | 5.9 | 6.1 | 5.9 |
| 285 | Oc1ccc(N2CC[NH+](CCC2)CCCCNC(=O)c3ccc(OCCCc4cn(mn4)CCCC)c(OC)c3)c5<br>C=CC(=O)Nc15  | 5.8 | 6.0 | 5.8 |
| 286 | FC(F)(F)c1ccc(C=2C(=O)N(c3ccc(OC)c(OCC[NH+]4CCC(CC4)C)c3)CC2)cc1                    | 5.8 | 5.9 | 5.8 |
| 287 | O=C(c1c(cc2c(c1OCCCC[NH+]3CCN(CC3)c4cc[nH+]cc4)C(=CC(O2)=O)C)C)C                    | 5.8 | 5.9 | 5.8 |
| 288 | O=C1c2ccccc2N3CC[NH2+]C[C@@H]3N1                                                    | 5.7 | 6.3 | 6.0 |
| 289 | Fc1cccc(N2C(=O)N(CC2)c3ccc(OC)c(OCC[NH+]4CCCCC4)c3)c1                               | 5.7 | 6.2 | 5.7 |
| 290 | Clc1ccc(N2CC[NH+](CCCC(=O)c3nc4ccccc4s3)CC2)cc1                                     | 5.7 | 6.4 | 5.7 |
| 291 | COc1c(OC)cc(CCC[NH+](Cc2ccc3c(OCO3)e2)CCc4ccc(OC)c(OC)c4)cc1OC                      | 5.7 | 6.2 | 5.7 |
| 292 | O=C1C=C(c2c(O1)cc(cc2OCCCC[NH+]3CCN(CC3)c4encn4)C)C                                 | 5.6 | 5.6 | 5.6 |
| 293 | Clc1ccc(c2c1C(=O)N3CC[NH2+]C[C@@H]23)CC                                             | 5.6 | 5.9 | 5.7 |
| 294 | FC(F)(F)c1cc(cc2c1C(=O)N3CC[NH2+]C[C@@H]23)C(C)C                                    | 5.6 | 6.2 | 5.7 |
| 295 | O=C(c1c(cc2c(c1OCCCC[NH+]3CCN(CC3)c4encn4)C(=CC(O2)=O)C)C)C                         | 5.5 | 6.0 | 5.5 |
| 296 | O=C1C2(NC(=O)N1)CC[NH+](CC2)CCCC(=O)c3c(OC)cc(OC)c(NS(=O)(=O)c4ccc<br>cc4)c3        | 5.5 | 5.8 | 5.5 |
| 297 | FC(F)(F)c1cccc2c1C(=O)N3CC[NH+](C[C@@H]23)C                                         | 5.4 | 6.2 | 6.1 |
| 298 | O=C(c1c(cc2c(c1OCCCC[NH+]3CCOCC3)C(=CC(O2)=O)C)C)C                                  | 5.4 | 5.0 | 5.3 |



|     |                                                    |     |     |     |
|-----|----------------------------------------------------|-----|-----|-----|
| 299 | <chem>[NH3+][C@H](Cc1c(OC)ccc(OC)c1)C</chem>       | 5.3 | 6.0 | 5.4 |
| 300 | <chem>Oc1ccc(N2CCC[NH+](CC2)C)c3c1NC(=O)CO3</chem> | 5.2 | 5.9 | 5.7 |

**Table S2.** SMILES, experimental and predicted (field and SVM)  $pK_i$  values of the molecules in the test set

| n  | smiles                                                                            | exp $pK_i$ | field $pK_i$ | SVM $pK_i$ |
|----|-----------------------------------------------------------------------------------|------------|--------------|------------|
| 1  | <chem>Clc1ccc(C(=O)N[C@H]2CCc3ccc(CC[NH+]4CCN(CC4)c5c6cccc6sn5)cc32)cc1</chem>    | 10.0       | 9.2          | 8.8        |
| 2  | <chem>O=S(=O)(NC1CCC(CC1)CC[NH+]2CCN(CC2)c3c4cccc4sn3)c5cccs5</chem>              | 9.5        | 8.9          | 8.6        |
| 3  | <chem>Clc1ccc2c(snc2N3CC[NH+](CC4CCC(CC4)CNC(=O)c5ccco5)CC3)c1</chem>             | 9.5        | 9.3          | 9.0        |
| 4  | <chem>O=C(N(C(C)C)C(C)C)NC1CCC(CC[NH+]2CCN(CC2)c3c4cccc4sn3)CC1</chem>            | 9.4        | 8.7          | 8.8        |
| 5  | <chem>O=C(N[C@H]1CCc2ccc(CC[NH+]3CCN(CC3)c4c5cccc5sn4)cc21)c6cccc6</chem>         | 9.3        | 9.5          | 9.5        |
| 6  | <chem>Clc1ccc(S(=O)(=O)C2(F)CC[NH+](CC2)CCc3ccc(F)cc3F)cc1</chem>                 | 9.2        | 8.2          | 8.3        |
| 7  | <chem>Clc1cccc(N2CC[NH+](CCCCOc3ccc4c(NC(=O)CC4)n3)CC2)c1C(F)(F)F</chem>          | 8.9        | 8.4          | 8.4        |
| 8  | <chem>Fc1ccc2c(onc2C3CC[NH+](CCCNS(=O)(=O)c4csc5cccc54)CC3)c1</chem>              | 8.8        | 8.7          | 8.8        |
| 9  | <chem>Fc1ccc(C(=O)CCC[NH+]2CC[C@H]3c4cccc5c4N([C@H]3CC2)CCN5C)cc1</chem>          | 8.8        | 8.7          | 8.6        |
| 10 | <chem>Fc1ccc2c(onc2C3CC[NH+](CC3)CCCCNS(=O)(=O)c4cccc(c4)C)c1</chem>              | 8.7        | 9.1          | 9.0        |
| 11 | <chem>[NH3+][C@@H](Cc1c(OC)cc(CCCCC)c(OC)c1)C</chem>                              | 8.6        | 7.6          | 7.6        |
| 12 | <chem>Fc1cc(F)ccc1CC[NH+]2CCC3(CC2)Cc4cccc4CC3</chem>                             | 8.5        | 8.3          | 8.3        |
| 13 | <chem>Fc1ccc(C(=O)CCC[NH+]2CC[C@H]3[C@H](C2)c4cc(OC)cc5c4N3CCN5C)cc1</chem>       | 8.5        | 7.8          | 8.1        |
| 14 | <chem>O=C(CCC[NH+]1Cc2cccc2CC1)c3cccc3</chem>                                     | 8.4        | 8.0          | 7.9        |
| 15 | <chem>Fc1ccc(C(=O)CCC[NH+]2CC[C@H]3[C@H](C2)c4cccc5c4N3CCN5C)cc1</chem>           | 8.3        | 8.1          | 8.1        |
| 16 | <chem>O=C(Nc1ccc(OC)c(NCC[NH+](C)C)c1)c2ccc(-c3ccc(cc3C)-c4noc(n4)C)cc2</chem>    | 8.3        | 7.7          | 8.1        |
| 17 | <chem>Clc1c(Cl)cccc1N2CC[NH+](CC2)CCc3cn(nn3)-c4ccn5c(c4)ccn5</chem>              | 8.3        | 8.3          | 8.3        |
| 18 | <chem>O=S(=O)(NCCCC[NH+]1CCN(CC1)c2c3cccc3sn2)c4cccs4</chem>                      | 8.3        | 9.0          | 8.2        |
| 19 | <chem>Fc1ccc(C(=O)CCC[NH+]2CC[C@H]3[C@H](C2)c4cccc5c4N3[C@@H](CN5C)C)cc1</chem>   | 8.2        | 8.6          | 8.4        |
| 20 | <chem>Clc1c(Cl)cccc1N2CC[NH+](CC2)CCCC(=O)Nc3ccn4c(c(cn4)C=O)c3</chem>            | 8.2        | 7.7          | 7.8        |
| 21 | <chem>Fc1ccc2c(onc2C3CC[NH+](C[C@H]4CC(=O)c5cc(oc5C4)-c6cccc6)CC3)c1</chem>       | 8.2        | 8.7          | 8.6        |
| 22 | <chem>Clc1c(Cl)cccc1N2CC[NH+](CCCCNC(=O)c3c(n(nn3)Cc4cccc4)C)CC2</chem>           | 8.1        | 8.1          | 8.0        |
| 23 | <chem>Fc1cccc1S(=O)(=O)c2enc(/C=C/c3ccc(F)cc3C)cc2</chem>                         | 8.1        | 7.4          | 7.5        |
| 24 | <chem>Clc1c(F)ccc(S(=O)(=O)NCCCC[NH+]2CCC(CC2)c3c4ccc(F)cc4on3)c1</chem>          | 8.1        | 7.0          | 7.1        |
| 25 | <chem>Clc1ccc2c(sc(S(=O)(=O)NCCCC[NH+]3CCN(CC3)c4c5cccc5sn4)c2)c1</chem>          | 8.0        | 8.0          | 8.2        |
| 26 | <chem>[NH3+][C@@H](Cc1c(OC)cc(CCCc2cccc2)c(OC)c1)C</chem>                         | 8.0        | 7.9          | 8.0        |
| 27 | <chem>Fc1cccc(N2CC[NH+](CC2)CCCCNC(=O)c3cc4cccc4cn3)c1</chem>                     | 8.0        | 7.5          | 7.8        |
| 28 | <chem>O=S(=O)(NCCCC[NH+]1CCN(CC1)c2c3cccc3sn2)c4cnc5cccn54</chem>                 | 7.9        | 7.3          | 7.4        |
| 29 | <chem>Clc1ccc2c(ccc(S(=O)(=O)NCCCC[NH+]3CCN(CC3)c4c5cccc5sn4)c2)c1</chem>         | 7.9        | 7.7          | 7.7        |
| 30 | <chem>Fc1ccc(C(=O)CCC[NH+]2Cc3cccc3CC2)cc1</chem>                                 | 7.9        | 7.7          | 7.7        |
| 31 | <chem>O=C(Nc1ccc(OC)c(N2CC[NH+](CC2)C)c1)c3ccc(-c4ccc(cc4C)-c5noc(n5)C)cc3</chem> | 7.8        | 8.0          | 7.7        |
| 32 | <chem>Fc1ccc(C(=O)C2CC[NH+](C[C@@H]3CC(=O)c4ccc(OC)cc4C3)CC2)cc1</chem>           | 7.8        | 8.2          | 8.6        |
| 33 | <chem>O=C(NCCCC[NH+]1CCN(CC1)c2ccc(O)cc2)c3cc4cccc4cn3</chem>                     | 7.8        | 8.3          | 8.2        |
| 34 | <chem>Fc1ccc(C(=O)CCC[NH+]2CC[C@H]3c4cccc5c4N([C@H]3CC2)CCN5C)cc1</chem>          | 7.8        | 7.8          | 7.8        |
| 35 | <chem>O=S(=O)(N1CCC[C@@H]1CC[NH+]2CCN(CC2)c3c4cccc4sn3)c5cccc6cnccc65</chem>      | 7.7        | 7.5          | 7.6        |
| 36 | <chem>Fc1ccc2c(onc2C3CC[NH+](CC3)C[C@H]4CC(=O)c5c(oc(n5)C)C4)c1</chem>            | 7.7        | 8.1          | 7.9        |
| 37 | <chem>Ic1c(OC)cc(C[C@@H]([NH3+])C)c(OC)c1</chem>                                  | 7.6        | 6.8          | 6.7        |
| 38 | <chem>Fc1ccc2c(onc2C3CC[NH+](C[C@@H]4CC(=O)c5ccc(cc5C4)C(=O)C)CC3)c1</chem>       | 7.5        | 8.0          | 7.6        |
| 39 | <chem>Fc1ccc2c([nH]cc2C3=CC[NH+](CC3)C[C@@H]4CC(=O)c5c(nc(s5)N6CCCC6)C4)c1</chem> | 7.4        | 7.8          | 7.9        |
| 40 | <chem>Brc1cccc1Cn2c(CCC)c(nn2)C(=O)NCCCC[NH+]3CCN(CC3)c4cccc4OC</chem>            | 7.4        | 7.5          | 7.4        |
| 41 | <chem>O=C1CCc2ccc(OCCCC[NH+]3CCN(CC3)c4cccc4C)nc2N1</chem>                        | 7.3        | 7.7          | 7.7        |
| 42 | <chem>Fc1cc2c(N(CC2)C[C@@H]([NH3+])C)cc1SCC</chem>                                | 7.2        | 6.9          | 7.1        |

|    |                                                                               |     |     |     |
|----|-------------------------------------------------------------------------------|-----|-----|-----|
| 43 | Clc1ccc2c(sc(S(=O)(=O)NCCC[NH+]3CCN(CC3)c4c5ccccc5on4)c2)c1                   | 7.2 | 7.3 | 7.2 |
| 44 | FC(F)(F)c1cc2c(CCN2C(=O)Nc3cccc(c3)-c4cnccc4)cc1SC                            | 7.1 | 6.6 | 7.0 |
| 45 | Clc1ccc2c([NH+]=C(N3CCN(C4CCCC4)CC3)c5ccnc5O2)c1                              | 7.0 | 6.9 | 7.0 |
| 46 | Clc1ccc(C2(O)CC[NH+](CC2)CCSe3ccc(F)cc3)cc1                                   | 7.0 | 8.0 | 8.0 |
| 47 | Clc1cc2c(CCN2C(=O)Nc3cnc(Oc4c(Cl)nccc4)cc3)cc1C                               | 7.0 | 6.4 | 6.5 |
| 48 | Oc1ccc2c(Cc3ccccc3[C@H]2C[NH3+])c1                                            | 7.0 | 7.1 | 7.1 |
| 49 | FC(F)(F)c1c(OC)cc2c(N(CC2)C(=O)Nc3cc(F)cc(-c4cnccc4)c3)c1                     | 6.9 | 6.9 | 7.2 |
| 50 | Clc1ccc2c([NH+]=C(N3CCNCC3)c4ccnc4O2)c1                                       | 6.9 | 6.2 | 6.4 |
| 51 | Fe1cc(F)ccc1CC[NH+]2CCC3(CC2)CC(=O)c4cc(ccc4O3)C#N                            | 6.8 | 7.6 | 7.5 |
| 52 | Clc1cc2c(CCN2C(=O)Nc3cnc(Oc4ccnc4C)cc3)cc1C                                   | 6.8 | 6.4 | 6.4 |
| 53 | O=C(NCCCC[NH+]1CCN(CC1)c2cccc(OC)c2)c3cccn3                                   | 6.8 | 7.5 | 7.6 |
| 54 | Clc1cc2c(CCN2C(=O)Nc3cnc(Oc4ccnc4CC)cc3)cc1C                                  | 6.7 | 6.7 | 6.5 |
| 55 | FC(F)(F)c1cc2c(CCN2C(=O)Nc3cccc(c3)-c4cnccc4)cc1OC                            | 6.7 | 7.0 | 7.2 |
| 56 | OCc1cc2c(OCCCC[NH+]3CCN(CC3)c4ccccc4OC)ccn2n1                                 | 6.6 | 7.1 | 7.5 |
| 57 | Clc1cc(F)ccc1[C@H]2C[C@@H]2C[NH3+]                                            | 6.6 | 6.4 | 6.6 |
| 58 | Clc1ccc(C2(O)CC[NH+](CC2)CCc3ccc(F)cc3)cc1                                    | 6.5 | 7.5 | 7.3 |
| 59 | Fe1ccc(OCCC[NH+]2Cc3ccccc3CC2)cc1                                             | 6.5 | 7.2 | 7.4 |
| 60 | O=C1c2ccc(cc2N3CC[NH2+]CC[C@H]3N1)C                                           | 6.4 | 6.4 | 6.9 |
| 61 | FC1(CC[NH+](C[C@@H]2CC[C@@]3(C2)c4ccccc4Oc5ccccc5C3)CC1)C([O-])=O             | 6.4 | 6.9 | 7.0 |
| 62 | FC(F)(F)c1cc(cc2c1C(=O)N3CC[NH2+]C[C@@H]23)CC                                 | 6.4 | 5.8 | 5.7 |
| 63 | O=S(=O)(n1cc2C=C(Oc3cccc1c32)C[NH+](C)C)c4ccccc5ccccc54                       | 6.3 | 5.7 | 5.6 |
| 64 | Clc1ccc(N2CC[NH+](CCCC(=O)c3nc4ccccc4s3)CC2)cc1                               | 6.3 | 6.9 | 6.9 |
| 65 | Clc1c(Cl)ccc(C2=CCN(c3ccc(OC)c(OCC[NH+]4CCCC4)c3)C2=O)c1                      | 6.2 | 5.8 | 5.6 |
| 66 | FC(F)(F)c1c(cc2CCN(c2c1)C(=O)Nc3cnc(OCc4cccn4)cc3)C                           | 6.2 | 7.1 | 7.1 |
| 67 | Br1ccccc1[C@@H]2C[C@@H]2C[NH3+]                                               | 6.2 | 6.5 | 6.4 |
| 68 | Clc1ccc(S(=O)(=O)Nc2c(OC)cc(OC)c(C(=O)CCCC[NH+]3CCC4(CC3)C(=O)NC(=O)N4)c2)cc1 | 6.1 | 5.9 | 6.1 |
| 69 | O=C1C=C(Oc2c1cccc2-c3ccccc3)N4CCOCC4                                          | 6.1 | 6.5 | 7.0 |
| 70 | C[NH+]1CCc2c(OC)c(OC)c3-c4cc(OC)c(OC)cc4C[C@@H]1c32                           | 6.0 | 7.4 | 7.1 |
| 71 | [NH3+][C@H](Cn1ccc2ccc3cnccc3c21)C                                            | 6.0 | 6.7 | 6.7 |
| 72 | Clc1ccc(c2C(=O)N3CC[NH2+]C[C@@H]3c12)C(F)(F)F                                 | 5.8 | 6.1 | 6.4 |
| 73 | Clc1c(OC)cc2C(=O)N3CC[NH2+]C[C@H]3c2c1                                        | 5.8 | 6.9 | 7.0 |
| 74 | FC(F)(F)c1cc(OCC)cc2c1C(=O)N3CC[NH2+]C[C@@H]23                                | 5.4 | 5.8 | 5.8 |
| 75 | O=C1C=C(c2c(O1)cc(cc2OCCC[NH+]3CCN(CC3)c4cnccn4)C)C                           | 5.3 | 5.5 | 5.7 |

**Table S3.** Name of NPS molecules, experimental pEC<sub>50</sub> and predicted (field and SVM) pK<sub>i</sub> values.

| molecules      | pEC <sub>50</sub> measured <sup>1</sup> | pK <sub>i</sub> from Field model | pK <sub>i</sub> from SVM model |
|----------------|-----------------------------------------|----------------------------------|--------------------------------|
| 25C-NBOH       | 9.05                                    | 8.0                              | 7.9                            |
| 25E-NBOMe      | 9.03                                    | 8.2                              | 8.3                            |
| 25D-NBOMe      | 8.90                                    | 8.5                              | 8.5                            |
| 25I-NBOMe      | 8.89                                    | 7.8                              | 7.9                            |
| 25I-NBOH       | 8.82                                    | 8.1                              | 8.1                            |
| 25C-NBOMe      | 8.74                                    | 8.8                              | 8.7                            |
| 25B-NBOMe      | 8.64                                    | 8.1                              | 8.0                            |
| BROMODRAGONFLY | 8.53                                    | 7.8                              | 8.0                            |
| DOB            | 8.41                                    | 7.3                              | 7.5                            |
| DOI            | 8.35                                    | 7.5                              | 7.5                            |
| 2C-T-7         | 8.24                                    | 8.0                              | 7.9                            |

|                |      |     |     |
|----------------|------|-----|-----|
| 2C-I           | 8.23 | 7.2 | 7.3 |
| 2C-T-2         | 8.19 | 7.3 | 7.5 |
| 2C-E           | 8.16 | 7.2 | 7.4 |
| DOET           | 8.11 | 7.2 | 7.4 |
| DOC            | 8.09 | 7.1 | 7.3 |
| 2C-B-FLY       | 8.09 | 7.1 | 7.3 |
| 2C-B           | 8.04 | 7.4 | 7.3 |
| 25H-NBOH       | 7.89 | 7.5 | 7.4 |
| 25H-NBOMe      | 7.89 | 7.7 | 8.0 |
| 2C-C           | 7.73 | 7.1 | 7.0 |
| 2C-D           | 7.36 | 7.6 | 7.2 |
| DOM            | 7.36 | 7.3 | 7.3 |
| 25H-NBMD       | 6.81 | 7.2 | 7.1 |
| 25H-NBF        | 6.41 | 6.6 | 6.4 |
| $\beta$ -k-2CB | 6.04 | 6.5 | 6.7 |
| 2C-H           | 5.62 | 6.1 | 5.9 |
| DOH            | 5.55 | 6.5 | 6.5 |
| N-Me-2C-H      | 5.35 | 6.5 | 6.5 |

**Table S4.** Calculated  $\text{field}pK_i$ ,  $\text{SVM}pK_i$  and  $\text{mean}pK_i$  for the natural products screening

| n  | name                | smiles                                                                                           | $\text{field}pK_i$ | $\text{SVM}pK_i$ | $\text{mean}pK_i$ |
|----|---------------------|--------------------------------------------------------------------------------------------------|--------------------|------------------|-------------------|
| 1  | ZINC08856435        | <chem>Oc1cc(OC/C=C/c2ccccc2)ccc1-c3c(c([nH]n3)C)-c4ccc(OC)cc4</chem>                             | 9.1                | 9.2              | 9.15              |
| 2  | ZINC00006368        | <chem>Cc1ccc2c(c1O)-c1ccccc3c1[C@@H](C2)N(C)CC3</chem>                                           | 8.9                | 9.0              | 8.95              |
| 3  | ZINC11867629        | <chem>Fe1c(F)c(COc2ccc3c(c(c(o3)-c4ccccc4)C(OCC)=O)c2)c(F)c(F)c1N5CC[NH2+][CC5</chem>            | 9.0                | 8.9              | 8.95              |
| 4  | ZINC72116881        | <chem>COc1c(OCc2ccccc2)cc2c3c1-c1cc4c(cc1C[C@@H]3N(C)CC2)OCO4</chem>                             | 8.7                | 9.0              | 8.90              |
| 5  | ZINC00607997        | <chem>COc1cc2c(cc1OC)CN1CCc3cc(OC)c(OC)cc3[C@@H]1C2</chem>                                       | 9.0                | 8.8              | 8.90              |
| 6  | ZINC68576530        | <chem>Clc1ccc(Cl)nc1C(OCC[N+](CCCCCCCCCCC)(C)C)=O</chem>                                         | 8.7                | 8.8              | 8.75              |
| 7  | ZINC12660071        | <chem>O=S1(=O)CC[C@@](NC(=O)CCCCC[C@@H]2C(=O)CC[C@H]2/C=C/[C@@H](O)CCCC)(C1)C</chem>             | 9.0                | 8.2              | 8.60              |
| 8  | ZINC13690010        | <chem>O=C(OC)c1c(NC(=O)c2cc3ccccc(OC)c3o2)c4ccc(OC)cc4[nH]1</chem>                               | 8.9                | 8.2              | 8.55              |
| 9  | ZINC05219478        | <chem>Oc1cc(OCc2ccccc2)ccc1-c3c(c([nH]n3)C)-c4ccc(OC)cc4</chem>                                  | 8.7                | 8.4              | 8.55              |
| 10 | ZINC09187792        | <chem>Clc1ccccc1COc2ccc(-c3c(-c4ccc(OC)c(OC)c4)c([nH]n3)C)c(O)c2</chem>                          | 8.6                | 8.5              | 8.55              |
| 11 | 12190               | <chem>Fe1ccccc1C[NH+](C[C@@H]2C=C([C@@H]1[C[C@H]2C(C)C)Cc3nc4ccccc(c4[nH]3)C)C)Cc5ccccc5F</chem> | 8.9                | 8.1              | 8.50              |
| 12 | ZINC09410825        | <chem>FC(F)(F)c1c(c(n[nH]1)-c2ccc(OCc3ccc(cc3)C)cc2O)-c4ccc(OC)c(OC)c4</chem>                    | 8.5                | 8.5              | 8.50              |
| 13 | MolPort-006-334-884 | <chem>Clc1ccccc1N2C(=O)C[C@@H](N3CCc4c([nH]c5ccc(OC)cc54)C3)C2=O</chem>                          | 8.5                | 8.5              | 8.50              |
| 14 | ZINC39354033        | <chem>Oc1cc(OCC[NH+]2CCN(CC2)c3ccccc3)ccc1-c4c(-c5ccc(OC)cc5)c(n[nH]4)C</chem>                   | 8.5                | 8.4              | 8.45              |
| 15 | ZINC20591088        | <chem>Oc1cc(OCCN2CC[NH+](CC2)Cc3ccccc3)ccc1-c4c(-c5ccc(OC)cc5)c(n[nH]4)C</chem>                  | 8.5                | 8.4              | 8.45              |
| 16 | ZINC09130703        | <chem>Clc1ccccc1COc2ccc(-c3c(c([nH]n3)C)-c4ccc(OC)cc4)c(O)c2</chem>                              | 8.4                | 8.5              | 8.45              |
| 17 | ZINC05343552        | <chem>Oc1cc(OCC=C(C)C)ccc1-c2c(c([nH]n2)C)-c3ccc(OC)cc3</chem>                                   | 8.4                | 8.4              | 8.40              |
| 18 | ZINC16036365        | <chem>O[C@H](CCCC)/C=C/[C@H]1CCC(=O)[C@H]1CCCCCCC(OCC[NH+]2CCCC[C@H]2c3ncccc3)=O</chem>          | 8.3                | 8.5              | 8.40              |
| 19 | ZINC09187797        | <chem>Clc1ccccc1c1COc2ccc(-c3c(-c4ccc(OC)c(OC)c4)c([nH]n3)C)c(O)c2</chem>                        | 8.4                | 8.3              | 8.35              |
| 20 | 157207-88-0         | <chem>N1(CC[C@H]2c3c(CCN2)c4ccccc4[nH]3)CCCC=CCCC1</chem>                                        | 8.4                | 8.3              | 8.35              |
| 21 | ZINC09418544        | <chem>Oc1c(-c2c(c([nH]n2)C)-c3ccc(OC)cc3)ccc(OCC[NH+]4CCC(CC4)C(=O)N)c1C</chem>                  | 8.3                | 8.4              | 8.35              |
| 22 | ZINC09130113        | <chem>Brc1ccc(COc2ccc(-c3c(c([nH]n3)C)-c4ccc(OC)cc4)c(O)c2)cc1</chem>                            | 8.3                | 8.4              | 8.35              |
| 23 | MolPort-002-530-410 | <chem>OC1=C([C@H]2c3c(CCN2)c4ccccc4[nH]3)C(=O)N(Cc5ccc(OC)cc5)C(=O)N1</chem>                     | 8.5                | 8.2              | 8.35              |

|    |                     |                                                                                             |     |     |      |
|----|---------------------|---------------------------------------------------------------------------------------------|-----|-----|------|
| 24 | SN00009552          | O=C(c1c(OC)cc(OC)cc1OC)/C=C\c2ccc(OCc3ccccc3)c(OC)c2                                        | 8.5 | 8.2 | 8.35 |
| 25 | ZINC09130734        | Oc1cc(OCc2ccc(cc2)C=C)ccc1-c3c(-c4ccc(OC)c(OC)c4)c([nH]n3)C                                 | 8.4 | 8.2 | 8.30 |
| 26 | ZINC09409677        | Oc1cc(OCc2ccccc2C)ccc1-c3c(-c4ccc(OC)c(OC)c4)c([nH]n3)C                                     | 8.4 | 8.2 | 8.30 |
| 27 | ZINC08791003        | O=C(NCCCC[NH+](C)C)CCC=1C(Oe2c(C1C)ccc(OC)c2C)=O                                            | 8.4 | 8.2 | 8.30 |
| 28 | ZINC09130659        | FC(F)(F)c1c(-c2ccc(OC)cc2)c(n[nH]1)-c3ccc(OCc4ccccc4F)cc3O                                  | 8.4 | 8.1 | 8.25 |
| 29 | 6932                | O[C@@H]1C[C@@H]([NH+](C1)Cc2c3ccccc3o2)c4nc(no4)-c5ccccc5)C                                 | 8.3 | 8.2 | 8.25 |
| 30 | ZINC08972988        | Clc1ccc(COe2ccc(-c3c(c([nH]n3)C)-c4ccc(OC)cc4)c(O)c2)cc1                                    | 8.3 | 8.2 | 8.25 |
| 31 | SN00149601          | Oc1cc(OCc2ccc(cc2)C=C)ccc1-c3c(-c4ccc(OC)c(OC)c4)c(no3)C                                    | 8.3 | 8.2 | 8.25 |
| 32 | SN00061787          | O=C(Nc1ccc2c(c3ccccc3n2CC)c1)CCC=4C(Oc5cc6c(cc5C4C)c(C)c6)=O                                | 8.3 | 8.1 | 8.20 |
| 33 | ZINC09129618        | Clc1ccc(COe2ccc(-c3c(c([nH]n3)C)-c4ccc(OC)cc4)c(O)c2)cc1Cl                                  | 8.3 | 8.1 | 8.20 |
| 34 | ZINC08973292        | FC(F)(F)c1c(-c2ccc(OC)cc2)c(n[nH]1)-c3ccc(OCC(C)=C)cc3O                                     | 8.2 | 8.2 | 8.20 |
| 35 | ZINC09187780        | FC(F)(F)c1c(-c2ccc(OC)cc2)c(n[nH]1)-c3ccc(OCc4ccccc4)cc3O                                   | 8.2 | 8.2 | 8.20 |
| 36 | ZINC68572101        | Clc1ccc(Cc2c(N=C/c3ccc(cc3)C)n[nH]c2/N=C/c4ccc(cc4)C)cc1                                    | 8.2 | 8.2 | 8.20 |
| 37 | MolPort-001-016-686 | O=C(Nc1c(OC)cc2c(oc3ccccc32)c1)c4cc(OC)cc(OC)c4                                             | 8.1 | 8.3 | 8.20 |
| 38 | ZINC08973452        | Fe1ccc(COe2ccc(-c3c(c([nH]n3)C)-c4ccc(OC)cc4)c(O)c2)cc1                                     | 8.1 | 8.3 | 8.20 |
| 39 | MolPort-002-535-647 | O=C1c2c(OC)c(OC)ccc2-c3c4c(c5cc(O[C@H](C(=O)Nc6c(OC)ccc(OC)c6)C)ccc5n14)ccn3                | 8.3 | 8.0 | 8.15 |
| 40 | ZINC09410789        | FC(F)(F)c1c(c(n[nH]1)-c2ccc(OCc3ccccc3F)cc2O)-c4ccc(OC)c(OC)c4                              | 8.1 | 8.2 | 8.15 |
| 41 | MolPort-027-852-775 | Clc1ccc(-c2c([C@H](NC(=O)c3cc(n(n3)C)C)C)c(on2)C(O)=O)cc1                                   | 8.1 | 8.2 | 8.15 |
| 42 | ZINC09409653        | Brc1ccc(COe2ccc(-c3c(-c4ccc(OC)c(OC)c4)c([nH]n3)C)c(O)c2)cc1                                | 8.1 | 8.2 | 8.15 |
| 43 | MolPort-001-738-042 | O=C1CN(C(=O)[C@@H]2Cc3c4ccccc4[nH]c3[C@@H](N12)c5ccccc5OC)CCc6ccc(OC)c(OC)c6                | 8.1 | 8.2 | 8.15 |
| 44 | SN00148291          | Oc1cc(OCc2ccccc2)ccc1-c3c(-c4ccc(OC)c(OC)c4)c(no3)C                                         | 7.9 | 8.3 | 8.10 |
| 45 | ZINC20466733        | Fe1ccccc1(C(=O)N[C@@H]2CC[C@@]3(CC[C@H]([C@H](O)[C@@H]3[C@H]2C)[C@H](C(=O)N4CCCC4)C)C)c1    | 8.1 | 8.1 | 8.10 |
| 46 | SN00147982          | Oc1cc(OCc2ccc(cc2)C)ccc1-c3c(-c4ccc(OC)cc4)c(no3)C                                          | 8.0 | 8.2 | 8.10 |
| 47 | ZINC04235438        | OC=1c2ccccc2N(C(=O)C1C(=O)C[C@H]([NH2+][C-]3C(=O)N(N(C3C)C)c4ccccc4)c5ccc(N(C)C)cc5)C       | 8.2 | 7.9 | 8.05 |
| 48 | ZINC02098147        | O=C1C2=C([C@@H](N1CCc3ccc(OC)c(OC)c3)c4ccc(O)cc4)C(=O)c5cc(c(cc5O2)C)C                      | 8.0 | 8.1 | 8.05 |
| 49 | ZINC20411284        | O[C@@H](CCCC)/C=C/[C@@H]1CCC(=O)[C@H]1CCCCCCC(=O)NCC[NH+]2CCOCC2                            | 8.0 | 8.1 | 8.05 |
| 50 | ZINC09410809        | FC(F)(F)c1c(c(n[nH]1)-c2ccc(OCc3ccc(F)cc3)cc2O)-c4ccc(OC)c(OC)c4                            | 8.1 | 7.9 | 8.00 |
| 51 | ZINC09421984        | O=C1c2ccc(OC(=O)c3cccs3)c(c2O)/C1=C/c4cn(c5ccccc5)CC)C                                      | 8.1 | 7.9 | 8.00 |
| 52 | ZINC70672992        | Clc1ccc(OCC#C[C@@H]2c3c(OC)c4c(OCO4)cc3CC[NH+]2C)c(c1)C=C5C(=O)N(C(=O)N(C5=O)C)C            | 8.0 | 8.0 | 8.00 |
| 53 | ZINC11866356        | Clc1ccccc1c1COe2ccc(-c3c(-c4ccc(OC)cc4)c(no3)C)c(O)c2                                       | 8.0 | 8.0 | 8.00 |
| 54 | ZINC01780045        | Clc1ccccc1COe2ccc3c(OC(=C(c4ccccc4OC)C3=O)C(F)(F)F)c2)c1                                    | 7.9 | 8.1 | 8.00 |
| 55 | ZINC11866343        | Fe1ccccc1COe2ccc(-c3c(-c4ccc(OC)c(OC)c4)c(no3)C)c(O)c2                                      | 7.8 | 8.2 | 8.00 |
| 56 | ZINC09186350        | Clc1ccc(COe2ccc(-c3c(-c4ccc(OC)c(OC)c4)c(no3)C)c(O)c2)cc1                                   | 7.8 | 8.2 | 8.00 |
| 57 | MolPort-002-511-872 | O=C1C2=C(N(C(=O)N1C)C)N=C3c4ccccc4C(OC(=O)CC)=C3[C@@H]2c5ccc(OC)cc5                         | 8.0 | 7.9 | 7.95 |
| 58 | ZINC02122370        | O=C(NCCc1ccc(OC)cc1)c2cc3c4ccccc4[nH]c3c(n2)-c5ccc(OC)c(OC)c5                               | 8.0 | 7.9 | 7.95 |
| 59 | ZINC09409699        | Clc1cc(F)ccc1COe2ccc(-c3c(c([nH]n3)C)-c4ccc(OC)cc4)c(O)c2                                   | 8.0 | 7.9 | 7.95 |
| 60 | ZINC02429597        | Fe1c(F)c(F)c(F)c(COe2ccc3c(c(c(n3)C)C)(OCCOC)=O)c2)c1F                                      | 7.9 | 8.0 | 7.95 |
| 61 | MolPort-000-424-288 | Brc1cc2c(c(c(o2)C)C(OCCOC)=O)cc1OCc3ccc(cc3)C=C                                             | 7.9 | 8.0 | 7.95 |
| 62 | ZINC11866321        | Clc1ccccc1c1COe2ccc(-c3c(-c4ccc(OC)c(OC)c4)c(no3)C)c(O)c2                                   | 7.9 | 8.0 | 7.95 |
| 63 | ZINC08972974        | Oc1cc(OCC)ccc1-c2c(c([nH]n2)C)-c3ccc(OC)cc3                                                 | 7.9 | 8.0 | 7.95 |
| 64 | ZINC12898513        | O=C(NCC(C[NH+](C)C)(C)C)CC=1C(Oe2cc3c(c(co3)C)cc2C1C)=O                                     | 8.1 | 7.8 | 7.95 |
| 65 | 147293-04-7         | O[C@@H]([C@H]1[C@@H](O1)CCCCCCCC(OC)=O)/C=C\C/C=C/C                                         | 8.1 | 7.8 | 7.95 |
| 66 | SN00031093          | Fe1ccc(-c2cc(n(n2)C)[C@H]3C[NH+]4CC[C@H]3[C@H]4C[NH2+])Cc5ccccc5)cc1                        | 8.1 | 7.8 | 7.95 |
| 67 | ZINC02149559        | O=C1c2c(OC)c(OC)ccc2C=NN1CCOe3ccccc(OC)c3                                                   | 7.8 | 8.1 | 7.95 |
| 68 | ZINC03840589        | O[C@H]1[C@@H](CC[C@]2(Cc3c(nc(s3)Nc4c(OC)ccc(OC)c4)[C@H]([C@H]12)C)C)[C@H](C)(C(=O)N(CC=C)C | 7.8 | 8.1 | 7.95 |
| 69 | MolPort-002-518-881 | O=S(=O)(N[C@H](CCC)C(Oc1ccc-2c(OC(=O)c3ccc(OC)ccc32)c1)=O)c4ccc(cc4)C                       | 7.7 | 8.2 | 7.95 |

|     |                     |                                                                                       |     |     |      |
|-----|---------------------|---------------------------------------------------------------------------------------|-----|-----|------|
| 70  | ZINC05190540        | Oc1cc(OCe2ccccc2)ccc1-c3c(Oc4ccc(OC)cc4)c[nH]n3                                       | 8.1 | 7.7 | 7.90 |
| 71  | MolPort-009-649-103 | O=C(Nc1ccc2c([nH]c(n2)COC)c1)CCc3c[nH]c4ccccc43                                       | 8.0 | 7.8 | 7.90 |
| 72  | ZINC02319891        | O=C(OCC)c1e2cc(OCc3c(C)ccc(c3)C)ccc2oc1C(C)(C)C                                       | 8.0 | 7.8 | 7.90 |
| 73  | ZINC05572691        | Fe1ccccc1COe2ccc(-c3c(-c4ccc(OC)cc4)cnc(n3)N)c(O)c2                                   | 7.9 | 7.9 | 7.90 |
| 74  | ZINC08845645        | O=C(Nc1c(oc2ccccc21)C(=O)Nc3cccc(c3)C)c4cc(n[nH]4)-c5ccc(cc5O)C                       | 7.6 | 8.2 | 7.90 |
| 75  | ZINC02412441        | Clc1cccc(COe2ccc3c(OC(=C(c4ccc(OC)cc4)C3=O)C(F)(F)F)c2)c1                             | 8.0 | 7.7 | 7.85 |
| 76  | ZINC09129491        | FC(F)(F)c1c(-e2ccc(OC)cc2)c(n[nH]1)-c3ccc(OCc4ccc(F)cc4)cc3O                          | 7.9 | 7.8 | 7.85 |
| 77  | ZINC01322966        | O=C1c2ccc(OC(=O)c3cccc(OC)c3)cc2OC(=C1c4ccc(OC)c(OC)c4)C(OCC)=O                       | 7.9 | 7.8 | 7.85 |
| 78  | ZINC09409930        | FC(F)(F)c1c(c(n[nH]1)-e2ccc(OCc3ccccc3)cc2O)-c4ccc(OC)c(OC)c4                         | 7.9 | 7.8 | 7.85 |
| 79  | ZINC08791787        | O=C1c2ccccc2[C@@H]3N1[C@@H](C(S3)(C)C)C(=O)N[C@@H](C(C)C)C(=O)NCCCc4ccccc4            | 7.9 | 7.8 | 7.85 |
| 80  | ZINC48057077        | Oc1cccc(OC)c1C(=O)/C=C\c2cccc(OC)c2OC                                                 | 7.8 | 7.9 | 7.85 |
| 81  | ZINC04267171        | OC=1c2ccccc2N(C(=O)C1C(=O)C[C@@H]([NH2+])C=3C(=O)N(N(C3C)C)c4ccccc4)c5ccc6c(OCO6)c5)C | 7.8 | 7.9 | 7.85 |
| 82  | ZINC20466528        | O[C@@H]1[C@@H](CC[C@H]2(CC[C@H](NC(=O)C3CCCC3)[C@@H]([C@@H]12)C)C)[C@H](C(=O)NC4CC4)C | 7.8 | 7.9 | 7.85 |
| 83  | ZINC01792699        | Fe1c(F)c(F)c(F)c(COe2ccc3C=C(c4ccc5ccccc5n4)C(Oc3c2)=O)c1F                            | 7.8 | 7.9 | 7.85 |
| 84  | ZINC11866287        | Oc1cc(OCe2ccccc2C)ccc1-c3c(-c4ccc(OC)c(OC)c4)cnc(n3)N                                 | 7.8 | 7.9 | 7.85 |
| 85  | ZINC08970919        | Clc1cccc(Cl)c1COe2ccc(-c3c(-c4ccc(OC)c(OC)c4)c(no3)C)c(O)c2                           | 7.7 | 8.0 | 7.85 |
| 86  | SN00149108          | Clc1cccc(COe2ccc(-c3c(-c4ccc(OC)cc4)c(no3)C)c(O)c2)c1                                 | 7.7 | 8.0 | 7.85 |
| 87  | ZINC47284531        | Oc1c(c(OCC[NH+])2CCN(CC2)c3ccccc3)ccc1-c4c(-c5ccc(OC)cc5)c(n[nH]4)C)C                 | 7.6 | 8.1 | 7.85 |
| 88  | ZINC08996172        | Clc1cccc(COe2ccc(-c3c(Oc4ccc(OC)cc4)c[nH]n3)c(O)c2)c1                                 | 7.7 | 7.9 | 7.80 |
| 89  | ZINC03983996        | O[C@@]1(CC[C@H]2[C@H]3CC[C@@H]4CC(=O)CC[C@]4([C@@H]3CC[C@@]12)C)CSc5ncn5C             | 7.7 | 7.9 | 7.80 |
| 90  | ZINC12900696        | O=C1C(=C(c2c(OC)cc3c(CCC(O3)(C)C)c2O1)C)CC(=O)NCCc4c[nH]c5ccc(OC)cc54                 | 8.1 | 7.5 | 7.80 |
| 91  | ZINC04267149        | Clc1ccc([C@H]([NH2+])C=2C(=O)N(N(C2C)C)c3ccccc3)CC(=O)C=4C(=O)N(c5ccccc5C4O)C)cc1     | 8.0 | 7.6 | 7.80 |
| 92  | MolPort-035-700-739 | Oc1cc(C2=CC(=O)c3c(OC)cc4c([C@H](CC(O4)=O)C=5C(=O)Nc6ccccc6C5)c3O2)ccc1OC             | 7.8 | 7.8 | 7.80 |
| 93  | ZINC20759596        | OC1=C([C@H]2c3c(C[C@H](N2)CC)c4ccccc4[nH]3)C(=O)N(C(=O)N1Cc5ccc(OC)cc5                | 7.8 | 7.8 | 7.80 |
| 94  | ZINC11866347        | Oc1cc(OCe2c(C)ccc(c2)C)ccc1-c3c(-c4ccc(OC)c(OC)c4)c(no3)C                             | 7.8 | 7.8 | 7.80 |
| 95  | ZINC13571467        | O=C1C(/C(=N/CCc2ccc(OC)c(OC)c2)CC)=C([O-])CC(C1)(C)C                                  | 7.8 | 7.8 | 7.80 |
| 96  | ZINC09575415        | Bre1ccc(OC)c(/C=C\2C(=O)c3ccc(O)c(C[NH+](CC)CC)c3O2)c1                                | 7.8 | 7.8 | 7.80 |
| 97  | ZINC09410298        | Bre1ccc(COe2ccc(-c3c(-c4ccc(OC)c(OC)c4)c(no3)C)c(O)c2)cc1                             | 7.6 | 8.0 | 7.80 |
| 98  | ZINC02158608        | O=C1C(=C(c2cc3c(OCN(c4ccccc4C)C3)c(e2O1)C)C)Cc5ccccc5                                 | 7.6 | 8.0 | 7.80 |
| 99  | ZINC20760972        | O=C(N[C@H]([C@H](CC)C)C(OC)=O)CN1C=Nc2cc(OC)c(OC)cc2C1=O                              | 7.5 | 8.1 | 7.80 |
| 100 | SN00149302          | Clc1c(Cl)ccc(COe2ccc(-c3c(-c4ccc(OC)c(OC)c4)c(no3)C)c(O)c2)c1                         | 7.4 | 8.2 | 7.80 |
| 101 | ZINC02107196        | O=C1[C@H](c2c3ccccc3n(CCCC)c2)CC(=O)N1c4cccc(OC)c4                                    | 7.9 | 7.6 | 7.75 |
| 102 | MolPort-002-517-334 | O=C(N[C@@H](Cc1c[nH]c2ccccc21)C(O)=O)COc3ccc4c(OC(=O)C=5CCCCC45)c3                    | 7.9 | 7.6 | 7.75 |
| 103 | ZINC09130740        | FC(F)(F)c1c(c(n[nH]1)-c2ccc(OCc3ccccc3)cc2O)-c4ccc(OC)c(OC)c4                         | 7.8 | 7.7 | 7.75 |
| 104 | MolPort-027-852-794 | Fe1ccc(-c2c([C@H](NC(=O)c3cc(n(n3)C)C)C)c(on2)C(O)=O)cc1                              | 7.8 | 7.7 | 7.75 |
| 105 | ZINC19893649        | Clc1ccc(Cc2c(n[nH]c2/N=C/c3ccc(F)cc3)/N=C/c4ccc(F)cc4)cc1                             | 7.8 | 7.7 | 7.75 |
| 106 | ZINC01280062        | O=C(c1c(cc2C([C@@H](C(c2c1)(C)C)C)C)C)C[C@@H]3c4c(OC)c5c(OCO5)cc4CC[N+](3)(C)C        | 7.7 | 7.8 | 7.75 |
| 107 | ZINC09130747        | FC(F)(F)c1c(c(n[nH]1)-c2ccc(OCC(C)=C)cc2O)-c3ccc(OC)c(OC)c3                           | 7.7 | 7.8 | 7.75 |
| 108 | MolPort-046-594-356 | Oc1c(OC)cc2CCN([C@H](Cc3ccc(O)c(Oc4c(OC)cc5CCN([C@@H](c5e4)Cc6ccc(OC)cc6)C)c3)c2e1)C  | 7.7 | 7.8 | 7.75 |
| 109 | ZINC02667596        | Clc1c(Cl)cc(COe2ccc3c(OC(=C(c4ccccc4OC)C3=O)C)c2)cc1                                  | 7.7 | 7.8 | 7.75 |
| 110 | MolPort-000-826-974 | O=C(Nc1c(OC)cc2c(oc3ccccc32)c1)c4cccc(OC)c4                                           | 7.6 | 7.9 | 7.75 |
| 111 | ZINC02114178        | O=C1[C@@H]2Cc3c4ccccc4[nH]c3[C@@H](N2C(=O)CN1CCOC)c5ccccc5C                           | 7.6 | 7.9 | 7.75 |
| 112 | SN00382560          | Oc1c(OC)cc2CCN([C@H]3Cc4ccc(O)c(c4)-c5c(OC)ccc(C[C@@H]6c7cc(Oc1e23)c(OC)cc7CCN6C)c5)C | 7.6 | 7.9 | 7.75 |
| 113 | SN00151289          | Clc1cc(F)ccc1COe2ccc(-c3c(-c4ccc(OC)c(OC)c4)c(no3)C)c(O)c2                            | 7.6 | 7.9 | 7.75 |
| 114 | ZINC02147505        | O=C(OCC)CCC=1C(Oe2c(c(OCc3ccccc3)C)ccc2C1C)C=O                                        | 7.5 | 8.0 | 7.75 |
| 115 | SN00147957          | Fe1ccc(COe2ccc(-c3c(-c4ccc(OC)cc4)c(no3)C)c(O)c2)cc1                                  | 7.5 | 8.0 | 7.75 |

|     |                     |                                                                                                 |     |     |      |
|-----|---------------------|-------------------------------------------------------------------------------------------------|-----|-----|------|
| 116 | ZINC08792424        | O=C1c2c(OC)c(OC)ccc2-c3c4c(e5ccc(OCc6cccc(e6)C)ccc5n14)ccn3                                     | 7.7 | 7.7 | 7.70 |
| 117 | ZINC08789180        | O=C1CN(CCCOC)C(=O)C2(c3c([C@H](CN12)e4cccc(OC)e4OCC)e5cccc5[nH]3)C                              | 7.7 | 7.7 | 7.70 |
| 118 | ZINC70669913        | O=C1C=CC=C2[C@@H]3C[C@@H](C[NH+](CC4(Cc5ccc(OC)c(OC)cc5OC)C(=O)N(C(=O)N(C4=O)C)C3)CN12          | 7.7 | 7.7 | 7.70 |
| 119 | ZINC20611836        | OC1=C([C@H]2c3c(e4cccc4[nH]3)CCN2C)C(=O)NC(=O)N1c5ccc(OC)cc5                                    | 7.5 | 7.9 | 7.70 |
| 120 | ZINC05452205        | Fe1cccc1COe2ccc(-c3c(-c4ccc(OC)cc4)c(no3)C)c(O)e2                                               | 7.5 | 7.9 | 7.70 |
| 121 | ZINC02155319        | O=C1C2=C([C@H](N1CCe3ccc(OC)cc3)e4cccc(OC)e4)C(=O)e5cccc5O2                                     | 7.8 | 7.6 | 7.70 |
| 122 | MolPort-002-528-757 | O=C(N[C@@H](Cc1c[nH]c2ccc(O)cc21)C(O)=O)[C@@H](Oe3ccc4c(OC(=O)C=C4CC)c3)C                       | 7.8 | 7.6 | 7.70 |
| 123 | MolPort-001-737-511 | O=C1CN(CCCN(C)C)C(=O)[C@H]2Cc3c4cccc4[nH]c3[C@H](N12)e5ccc(C(C)C)cc5                            | 7.8 | 7.6 | 7.70 |
| 124 | 20164               | Clc1ccc(S(=O)(=O)Cc2nc3c(s2)C[C@@]4(CC[C@@H]([C@H](O)[C@H]4[C@H]3C)[C@@H](C(=O)N5CCOCC5)C)C)cc1 | 7.6 | 7.8 | 7.70 |
| 125 | MolPort-000-812-834 | Clc1cc2c(OC(=O)C(Cc3cccc3)=C2)cc1O[C@H](C(=O)N[C@@H](Cc4c[nH]c5ccc(O)cc54)C(O)=O)C              | 7.6 | 7.8 | 7.70 |
| 126 | ZINC03846610        | O=C(C[C@@H](Ne1cccc1)c2ccc(N(C)C)cc2)C=3C(=O)c4cccc4N(C3[O-])C                                  | 7.6 | 7.8 | 7.70 |
| 127 | 8159                | Fe1c(F)ccc(C[NH+])2CCC[C@H]2c3nc(no3)-c4ccc(F)cn4)c1                                            | 7.6 | 7.8 | 7.70 |
| 128 | ZINC13181151        | Oc1c(c(OCC[NH+])2C[C@@H](O[C@@H](C2)C)C)ccc1-c3c(-c4ccc(OC)cc4)c(n[nH]3)C)C                     | 7.9 | 7.4 | 7.65 |
| 129 | ZINC48057072        | Oc1cccc(OC)c1C(=O)/C=C/e2cc(OC)c(OC)cc2OC                                                       | 7.8 | 7.5 | 7.65 |
| 130 | MolPort-002-524-694 | O=C(NCc1ccc(OC)cc1)c2cc3c4cccc4[nH]e3c(n2)-c5cccc(OC)e5                                         | 7.8 | 7.5 | 7.65 |
| 131 | MolPort-002-520-663 | O=C(N[C@H](Cc1c[nH]e2cccc21)C(O)=O)CC=3C(Oc4c(e5c(cc4C3)c(c(o5)C)C)C)=O                         | 7.8 | 7.5 | 7.65 |
| 132 | ZINC31170105        | O[C@@](CC/C=C(/CO)C)/(C=C/C(C)=C/COe1ccc2C=CC(Oe2c1)=O)C                                        | 7.7 | 7.6 | 7.65 |
| 133 | 11064               | O[C@@H]1[C@H](O)[C@H]2[C@H](SC(=N2)Nc3cccc3)[C@H](C1)C(=O)Nc4cccc4OC                            | 7.6 | 7.7 | 7.65 |
| 134 | ZINC09410850        | Oc1cc(OCC[NH+])2CCC(CC2)C)ccc1-c3c(-c4ccc(OC)c(OC)e4)c([nH]n3)C                                 | 7.6 | 7.7 | 7.65 |
| 135 | ZINC17058595        | Oc1cc(OCC[NH+])2C[C@@H](O[C@@H](C2)C)C)ccc1-c3c(-c4ccc(OC)c(OC)e4)c(n[nH]3)C                    | 7.6 | 7.7 | 7.65 |
| 136 | ZINC00083643        | O=C(OCC)c1c(oc2ccc(OCc3c(C)ccc(c3)C)cc21)C                                                      | 7.6 | 7.7 | 7.65 |
| 137 | ZINC08790710        | O=C(NCCC[NH+](C)C)CCC=1C(Oe2c(c3c(cc2C1)C)c(o3)C)C)C)=O                                         | 7.6 | 7.7 | 7.65 |
| 138 | ZINC05156892        | Oc1cc(OCC)ccc1-c2c(-c3ccc(OC)c(OC)e3)c([nH]n2)C                                                 | 7.5 | 7.8 | 7.65 |
| 139 | MolPort-021-745-971 | O=C(N1CCe2c(C1)e3cccc3[nH]2)COe4ccc5c(OC(=O)C(=C5)C)e4                                          | 7.5 | 7.8 | 7.65 |
| 140 | ZINC04236981        | O[C@@H]1CC[C@@H]2[C@@]([C@@H](O)CC[C@@]2([C@@H]1CC(=O)N(CCCC)CCCC)C)C)O)C                       | 7.4 | 7.9 | 7.65 |
| 141 | ZINC04090087        | O=C(NCCCOC(C)C)CC=1C(Oe2cc(c3c(c(oc3e2C1)C)C)C)C)=O                                             | 7.9 | 7.3 | 7.60 |
| 142 | MolPort-002-530-479 | Clc1c(OCC(=O)N[C@@H](Cc2c[nH]c3ccc(O)cc32)C(O)=O)cc4c(C=5CCCC5C(O4)=O)c1                        | 7.7 | 7.5 | 7.60 |
| 143 | ZINC08993461        | O=S(Oc1ccc2C(=O)/C(Oe2c1C)=C\c3en(c4cccc34)CC)(=O)e5ccc(OC)cc5                                  | 7.6 | 7.6 | 7.60 |
| 144 | ZINC09059912        | Oc1c(-c2c(c([nH]n2)C)-c3ccc(OC)cc3)ccc(OCC[NH+])4CCCC4)c1C                                      | 7.6 | 7.6 | 7.60 |
| 145 | ZINC20466291        | O[C@@H]1[C@H](CC[C@]2(CC[C@@H](NC(=O)c3cccc3)[C@@H]([C@@H]12)C)C)[C@H](C(=O)N(CCC#N)C)C         | 7.6 | 7.6 | 7.60 |
| 146 | ZINC01321188        | Br1cccc1C(Oe2ccc3C(=O)C(c4ccc(OC)c(OC)e4)=C(Oc3e2)C(OCC)=O)=O                                   | 7.5 | 7.7 | 7.60 |
| 147 | ZINC79188720        | O=C(NCCc1c[nH]c2cccc21)Cc3en(c4cccc34)CCOC                                                      | 7.5 | 7.7 | 7.60 |
| 148 | ZINC09128884        | FC(F)(F)c1c(-c2ccc(OC)cc2)c(on1)-c3ccc(OCc4ccc(F)cc4)cc3O                                       | 7.5 | 7.7 | 7.60 |
| 149 | ZINC00627450        | O=S(=O)(N[C@H]([C@H](CC)C)C(Oc1ccc2c(OC(=O)C=3CCCC23)c1)=O)c4ccc(cc4)C                          | 7.5 | 7.7 | 7.60 |
| 150 | ZINC02147037        | O=S(=O)(N[C@H]([C@H](CC)C)C(Oc1cc(cc2e1C(=C(C(O2)=O)C)C)C)=O)c3ccc(cc3)C                        | 7.5 | 7.7 | 7.60 |
| 151 | ZINC08789652        | O=C1CN(C(=O)[C@@]2(c3c([C@H](CN12)e4ccc(OCCC)c(OC)e4)e5cccc5[nH]3)C)CCOC(C)C                    | 7.5 | 7.7 | 7.60 |
| 152 | 19285               | Clc1ccc(-c2c([C@H](NC(=O)c3cc(n3)C)C)C)c(on2)C([O-])=O)cc1                                      | 7.4 | 7.8 | 7.60 |
| 153 | MolPort-039-057-114 | Oc1ccc2c(oc3e2ne4c(e3-e5cc(OC)c(OC)c5)cnn4C)c1C                                                 | 7.3 | 7.9 | 7.60 |
| 154 | MolPort-002-518-975 | O=C1[C@H]2Cc3c4cccc4[nH]e3C(N2C(=O)N1c5c(OC)cc6c(e7cccc7o6)c5)(C)C                              | 7.7 | 7.4 | 7.55 |
| 155 | ZINC15675098        | Clc1cc(F)ccc1Cc2noc(n2)[C@@H]3C[C@H](O)C[NH+])3Cc4ccc(N(C)C)cc4                                 | 7.7 | 7.4 | 7.55 |
| 156 | 20512               | Fe1cc(F)cc(CNC(=O)[C@@H]([C@H]2CC[C@]3(CC[C@@H](NC(=O)Cc4cccc4)[C@H]([C@@H]3[C@H]2O)C)C)C)c1    | 7.4 | 7.7 | 7.55 |
| 157 | ZINC02316741        | O=C(OCC)c1e2cc(OCc3c(C)ccc(c3)C)ccc2oc1-c4ccc(OC)cc4                                            | 7.4 | 7.7 | 7.55 |
| 158 | SN00147842          | Oc1cc(OCCe2ccc(cc2)C=C)ccc1-c3c(-c4ccc(OC)cc4)c(no3)C                                           | 7.4 | 7.7 | 7.55 |
| 159 | SN00149300          | Fe1ccc(COe2ccc(-c3c(-c4ccc(OC)c(OC)e4)c(no3)C)c(O)e2)cc1                                        | 7.2 | 7.9 | 7.55 |
| 160 | ZINC72324873        | O=C1C(=C(c2c(OC)cc(OC)cc2O1)C)CC(=O)Nc3cccc4c3cc[nH]4                                           | 7.6 | 7.5 | 7.55 |

|     |                     |                                                                                                        |     |     |      |
|-----|---------------------|--------------------------------------------------------------------------------------------------------|-----|-----|------|
| 161 | SN00151276          | Oc1cc(OCe2ccccc2C)ccc1-c3c(-c4ccc(OC)c(OC)c4)c(no3)C                                                   | 7.6 | 7.5 | 7.55 |
| 162 | 144369-45-9         | O=C1C([C@@H]2CC[C@@H]([C@]2(CCOC(=O)C)C)[C@@H]/C=C/C(C)C)C=C[C@@H]3[C@]4(O3)C[C@@H](OC(=O)C)CC[C@@]14C | 7.5 | 7.6 | 7.55 |
| 163 | ZINC68592313        | O=P(OCC)(OCC)c1ccccc1OCCOS(=O)(=O)e2ccc(cc2)C                                                          | 7.5 | 7.6 | 7.55 |
| 164 | 6915                | Fe1ccc(C[NH+]2C[C@@H](O)C[C@H]2c3nc(no3)-c4cccc(c4)C)cc1                                               | 7.5 | 7.6 | 7.55 |
| 165 | ZINC02284233        | Fe1c(F)c(F)c(F)c(COe2ccc3c(c(c(o3)C(C)C)C(OCC)=O)e2)c1F                                                | 7.5 | 7.6 | 7.55 |
| 166 | 3205                | O[C@]1(C(=C[C@@H](OC(=O)CCCCC)[C@@H]2C(CC[C@@H](O)[C@]12C)(C)C)CO)CO                                   | 7.5 | 7.6 | 7.55 |
| 167 | ZINC09128858        | Clc1cc(Cl)ccc1COe2ccc(-c3c(-c4ccc(OC)c(OC)c4)c([nH]n3)C)c(O)e2                                         | 7.3 | 7.8 | 7.55 |
| 168 | SN00149096          | Clc1ccc(COe2ccc(-c3c(-c4ccc(OC)cc4)c(no3)C)c(O)e2)cc1                                                  | 7.3 | 7.8 | 7.55 |
| 169 | ZINC08918384        | O[C@@]12CCN(C[C@H]2CCCC1)C(=O)CCC=3C(Oe4c(c(OCc5ccccc5)C)ccc4C3C)C=O                                   | 7.7 | 7.3 | 7.50 |
| 170 | ZINC01322258        | O=C1c2ccc(OC(=O)c3ccccc3C)cc2OC(=C1c4ccc(OC)c(OC)c4)C(OCC)=O                                           | 7.6 | 7.4 | 7.50 |
| 171 | ZINC72324469        | O=C1C(=C(c2ccc(OC)c(OC)c2O1)C)CC(=O)Nc3cccc4c3cn4CCOC                                                  | 7.6 | 7.4 | 7.50 |
| 172 | ZINC03846553        | Oc1ccccc1[C@H](Nc2ccc(OC)cc2)CC(=O)C=3C(=O)c4ccccc4N(C3[O-])C                                          | 7.6 | 7.4 | 7.50 |
| 173 | SN00278139          | O=C1c2ccc(O)c(-c3c(OC)ccc(C[C@H]4c5c(Oc6c(OC)cc7CCN([C@@H]1c7c6)C)c(O)c(OC)cc5CCN4C)c3)e2              | 7.5 | 7.5 | 7.50 |
| 174 | ZINC48057026        | Oc1ccccc(OC)c1C(=O)/C=C/e2cc(OC)ccc2OC                                                                 | 7.5 | 7.5 | 7.50 |
| 175 | 467419-73-4         | Brc1ccc2c([nH]c3c(nc23)CCN(CCc4c5c(c6ccc(Br)cc6[nH]5)ccn4)C)c1                                         | 7.5 | 7.5 | 7.50 |
| 176 | SN00149688          | Clc1cc(Cl)ccc1COe2ccc(-c3c(-c4ccc(OC)c(OC)c4)c(no3)C)c(O)e2                                            | 7.5 | 7.5 | 7.50 |
| 177 | ZINC04171591        | O=C(OC(C)C)c1c(oc2ccc(OCc3c(C)ccc(c3)C)cc21)C                                                          | 7.5 | 7.5 | 7.50 |
| 178 | ZINC02096175        | O=C1C(=C(c2ccc(OCc3cccc(c3)C)cc2O1)C)CC(OC)=O                                                          | 7.4 | 7.6 | 7.50 |
| 179 | ZINC01782009        | Clc1ccccc(COe2ccc3c(OC=C(c4ccccc4OC)C3=O)e2)c1                                                         | 7.3 | 7.7 | 7.50 |
| 180 | ZINC08994386        | Oc1cc(OCe2ccc(cc2)C)ccc1-c3c(c([nH]n3)C)-c4ccc(OC)cc4                                                  | 7.3 | 7.7 | 7.50 |
| 181 | ZINC06719437        | Oc1cc(OCe2ccccc2)ccc1-c3c(-c4ccc(OC)cc4)c(no3)C                                                        | 7.3 | 7.7 | 7.50 |
| 182 | ZINC12865161        | O[C@]12CCN(C[C@H]2CCCC1)C(=O)CCC=3C(Oe4c(c(OCc5cc(cc5)C)C)ccc4C3C)C=O                                  | 7.5 | 7.4 | 7.45 |
| 183 | ZINC01321752        | O=C1[C@H](c2c3ccccc3n(Cc4ccccc4)c2)CC(=O)N1c5cccc(OC)c5                                                | 7.4 | 7.5 | 7.45 |
| 184 | ZINC09129980        | Clc1ccccc(Cl)c1COe2ccc(-c3c(-c4ccc(OC)cc4)cn(c3)N)c(O)e2                                               | 7.4 | 7.5 | 7.45 |
| 185 | ZINC72325204        | O=C(Nc1cnn(c1)C)CCCc2en(c3ccccc32)C(C)C                                                                | 7.4 | 7.5 | 7.45 |
| 186 | SN00009552          | O=C(c1c(OC)cc(OC)cc1OC)/C=C/e2ccc(OCc3ccccc3)c(OC)e2                                                   | 7.4 | 7.5 | 7.45 |
| 187 | ZINC08764447        | O[C@H]([C@H](N(C(=O)CC=1C(Oe2c(c(OC(C)=C)ccc2C1)C)=O)C)C)c3ccccc3                                      | 7.4 | 7.5 | 7.45 |
| 188 | ZINC03840748        | O[C@H]1[C@@H](CC[C@]2(Cc3c(nc(s3)NC(=O)CC(C)(C)C)[C@H]([C@H]12)C)C)[C@@H](C(=O)N4CCCC4)C               | 7.4 | 7.5 | 7.45 |
| 189 | MolPort-002-516-108 | O=C(N[C@@H](Cc1c[nH]c2ccccc21)C(O)=O)COc3ccc4c(OC(=O)C(=C4C)C)c3                                       | 7.2 | 7.7 | 7.45 |
| 190 | SN00149009          | Clc1ccccc1COe2ccc(-c3c(-c4ccc(OC)c(OC)c4)c(no3)C)c(O)e2                                                | 7.2 | 7.7 | 7.45 |
| 191 | ZINC02148733        | O=S(=O)(N[C@@H]([C@@H](CC)C)C(Oc1ccc2C(C)=C(C(Oe2c1C)=O)C)=O)c3ccc(cc3)C                               | 7.2 | 7.7 | 7.45 |
| 192 | ZINC01799152        | Fe1c(F)c(F)c(F)c(COe2ccc3C=C(c4ccccc4)C(Oc3c2)=O)c1F                                                   | 7.2 | 7.7 | 7.45 |
| 193 | ZINC20591923        | Oc1cc(OCC[NH+]2CCOCC2)ccc1-c3c(-c4ccc(OC)c(OC)c4)c(n[nH]3)C                                            | 7.2 | 7.7 | 7.45 |
| 194 | ZINC08764397        | O=C(N[C@@H](Cc1c[nH]c2ccccc21)C)CC=3C(Oe4c(c5c(cc4C3)C)c(c(o5)C)C)C=O                                  | 7.6 | 7.3 | 7.45 |
| 195 | SN00149119          | Clc1ccc(COe2ccc(-c3c(-c4ccc(OC)cc4)c(no3)C)c(O)e2)cc1Cl                                                | 7.6 | 7.3 | 7.45 |
| 196 | MolPort-027-852-800 | Fe1ccc(-c2c([C@H](NC(=O)c3ccccc3)C)c(on2)C(O)=O)cc1                                                    | 7.3 | 7.6 | 7.45 |
| 197 | MolPort-027-852-111 | Fe1ccc(-c2nc3CO[C@@H](Cn23)CNCc4c(ccn4)C)cc1                                                           | 7.3 | 7.6 | 7.45 |
| 198 | ZINC20592055        | Oc1cc(OCC[NH+]2CCOCC2)ccc1-c3c(c([nH]n3)C)-c4ccc(OC)cc4                                                | 7.3 | 7.6 | 7.45 |
| 199 | ZINC04026460        | O[C@@H]([C@H](O)C[C@@H](O)CCCCC)CCCCCCC([O-])=O                                                        | 7.1 | 7.8 | 7.45 |
| 200 | SN00245703          | Clc1c(O)c(c(OC)c1C)C(Oc2c(c(c(OC)c2C)C(OC)=O)C)C=O)C                                                   | 7.1 | 7.8 | 7.45 |
| 201 | ZINC01124363        | Fe1ccccc1COe2ccc3C(=O)C(c4ccc(OC)c(OC)c4)=C(Oc3c2)C(OCC)=O                                             | 7.5 | 7.3 | 7.40 |
| 202 | ZINC11867170        | OC12CCN(C[C@@H]2CCCC1)C(=O)CC=3C(Oe4c(c(OCc5ccccc5)C)ccc4C3C)C=O                                       | 7.5 | 7.3 | 7.40 |
| 203 | ZINC02401695        | Fe1c(F)c(F)c(F)c(COe2ccc3C(=O)C(c4ccc5c(OCCO5)c4)=C(Oc3c2)C(OCC)=O)c1F                                 | 7.5 | 7.3 | 7.40 |
| 204 | ZINC13569111        | O=C(Nc1nc(cs1)C)CCC=2C(Oc3c(C2C)c(OC)cc4c3CCC(O4)(C)C)=O                                               | 7.5 | 7.3 | 7.40 |
| 205 | MolPort-002-514-023 | O=C(N[C@H](Cc1c[nH]c2ccccc21)C(O)=O)[C@H](Oc3ccc4c(OC(=O)C=5CCCC45)c3)C                                | 7.4 | 7.4 | 7.40 |
| 206 | 141544-63-0         | O=C1c2c3c(c4ccccc4nc3C([C@H](OC)CNC(=O)/C(C)=C)C)=C1)ccn2                                              | 7.4 | 7.4 | 7.40 |
| 207 | ZINC04090560        | O=C(N[C@@H](Cc1c[nH]c2ccccc21)C(OC)=O)CCCc3c[nH]c4ccccc43                                              | 7.4 | 7.4 | 7.40 |

|     |                     |                                                                                                                   |     |     |      |
|-----|---------------------|-------------------------------------------------------------------------------------------------------------------|-----|-----|------|
| 208 | ZINC17058595        | Oc1cc(OCC[NH+] <sub>2</sub> C[C@H](O[C@@H](C <sub>2</sub> )C)C)ccc1-c3c(-c4ccc(OC)c(OC)c4)c(n[nH] <sub>3</sub> )C | 7.4 | 7.4 | 7.40 |
| 209 | MolPort-001-745-794 | O=C(NC[C@H]1C[C@H]2CCN1C[C@H]2c3cc(mn3C)-c4cccs4)c5ccc(OC)cc5                                                     | 7.3 | 7.5 | 7.40 |
| 210 | ZINC12875010        | O=C1CN(C(=O)[C@@]2(c3c([C@H](CN12)c4cccc4OC)c5cccc5[nH] <sub>3</sub> )C)C6cccc6OC                                 | 7.3 | 7.5 | 7.40 |
| 211 | ZINC12865161        | O[C@@]12CCN(C[C@@H]2CCCC1)C(=O)CCC=3C(Oc4c(c(OCc5cc(cc5)C)C)ccc4C3C)C)=O                                          | 7.3 | 7.5 | 7.40 |
| 212 | MolPort-002-536-594 | O=C(Nc1ccc2c(c1)C=CC(O <sub>2</sub> )=O)COc3cc(O)c4C(=O)C=C(Oc4c3)c5cccc5                                         | 7.3 | 7.5 | 7.40 |
| 213 | 20208               | Clc1ccc(S(=O)(=O)Nc2nc3c(s2)C[C@@]4(CC[C@H]([C@@H](O)[C@@H]4[C@H]3C)[C@H](C)C(=O)N(CC#C)C)C)cc1                   | 7.3 | 7.5 | 7.40 |
| 214 | ZINC02115645        | O=C1C(=C(c2cc3c(OCN(c4cccc4CC)C3)c(c2O1)C)C)C5cccc5                                                               | 7.3 | 7.5 | 7.40 |
| 215 | ZINC02149058        | Clc1c(Cl)ccc(COc2ccc3c(OC(=O)C(CCC(OCC)=O)=C3C)c2)c1                                                              | 7.3 | 7.5 | 7.40 |
| 216 | ZINC09130539        | FC(F)(F)c1c(c(n[nH] <sub>1</sub> )-c2ccc(OCC(=O)N[NH <sub>3</sub> +])cc2O)-c3ccc(OC)c(OC)c3                       | 7.2 | 7.6 | 7.40 |
| 217 | ZINC03150514        | O=C(Nc1cc(ne2cccc21)C)CCCCN3C(=O)c4cccc4C3=O                                                                      | 7.2 | 7.6 | 7.40 |
| 218 | ZINC02359452        | Fe1c(F)c(F)c(F)c(F)c1OCC(Oc2ccc3c(c(c(o3)C)C(OCCOC)=O)c2)=O                                                       | 7.2 | 7.6 | 7.40 |
| 219 | ZINC01321303        | Clc1cccc1C(Oc2ccc3C(=O)C(c4ccc(OC)c(OC)c4)=C(Oc3c2)C(OCC)=O)=O                                                    | 7.5 | 7.2 | 7.35 |
| 220 | ZINC02094744        | Clc1cccc(COc2ccc3c(OC(=O)C(=C3C)CCC(OCC)=O)c2)c1                                                                  | 7.5 | 7.2 | 7.35 |
| 221 | ZINC08789240        | O[C@@]1(CC[C@H]2[C@@]1(CC[C@@H]3[C@]4(CC/C(=N)OCC(=O)N[C@H](c5cccc5)C)C=C4C[C@H]32)C)C#C                          | 7.4 | 7.3 | 7.35 |
| 222 | MolPort-042-647-983 | Clc1ccc(C(=O)c2ccc3c([C@@H](c4cc(OC)c(OC)c(OC)c4)CC(O <sub>3</sub> )=O)c2O)cc1                                    | 7.4 | 7.3 | 7.35 |
| 223 | SN00359873          | O=C1c2c(O)cc(OC)c(c2O[C@H](C1)c3ccc(OC)cc3)-c4c(O)ccc([C@H]5CC(=O)c6c(O)cc(OC)cc6O5)c4                            | 7.4 | 7.3 | 7.35 |
| 224 | ZINC20466656        | O[C@H]1[C@@H](CC[C@@]2(CC[C@@H](NC(=O)C3CC3)[C@H]([C@H]12)C)C)[C@@H](C(=O)NC4ccc(OC)cc4)C                         | 7.4 | 7.3 | 7.35 |
| 225 | ZINC02417488        | Clc1cccc(COc2ccc3C(=O)C(Oc4ccc(OC)cc4)=C(Oc3c2)C)c1                                                               | 7.4 | 7.3 | 7.35 |
| 226 | ZINC02416730        | Clc1cccc(COc2ccc3C(=O)C(c4cccc4)=C(Oc3c2)C(F)F)c1                                                                 | 7.4 | 7.3 | 7.35 |
| 227 | ZINC85879450        | O=C(NC[C@@H]1CCCC[NH+] <sub>2</sub> CCCC[C@H]12)CCCC3=Ne4cccc4C(=O)N3                                             | 7.3 | 7.4 | 7.35 |
| 228 | ZINC02148395        | O=C1C(CCC(OCC)=O)=C(c2ccc(OCc3cc(cc3)C)C)cc2O1)C                                                                  | 7.3 | 7.4 | 7.35 |
| 229 | ZINC08764768        | O=C(OC)c1c(NC(=O)CC=2C(Oc3cc(OC)ccc3C2C)=O)c4c(OC)cccc4[nH] <sub>1</sub>                                          | 7.3 | 7.4 | 7.35 |
| 230 | 121979-39-3         | O[C@@H]([C@@H](O)/C=C/C=C\CCCC(O)=O)/C=C\CCCC                                                                     | 7.3 | 7.4 | 7.35 |
| 231 | ZINC70701314        | Clc1cccc1CN2CC(=O)N3C[C@H](c4c5cccc5[nH]c4[C@@]3(C2=O)C)c6ccc(OC(C)C)c(OC)c6                                      | 7.3 | 7.4 | 7.35 |
| 232 | ZINC48057026        | Oc1cccc(OC)c1C(=O)/C=C\c2cc(OC)ccc2OC                                                                             | 7.3 | 7.4 | 7.35 |
| 233 | ZINC03875039        | O=C1C(CCCC)(COC(=O)CCC([O-])=O)C(=O)N(N1c2cccc2)c3cccc3                                                           | 7.2 | 7.5 | 7.35 |
| 234 | ZINC02148180        | O=S(=O)(N[C@@H](Cc1c[nH]e2cccc21)C(Oc3ccc4C(C)=CC(Oc4c3)=O)=O)c5ccc(cc5)C                                         | 7.2 | 7.5 | 7.35 |
| 235 | ZINC02419763        | Fe1c(F)c(F)c(F)c(F)c1COc2ccc3c(OC(=C(c4ccc(OC)cc4)C3=O)C)c2                                                       | 7.2 | 7.5 | 7.35 |
| 236 | ZINC02432591        | Clc1cccc(COc2ccc3C(=O)C(Oc4cccc4OCC)=C(Oc3c2)C)c1                                                                 | 7.1 | 7.6 | 7.35 |
| 237 | ZINC18068961        | Oc1cc(OCC(C)=C)ccc1-c2c(-c3ccc(OC)c(OC)c3)c(n[nH] <sub>2</sub> )C                                                 | 7.1 | 7.6 | 7.35 |
| 238 | ZINC01322844        | Clc1cccc(COc2ccc3c(OC(=C(c4cccc4OC)C3=O)C)c2)c1                                                                   | 7.0 | 7.7 | 7.35 |
| 239 | ZINC12603405        | Fe1ccc(-n2c(c([C@H]3C=C[C@H]([NH <sub>2</sub> +])Cc4ccc(C(C)C)cc4)C3)c(n2)C)C)cc1                                 | 7.4 | 7.2 | 7.30 |
| 240 | MolPort-010-738-591 | Fe1ccc-2c(NC3(CCN(CC3)C(=O)Cc4cccc(OC)c4)c5cccn25)c1                                                              | 7.4 | 7.2 | 7.30 |
| 241 | 114820-25-6         | O=C1C=C2CC[C@H]3[C@H]([C@@]2(CC1)C)CC[C@]4([C@H]([C@H]([C@@H]5CC(=C(C(O <sub>5</sub> )=O)C)C)CC[C@H]34)C          | 7.4 | 7.2 | 7.30 |
| 242 | ZINC00947089        | O=C(Oc1ccc2C(=O)C(Oc3cccc3)=COc2c1)COc4ccc5C(C)=CC(Oc5c4)=O                                                       | 7.4 | 7.2 | 7.30 |
| 243 | SN00009667          | O=C(c1c(OC)cccc1OC)/C=C/c2cc(OC)c(OC)c(OC)c2                                                                      | 7.4 | 7.2 | 7.30 |
| 244 | ZINC12897517        | Oc1cc(cc2c1C(=C(CC(=O)N[C@@H](Cc3c[nH]c4cccc43)C)C(O <sub>2</sub> )=O)C)C                                         | 7.4 | 7.2 | 7.30 |
| 245 | MolPort-038-386-307 | O=C(N1CCN(CC1)c2cccc2OC)c3c(noc3[C@H](O)C)-c4ccc(OC)cc4                                                           | 7.2 | 7.4 | 7.30 |
| 246 | 105377-88-6         | O[C@]([C@H]1CC[C@]([C@H](C1)C)C(=C)C)C=C)/C=C/C=C(C)C)C                                                           | 7.2 | 7.4 | 7.30 |
| 247 | ZINC05427801        | FC(F)(F)c1c(-c2ccc(OC)cc2)c(n1)-c3ccc(OCC(C)=C)cc3O                                                               | 7.2 | 7.4 | 7.30 |
| 248 | ZINC02316868        | Fe1c(F)c(F)c(F)c(F)c1OCC(Oc2ccc3c(c(c(o3)C)C(OCC)=O)c2)=O                                                         | 7.2 | 7.4 | 7.30 |
| 249 | MolPort-028-854-802 | Oc1ccc2c(oc3e2ne4e(c3-e5ccc(OC)c(O)c5)enn4C(C)C)c1C                                                               | 7.2 | 7.4 | 7.30 |
| 250 | MolPort-002-533-316 | O=C(NCCc1ccc(OC)c(OC)c1)CC=2C(Oc3cc(c4c(C)coe4c3C2C)C)=O                                                          | 7.2 | 7.4 | 7.30 |
| 251 | SN00345792          | O=C1C=C(Oc2cc(OC)c(C3=CC(=O)C(OC)=C(O <sub>3</sub> )C)c(OC)c12)c4cccc4                                            | 7.2 | 7.4 | 7.30 |
| 252 | MolPort-002-518-869 | O=S(=O)(N[C@@H]([C@@H](CC)C)C(Oc1ccc-2c(OC(=O)c3cccc32)c1)=O)c4ccc(cc4)C                                          | 7.2 | 7.4 | 7.30 |



|     |                     |                                                                                            |     |     |      |
|-----|---------------------|--------------------------------------------------------------------------------------------|-----|-----|------|
| 253 | ZINC01797720        | Fe1c(F)c(F)c(F)c(COe2ccc3C=C(c4nc5ccccc5s4)C(Oc3e2)=O)c1F                                  | 6.9 | 7.7 | 7.30 |
| 254 | MolPort-029-886-452 | Oc1c(O)c2c([C@@H](c3ccccc(OC)c3OCCc4ccc(OC)cc4)CC(O2)=O)c5c1C(=O)C=C(O5)c6ccccc6           | 7.3 | 7.3 | 7.30 |
| 255 | ZINC79210340        | O=S(=O)(Nc1cc(OC)c(OC)cc1Cc2c3cc(OC)c(OC)cc3ecn2)c4ccc5c(c4)C(=O)N(C(=O)N5CC)CC            | 7.3 | 7.3 | 7.30 |
| 256 | 9853                | Fe1ccc(C(=O)N2Cc3c(ncn3Cc4ccc(OC)cc4)C[C@H]2C(OC)=O)cc1                                    | 7.3 | 7.3 | 7.30 |
| 257 | ZINC68573697        | FC(F)(C(F)(F)O[C@@](F)(C(F)(F)F)C(Oc1cc(cc1C)C)C(=O)C(F)(F)F                               | 7.3 | 7.3 | 7.30 |
| 258 | MolPort-000-813-035 | O=C(N[C@@H](Cc1c[nH]c2ccc(O)cc21)C(O)=O)COc3ccc4c(OC(=O)C(=C4C)C)c3                        | 7.3 | 7.3 | 7.30 |
| 259 | MolPort-028-855-502 | Oc1ccc2c(oc3e2nc4c(c3-c5cc(OC)c(OC)c(OC)c5)cnn4C(C)C)c1C                                   | 7.3 | 7.3 | 7.30 |
| 260 | ZINC12865161        | O[C@@]12CCN(C[C@H]2CCCC1)C(=O)CCC=3C(Oc4c(c(OCc5cc(cc5)C)C)ccc4C3C)C(=O)                   | 7.3 | 7.3 | 7.30 |
| 261 | ZINC20622826        | Oc1c(-c2c(c([nH]n2)C)-c3ccc(OC)cc3)ccc(OCC[NH+][4CCOCC4])c1C                               | 7.3 | 7.3 | 7.30 |
| 262 | ZINC17858262        | Oc1cc(OCC(C)=C)ccc1-c2c(-c3ccc(OC)cc3)c(n[nH]2)C                                           | 7.3 | 7.3 | 7.30 |
| 263 | ZINC02147827        | O=C1c2c(OC(=C1c3ccc4c(OCCCO4)c3)C)cc(OCc5ccc(cc5)C)c(CC)c2                                 | 7.3 | 7.3 | 7.30 |
| 264 | SN00149094          | Brc1ccc(COe2ccc(-c3c(-c4ccc(OC)cc4)c(no3)C)c(O)c2)cc1                                      | 7.3 | 7.3 | 7.30 |
| 265 | ZINC13124861        | Brc1cc([C@H]2CC(=N[NH2+])2)c3cc(Cl)ccc3O)c4c(COCO4)c1                                      | 7.3 | 7.3 | 7.30 |
| 266 | MolPort-002-520-217 | O=C(N[C@H](Cc1c[nH]c2ccc(O)cc21)C(O)=O)CC3=CC(Oc4cc(OC)ccc43)=O                            | 7.1 | 7.5 | 7.30 |
| 267 | MolPort-002-519-718 | O=C(N[C@@H]([C@@H](CC)C)C(O)=O)[C@H](Oc1ccc2c(OC(=O)C(=C2C)C)c1C)C                         | 7.1 | 7.5 | 7.30 |
| 268 | ZINC02115916        | O=C1C(C2=CC(Oc3c(c(OCc4cc(cc4)C)C)ccc23)C)=O=Cc5ccccc5O1                                   | 7.1 | 7.5 | 7.30 |
| 269 | ZINC06755178        | Oc1cc(OCC(C)=C)ccc1-c2c(-c3ccc(OC)c(OC)c3)c(no2)C                                          | 7.1 | 7.5 | 7.30 |
| 270 | ZINC09130710        | Fe1ccccc1COe2ccc(-c3c(-c4ccc(OC)c(OC)c4)c([nH]n3)C)c(O)c2                                  | 7.1 | 7.5 | 7.30 |
| 271 | SN00098390          | O=C1c2c(OC)c(OC)ccc2[C@@H](O1)c3cc(OC)c(OC)cc3Cc4c5cc(OC)c(OC)cc5ecn4                      | 7.1 | 7.5 | 7.30 |
| 272 | ZINC70692199        | O=C1CN(CCC[NH+](CC)CC)C(=O)[C@@]2(c3c([C@@H](CN12)c4ccc(OCCC)c(OC)c4)c5ccccc5[nH]3)C       | 7.1 | 7.5 | 7.30 |
| 273 | MolPort-002-535-528 | O=C1c2ccccc2-c3c4c(c5cc(OCC(=O)NCC6ccc(OC)c(OC)c6)ccc5n14)ecn3                             | 7.0 | 7.6 | 7.30 |
| 274 | SN00379562          | O=C1C=C[C@@]2([C@H](C(CC[C@H]2C1(C)C)=C)COc3c(OC)cc4C=CC(Oc4e3OC)=O)C                      | 7.0 | 7.6 | 7.30 |
| 275 | SN00351686          | O=C1c2ccc(OC)c(-c3c(OC)ccc(C[C@H]4c5c(Oc6c(OC)cc7CCN([C@@H]1c7e6)C)c(O)c(OC)cc5CCN4C)c3)c2 | 7.4 | 7.1 | 7.25 |
| 276 | SN00168965          | Oc1c(OC)cc2CC[N+](=C3Cc4ccc(OC)c(Oc5ccc(C[C@@H]6c7cc(Oc1e23)c(OC)cc7CCN6C)cc5)c4)C         | 7.4 | 7.1 | 7.25 |
| 277 | ZINC20466317        | O[C@H]1[C@H](CC[C@@]2(CC[C@H](NC(=O)c3ccccc3)[C@@H]([C@H]12)C)C)[C@@H](C(=O)N4CCCC4)C      | 7.4 | 7.1 | 7.25 |
| 278 | ZINC02112486        | O=C1c2ccccc2-c3cc4c(OCN(C4)c5ccccc5CC)c(c3O1)C                                             | 7.3 | 7.2 | 7.25 |
| 279 | 6895                | Fe1c(C)ccc(-c2noc(n2)[C@@H]3C[C@@H](O)C[NH+])3Cc4ccc(cc4)C)c1                              | 7.3 | 7.2 | 7.25 |
| 280 | MolPort-029-885-299 | O=C(N[C@@H](C(C)C)c1nc2ccccc2[nH]1)CC=3C(Oc4c(c5c(cc4C3C)c(co5)C)C)=O                      | 7.3 | 7.2 | 7.25 |
| 281 | MolPort-002-536-261 | O=C(NCCc1c[nH]c2cc(OC)ccc21)CC=3C(Oc4c(c5c(cc4C3C)c(c(o5)C)C)C)=O                          | 7.3 | 7.2 | 7.25 |
| 282 | ZINC12296352        | O=C(NC[C@H]1CCC[NH+])2CCCC[C@H]12)Cc3esc(n3)C                                              | 7.3 | 7.2 | 7.25 |
| 283 | MolPort-038-386-306 | O=C(N1CCC[C@@H]1COC)c2c(noc2[C@@H](O)C)-c3ccc(OC)cc3                                       | 7.3 | 7.2 | 7.25 |
| 284 | ZINC13653587        | Oc1ccc2C(=O)/C(Oc2c1C[NH+])3CCCC[C@H]3C=C/c4ccc(OC)cc4OC                                   | 7.2 | 7.3 | 7.25 |
| 285 | ZINC04061925        | O=C1[C@@H](C[C@H](C(C(C)C)C)C)C[C@@H]1[C@H]2c3ccc(OC)c(OC)c3C(O2)=O)C                      | 7.2 | 7.3 | 7.25 |
| 286 | MolPort-002-532-941 | O=C1c2ccccc2OC(NC(=O)c3ccc(OC)cc3)=C1c4cccc(OC)c4                                          | 7.1 | 7.4 | 7.25 |
| 287 | ZINC08879630        | O=C(Nc1ccc2c1cccn2)CCC=3C(Oc4cc(OCC(C)=C)ccc4C3C)=O                                        | 7.1 | 7.4 | 7.25 |
| 288 | ZINC30879908        | Fe1ccc(C(=O)NC[C@@H]2C=C([C@@H](C[C@@H]2C(C)C)CC(=O)N3CCN(CC3)C(=O)C)C)c1                  | 7.1 | 7.4 | 7.25 |
| 289 | ZINC03846576        | O=C(C[C@H](Nc1cccc(N)c1)c2ccc3c(OCO3)c2)C=4C(=O)c5ccccc5N(C4[O-])C                         | 7.1 | 7.4 | 7.25 |
| 290 | ZINC00083661        | O=C(OC)c1c(oc2ccc(OCc3c(C)ccc(e3)C)cc21)C                                                  | 7.1 | 7.4 | 7.25 |
| 291 | ZINC02096181        | O=S(=O)(N[C@H]([C@H](CC)C)C(Oc1ccc2c(OC(=O)C=C2C)c1)=O)c3ccc(cc3)C                         | 6.8 | 7.7 | 7.25 |
| 292 | ZINC11867175        | Clc1c(Cl)ccc(COe2ccc3c(OC(=O)C(CCC(=O)N4CC[C@]5(O)CCCC[C@H]5C4)=C3C)c2)c1                  | 7.4 | 7.0 | 7.20 |
| 293 | MolPort-028-855-910 | O=C(NCCN1C(=Nc2c(Cl=O)ccn2)C)CCCc3c[nH]c4ccccc43                                           | 7.2 | 7.2 | 7.20 |
| 294 | ZINC02817963        | COc1ccc([C@H]2c3c(CC[NH2+])2)c4cccc4[nH]3)cc1CS5nc6cccc6s5                                 | 7.2 | 7.2 | 7.20 |
| 295 | ZINC62001394        | O=C1C(=C(c2c(OC)cc(OC)cc2O1)C)CC(=O)Nc3cccc4c3ccn4C                                        | 7.2 | 7.2 | 7.20 |
| 296 | ZINC02092024        | O=S(=O)(N[C@H]([C@H](CC)C)C(Oc1ccc2C(CC)=CC(Oc2c1C)=O)=O)c3ccc(cc3)C                       | 7.2 | 7.2 | 7.20 |
| 297 | ZINC08791608        | O=C(NCCCOC(C)C)CC=1C(Oc2cc3c(c(-c4ccccc4)co3)cc2C1C)=O                                     | 7.2 | 7.2 | 7.20 |

|     |                     |                                                                                           |     |     |      |
|-----|---------------------|-------------------------------------------------------------------------------------------|-----|-----|------|
| 298 | 8166                | Fe1cnc(-e2noc(n2))[C@@H]3CCC[NH+]3Cc4ceccc4OC)cc1                                         | 7.2 | 7.2 | 7.20 |
| 299 | ZINC02105206        | O=C1CN(C(=O)[C@H]2Cc3c4ceccc4[nH]e3[C@H](N12)c5ceccc(OC)c5)CCOC                           | 7.0 | 7.4 | 7.20 |
| 300 | MolPort-005-910-295 | O=C(N[C@@H](Cc1c[nH]c2ceccc21)C(O)=O)COc3ccc4c(C(=O)N5C(=N4)CCC5)c3                       | 7.0 | 7.4 | 7.20 |
| 301 | ZINC04025067        | C[C@@H]1CC(=C[C@H](C21COC(OC2)CCCCC)C)C                                                   | 7.0 | 7.4 | 7.20 |
| 302 | ZINC09130732        | Clc1c(Cl)ccc(COe2ccc(-c3c(-c4ccc(OC)c(OC)c4)c([nH]n3)C)c(O)c2)c1                          | 7.0 | 7.4 | 7.20 |
| 303 | ZINC02092577        | O=S(=O)(N[C@@H](CC(C)C)C(Oc1cc(cc2c1C(=C(C(O2)=O)C)C)=O)c3ccc(cc3)C                       | 6.9 | 7.5 | 7.20 |
| 304 | SN00268509          | Oc1ccc2cc1Oe3ccc(C[C@H]4c5c(Oc6c(OC)cc7CCN([C@H](c7c6)C2)C)c(OC)c(OC)c(OC)c5CCN4C)cc3     | 6.9 | 7.5 | 7.20 |
| 305 | ZINC12603350        | Clc1cccc(C[NH2+])[C@@H]2C=C[C@@H](C2)c3c(nn(c3C)-c4ccc(F)cc4)C)c1                         | 7.3 | 7.1 | 7.20 |
| 306 | ZINC30883993        | O[C@H]1[C@H](CC[C@@]2(CC[C@H](NC(=O)c3cncn3)[C@@H]([C@H]12)C)C)[C@@H](C(=O)N(CCC#N)C)C    | 7.3 | 7.1 | 7.20 |
| 307 | MolPort-001-742-517 | O=C(c1c(OC)cc(OC)cc1OC)/C=C\c2ccc(OC)c(OC)c2                                              | 7.3 | 7.1 | 7.20 |
| 308 | ZINC02115467        | Clc1cccc(-e2c3c(e4ceccc4[nH]3)cc(n2)C(=O)NCCe5ccc(OC)cc5)c1                               | 7.3 | 7.1 | 7.20 |
| 309 | MolPort-002-517-246 | O=C1C=C(c2ccc(OCc3ceccc(OC)c3)c(e2O1)COe4ceccc(OC)c4)c5ceccc5                             | 7.1 | 7.3 | 7.20 |
| 310 | ZINC02107236        | O=S(Oc1ccc2C(=O)C(c3ccc(OC)c(OC)c3)=C(Oc2c1)C(OCC)=O)(=O)C                                | 7.1 | 7.3 | 7.20 |
| 311 | ZINC68601377        | O=C(N[NH2+])/C=C(/C=C1C(Oc2ceccc2C1)=O)C)CCC(=O)N/N=C(/C=C3C(Oc4ceccc4C3)=O)C             | 7.1 | 7.3 | 7.20 |
| 312 | ZINC70692423        | Clc1cc(Cl)ccc1CN2CC(=O)N3C[C@H](c4c5ceccc5[nH]c4[C@]3(C2=O)C)c6ccc(CC)cc6                 | 7.1 | 7.3 | 7.20 |
| 313 | MolPort-044-544-310 | O=C1C=C(c2cc(cc2O1)C)C3=Cc4c(OC)c(OC)c5c6cc(OC)c(OC)cc6ccc5c4CCN3C                        | 7.1 | 7.3 | 7.20 |
| 314 | ZINC04387787        | Fe1c(OCC)c(F)c(F)c(COe2ccc3c(c(c(o3)C)C([O-])=O)c2)c1F                                    | 7.1 | 7.3 | 7.20 |
| 315 | 1877                | Oc1c(c(O)cc(c1C(Oe2c(c(OC)c(e2C)C)C(Oe3c(c(OC)c(e3C)C)C([O-])=O)C)=O)C)=O)C               | 7.1 | 7.3 | 7.20 |
| 316 | ZINC08479128        | O=C(Nc1ceccc1OCC)CC=2C(Oc3cc(e4c(C)coe4c3C2C)C)=O                                         | 7.1 | 7.3 | 7.20 |
| 317 | ZINC04100775        | Clc1ceccc1/C=C\C(=O)c2c(OC)cc(OC)cc2OC                                                    | 7.1 | 7.3 | 7.20 |
| 318 | ZINC01111774        | Clc1c(Cl)ccc(COe2ccc3c(OC(=O)C(=C3C)CC(OC)=O)c2)c1                                        | 7.1 | 7.3 | 7.20 |
| 319 | ZINC01118985        | Clc1cccc(COe2ccc3c(OC(=O)C(=C3C)CCC(OCC)=O)c2C)c1                                         | 7.1 | 7.3 | 7.20 |
| 320 | SN00063216          | O=C1c2cc(ccc2OC=3C(=O)N([C@@H](C13)c4ccc(O)c(OC)c4)CCc5ccc(OC)cc5)C                       | 7.4 | 6.9 | 7.15 |
| 321 | ZINC02156156        | O=C(N[C@H]([C@H](CC)C)C([O-])=O)CC=1C(Oc2c(e3c(cc2C1C)c(c(o3)C)C)C)=O                     | 7.4 | 6.9 | 7.15 |
| 322 | ZINC02091864        | O=C1C(=C(c2ccc(OCc3cc(cc3)C)C)cc2O1)C)CC(OC)=O                                            | 7.4 | 6.9 | 7.15 |
| 323 | MolPort-029-886-141 | O=C1[C@H](NC(=O)N1Cc2ccc(OC)cc2)CC(=O)NCCc3c[nH]e4ccc(OC)cc43                             | 7.4 | 6.9 | 7.15 |
| 324 | ZINC35425888        | COe1c(OC)c(OC)cc(C[NH+]2CCC[C@H]2c3nc(no3)-c4enc(OC)cc4)c1                                | 7.3 | 7.0 | 7.15 |
| 325 | SN00155517          | Oc1c(c(OC)cc(OC)c1CC=C(C)C)C(=O)/C=C/c2c(OC)cc(OC)cc2OC                                   | 7.2 | 7.1 | 7.15 |
| 326 | ZINC20611253        | O=C(N[C@@H]([C@@H](CC)C)C([O-])=O)[C@H](N1C(=O)Ne2ceccc2C1=O)CC(C)C                       | 7.2 | 7.1 | 7.15 |
| 327 | ZINC08764272        | O=C(N[C@@H](Cc1c[nH]c2ceccc21)C)CC=3C(Oe4cc5c(cc4C3C)c(C)co5)=O                           | 7.2 | 7.1 | 7.15 |
| 328 | ZINC03840780        | Fe1cccc(F)c1C(=O)Ne2nc3c(s2)C[C@]4(CC[C@H]([C@H](O)[C@@H]4[C@H]3C)[C@H](C(=O)N(CC=C)C)C)C | 7.2 | 7.1 | 7.15 |
| 329 | ZINC04252739        | O=C(c1c(OC)ceccc1OC)/C=C\c2cc(OC)c(OC)c(OC)c2                                             | 7.2 | 7.1 | 7.15 |
| 330 | ZINC20757263        | OC1=C([C@@H]2c3c(e4ceccc4[nH]3)CCN2C)C(=O)N(C(=O)N1c5ccc(OC)cc5)C                         | 7.1 | 7.2 | 7.15 |
| 331 | SN00077518          | O=C1[C@H-]([C@@H](N(CCOC)C1=O)c2ccc(OC)c(OC)c2)C(=O)c3ccc(OC)cc3                          | 7.1 | 7.2 | 7.15 |
| 332 | ZINC12891809        | O=C(Nc1ccc2c(e1)cc[nH]2)CC=3C(Oe4cc(OCC(C)=C)ccc4C3C)=O                                   | 7.1 | 7.2 | 7.15 |
| 333 | ZINC02094302        | O=C1c2ceccc2-e3ccc(OCC(=O)e4e(n(e5ceccc54)C)C)c(e3O1)C                                    | 7.1 | 7.2 | 7.15 |
| 334 | ZINC70666401        | Bre1ccc2ccn(CCC(=O)Nc3ceccc4c3cc[nH]4)c2c1                                                | 7.1 | 7.2 | 7.15 |
| 335 | ZINC13127298        | Oc1cc(OC)ccc1-c2c(-c3ccc(OC)c(OC)c3)c([nH]n2)C                                            | 7.0 | 7.3 | 7.15 |
| 336 | ZINC79189085        | O=C(NCCn1ccc2c(OC)ceccc21)C3=CC(=O)N(c4ceccc34)C                                          | 7.0 | 7.3 | 7.15 |
| 337 | ZINC01111387        | O=C1C(=C(c2ccc(OCc3ceccc(e3)C)c(e2O1)C)C)CC(OC)=O                                         | 7.0 | 7.3 | 7.15 |
| 338 | ZINC02159445        | O=C1C=C(CCC)c2ccc3c(CN(CO3)e4c(C)ccc(e4)C)c2O1                                            | 7.0 | 7.3 | 7.15 |
| 339 | MolPort-044-830-921 | O[C@@H]1[C@@H](n2enc3cc(OC)c(OC)cc32)[C@@H]4OC[C@@H](O4)[C@H]1NCc5c(noc5)C                | 7.0 | 7.3 | 7.15 |
| 340 | ZINC70687971        | Bre1cccc(COe2ccc3C(=C(CC(=O)N4CC[C@@]5(O)CCCC[C@H]5C4)C(Oc3c2C)=O)C)c1                    | 7.0 | 7.3 | 7.15 |
| 341 | SN00151294          | FC(F)(F)c1c(c(on1)-c2ccc(OCC(C)=C)cc2O)-c3ccc(OC)c(OC)c3                                  | 6.9 | 7.4 | 7.15 |
| 342 | MolPort-009-649-059 | O=C1C[C@@H](e2c(N1)c(en2-c3c(OC)ccc(OC)c3)C(O)=O)c4ccc(OC)c(O)c4                          | 6.9 | 7.4 | 7.15 |
| 343 | ZINC01322799        | O=C1c2ccc(OCc3ceccc(OC)c3)cc2OC(=C1c4ccc(OC)c(OC)c4)C(OCC)=O                              | 6.9 | 7.4 | 7.15 |

|     |                     |                                                                                                             |     |     |      |
|-----|---------------------|-------------------------------------------------------------------------------------------------------------|-----|-----|------|
| 344 | ZINC12901891        | O=C1C(=C(c2c(OC)cc3c(CCC(O3)(C)C)c2O1)C)CC(=O)Nc4cc(OC)cc(OC)c4                                             | 6.9 | 7.4 | 7.15 |
| 345 | 12169               | CC([C@@H]1C[C@@H](C=C[C@H]1C[NH+](C)C)C)Cc2nc3ccc(OC)nc3[nH]2)C                                             | 7.2 | 7.0 | 7.10 |
| 346 | ZINC02093820        | O=C(c1c2cc(OC)ccc2n(c1C)C)COc3ccc4C(=C(Cc5ccccc5)C(Oc4c3C)=O)C                                              | 7.2 | 7.0 | 7.10 |
| 347 | ZINC01447881        | Clc1cccc(COe2ccc3C(=O)C(Oc4ccc(cc4)C(OC)=O)=COc3c2)c1                                                       | 7.2 | 7.0 | 7.10 |
| 348 | ZINC09266649        | Clc1c(Cl)ccc(COe2ccc3C(=O)C(c4ccc5c(OCCO5)c4)=COc3c2)c1                                                     | 7.2 | 7.0 | 7.10 |
| 349 | ZINC12881699        | O=C1c2c(OC)c(OC)ccc2[C@@H]3c4c([C@@H](CN13)c5ccc(OCC)c(OC)c5)c6ccccc6[nH]4                                  | 7.1 | 7.1 | 7.10 |
| 350 | 78518-73-7          | O[C@H]1CC[C@]2([C@H](OC1(C)C)CC[C@](O)([C@@H]2CC[C@H]3C(=CC[C@H]4[C@H](C3(C)C)CC[C@]4(O)C)C)C               | 7.1 | 7.1 | 7.10 |
| 351 | ZINC20467354        | Fe1cccc(NC(=O)N[C@@H]2CC[C@@]3(CC[C@H]([C@H](O)[C@@H]3[C@H]2C)[C@@H](C(=O)N4CCCC4)C)C)c1                    | 7.1 | 7.1 | 7.10 |
| 352 | MolPort-028-855-487 | Oc1ccc2c(oc3c2nc4c(c3-c5ccc(OC)c(OC)c5)enn4C(C)C)c1C                                                        | 7.1 | 7.1 | 7.10 |
| 353 | ZINC04252699        | O=C(c1c(OC)cc(OC)cc1OC)/C=C/c2ccc(OC)c(OC)c2                                                                | 7.1 | 7.1 | 7.10 |
| 354 | ZINC01797677        | O=C(OCCOC)c1c(oc2ccc(OCc3c(C)ccc(c3)C)cc21)C                                                                | 7.1 | 7.1 | 7.10 |
| 355 | ZINC02122276        | O=C1C=C(CCCC)c2ccc3c(CN(CO3)c4c(C)ccc(c4)C)c2O1                                                             | 7.0 | 7.2 | 7.10 |
| 356 | ZINC08993442        | Clc1cccc1C(Oc2ccc3C(=O)/C(Oc3c2C)=C\c4en(c5ccc(OC)cc45)CC)=O                                                | 6.9 | 7.3 | 7.10 |
| 357 | SN00151259          | Fe1cccc1COe2ccc(-c3c(-c4ccc(OC)cc4)c(no3)C(F)(F)F)c(O)c2                                                    | 6.9 | 7.3 | 7.10 |
| 358 | ZINC02122006        | Bre1ccc(N2COc3c(c4c(cc3C2)C(=C(Cc5ccccc5)C(O4)=O)C)C)c(C)c1                                                 | 6.9 | 7.3 | 7.10 |
| 359 | ZINC08739938        | FC(F)(F)c1c(c(n[nH]1)-c2ccc(O)cc2O)-c3ccc(OC)c(OC)c3                                                        | 6.9 | 7.3 | 7.10 |
| 360 | ZINC02149345        | Clc1c(Cl)ccc(COe2ccc3C(=C(CCC([O-])=O)C(Oc3c2C)=O)C)c1                                                      | 6.8 | 7.4 | 7.10 |
| 361 | ZINC20111812        | Fe1ccc(C(=O)C[C@H]2c3c(OC)c4c(OCO4)cc3CC[NH+]2C)cc1                                                         | 7.2 | 6.9 | 7.05 |
| 362 | 20391               | Fe1cc(F)cc(CNC(=O)[C@H]([C@@H]2CC[C@]3(CC[C@@H](NC(=O)CC(C)C)C)[C@@H]([C@H]3[C@@H]2O)C)C)c1                 | 7.2 | 6.9 | 7.05 |
| 363 | ZINC15674342        | Fe1c(C)ccc(-c2noc(n2)[C@H]3C[C@H](O)[C@H]3C4c5ccc5o4)c1                                                     | 7.2 | 6.9 | 7.05 |
| 364 | MolPort-001-910-598 | OC(=O)CCc1ccc(n1-c2ccc(OC)cc2OC)-c3ccc(OC)cc3                                                               | 6.9 | 7.2 | 7.05 |
| 365 | MolPort-002-525-441 | O=C(N[C@@H](Cc1c[nH]c2ccccc21)C(O)=O)[C@H](Oc3cc(cc4c3C5=C(CCC5)C(O4)=O)C)C                                 | 6.9 | 7.2 | 7.05 |
| 366 | MolPort-001-838-316 | Oc1cc(OC)c(CCC)cc1-c2c(-c3ccc4c(OCCCO4)c3)c[nH]n2                                                           | 6.9 | 7.2 | 7.05 |
| 367 | ZINC01448111        | Clc1cccc(COe2ccc3C(=O)C(Oc4ccccc4OC)=COc3c2)c1                                                              | 6.9 | 7.2 | 7.05 |
| 368 | 19304               | Fe1ccc(-e2c([C@H](NC(=O)c3cc(n(n3)C)C)c)C)c(on2)C([O-])=O)cc1                                               | 6.7 | 7.4 | 7.05 |
| 369 | 169340-01-6         | O[C@]1(CC[C@H]2[C@](C[C@@H](OC(=O)C)[C@H]3C(CCC[C@]23C)(C)C)(C1)C)[C@H]4CC(=O)C(=C[C@H]4O)C                 | 6.7 | 7.4 | 7.05 |
| 370 | ZINC30883259        | CC([C@H]1C[C@@H](C(=C[C@H]1C[NH+]2CCN(CC2)C)C)Cc3nnc(o3)-c4ccc(OC)cc4)C                                     | 7.3 | 6.8 | 7.05 |
| 371 | ZINC85874833        | OC=1C(=O)C=C(N(C1C[NH+]2[C@H]3CC(C[C@@](C3)(C2)C)C)C)C                                                      | 7.1 | 7.0 | 7.05 |
| 372 | ZINC02341762        | O=C(OCCOC)c1c(n(c2ccc(OC(=O)c3cccs3)cc21)C)C                                                                | 7.1 | 7.0 | 7.05 |
| 373 | ZINC05646268        | FC(F)(F)c1c(c(n[nH]1)-c2ccc(OC)cc2O)-c3ccc(OC)c(OC)c3                                                       | 7.1 | 7.0 | 7.05 |
| 374 | MolPort-002-525-094 | O=C(NCc1cccc1)c2cc3c4cccc4[nH]c3c(n2)-e5ccc(OCC)c(OC)c5                                                     | 7.1 | 7.0 | 7.05 |
| 375 | SN00142352          | O=C1C(=O)c2c(O)c(c(OC)c(OC)c2[C@]3(CCCC([C@@H]13)(C)C)C)[C@@H](CO)C                                         | 7.1 | 7.0 | 7.05 |
| 376 | SN00309254          | Oc1ccc2cc1Oe3ccc(C[C@H]4c5c(Oc6c(OC)cc7CCN[C@H](c7c6)C2)c(OC)c(OC)cc5CCN4C)cc3                              | 7.0 | 7.1 | 7.05 |
| 377 | ZINC08991161        | O=S(Oc1ccc2C(=O)/C(Oc2c1C)=C\c3en(c4ccccc34)CC)(=O)c5ccccc5                                                 | 7.0 | 7.1 | 7.05 |
| 378 | ZINC09129150        | FC(F)(F)c1c(-c2ccc(OC)cc2)c(on1)-c3ccc(OCc4ccccc4)cc3O                                                      | 7.0 | 7.1 | 7.05 |
| 379 | SN00265756          | O=C(c1c(OC)cc2c(OCO2)c1OC)/C=C/c3cc(OC)c(OC)c(OC)c3OC                                                       | 7.0 | 7.1 | 7.05 |
| 380 | SN00379562          | O=C1C=C[C@]2([C@H](C(CC[C@@H]2C1(C)C)=O)COc3c(OC)cc4C=CC(Oc4c3OC)=O)C                                       | 7.0 | 7.1 | 7.05 |
| 381 | ZINC01463420        | O=C(OCC)c1c2cc(OCc3c(C)ccc(c3)C)ccc2n(c1C)C                                                                 | 7.0 | 7.1 | 7.05 |
| 382 | ZINC03846558        | Oc1cccc1[C@H](Ne2cccc3ccc(N)c32)CC(=O)C=4C(=O)c5ccccc5N(C4[O-])C                                            | 6.8 | 7.3 | 7.05 |
| 383 | ZINC20611343        | O=C(N[C@@H]([C@@H](CC)C)C([O-])=O)[C@H](N1C(=O)Ne2ccccc2C1=O)Cc3ccccc3                                      | 6.8 | 7.3 | 7.05 |
| 384 | 6277-14-1           | OC(=O)[C@@]1(CC[C@@]2(CC[C@]3(C([C@H]2C1)=CC(=O)[C@@H]4[C@]3(CC[C@@H]5C([C@@H](OC(=O)C)CC[C@]54C)(C)C)C)C)C | 6.8 | 7.3 | 7.05 |
| 385 | MolPort-000-852-534 | O=C(NCCc1c[nH]c2ccccc21)c3ccccc3NC(=O)c4ccc(OC)cc4                                                          | 7.2 | 6.8 | 7.00 |
| 386 | ZINC08790706        | O=C(N[C@H](CNC(=O)[C@@]12CC[C@@](C1(C)C)(C(O2)=O)C)C)[C@]34CC[C@](C3(C)C)(C(O4)=O)C                         | 7.1 | 6.9 | 7.00 |
| 387 | ZINC03999931        | O=C1CN2c3ccccc3C([C@]2(N1)/C=C/c4ccccc4OCCCCC)(C)C                                                          | 7.1 | 6.9 | 7.00 |
| 388 | 163597-60-2         | O[C@@]1(C2=CC[C@H]([C@@]1(CCC(=CCC[C@]3([C@H](O3)C2=O)C)C)C)C                                               | 7.0 | 7.0 | 7.00 |

|     |                     |                                                                                          |     |     |      |
|-----|---------------------|------------------------------------------------------------------------------------------|-----|-----|------|
| 389 | MolPort-002-536-237 | O=C(Nc1c2cccc2oc1C3=CC(Oc4c(cc(cc43)C)C)=O)e5cccc5OC                                     | 7.0 | 7.0 | 7.00 |
| 390 | SN00083390          | O=C(Nc1cc(OC)c(OC)cc1Cc2c3cc(OC)c(OC)cc3ccn2)e4ccc(OCCCC)cc4                             | 7.0 | 7.0 | 7.00 |
| 391 | 23212               | O[C@@H]1CC[C@@H]2[C@@]3(CO[C@H](O[C@H]3CC[C@]2([C@@H]1CC(=O)NCc4ccc(OC)cc4)C)COc5cccc5)C | 7.0 | 7.0 | 7.00 |
| 392 | ZINC02401244        | Clc1c(Cl)cc(COe2ccc3C(=O)C(Oc4cccc4OC)=COc3e2)cc1                                        | 7.0 | 7.0 | 7.00 |
| 393 | ZINC12660555        | Clc1ccc2c(c(NC(=O)C[NH+]3CCc4cc(OC)c(OC)cc4[C@@H]3C)c([nH]2)C(OC)=O)c1                   | 7.0 | 7.0 | 7.00 |
| 394 | MolPort-002-509-346 | Oc1cc(O)c(-c2c(-c3ccc(OC)cc3)c[nH]n2)cc1CC                                               | 6.9 | 7.1 | 7.00 |
| 395 | ZINC05646116        | FC(F)(F)c1c(c(n[nH]1)-c2ccc(OCC)cc2O)-c3ccc(OC)c(OC)c3                                   | 6.9 | 7.1 | 7.00 |
| 396 | ZINC02094353        | O=C1C(CCC(OCC)=O)=C(c2ccc(OCc3cccc(e3)C)cc2O1)C                                          | 6.9 | 7.1 | 7.00 |
| 397 | ZINC03846618        | O=C(C[C@@H](Ne1ccc(N)cc1)e2ccc(N(C)C)cc2)C=3C(=O)e4cccc4N(C3[O-])C                       | 6.9 | 7.1 | 7.00 |
| 398 | ZINC09129706        | Clc1cccc(Cl)c1COc2ccc(-c3c(-c4ccc(OC)c(OC)c4)cnen3)c(O)c2                                | 6.9 | 7.1 | 7.00 |
| 399 | ZINC20113162        | FC(F)(F)c1cccc(N2C(=O)NC(=O)C([C@H]3e4c(OC)c5e(OCO5)cc4CCN3C)=C2O)c1                     | 6.9 | 7.1 | 7.00 |
| 400 | ZINC02119961        | Clc1cccc(COe2ccc3c(OC(=O)C=C3C=4C(Oc5cccc5C4)=O)e2)c1                                    | 6.9 | 7.1 | 7.00 |
| 401 | ZINC06662659        | FC(F)(F)c1c(c(on1)-c2ccc(OC)cc2O)-c3ccc(OC)c(OC)c3                                       | 6.8 | 7.2 | 7.00 |
| 402 | ZINC00129480        | O=C(Oc1ccc2C(C)=CC(Oc2e1)=O)COc3ccc(CC)cc3                                               | 6.8 | 7.2 | 7.00 |
| 403 | ZINC02283570        | Fe1c(F)c(F)c(F)c(COe2ccc3c(c(c(o3)C)C(OCC)=O)e2)c1F                                      | 6.8 | 7.2 | 7.00 |
| 404 | MolPort-039-195-602 | Clc1ccc(C(=O)e2ccc3c([C@H](c4cc(OC)c5c(OCO5)c4)CC(O3)=O)c2O)cc1                          | 6.8 | 7.2 | 7.00 |
| 405 | ZINC05484338        | Oc1cc(OCe2cc(ccc2C)C)ccc1-c3c(-c4ccc(OC)cc4)enen3                                        | 6.8 | 7.2 | 7.00 |
| 406 | ZINC06669439        | FC(F)(F)c1c(c(on1)-c2ccc(OCC)cc2O)-c3ccc(OC)c(OC)c3                                      | 6.7 | 7.3 | 7.00 |
| 407 | 19317               | Fe1ccc(-c2c([C@@H](NS(=O)(=O)c3ccc(OC)cc3)C)c(on2)C([O-])=O)cc1                          | 6.7 | 7.3 | 7.00 |
| 408 | ZINC68591815        | Oc1c(OC)cc([C@@H](Ne2nc(c(s2)C)C)CC(=O)C=3C(=O)e4cccc4N(C3[O-])C)cc1OC                   | 6.7 | 7.3 | 7.00 |
| 409 | 6883                | Fe1c(C)ccc(-c2noc(n2)[C@@H]3C[C@H](O)C[NH+]3Cc4ccc(F)cc4)c1                              | 7.2 | 6.7 | 6.95 |
| 410 | ZINC70687765        | FC(F)(F)c1ccc(COe2ccc3C(=C(CCC(=O)N4CC[C@]5(O)CCCC[C@H]5C4)C(Oc3e2C)=O)C)c1              | 7.0 | 6.9 | 6.95 |
| 411 | ZINC02112065        | Clc1c(OCC(=O)e2c(n(c3ccc(OC)cc23)C)C)cc4c(C(=C(CCC(OCC)=O)C(O4)=O)C)c1                   | 7.0 | 6.9 | 6.95 |
| 412 | ZINC02111331        | O=C(c1c2cccc2n(c1C)C)COc3cc4c(cc3CC)C(C)=CC(O4)=O                                        | 7.0 | 6.9 | 6.95 |
| 413 | 12308               | Fe1cccc(C(=O)NC[C@@H]2C=C([C@@H](C[C@@H]2C(C)C)CC(=O)NCCOC)C)c1                          | 7.0 | 6.9 | 6.95 |
| 414 | 149355-76-0         | O=C1c2c(c3-c4cc(OC)c(O)cc4Cn23)-c5ccc(OC)c(OC)c5)-c6cc(OC)c(O)cc6O1                      | 7.0 | 6.9 | 6.95 |
| 415 | SN00309240          | Oc1c(OC)c(OC)nc(C/C=C/C/C=C/C=C[C@@H]([C@H](OC)[C@@]2([C@@H](O2)C)C)C)C)c1C              | 6.9 | 7.0 | 6.95 |
| 416 | MolPort-001-626-086 | O=C(Nc1cc(OC)c(OC)cc1Cc2c3cc(OC)c(OC)cc3ccn2)e4ccc(cc4)C                                 | 6.9 | 7.0 | 6.95 |
| 417 | ZINC01321302        | O=C1c2ccc(OC(=O)c3c(oc4ccc(OC(=O)C)cc43)C)cc2OC(=C1c5ccc(OC)c(OC)c5)C(OCC)=O             | 6.9 | 7.0 | 6.95 |
| 418 | ZINC16364038        | Clc1ccc(N[C@H](CC(=O)C=2C(=O)c3cccc3N(C2[O-])C)e4ccc(N(C)C)cc4)cc1                       | 6.9 | 7.0 | 6.95 |
| 419 | ZINC04278011        | Fe1ccc(N2C(=O)N[C@H]3CCN([C@H]3C2=O)C(=O)e4ccc5cccc5e4)cc1                               | 6.9 | 7.0 | 6.95 |
| 420 | MolPort-044-180-963 | Clc1cccc1-e2c(nc(s2)C)C(=O)N(C[C@@H]3CCCN4CCCC[C@H]34)CCOC                               | 6.9 | 7.0 | 6.95 |
| 421 | ZINC01280062        | O=C(c1c(cc2C([C@H](C(c2e1)(C)C)C)C)C)C[C@H]3e4c(OC)c5c(OCO5)cc4CC[N+](3)C)C              | 6.9 | 7.0 | 6.95 |
| 422 | ZINC18166941        | FC(F)(F)c1c(c([nH]n1)-c2ccc(O)cc2O)-c3ccc(OC)cc3                                         | 6.7 | 7.2 | 6.95 |
| 423 | SN00353994          | O[C@H]1CC[C@]2([C@@H](C(CC[C@H]2C1(C)C)=C)COc3c(OC)cc4C=CC(Oc4c3OC)=O)C                  | 6.7 | 7.2 | 6.95 |
| 424 | 15714               | Clc1cc(C(=O)Ne2ccc([C@@H](O)[C@H]3COCC(=O)N3Cc4ccccn4)cc2)ccn1                           | 6.7 | 7.2 | 6.95 |
| 425 | MolPort-035-701-757 | Oc1cc(C2=CC(=O)e3c(O)cc4c([C@@H](c5ccc(OC)c(OCC(OC)=O)c5)CC(O4)=O)c3O2)ccc1OC            | 6.7 | 7.2 | 6.95 |
| 426 | ZINC04045543        | O=C1C(CCC([O-])=O)=C(c2ccc(OCc3cc(cc3)C)C)c(e2O1)C)C                                     | 6.5 | 7.4 | 6.95 |
| 427 | MolPort-035-701-683 | O=C(N1CCN(CC1)C)C[C@H](c2c(O)c(O)c(O)c3C(=O)C=C(Oc32)c4cccc4)c5cccc(OC)c5                | 6.8 | 7.1 | 6.95 |
| 428 | ZINC09423424        | O=C1c2ccc(OC(=O)c3cccc3)c(e2O/C1=C/c4cn(c5cccc45)CC)C                                    | 6.8 | 7.1 | 6.95 |
| 429 | SN00073713          | O=C1c2cccc2OC(/N=C(\O)c3ccc(OC)cc3)=C1c4cccc(OC)c4                                       | 6.8 | 7.1 | 6.95 |
| 430 | ZINC02281027        | Fe1c(F)c(F)c(F)c(COe2ccc3c(c(c(o3)C)C(OC(C)C)=O)c2)c1F                                   | 6.8 | 7.1 | 6.95 |
| 431 | ZINC01663395        | Cc1cc(nm1CN(Cn2c(ccn2)C)C)c3ccc(N(Cn4c(ccn4)C)C)Cn5c(ccn5)C)cc3)C                        | 6.8 | 7.1 | 6.95 |
| 432 | ZINC01463853        | Clc1cccc(COe2ccc3c(OC(=C(c4ccc(OC)cc4)C3=O)C)c2)c1                                       | 6.8 | 7.1 | 6.95 |
| 433 | SN00173499          | O[C@H]1c2cc(OC)ccc2O[C@H]([C@@H]1[C@@H]3COc4c(Cc5ccc(CC)c(O)c5)cc(OC)cc4[C@H]3O)CCOC     | 6.8 | 7.1 | 6.95 |
| 434 | MolPort-000-823-233 | OC(=O)[C@H](NC(=O)COc1ccc-2c(OC(=O)c3cccc32)c1C)Cc4c[nH]c5cccc54                         | 6.6 | 7.3 | 6.95 |

|     |                     |                                                                                                  |     |     |      |
|-----|---------------------|--------------------------------------------------------------------------------------------------|-----|-----|------|
| 435 | ZINC01940964        | Clc1c(Cl)ccc(COe2ccc3C(=O)C(Oe4ccc(OC)cc4)=COe3c2)c1                                             | 6.6 | 7.3 | 6.95 |
| 436 | MolPort-002-532-272 | O=C1[C@@]2([C@]3([C@H]([C@H]4CCCCN4)C(=O)c5ccccc(OC)c5)C(=O)Nc6ccccc63)c7cccc(c7N1)C             | 7.1 | 6.7 | 6.90 |
| 437 | MolPort-001-737-843 | O=C1CN(C(=O)[C@@H]2Cc3c4cccc4[nH]c3[C@@H](N12)c5cc(OC)c(OC)c(OC)c5)CCc6ccc(OC)c(OC)c6            | 7.1 | 6.7 | 6.90 |
| 438 | 15331               | O=C(N1CCCCC1)[C@@H]2Cc3cn(c4cccc([C@@H]([NH2+])2)CC(C)C)c43)Cc5cc(on5)C                          | 7.1 | 6.7 | 6.90 |
| 439 | MolPort-008-348-482 | O=C1COc2ccc(NC(=O)C(=O)NCCc3c[nH]c4ccc(OC)cc43)cc2N1C                                            | 7.1 | 6.7 | 6.90 |
| 440 | 13183               | CC([C@@H]1C[C@@H](Cc2nc3cccc(c3[nH]2)C)C(=C[C@H]1C[NH2+])Cc4cnc4)C)C                             | 7.0 | 6.8 | 6.90 |
| 441 | ZINC68572030        | Br1cc(Br)cc(-c2nnc(SCC=C)n2[NH3+])c1O                                                            | 7.0 | 6.8 | 6.90 |
| 442 | ZINC00945051        | Clc1cccc(COe2ccc3C(=O)C(Oe4ccc(OC)cc4)=COe3c2)c1                                                 | 7.0 | 6.8 | 6.90 |
| 443 | 189083-79-2         | Oc1c(OC)ccc(-c2c3-c4cc(OC)c(O)cc4OC(=O)c3n5CCc6cc(OC)c(OC)cc6-c25)c1                             | 7.0 | 6.8 | 6.90 |
| 444 | ZINC49543314        | O=C1C[C@@H](c2c(N1)c(en2-c3ccc(OC)cc3OC)C([O-])=O)c4ccc(OC)c(OC)c4                               | 6.9 | 6.9 | 6.90 |
| 445 | ZINC62001460        | Oc1c2C(OCe2c(c(OC)c1C/C=C(/CCC(=O)Nc3nc(c(s3)C)C)C)C)=O                                          | 6.9 | 6.9 | 6.90 |
| 446 | MolPort-002-675-581 | Clc1ccc2c(c3CCN[C@@H](c3[nH]2)C4=C(O)NC(=O)N(C4=O)Cc5ccc(OC)cc5)c1                               | 6.9 | 6.9 | 6.90 |
| 447 | ZINC70701314        | Clc1cccc1CN2CC(=O)N3C[C@@H](c4e5cccc5[nH]c4[C@]3(C2=O)C)c6ccc(OC(C)C)c(OC)c6                     | 6.9 | 6.9 | 6.90 |
| 448 | ZINC02289379        | Fe1c(F)c(F)c(F)c(COe2ccc3c(c(c(o3)C)C(OC)=O)c2)c1F                                               | 6.9 | 6.9 | 6.90 |
| 449 | ZINC00323509        | O[C@]([C@@H]1Cc2c(OC)c3cccc3ne2O1)(COC(=O)C)C                                                    | 6.9 | 6.9 | 6.90 |
| 450 | ZINC02433600        | Fe1c(F)c(F)c(F)c(COe2ccc3C(=O)C(c4ccc(OC)c(OC)c4)=C(Oc3c2)C)c1F                                  | 6.9 | 6.9 | 6.90 |
| 451 | 115982-19-9         | Oc1c(OC)c(OC)cc-2c1CCn3c4C(Oc5cc(O)c(OC)cc5-c4c(c23)-c6ccc(OC)c(O)c6)=O                          | 6.9 | 6.9 | 6.90 |
| 452 | ZINC02118774        | O=C1C=C(CCC)c2c(O1)c(c3c(CN(c4c(ccc4C(C)C)C)CO3)c2)C                                             | 6.9 | 6.9 | 6.90 |
| 453 | 131917-09-4         | O[C@@H]([C@H](O)[C@H](O)C=C/C=C/C=C/C=C)CCCC(O)=O)C/C=C/CC                                       | 6.8 | 7.0 | 6.90 |
| 454 | ZINC09409633        | Br1ccc(-c2c(nc(ne2-c3ccc(OCC(C)=C)cc3O)N)C(F)(F)F)cc1                                            | 6.8 | 7.0 | 6.90 |
| 455 | MolPort-002-516-123 | O=C(N[C@@H](Cc1c[nH]c2cccc21)C(O)=O)COe3cc(cc4c3C5=C(CCCC5)C(O4)=O)C                             | 6.8 | 7.0 | 6.90 |
| 456 | ZINC40312612        | O=C1C[C@H](c2c(N1)c(en2-c3ccc(OC)cc3)C([O-])=O)c4ccc(OC)c(OC)c4OC                                | 6.7 | 7.1 | 6.90 |
| 457 | ZINC11867078        | O[C@]12CCN(C[C@H]2CCCC1)C(=O)CC=3C(Oc4c(c(OCc5ccc(cc5)C)C)ccc4C3C)C)=O                           | 6.7 | 7.1 | 6.90 |
| 458 | ZINC02125245        | O=C1C=C(c2ccc3c(CN(CO3)c4c(C)ccc(c4)C)c2O1)CC                                                    | 6.7 | 7.1 | 6.90 |
| 459 | MolPort-023-275-183 | Fe1cccc1CN[C@@H]2CO[C@H]([C@H]2O)CNS(=O)(=O)c3cccc(cc3)C                                         | 6.6 | 7.2 | 6.90 |
| 460 | ZINC02091635        | O=C1C(=C(c2ccc(OCc3cc(cc3)C)C)c(c2O1)C)C)CC(OC)=O                                                | 7.1 | 6.6 | 6.85 |
| 461 | ZINC01799114        | Clc1c(Cl)ccc(COe2ccc3C=C(c4nc5cccc5s4)C(Oc3c2)=O)c1                                              | 7.1 | 6.6 | 6.85 |
| 462 | MolPort-009-759-056 | O=C(NCCN1C(=Ne2cccc2C1=O)C)CCCc3c[nH]c4cccc43                                                    | 6.9 | 6.8 | 6.85 |
| 463 | ZINC04222564        | Fe1cc(F)cc(CNC(=O)C[C@@H]2c3c(sc(n3)NCC=C)C[C@H]4[C@]([C@@H](O)CC[C@]24C)(CO)C)c1                | 6.9 | 6.8 | 6.85 |
| 464 | MolPort-002-522-484 | O=C(N[C@H](Cc1c[nH]c2cccc21)C(O)=O)CCC=3C(Oc4c(c5c(c6c(o5)CCCC6)cc4C3C)C)=O                      | 6.9 | 6.8 | 6.85 |
| 465 | SN00267894          | O=C1c2ccc3c(c2OC(c4cc(OC)cc(OC)c4)=C1OC)cco3                                                     | 6.9 | 6.8 | 6.85 |
| 466 | ZINC08791835        | O=C(N[C@H]([C@@H](CC)C)C(=O)NCCCOC[C@H]1C(S[C@@H]2c3cccc3C(=O)N21)(C)C                           | 6.9 | 6.8 | 6.85 |
| 467 | ZINC20466689        | O[C@H]1[C@@H](CC[C@]2(CC[C@H](NC(=O)C3CC3)[C@@H]([C@@H]12)C)C)[C@@H](C(=O)N4CCCC4)C              | 6.9 | 6.8 | 6.85 |
| 468 | SN00073847          | [O+]=C1c2cccc2OC(NC(=O)c3ccc3)=C1c4ccc(OC)c(OC)c4                                                | 6.9 | 6.8 | 6.85 |
| 469 | ZINC38564389        | O=C1CC[C@@]2([C@@H](C1(C)C)CC[C@@]3([C@H]2C(=O)C=C4[C@]3(CCC5(CC[C@](C[C@H]45)(C)C(OC)=O)C)C)C)C | 6.8 | 6.9 | 6.85 |
| 470 | 7338                | O=C(N[C@H]1C[C@H]([NH+](C1)C)c2nc(no2)-c3ccc4cccc4c3)c5ccccn5                                    | 6.8 | 6.9 | 6.85 |
| 471 | ZINC02150013        | Fe1cccc(COe2ccc3c(OC(=O)C(=C3)CCC(OCC)=O)c2)c1                                                   | 6.8 | 6.9 | 6.85 |
| 472 | ZINC20411593        | OC=1C(=O)N(CCN(C)C)[C@@H](c2c(OC)ccc(OC)c2)C1C(=O)c3cc4cccc(OC)c4o3                              | 6.8 | 6.9 | 6.85 |
| 473 | MolPort-007-673-275 | Clc1ccc(CCNC(=O)c2nccn2CC(=O)c3ccc(OC)cc3)cc1                                                    | 6.8 | 6.9 | 6.85 |
| 474 | ZINC01648045        | Br1ccc2c(c3c([nH]2)C(=O)N(CC3)Cc4ccc(Cl)cc4)c1                                                   | 6.8 | 6.9 | 6.85 |
| 475 | ZINC02442084        | Clc1cccc(COe2ccc3C(=O)C(Oe4cccc4OC)=C(Oc3c2)C)c1                                                 | 6.8 | 6.9 | 6.85 |
| 476 | 6277                | Clc1c(F)ccc(C(=O)N[C@@H]2C=C[C@H](c3c(nn(Cc4cccc4)c3C)C)C2)c1                                    | 6.7 | 7.0 | 6.85 |
| 477 | ZINC13729784        | O=C1c2cccc2N=CN1CC(=O)Nc3ccc4c(c(c(o4)C(=O)c5cccc5)C)c3                                          | 6.7 | 7.0 | 6.85 |
| 478 | MolPort-028-856-572 | O=C(c1ccc(OC)c(OC)c1)COe2ccc3c(c(-c4cc(OC)c(OC)c(OC)c4)co3)c2                                    | 6.7 | 7.0 | 6.85 |
| 479 | ZINC18046579        | FC(F)(F)c1c(c([nH]n1)-c2ccc(OCC(=O)N[NH3+])cc2O)-c3ccc(OC)cc3                                    | 6.7 | 7.0 | 6.85 |

|     |                     |                                                                                       |     |     |      |
|-----|---------------------|---------------------------------------------------------------------------------------|-----|-----|------|
| 480 | SN00147976          | FC(F)(F)c1c(-e2ccc(OC)cc2)c(on1)-c3ccc(OCC)cc3O                                       | 6.7 | 7.0 | 6.85 |
| 481 | SN00283805          | O=C(c1c(OC)cc(OC)cc1OC)/C=C/c2cc(OC)c(OC)cc2OC                                        | 6.7 | 7.0 | 6.85 |
| 482 | 163768-83-0         | Clc1c(c(Cl)c(O)c(C(=O)c2c(c(O)cc(O)c2CC=C(C)C)C=O)c1O)C                               | 6.7 | 7.0 | 6.85 |
| 483 | ZINC40309002        | Br1cccc2e1cen2CCC(=O)N[C@H]([C@H](CC)C)C([O-])=O                                      | 6.7 | 7.0 | 6.85 |
| 484 | SN00084157          | O=C1C(=O)[C@H-]([C@@H](N1CCOC)c2ccc(O)c(OC)c2)C(=O)c3ccc(o3)C                         | 6.7 | 7.0 | 6.85 |
| 485 | ZINC02092165        | Fe1cccc(CO)c2ccc3c(OC(=O)C(=C3C)CCC(OCC)=O)c2C)c1                                     | 6.6 | 7.1 | 6.85 |
| 486 | ZINC02151660        | O=C1C(=C(c2ccc(OC)c3cccc(c3)C)c(c2O1)C)C)CC([O-])=O                                   | 6.5 | 7.2 | 6.85 |
| 487 | ZINC06407719        | Oc1cc(OC)cc(OC)c1C(=O)/C=C/c2ccccc2OC                                                 | 6.7 | 6.9 | 6.80 |
| 488 | ZINC31157673        | Oc1c(c(cc(O)c1Ce2c(O)cc(c(e2O)C=O)C)C)C                                               | 6.7 | 6.9 | 6.80 |
| 489 | MolPort-005-950-245 | O=C(N1C2c([nH]en2)C[C@H]1c3nc(no3)-c4ccc5ccccc5c4)C6ccc(OC)cc6                        | 6.7 | 6.9 | 6.80 |
| 490 | SN00145601          | Br1cc2c(c(c(o2)C)C(OCCOC)=O)cc1OCc3cccc([N+])([O-])=O)c3                              | 6.7 | 6.9 | 6.80 |
| 491 | ZINC40313355        | O=C(c1c2ccccc2n(c1C)C)CN3C(=O)C=CC(=N3)c4ccc4                                         | 6.7 | 6.9 | 6.80 |
| 492 | ZINC11866426        | O=C(Nc1cc(ccc1OC)C)c2c(oc3ccc(OC)cc23)C                                               | 6.7 | 6.9 | 6.80 |
| 493 | MolPort-002-535-447 | O=C1c2c(OC)c(OC)ccc2-c3c4c(c5cc(O[C@H](C(=O)Nc6ccc(OC)c(OC)c6)C)ccc5n14)ccn3          | 6.7 | 6.9 | 6.80 |
| 494 | ZINC02319078        | Fe1c(F)c(F)c(F)c(F)c1OCC(Oc2ccc3c(c(c(o3)C)C(OC)=O)c2)=O                              | 6.7 | 6.9 | 6.80 |
| 495 | ZINC09410228        | Clc1cc(F)ccc1COc2ccc(-c3c(-c4ccc(OC)cc4)(no3)C)c(O)c2                                 | 6.7 | 6.9 | 6.80 |
| 496 | ZINC15674316        | Fe1c(C)ccc(-c2noc(n2)[C@@H]3C[C@H](O)C[NH+]3C4c([nH]c5ccccc54)c1                      | 6.8 | 6.8 | 6.80 |
| 497 | ZINC02122012        | O=C1C=C(CCC)c2c(O1)c(c3c(CN(CO3)c4c(C)ccc(c4)C)c2)C                                   | 6.8 | 6.8 | 6.80 |
| 498 | ZINC08740407        | Br1ccc(OCc2cccn2)c([C@@H]3c4c(C[C@H](N3)C(O)=O)c5ccccc5[nH]4)c1                       | 6.8 | 6.8 | 6.80 |
| 499 | SN00147906          | FC(F)(F)c1c(c(on1)-c2ccc(O)cc2O)-c3ccc(OC)cc3                                         | 6.6 | 7.0 | 6.80 |
| 500 | ZINC03846578        | O=C(C[C@@H](Nc1ccc(N)cc1)c2ccc3c(OCO3)c2)C=4C(=O)c5ccccc5N(C4[O-])C                   | 6.6 | 7.0 | 6.80 |
| 501 | SN00290874          | Oc1c(OC)cc2CCN([C@H]3C4ccc(O)c(c4)-c5c(OC)ccc(CC6c7cc(Oc1c23)c(OC)cc7CCN6)c5)C        | 6.6 | 7.0 | 6.80 |
| 502 | ZINC02126974        | O=C(NCCc1ccc(OC)cc1)c2cc3c4ccccc4[nH]c3c(n2)-c5cc(OC)ccc5OC                           | 6.6 | 7.0 | 6.80 |
| 503 | ZINC05389290        | Oc1cc(OC)ccc1-c2c(-c3ccc(OC)c(OC)c3)c(no2)C                                           | 6.5 | 7.1 | 6.80 |
| 504 | MolPort-002-535-319 | O=C(NCCc1ccc(OC)cc1)[C@@H](Oe2ccc3c(c4ccnc5-c6ccc6C(=O)n3c54)c2)C                     | 6.5 | 7.1 | 6.80 |
| 505 | ZINC35466154        | O[C@H]([C@H](CCC/C(=C/Cc1c(OC)c(e2COC(=O)c2c1O)C)C)C)CC([O-])=O                       | 6.5 | 7.1 | 6.80 |
| 506 | ZINC31164529        | O[C@@H](C/C=C(/CCC=C(C)C)C)/C(=C/Cc1c(O)ccc(c1)C([O-])=O)C                            | 6.5 | 7.1 | 6.80 |
| 507 | MolPort-005-948-910 | O[C@@H]1C[C@H](N(C1)Ce2ccc(OC)cc2)c3nc(no3)CS(=O)(=O)c4ccc(cc4)C                      | 6.5 | 7.1 | 6.80 |
| 508 | ZINC13623573        | Fe1ccc(C(=O)Nc2c3ccccc3oc2C4=CC(Oc5ccc(C(C)C)cc54)=O)cc1                              | 6.9 | 6.6 | 6.75 |
| 509 | MolPort-002-526-623 | Clc1cccc(CNC(=O)c2cc3c4ccccc4[nH]c3c(n2)-c5ccc(OC)c(OC)c5)c1                          | 6.9 | 6.6 | 6.75 |
| 510 | ZINC02200212        | Fe1c(F)c(F)c(F)c(CO)c2ccc3c(cc2CC)C(=O)C(c4ccc5c(OCCO5)c4)=C(O3)C)c1F                 | 6.9 | 6.6 | 6.75 |
| 511 | ZINC01799112        | Clc1cccc(CO)c2ccc3C=C(c4nc5ccccc5s4)C(Oc3c2)=O)c1                                     | 6.9 | 6.6 | 6.75 |
| 512 | ZINC02153244        | O=C1C2=C([C@H](N1CCc3ccc(OC)c(OC)c3)c4ccc(O)c(OC)c4)C(=O)c5ccccc5O2                   | 6.8 | 6.7 | 6.75 |
| 513 | SN00017085          | O=S(=O)(NC[C@@H]1C[C@@H]2CC[NH+]1)C[C@H]2c3cc(nn3C)-c4ccc(OC)c(OC)c4)Cc5ccccc5        | 6.8 | 6.7 | 6.75 |
| 514 | MolPort-009-649-082 | O=C1C[C@H](c2c(N1)c(en2-c3ccc(OC)cc3OC)C(O)=O)c4ccc(OC)c(O)c4                         | 6.8 | 6.7 | 6.75 |
| 515 | MolPort-002-516-371 | S=C1N(C(=O)C([C@@H]2c3cc(OC)c(OC)cc3CCN2C(=O)C)=C(O)N1c4ccccc4)c5ccccc5               | 6.7 | 6.8 | 6.75 |
| 516 | ZINC04237030        | O[C@H]1CCC2([C@@H](c3c(sc(n3)NC(=O)CCCC)C[C@H]2[C@@]1(CO)C)CC(=O)N(CC=C)C)C           | 6.7 | 6.8 | 6.75 |
| 517 | ZINC15676415        | O=S(=O)(N1Cc2c(nen2Cc3ccc(OC)cc3)C[C@H]1C(OC)=O)c4ccccc4ccnc54                        | 6.7 | 6.8 | 6.75 |
| 518 | ZINC02118808        | O=C1C(=C(c2cc3c(OCN(C3)c4ccccc4CC)c(c2O1)C)C)C                                        | 6.7 | 6.8 | 6.75 |
| 519 | ZINC01799111        | Fe1c(F)c(F)c(F)c(F)c1OCC(Oc2ccc3c(c(c(o3)C)C(OC(C)C)=O)c2)=O                          | 6.7 | 6.8 | 6.75 |
| 520 | SN00332856          | O=C1C=Cc2c(O1)cc(OC)c([C@H]3C=C(CC[C@]3)/C=C/c4c(OC)cc5c(c4)C=CC(O5)=O)C)C)c2         | 6.7 | 6.8 | 6.75 |
| 521 | ZINC02667598        | Clc1c(Cl)ccc(CO)c2ccc3C(=O)C(c4ccc(OC)c(OC)c4)=C(Oc3c2)C)c1                           | 6.7 | 6.8 | 6.75 |
| 522 | ZINC12860017        | S=C(N(CCc1cc2c(OCO2)c(OC)c1/C=C/3C(=O)NC(=O)N(CCCCC)C3=O)C)NC                         | 6.7 | 6.8 | 6.75 |
| 523 | 20464               | O[C@H]1[C@@H](CC[C@]2(CC[C@H](NC(=O)COC)[C@H]([C@@H]12)C)C)[C@H](C(=O)N(Cc3ccccc3)C)C | 6.6 | 6.9 | 6.75 |
| 524 | ZINC68575016        | FC(F)(F)C(F)(C(=O)Nc1cc(ccc1OC)C(F)(F)F)C(F)(F)F                                      | 6.6 | 6.9 | 6.75 |
| 525 | ZINC68574667        | FC(F)(O[C@])(F)(C(=O)Nc1cc(ccc1OC)C(F)(F)F)C(F)(F)F)C(F)(F)F)C(F)(F)F                 | 6.6 | 6.9 | 6.75 |

|     |                     |                                                                                     |     |     |      |
|-----|---------------------|-------------------------------------------------------------------------------------|-----|-----|------|
| 526 | SN00148474          | FC(F)(F)1c(-e2ccc(OC)cc2)c(on1)-c3ccc(OCc4ccc([N+](O-)=O)cc4)cc3O                   | 6.6 | 6.9 | 6.75 |
| 527 | ZINC04270713        | Fe1cccc(C(=O)N2C[C@H](N(S(=O)(=O)C)CC2)C(OC)=O)c1                                   | 6.6 | 6.9 | 6.75 |
| 528 | ZINC70707164        | Fe1ccc(CNC(=O)e2cccc2N3C(=O)N4[C@@H](c5c(C[C@H]4C3=O)c6cccc6[nH]5)c7ccc(OC)cc7)c1   | 6.6 | 6.9 | 6.75 |
| 529 | ZINC68589892        | O=C1C(=C([O-])N(c2cccc12)c3cccc3)/C(=N/c4ccc(O)cc4)C                                | 6.6 | 6.9 | 6.75 |
| 530 | MolPort-044-810-768 | Br1c2c(OCO2)c(OC)c3C=C(N(Cc13)C)C4=CC(Oc5ccc(OC)cc54)=O                             | 6.6 | 6.9 | 6.75 |
| 531 | 19205               | Fe1ccc(C(=O)NCC2(C[C@H](O)[C@@H](O)C2)COC)cc1                                       | 6.5 | 7.0 | 6.75 |
| 532 | ZINC04222564        | Fe1cc(F)cc(CNC(=O)C[C@@H]2c3e(sc(n3)NCC=C)C[C@H]4[C@]([C@@H](O)CCC24C)(CO)C)c1      | 6.5 | 7.0 | 6.75 |
| 533 | MolPort-035-700-267 | O=C(N1CCN(CC1)C)C[C@@H](c2c(O)c(O)c(O)c3C(=O)C=C(Oc32)c4cccc4)c5ccc(OC)c(OC)c5      | 6.5 | 7.0 | 6.75 |
| 534 | MolPort-002-511-055 | Nc1c(c(nc(n1)C)c2ccc(OC)c(OC)c2)Cc3ccc(OC)c(OC)c3)-c4ccc(OC)c(OC)c4                 | 6.5 | 7.0 | 6.75 |
| 535 | ZINC02135653        | O=C1C(=C(c2ccc(OC)c(OC)c2O1)C)CC(=O)N[C@@H](Cc3c[nH]c4ccc(O)cc43)C([O-])=O          | 6.5 | 7.0 | 6.75 |
| 536 | MolPort-000-487-182 | O=C1C2=C(OC(N)=C([C@H]2c3ccc(OC)c(OC)c3OC)C#N)C=C(N1Cc4ccc(OC)c(OC)c4)C             | 6.4 | 7.1 | 6.75 |
| 537 | MolPort-028-856-091 | O=C(N1CCN(CC1)c2cccc(OC)c2)Cn3c4cccc4c5CCN6C(=O)c7cccc7N=C6c53                      | 6.9 | 6.5 | 6.70 |
| 538 | ZINC02666313        | Clc1cccc(COe2ccc3C(=O)C(Oe4ccc(cc4)C(OCC)=O)=COe3c2)c1                              | 6.9 | 6.5 | 6.70 |
| 539 | MolPort-035-700-717 | O=C(c1ccc(OC)c(OC)c1)COe2ccc3c(c(-c4ccc(OC)c(OC)c4)co3)c2                           | 6.7 | 6.7 | 6.70 |
| 540 | MolPort-002-528-533 | O=C(N[C@@H](Cc1c[nH]c2ccc(O)cc21)C(O)=O)COc3ccc4C(CCC)=CC(Oc4c3C)=O                 | 6.7 | 6.7 | 6.70 |
| 541 | MolPort-035-699-980 | O=C(N1CCc2c([nH]c3cccc32)C1)C[C@@H](C4=COc5ccc(OC)cc5C4=O)C6=C(O)C(=O)C=C(O6)COC    | 6.7 | 6.7 | 6.70 |
| 542 | MolPort-021-746-036 | Fe1ccc2c(c3CN(Cc3[nH]2)C(=O)COc4ccc5c(OC(=O)C(=C5)C)c4)c1                           | 6.7 | 6.7 | 6.70 |
| 543 | SN00075071          | O=C1C(=C2C[C@@H](Sc3cccc3N2)c4cccc(OC)c4)=C([O-])C=C(O1)C                           | 6.5 | 6.9 | 6.70 |
| 544 | ZINC05163437        | FC(F)(F)1c1c(-e2ccc(OC)cc2)c(n[nH]1)-c3ccc(OCC)cc3O                                 | 6.5 | 6.9 | 6.70 |
| 545 | MolPort-028-856-192 | O=C1C([C@@H](CC(OC)=O)c2cc(OC)c(O)c(OC)c2)=C(NN1)Cc3ccc(OC)cc3                      | 6.5 | 6.9 | 6.70 |
| 546 | 18636               | O=C(N1CCOC[C@H](Oe2cccc(n2)C)C1)c3cc(nn3)C                                          | 6.5 | 6.9 | 6.70 |
| 547 | MolPort-044-811-170 | Br1c2c(OCO2)c(OC)c3C=C(N(Cc13)C)C4=CC(Oc5ccc(cc54)C)=O                              | 6.5 | 6.9 | 6.70 |
| 548 | 200936-84-1         | O[C@H](CCCCC(=O)C)=1C(O[C@]2(C1C(=C3C=C(OC=C3[C@@H]2O)C)C(=O)C)=O)C                 | 6.4 | 7.0 | 6.70 |
| 549 | SN00306304          | O=C1[C@H](OC(=O)C)C[C@]2([C@@H](C(CC[C@@H]2C1(C)C)=C)COc3c(OC)cc4C=CC(Oc4c3OC)=O)C  | 6.4 | 7.0 | 6.70 |
| 550 | ZINC02122747        | O=C1C(=C(c2cc3c(OCN(c4c(cc(cc4)C)C)C3)c(c2O1)C)C)Cc5cccc5                           | 6.4 | 7.0 | 6.70 |
| 551 | ZINC04267149        | Clc1ccc([C@@H]([NH2+])C=2C(=O)N(N(C2)C)c3cccc3)CC(=O)C=4C(=O)N(c5cccc5C4O)C)cc1     | 6.4 | 7.0 | 6.70 |
| 552 | ZINC08918342        | Clc1cccc(COe2ccc3C(=C(CCC(=O)N4CC[C@]5(O)CCCC[C@H]5C4)C(Oc3e2C)=O)C)c1              | 6.8 | 6.6 | 6.70 |
| 553 | ZINC02146856        | O=C(c1c2cc(OC)ccc2n(c1)C)COc3ccc4-c5ccc(OC)cc5C(Oc4c3C)=O                           | 6.8 | 6.6 | 6.70 |
| 554 | MolPort-000-846-216 | O=C(NCCc1c[nH]c2cc(OC)ccc21)CC=3C(Oe4cc5c(c(c(o5)C)C)cc4C3C)=O                      | 6.8 | 6.6 | 6.70 |
| 555 | ZINC02094262        | O=C1c2c(OC(=C1c3ccc4c(OCCO4)c3)C)cc(OCc5ccc(cc5)C)c(CC)c2                           | 6.8 | 6.6 | 6.70 |
| 556 | MolPort-002-518-378 | O=S(=O)(N[C@@H](CC(C)C)C(Oe1ccc2-c3cccc3C(Oe2c1C)=O)=O)c4ccc(cc4)C                  | 6.6 | 6.8 | 6.70 |
| 557 | ZINC09033642        | O[C@H](CCCC)/C=C/[C@@H]1CCC(=O)[C@@H]1CCCCC(=O)NCe2cccc(OC)c2OC                     | 6.6 | 6.8 | 6.70 |
| 558 | MolPort-002-524-112 | O=C(NCc1cccc1OC)c2cc3c4cccc4[nH]e3c(n2)-c5cccc(OC)c5                                | 6.6 | 6.8 | 6.70 |
| 559 | ZINC06755168        | FC(F)(F)1c1c(c(on1)-c2ccc(O)cc2O)-c3ccc(OC)c(OC)c3                                  | 6.6 | 6.8 | 6.70 |
| 560 | ZINC20467205        | O[C@H]1[C@H](CC[C@]2(CC[C@H](NC(=O)c3cccn3)[C@@H]([C@H]12)C)C)[C@@H](C(=O)N4CCCC4)C | 6.6 | 6.8 | 6.70 |
| 561 | ZINC00487450        | O=C1C(Oe2cccc2OC)=COc3c1ccc(OC(=O)C)c3C                                             | 6.6 | 6.8 | 6.70 |
| 562 | MolPort-035-701-927 | Oe1cc(C2=CC(=O)c3c(O)cc4c([C@H](CC(O4)=O)c5ccc(OC)c(OC(C)C)c5)c3O2)ccc1OC           | 6.6 | 6.8 | 6.70 |
| 563 | ZINC11865237        | Clc1cccc(COe2ccc3C(=O)C(Oe4cccc(OC)c4)=C(Oc3c2)C)c1                                 | 6.6 | 6.8 | 6.70 |
| 564 | ZINC03851657        | Cc1ccc(N2/C(SC(OC)=N2)=C/C=3c4cc(OC)c(OC)cc4CCN3)cc1                                | 6.6 | 6.8 | 6.70 |
| 565 | 149355-75-9         | Oe1cc2c(-c3c(n4CCc5c(OC)c(OC)c(OC)cc5-c4c3-c6ccc(OC)c(OC)c6)C(O2)=O)cc1OC           | 6.6 | 6.8 | 6.70 |
| 566 | ZINC12892682        | O=C(N[C@@H](Cc1c[nH]c2cccc21)C)CC=3C(Oe4c(c5c(cc43)C)c(co5)C)C(=O)                  | 6.9 | 6.4 | 6.65 |
| 567 | ZINC02149868        | Clc1cc2c(OC(=O)C(=C2)C)cc1OC(=O)[C@H](NS(=O)(=O)c3ccc(cc3)C)[C@H](CC)C              | 6.8 | 6.5 | 6.65 |
| 568 | ZINC13609475        | Clc1c(C)cc(COe2ccc3c(OC([NH3+])=C(c4ccc(OC)cc4)C3=O)c2)cc1                          | 6.8 | 6.5 | 6.65 |
| 569 | SN00241623          | Oe1c(OC)cc2c3e1Oe4c(OC)cc5CCN[C@@H](c5c4)Cc6ccc(Oc7c(OC)ccc(C[C@@H]2N(CC3)C)c7)c    | 6.7 | 6.6 | 6.65 |

|     |                     |                                                                                 |     |     |      |
|-----|---------------------|---------------------------------------------------------------------------------|-----|-----|------|
| 570 | SN00101930          | Clc1ccc([C@H]([NH2+])CC[C@H](c2ccc(OC(C)C)cc2)c3ccccc3OC)C)cc1                  | 6.7 | 6.6 | 6.65 |
| 571 | MolPort-028-856-171 | O=C(NCCN(C)C)Cn1c2ccccc2c3CCN4C(=O)c5ccccc5N=C4c31                              | 6.7 | 6.6 | 6.65 |
| 572 | ZINC02667544        | Br1ccc(C2=COc3cc(OCc4cccc(Cl)c4)ccc3C2=O)cc1                                    | 6.7 | 6.6 | 6.65 |
| 573 | ZINC02217015        | FC(F)(F)C(NC(=O)NC=1C(=O)N(N(C1C)C)c2ccccc2)(C(F)(F)F)C                         | 6.7 | 6.6 | 6.65 |
| 574 | ZINC12603403        | Fe1ccc(-n2c(c([C@H]3C=C[C@H]([NH2+])C4cccc4)C3)c(n2)C)C)cc1                     | 6.6 | 6.7 | 6.65 |
| 575 | ZINC02152082        | Fe1ccccc(COe2ccc3c(OC(=O)C(=C3C)CC(OC)=O)c2)c1                                  | 6.6 | 6.7 | 6.65 |
| 576 | ZINC03846418        | O=C(O[C@H]1C[C@H](CC[C@H]1C(C)C)C(CCC)(C)C(=O)C                                 | 6.6 | 6.7 | 6.65 |
| 577 | MolPort-002-518-659 | O=C(Nc1ccc2c(c3ccccc3n2CC)c1)COe4ccc5c(OC(=O)C=C5c6ccccc6)c4                    | 6.6 | 6.7 | 6.65 |
| 578 | 143682-17-1         | Oc1ccccc2c3c4CNC(=O)c4c5c6ccccc6n7c5c3n([C@]8([C@H](OC)[C@@H](NC)[C@H]7O8)C)c12 | 6.5 | 6.8 | 6.65 |
| 579 | ZINC20728784        | Clc1ccccc(COe2ccc3c(noc3e2)C4ccc(Cl)cc4)c1                                      | 6.5 | 6.8 | 6.65 |
| 580 | ZINC04023868        | O[C@]1(CC[C@H]2C(CCC[C@]2([C@@H]1CC[C@@](O)(CC)C)C)C)C                          | 6.5 | 6.8 | 6.65 |
| 581 | SN00052039          | Br1ccccc(N2C(=O)c3ccccc3N4C(=O)c5c(OC)c(OC)ccc5[C@@H]24)c1                      | 6.5 | 6.8 | 6.65 |
| 582 | MolPort-002-518-297 | O=C(N1Cc2c(c[C@H]1C(OC)=O)c3ccccc3[nH]2)COe4ccc5c(OC(=O)C(CCCCC)=C5C)c4         | 6.5 | 6.8 | 6.65 |
| 583 | 121819-68-9         | O=C1C(Ne2nc(c(n2C)C3ccc(OC)c(O)c3)Cc4ccc(OC)cc4)=NC(=O)N1C                      | 6.4 | 6.9 | 6.65 |
| 584 | SN00074949          | Oc1ccc([C@H]2CC(=Nc3ccccc3S2)C=4C(OC(=CC4[O-])C)=O)cc1OC                        | 6.4 | 6.9 | 6.65 |
| 585 | SN00049419          | O=C1C2=C(N(C(=O)N1C)N)C(N(C=3e4ccccc4C(=O)C3[C@H]2e5ccc(OC(=O)C)c(OC)c5)C(=O)C  | 6.4 | 6.9 | 6.65 |
| 586 | MolPort-002-533-130 | O=C1c2ccccc2OC(NC(=O)c3ccccc(OC)c3)=C1e4ccc(OC)c(OC)c4                          | 6.3 | 7.0 | 6.65 |
| 587 | ZINC11867349        | Clc1c(Cl)ccc(COe2ccc3C(=C(CC(=O)N4CC[C@]5(O)CCCC[C@@H]5C4)C(Oc3e2C)=O)C)c1      | 6.7 | 6.5 | 6.60 |
| 588 | ZINC11867170        | O[C@]12CCN(C[C@H]2CCCC1)C(=O)CC=3C(Oe4c(c(OCc5ccccc5)C)ccc4C3C)C)=O             | 6.6 | 6.6 | 6.60 |
| 589 | MolPort-028-855-419 | O=C(N1CCN(CC1)e2ccccc2OC)Cn3e4ccccc4e5CCN6C(=O)c7ccccc7N=C6c53                  | 6.6 | 6.6 | 6.60 |
| 590 | ZINC02124948        | O=C1C=C(CC)c2c(O1)c(c3c(CN(CO3)c4c(C)ccc(e4)C)c2)C                              | 6.6 | 6.6 | 6.60 |
| 591 | ZINC04252491        | Oc1cc(OC)cc(OC)c1C(=O)/C=C/c2ccc(OCc3ccccc3)c(OC)c2                             | 6.6 | 6.6 | 6.60 |
| 592 | MolPort-002-151-076 | O=C1c2ccccc2C=3[C@@H]1[C@@H](c4ccc(OC)c(OC)c4)C=5C(=O)N(C(=O)N(C5N3)C)C         | 6.5 | 6.7 | 6.60 |
| 593 | ZINC05389044        | FC(F)(F)c1c(c(on1)-c2ccc(OC)cc2O)-c3ccc(OC)cc3                                  | 6.5 | 6.7 | 6.60 |
| 594 | ZINC02159827        | O=C1C=C(CCCC)c2c(O1)c(c3c(CN(CO3)c4ccccc4C)C)c2)C                               | 6.5 | 6.7 | 6.60 |
| 595 | ZINC02093059        | O=C(OCC)CCC=1C(Oc2c(c(OCc3ccc(cc3)C)C)ccc2C1C)C)=O                              | 6.5 | 6.7 | 6.60 |
| 596 | ZINC04046749        | O=C1C(=C(c2ccc(OCc3ccccc3)C)cc2O1)C)CC([O-])=O                                  | 6.5 | 6.7 | 6.60 |
| 597 | SN00050294          | Fe1ccc(C(=O)Ne2cc(OC)c(OC)cc2Cc3c4cc(OC)c(OC)cc4ccn3)cc1                        | 6.5 | 6.7 | 6.60 |
| 598 | SN00348754          | O=C1C=Cc2ccc(OC)c([C@H]3C=C(CC[C@@]3(C)/C=C/c4c(OC)ccc5C=CC(Oc54)=O)C)c2O1      | 6.5 | 6.7 | 6.60 |
| 599 | ZINC02122508        | O=C1C=C(CCCC)c2c(O1)c(c3c(CN(CO3)c4c(C)ccc(e4)C)c2)C                            | 6.5 | 6.7 | 6.60 |
| 600 | SN00151021          | Clc1ccccc1COe2cc(OC)ccc2-c3c(-e4ccc(OC)cc4)c(no3)C                              | 6.5 | 6.7 | 6.60 |
| 601 | ZINC20762168        | O=C(N1CCc2c([nH]cn2)[C@H]1c3c(OC)ccc(OC)c3)N[C@H](C)C(OC)=O                     | 6.4 | 6.8 | 6.60 |
| 602 | ZINC79189259        | O=C(OCC)[C@@H]1[C@@H](c2ccc(OC)c3ccccc32)C=4C(Oc5ccccc5C4O1)=O                  | 6.4 | 6.8 | 6.60 |
| 603 | ZINC02094763        | Fe1ccccc(COe2ccc3c(OC(=O)C(=C3C)CC(OC)=O)c2)c1                                  | 6.4 | 6.8 | 6.60 |
| 604 | ZINC02148915        | O=C1C(CCC([O-])=O)=C(c2ccc(OCc3ccc(cc3)C)C)cc2O1)C                              | 6.4 | 6.8 | 6.60 |
| 605 | ZINC02133746        | O=C1C=C(c2ccc(OC/C=C(/CCC=C(C)C)C)cc2O1)C                                       | 6.4 | 6.8 | 6.60 |
| 606 | ZINC03846610        | O=C(C[C@H](Nc1cccc1)e2ccc(N(C)C)cc2)C=3C(=O)c4ccccc4N(C3[O-])C                  | 6.4 | 6.8 | 6.60 |
| 607 | MolPort-027-852-780 | Fe1ccc(-e2c([C@@H](NC(=O)c3c(nn3)-e4ccccc4)C)C)c(on2)C(O)=O)cc1                 | 6.4 | 6.8 | 6.60 |
| 608 | ZINC01444304        | O=C(N1c2ccccc2CO[C@@H]1c3ccc(OC)cc3)e4ccccc(OC)c4                               | 6.4 | 6.8 | 6.60 |
| 609 | ZINC02333037        | Clc1ccccc(COe2ccc3C(=O)C(Oc4ccccc4OCC)=COc3e2)c1                                | 6.4 | 6.8 | 6.60 |
| 610 | ZINC14492226        | O[C@H](C=C(C)C)C(=O)/C=C/CC/C(C)=C/CC=1C(Oe2ccccc2C1[O-])C)=O)C                 | 6.3 | 6.9 | 6.60 |
| 611 | ZINC02118316        | O=C1C=2CCCC2c3cc4c(OCN(C4)c5ccccc5C)c(e3O1)C                                    | 6.3 | 6.9 | 6.60 |
| 612 | MolPort-028-856-432 | Oc1cc(O)c2C(=O)C=C(Oc2e1[C@@H](c3ccc4c(ncn4)c3)CC(OC)=O)c5ccccc5                | 6.3 | 6.9 | 6.60 |
| 613 | ZINC02092152        | O=S(=O)(N[C@@H](CCCC)C(Oc1ccc(cc2c1C(=C(C(O2)=O)C)C)=O)c3ccc(cc3)C              | 6.3 | 6.9 | 6.60 |
| 614 | SN00084180          | O=C1C(=O)[C@H-]([C@@H](N1CCOC)c2cc(OC)c(OC)c(OC)c2)C(=O)c3ccccc3                | 6.3 | 6.9 | 6.60 |
| 615 | SN00077068          | Oc1ccc(OC)cc1[C@H]2CC(=Nc3ccccc3S2)C=4C(OC(=CC4[O-])C)=O                        | 6.2 | 7.0 | 6.60 |



|     |                     |                                                                                                                  |     |     |      |
|-----|---------------------|------------------------------------------------------------------------------------------------------------------|-----|-----|------|
| 616 | ZINC02277837        | Fe1c(F)c(F)c(F)c(COe2ccc3c(c(c(o3)C)C(OCCOC)=O)c2)c1F                                                            | 6.2 | 7.0 | 6.60 |
| 617 | ZINC68591828        | Oc1c(OC)cc([C@@H]2CC(=Nc3ccccc3S2)C=4C(=O)c5ccccc5N(C4[O-])C)cc1OC                                               | 6.2 | 7.0 | 6.60 |
| 618 | ZINC38143767        | O[C@@H]1C[C@@]2([C@@]([C@H]1[C@])(O)(C(=O)CCC(O)(C)C)C)(CC(=O)[C@]3([C@@H]4C[C@H](O)C(=O)C(C4=CC[C@H]32)(C)C)C)C | 6.7 | 6.4 | 6.55 |
| 619 | SN00048103          | Oc1cc(OC)c(CCC)cc1-c2c(-c3ccc4c(OCCCO4)c3)c(no2)C                                                                | 6.4 | 6.7 | 6.55 |
| 620 | 20512               | Fe1cc(F)cc(CNC(=O)[C@H]([C@H]2CC[C@]3(CC[C@H](NC(=O)Cc4ccccc4)[C@@H]([C@H]3[C@@H]2O)C)C)C)c1                     | 6.4 | 6.7 | 6.55 |
| 621 | ZINC02094396        | Fe1cccc(COe2ccc3c(OC(=O)C(=C3)CCC([O-])=O)c2)c1                                                                  | 6.4 | 6.7 | 6.55 |
| 622 | ZINC02148668        | O=S(=O)(N[C@@H]([C@@H](CC)C)C(Oc1cc(cc2c1C(CCCC)=CC(O2)=O)C)=O)c3ccc(cc3)C                                       | 6.4 | 6.7 | 6.55 |
| 623 | ZINC02147761        | O=S(=O)(N[C@@H](CC(C)C)C(Oc1ccc2c(OC(=O)C(=C2)C)c1)=O)c3ccc(cc3)C                                                | 6.4 | 6.7 | 6.55 |
| 624 | ZINC02109980        | O=C(c1c2cc(OC)ccc2n(c1C)C)COc3cc4c(C5=C(CCC5)C(O4)=O)cc3CCCCC                                                    | 6.4 | 6.7 | 6.55 |
| 625 | ZINC02666276        | Clc1c(Cl)ccc(COe2ccc3C(=O)C(c4ccccc4)=C(Oc3c2)C)c1                                                               | 6.4 | 6.7 | 6.55 |
| 626 | 10245-81-5          | BrC1c(Br)c(Br)[nH]c1-c2cc(Br)cc(Br)c2O                                                                           | 6.4 | 6.7 | 6.55 |
| 627 | SN00267570          | O=C([C@@H]1[C@@H]([C@@H]([C@H]1C(=O)c2c(O)cc2OC)c3ccc(OC)cc3)c4ccc(OC)cc4)c5c(O)cc(O)cc5OC                       | 6.4 | 6.7 | 6.55 |
| 628 | ZINC12530252        | Fe1ccc(C(=O)N2Cc3c(nen3Cc4ccccc4)C[C@H]2C(OC)=O)cc1                                                              | 6.6 | 6.5 | 6.55 |
| 629 | MolPort-002-527-363 | O=C(NC1c1nccc1)c2cc3c4ccccc4[nH]c3c(n2)-c5cccc(OC)c5                                                             | 6.6 | 6.5 | 6.55 |
| 630 | 115982-21-3         | Oc1c(OC)cc-2c(CCN3c4C(Oc5cc(OC)c(O)cc5-c4c(e23)-c6ccc(OC)c(O)c6)=O)c1                                            | 6.6 | 6.5 | 6.55 |
| 631 | 115982-20-2         | Oc1c(OC)c(OC)cc-2c1CCn3c4C(Oc5cc(O)c(OC)cc5-c4c(e23)-c6ccc(OC)c(OC)c6)=O                                         | 6.6 | 6.5 | 6.55 |
| 632 | MolPort-008-347-150 | O=C(NCCc1c[nH]c2ccc(OC)cc21)Cn3ccc4cc(OC)ccc43                                                                   | 6.5 | 6.6 | 6.55 |
| 633 | ZINC48057066        | Oc1cccc(OC)c1C(=O)/C=C/c2ccccc2OC                                                                                | 6.5 | 6.6 | 6.55 |
| 634 | 7138                | Fe1ccc(-c2noc(n2)[C@@H]3C[C@@H](O)C[NH+]3Cc4ccc(OC)c5ccccc54)cc1                                                 | 6.5 | 6.6 | 6.55 |
| 635 | 12504               | Fe1cccc(NC(=O)NC[C@@H]2C=C([C@H](C[C@H]2C(C)C)CC(=O)N(Cc3nccc3)C)C)c1                                            | 6.5 | 6.6 | 6.55 |
| 636 | ZINC20466733        | Fe1cccc(C(=O)N[C@H]2CC[C@@]3(CC[C@@H]([C@@H](O)[C@@H]3[C@H]2C)[C@@H](C(=O)N4CCCC4)C)C)c1                         | 6.5 | 6.6 | 6.55 |
| 637 | MolPort-002-525-564 | O=C(NC1ccc(cc1)C)c2cc3c4ccccc4[nH]c3c(n2)-c5cc(OC)c(OC)c(OC)c5                                                   | 6.5 | 6.6 | 6.55 |
| 638 | ZINC02148701        | O=C(OC(C)C)N[C@@H](Cc1c[nH]e2ccc21)C(Oc3ccc4C(c5ccc(OC)cc5)=CC(Oc4c3C)=O)=O                                      | 6.5 | 6.6 | 6.55 |
| 639 | MolPort-001-683-717 | O=C(OC(C)C)N[C@@H](Cc1c[nH]e2ccc21)C(Oc3ccc4c(OC(=O)C(Cc5ccccc5)=C4)c3)=O                                        | 6.3 | 6.8 | 6.55 |
| 640 | MolPort-009-649-155 | O=C1C[C@H](c2c(N1)c(cn2-c3ccc(OC)cc3OC)C(O)=O)c4ccc(OC)cc4OC                                                     | 6.3 | 6.8 | 6.55 |
| 641 | ZINC02124986        | O=C1C(=C(c2cc3c(OCN(C3)c4cccc(c4C)C)c(c2O1)C)C)C                                                                 | 6.3 | 6.8 | 6.55 |
| 642 | MolPort-002-520-410 | O=C(N[C@@H](Cc1c[nH]c2ccc21)C(O)=O)[C@H](Oc3ccc4c(OC(=O)C=C4CCCC)c3)C                                            | 6.1 | 7.0 | 6.55 |
| 643 | ZINC02423589        | Clc1cccc(COe2ccc3C(=O)C(c4ccccc4)=COc3c2)c1                                                                      | 6.6 | 6.4 | 6.50 |
| 644 | ZINC20467109        | O[C@H]1[C@@H](CC[C@]2(CC[C@H](NC(=O)CCOC)[C@H]([C@H]12)C)C)[C@H](C(=O)N(CC#N)C)C                                 | 6.5 | 6.5 | 6.50 |
| 645 | MolPort-042-647-992 | Clc1ccc(C(=O)c2ccc3c([C@H](c4ccccc(OC)c4OCCc5ccc(OC)cc5)CC(O3)=O)c2O)cc1                                         | 6.5 | 6.5 | 6.50 |
| 646 | ZINC02424621        | Clc1cccc(COe2ccc3C(=O)C(c4ccccc4)=C(Oc3c2)C)c1                                                                   | 6.5 | 6.5 | 6.50 |
| 647 | ZINC11865561        | O=C(NCCCCC([O-])=O)CCC=1C(Oc2c(C1C)cc3c(oc3C(C)(C)C)c2C)=O                                                       | 6.4 | 6.6 | 6.50 |
| 648 | ZINC09233757        | O=C(N1c2ccccc2NC=3C[C@@H](CC(=O)C3[C@@H]1c4ccc(cc4)C(OC)=O)c5ccccc5)CCCC                                         | 6.4 | 6.6 | 6.50 |
| 649 | ZINC02091929        | O=C(c1c2cc(OC)ccc2n(c1C)C)COc3cc(cc4c3C(CCCC)=CC(O4)=O)C                                                         | 6.4 | 6.6 | 6.50 |
| 650 | ZINC13727702        | O=C(Nc1ccc2c(c(c(o2)C(=O)c3ccc(OC)cc3)C)c1)CCc4cc(OC)no4                                                         | 6.3 | 6.7 | 6.50 |
| 651 | MolPort-002-518-545 | O=C(NCCc1ccc(OC)c(OC)c1)CCC=2C(Oc3cc4c(cc3C2C)c(C)co4)=O                                                         | 6.3 | 6.7 | 6.50 |
| 652 | SN00396633          | O=C1[C@@H](OC(=O)C)[C@]2([C@H](C(CC[C@@]2(C1(C)C)C)=C)COc3c(OC)cc4C=CC(Oc4c3OC)=O)C                              | 6.3 | 6.7 | 6.50 |
| 653 | ZINC02148113        | O=C1C(CCC([O-])=O)=C(c2ccc(OCc3ccccc3)C)cc2O1)C                                                                  | 6.3 | 6.7 | 6.50 |
| 654 | ZINC02116736        | O=C1C=C(c2ccccc2)c3c(O1)c(c4c(CN(CO4)c5c(C)ccc(c5)C)c3)C                                                         | 6.3 | 6.7 | 6.50 |
| 655 | ZINC68569482        | ClS(=O)(=O)c1ccc(OCC)c(C2=Nc3c(nn(c3C(=O)N2)C)C(C)C)c1                                                           | 6.3 | 6.7 | 6.50 |
| 656 | SN00077982          | O=C1[C@@H-]([C@H](N(CCOC)C1=O)c2ccc(OC)c(OC)c2)C(=O)c3ccccc3                                                     | 6.2 | 6.8 | 6.50 |
| 657 | MolPort-028-854-753 | Oc1ccc2C(=O)C(c3ccc(O)cc3)=COc2c1[C@H](c4ccc(OC)c(OC)cc4OC)CC(OC)=O                                              | 6.2 | 6.8 | 6.50 |
| 658 | ZINC00480646        | O=C1C2=C(N(C(=O)C)[C@@H]2c3ccc(OC)c(OC)c3)C)CC(C1)(C)C                                                           | 6.2 | 6.8 | 6.50 |
| 659 | ZINC11866575        | O=C1C=2CCCC2c3c(O1)cc(OCc4cc(OC)c(OC)c4)c(CCCCC)c3                                                               | 6.1 | 6.9 | 6.50 |
| 660 | 3037                | Oc1c(c(OC)c(c(c1C)C)C(Oc2c(c(OC)c(c(c2C)C)C([O-])=O)C)=O)C                                                       | 6.1 | 6.9 | 6.50 |

|     |                     |                                                                                           |     |     |      |
|-----|---------------------|-------------------------------------------------------------------------------------------|-----|-----|------|
| 661 | ZINC04046044        | Clc1c(Cl)ccc(COe2ccc3c(OC(=O)C(CCC([O-])=O)=C3C)e2)c1                                     | 6.1 | 6.9 | 6.50 |
| 662 | ZINC02148012        | FC(F)(F)c1cccc(COe2ccc3C(=C(CCC(OCC)=O)C(OCe3c2C)=O)C)c1                                  | 6.5 | 6.4 | 6.45 |
| 663 | ZINC09357294        | FC(F)(F)c1c(c(n[nH]1)-c2ccc(OC)cc2O)-c3ccc(OC)cc3                                         | 6.4 | 6.5 | 6.45 |
| 664 | SN00092731          | O=C(c1ccc(OC)c(c1)C)[C@@H]-2C(=O)C(=O)N([C@H]2c3cc(OC)c(OC)c(OC)e3)CCOC                   | 6.4 | 6.5 | 6.45 |
| 665 | ZINC04222564        | Fe1cc(F)cc(CNC(=O)C[C@H]2c3c(sc(n3)NCC=C)C[C@H]4[C@@]([C@@H](O)CC[C@]24C)(CO)C)c1         | 6.4 | 6.5 | 6.45 |
| 666 | SN00107363          | Bre1ccc(C(=O)Nc2cc(OC)c(OC)cc2Cc3c4cc(OC)c(OC)cc4cn3)cc1                                  | 6.4 | 6.5 | 6.45 |
| 667 | ZINC02151928        | O=C1[C@@H]2Cc3c4cccc4[nH]c3[C@H](N2C(=O)CN1CCCO)c5cc(OC)c(OC)c(OC)c5                      | 6.4 | 6.5 | 6.45 |
| 668 | MolPort-044-180-902 | Oc1c(c2c(Cc3cccc3)=CC(O2)=O)cc1CN(C[C@@H]4CCCC5CCCC[C@H]45)CCCO)C                         | 6.2 | 6.7 | 6.45 |
| 669 | SN00080681          | O=C1c2cccc2OC(NC(=O)c3cccc(OC)e3)=C1c4cc(OC)c(OC)c(OC)c4                                  | 6.2 | 6.7 | 6.45 |
| 670 | ZINC02120791        | Clc1ccc(-c2oc3cc4c(C(=C(CC(=O)N[C@@H]([C@H](CC)C)C([O-])=O)C(O4)=O)C)cc32)cc1             | 6.2 | 6.7 | 6.45 |
| 671 | SN00376520          | O[C@H]1[C@@H](NC)C[C@H]2n3c4ccc(O)cc4c5c6C(=O)NCc6c7c8cccc8n([C@]1(O2)C)c7e53             | 6.2 | 6.7 | 6.45 |
| 672 | SN00333183          | O=C1CC[C@@]2([C@H](C(CC[C@@]2(C1(C)C)C)=C)COe3c(OC)cc4C=CC(Oe4c3OC)=O)C                   | 6.2 | 6.7 | 6.45 |
| 673 | 189083-78-1         | Oc1c(OC)ccc(-c2e3-c4cc(OC)c(O)cc4OC(=O)c3n5CCc6c(OC)c(OC)c(OC)cc6-c25)c1                  | 6.2 | 6.7 | 6.45 |
| 674 | ZINC02152224        | O=C(c1c2cc(OC)ccc2n(c1C)C)COe3ccc4c(OC(=O)C=C4CCCC)e3C                                    | 6.2 | 6.7 | 6.45 |
| 675 | SN00294537          | Oc1ccc2cc1-c3c(OC)ccc(C[C@@H]4c5cc(Oe6c(OC)c(OC)cc7CCN([C@H](c67)C2)C)c(OC)cc5CCN4)c3     | 6.2 | 6.7 | 6.45 |
| 676 | ZINC02092882        | Clc1cccc(COe2ccc3c(OC(=O)C(=C3C)CCC([O-])=O)e2C)c1                                        | 6.2 | 6.7 | 6.45 |
| 677 | MolPort-044-543-486 | OC=1C(=O)C=C(OC1[C@@H](CC(=O)NCCN(C)C)c2ccc(O)c(OC)c2)C                                   | 6.0 | 6.9 | 6.45 |
| 678 | ZINC02148765        | O=C1C(=C(c2ccc(OCc3cc(cc3)C)C)c(c2O1)C)C)CC([O-])=O                                       | 5.9 | 7.0 | 6.45 |
| 679 | SN00333183          | O=C1CC[C@@]2([C@H](C(CC[C@@]2(C1(C)C)C)=C)COe3c(OC)cc4C=CC(Oe4c3OC)=O)C                   | 6.3 | 6.6 | 6.45 |
| 680 | ZINC06058691        | O=S(=O)(Nc1cc(OC)c(OC)cc1Cc2c3cc(OC)c(OC)cc3cn2)e4ccc(OC)c5ccccc54                        | 6.3 | 6.6 | 6.45 |
| 681 | ZINC68575391        | FC(F)(C(F)(F)O[C@@](F)(C(F)(F)F)/C(O)=N/c1c(F)c(F)c(F)c1F)C(F)(F)F                        | 6.3 | 6.6 | 6.45 |
| 682 | ZINC06075836        | Clc1cc(Cl)ccc1CCNC(=O)c2cc3c4cccc4[nH]c3c(n2)C                                            | 6.3 | 6.6 | 6.45 |
| 683 | SN00366689          | O[C@@H]1CC[C@@]2([C@@H](C=CC[C@H]2C1(C)C)C)COe3c(OC)cc4C=CC(Oe4c3OC)=O)C                  | 6.3 | 6.6 | 6.45 |
| 684 | ZINC02095090        | O=S(=O)(N[C@@H]([C@@H](CC)C)C(Oe1ccc2c(OC(=O)C=3CCCC23)c1)=O)c4ccc(cc4)C                  | 6.3 | 6.6 | 6.45 |
| 685 | MolPort-027-718-092 | O=C(NCCN(C)C)CCn1c2cccc2c3CCN4C(=O)c5ccccc5N=C4c31                                        | 6.3 | 6.6 | 6.45 |
| 686 | ZINC30882130        | Fe1ccc(C(=O)NC[C@@H]2C=C([C@@H](C[C@@H]2C(C)C)CC(=O)Nc3cccc3)C)cc1                        | 6.1 | 6.8 | 6.45 |
| 687 | ZINC20466245        | O[C@H]1[C@H](CC[C@@]2(CC[C@H](NC(=O)c3ccc(OC)cc3)[C@@H]([C@@H]12)C)C)[C@H](C(=O)N4CCCC4)C | 6.5 | 6.3 | 6.40 |
| 688 | ZINC02125435        | Bre1ccc(N2COe3c(c4c(cc3C2)C(C)=C(C(O4)=O)C)C)c(C)c1                                       | 6.4 | 6.4 | 6.40 |
| 689 | ZINC02227306        | Clc1cccc(COe2ccc3C(=O)C(c4ccc(OC)cc4)=COe3e2)c1                                           | 6.4 | 6.4 | 6.40 |
| 690 | MolPort-038-386-398 | Clc1ccc(-c2c(c(on2)[C@H](O)C)C(=O)N(CCc3cccn3)C)cc1                                       | 6.4 | 6.4 | 6.40 |
| 691 | MolPort-028-855-303 | O=C1C([C@H](CC(OC)=O)C2=COe3cccc3C2=O)=C(NN1)Cc4ccc(OC)cc4                                | 6.4 | 6.4 | 6.40 |
| 692 | MolPort-002-513-842 | O=C(N[C@H](Cc1c[nH]e2cccc21)C(O)=O)[C@H](Oe3ccc4c(OC(=O)C=C4CC)e3)C                       | 6.3 | 6.5 | 6.40 |
| 693 | MolPort-000-847-367 | O=C(NCCc1c[nH]c2cc(OC)ccc21)COe3ccc4c(OC(=O)C(=C4C)C)e3                                   | 6.3 | 6.5 | 6.40 |
| 694 | MolPort-001-573-006 | Clc1ccc(C(=O)Nc2cc(OC)c(OC)cc2Cc3c4cc(OC)c(OC)cc4cn3)cc1                                  | 6.3 | 6.5 | 6.40 |
| 695 | MolPort-028-855-404 | O=C1C[C@H](c2c(O1)cc(OC)c3C(=O)C=C(Oc32)c4cccc4)c5cc(OC)c(OC)c(OC)c5                      | 6.2 | 6.6 | 6.40 |
| 696 | ZINC04236557        | Fe1cc(F)cc(CNC(=O)C[C@H]2[C@@H](O)CC[C@H]3[C@@]([C@@H](OC(=O)NCC)CC[C@@]23C)(CO)C)c1      | 6.2 | 6.6 | 6.40 |
| 697 | ZINC20761201        | O=C(N1CCc2e([nH]cn2)[C@H]1c3cccc(OC)e3)N[C@H]([C@@H](CC)C)C(OC)=O                         | 6.2 | 6.6 | 6.40 |
| 698 | 62008-00-8          | Br[C@H]1CCCC([C@H](C1(C)C)Cc2c(O)cc(Br)c(OC)c2)=C                                         | 6.2 | 6.6 | 6.40 |
| 699 | ZINC01902806        | FC(F)(F)c1cccc(COe2ccc3c(OC(=O)C=C3c4ccc(OC)cc4)e2)c1                                     | 6.2 | 6.6 | 6.40 |
| 700 | ZINC35466060        | O=C1C2=C([C@H](OC)[C@@H](OC(=O)C=C1C=C1C)[C@@H]3(CCC[C@]23C)(C)C)CN1[C@@H](C)C([O-])=O    | 6.1 | 6.7 | 6.40 |
| 701 | SN00074324          | O=C1c2cccc2C=3[C@H]1[C@@H](c4ccc(OC)c(OC)c4)C=5C(=O)N(C(=O)N(C5N3)C)C                     | 6.1 | 6.7 | 6.40 |
| 702 | ZINC30880470        | Fe1ccc(CNC(=O)C[C@H]2C(=C[C@H]([C@H](C2)C(C)C)CNC(=O)CCC([O-])=O)C)cc1                    | 6.1 | 6.7 | 6.40 |
| 703 | SN00092731          | O=C(c1ccc(OC)c(c1)C)[C@@H]-2C(=O)C(=O)N([C@H]2c3cc(OC)c(OC)c(OC)e3)CCOC                   | 6.0 | 6.8 | 6.40 |
| 704 | ZINC02093739        | O=C(c1c2cccc2n(c1C)C)COe3ccc4c(OC(=O)C=5CCCC45)c3C                                        | 6.0 | 6.8 | 6.40 |
| 705 | ZINC03999825        | OCCCN1C(=O)c2cccc2N=C1/C=C/c3c4cccc4n(c3)C                                                | 5.9 | 6.9 | 6.40 |

|     |                     |                                                                                                             |     |     |      |
|-----|---------------------|-------------------------------------------------------------------------------------------------------------|-----|-----|------|
| 706 | MolPort-000-797-746 | <chem>OC1(C=C(C[C@]([C@@H]1C(=O)c2ccc(OC)cc2)(c3ccc(OC)cc3)C)c4ccc(OC)cc4)c5ccc(OC)cc5</chem>               | 5.9 | 6.9 | 6.40 |
| 707 | ZINC72325705        | <chem>O=C(NC1c1c(nm(c1C)C)C)CCC=2C(Oc3c(c4c(cc3C2C)c(c(o4)C)C)C)=O</chem>                                   | 6.5 | 6.2 | 6.35 |
| 708 | ZINC02345008        | <chem>Clc1cccc(COc2ccc3C(=O)C(c4ccc(Cl)cc4)=COc3c2)c1</chem>                                                | 6.5 | 6.2 | 6.35 |
| 709 | SN00372645          | <chem>O=C(O[C@@H](Cc1cocc-2c(ccc21)C=O)/C=C(/CCC=C(C)C)C)C</chem>                                           | 6.3 | 6.4 | 6.35 |
| 710 | ZINC06624183        | <chem>O=C(N[C@@H]([C@H](CC)C)C([O-])=O)CC=1C(Oc2cc(c3c(C)ccc3c2C1C)C)=O</chem>                              | 6.3 | 6.4 | 6.35 |
| 711 | SN00102958          | <chem>O=C1C[C@H](c2c(N1)c(en2-c3c(OC)ccc(OC)c3)C([O-])=O)c4ccc(OC)c(O)c4</chem>                             | 6.3 | 6.4 | 6.35 |
| 712 | MolPort-001-737-182 | <chem>Clc1ccc(C(=O)Nc2cc(OC)c(OC)cc2Cc3c4cc(OC)c(OC)cc4ccn3)cc1Cl</chem>                                    | 6.2 | 6.5 | 6.35 |
| 713 | 169181-25-3         | <chem>O=C(N([C@@H](C(C)C)/C=C(\C)C(O)=O)C)[C@H](NC(=O)[C@H](NC)C(c1c[nH]c2ccccc21)(C)C)C(C)C</chem>         | 6.2 | 6.5 | 6.35 |
| 714 | SN00295762          | <chem>O=C1C=C(Oc2e1ccc3c2cc3)c4c(OC)ccc(OC)c4</chem>                                                        | 6.2 | 6.5 | 6.35 |
| 715 | SN00379562          | <chem>O=C1C=C[C@]2([C@@H](C(CC[C@H]2C1(C)C)=C)COc3c(OC)cc4C=CC(Oc4c3OC)=O)C</chem>                          | 6.2 | 6.5 | 6.35 |
| 716 | ZINC20611253        | <chem>O=C(N[C@@H]([C@H](CC)C)C([O-])=O)[C@@H](N1C(=O)Nc2ccccc2C1=O)CC(C)C</chem>                            | 6.0 | 6.7 | 6.35 |
| 717 | SN00282943          | <chem>O=C1C(Nc2nc([C@@H](OC)c3ccc(OC)cc3)c(n2C)C4ccc(OC)cc4)=NC(=O)N1C</chem>                               | 6.4 | 6.2 | 6.30 |
| 718 | ZINC12896984        | <chem>O=C(Nc1ccc2c(c1)C=CC(O2)=O)CC=3C(Oc4cc(cc(OCC(C)=C)c4C3C)C)=O</chem>                                  | 6.2 | 6.4 | 6.30 |
| 719 | ZINC38139997        | <chem>O=C(N1[C@H](CCC1)C([O-])=O)[C@H](NC(=O)[C@H](N2C(=O)Nc3ccccc3C2=O)Cc4cccc4)[C@H](CC)C</chem>          | 6.2 | 6.4 | 6.30 |
| 720 | SN00083504          | <chem>O=C1C(=O)[C@@H-]([C@@H](N1CCOC)c2cc(OC)c(OC)c(OC)c2)C(=O)c3ccc(o3)C</chem>                            | 6.2 | 6.4 | 6.30 |
| 721 | ZINC02145888        | <chem>O=C1C2=C(OC([NH3+])=C([C@@H]2c3cc(OC)c4c(OCO4)c3)C#N)C=C(N1CCc5ccc(OC)c(OC)c5)C</chem>                | 6.2 | 6.4 | 6.30 |
| 722 | MolPort-009-649-148 | <chem>O=C1C[C@H](c2c(N1)c(en2-c3cc(OC)ccc3OC)C(O)=O)c4ccc(OC)cc4</chem>                                     | 6.2 | 6.4 | 6.30 |
| 723 | SN00138838          | <chem>FC(F)(F)C(C(=O)Nc1cc(ccc1OC)C(F)(F)F)C(F)(F)F</chem>                                                  | 6.2 | 6.4 | 6.30 |
| 724 | ZINC68575413        | <chem>FC(F)(O[C@](F)(C(=O)N=C\1C=CC=C(N1)C)C(F)(F)F)[C@](F)(OC(F)(F)C(F)(F)F)C(F)(F)F)C(F)(F)F</chem>       | 6.2 | 6.4 | 6.30 |
| 725 | ZINC04273464        | <chem>S=C(NCC=C)N/N=C(/C=1C(=O)c2ccccc2N(CC)C1[O-])C</chem>                                                 | 6.2 | 6.4 | 6.30 |
| 726 | ZINC02151831        | <chem>O=S(=O)(N[C@@H](CCCC)C(Oc1ccc2C(c3ccc(OC)cc3)=CC(Oc2c1C)=O)=O)c4ccc(cc4)C</chem>                      | 5.9 | 6.7 | 6.30 |
| 727 | ZINC11865226        | <chem>Clc1c(Cl)cc(COc2ccc3C(=O)C(c4ccc(OC)cc4)=COc3c2)cc1</chem>                                            | 6.5 | 6.1 | 6.30 |
| 728 | SN00061024          | <chem>O=C1C2=C(OC(N)=C([C@H]2c3cc(OC)c(OC)c(OC)c3)C#N)C=C(N1Cc4ccc(OC)c(OC)c4)C</chem>                      | 6.3 | 6.3 | 6.30 |
| 729 | MolPort-028-855-479 | <chem>O=C(NCCCCOC)Cn1c2ccccc2c3CCN4C(=O)c5ccccc5N=C4c31</chem>                                              | 6.3 | 6.3 | 6.30 |
| 730 | ZINC06075844        | <chem>Clc1c(Cl)ccc(CNC(=O)c2cc3c4ccccc4[nH]c3e(n2)C)c1</chem>                                               | 6.3 | 6.3 | 6.30 |
| 731 | ZINC20466733        | <chem>Fe1cccc(C(=O)N[C@H]2CC[C@@]3(CC[C@@H]([C@@H](O)[C@@H]3[C@H]2C)[C@H](C(=O)N4CCCC4)C)C)c1</chem>        | 6.3 | 6.3 | 6.30 |
| 732 | 23230               | <chem>Fe1cc(F)cc(CNC(=O)C[C@@H]2[C@@H](O)CC[C@@H]3[C@@]4(CO[C@H](O[C@@H]4CC[C@@]23)CNS(=O)(=O)C)C)c1</chem> | 6.1 | 6.5 | 6.30 |
| 733 | ZINC71386405        | <chem>Clc1cccc1COc2ccc(-c3c(-c4ccc(OC)c(OC)c4)c(nc(n3)N)C(F)(F)F)c(O)c2</chem>                              | 6.1 | 6.5 | 6.30 |
| 734 | ZINC48057069        | <chem>Oc1cccc(OC)c1C(=O)/C=C/c2cccc(OC)c2</chem>                                                            | 6.1 | 6.5 | 6.30 |
| 735 | SN00258775          | <chem>O=C1C=Cc2ccc(OC)c(C[C@H]3C(O[C@@H](O3)C(Cc4c(OC)ccc5C=CC(Oc54)=O)(C)C)C)c2O1</chem>                   | 6.1 | 6.5 | 6.30 |
| 736 | ZINC02092390        | <chem>O=C(c1c2cc(OC)ccc2n(c1C)C)COc3cc(cc4c3C(C)=CC(O4)=O)C</chem>                                          | 6.1 | 6.5 | 6.30 |
| 737 | MolPort-009-649-144 | <chem>O=C1C[C@H](c2c(N1)c(en2-c3ccc(OC)cc3OC)C(O)=O)c4ccc(OC)c(OC)c4</chem>                                 | 6.0 | 6.6 | 6.30 |
| 738 | SN00073804          | <chem>O=C1c2ccccc2OC(/N=C(\O)c3ccccc3)=C1c4cccc(OC)c4</chem>                                                | 6.0 | 6.6 | 6.30 |
| 739 | SN00083510          | <chem>O=C1C2=C(N(C(=O)N1C)C)NC=3c4ccccc4C(=O)C3[C@H]2c5cc(OC)c(OC)c(OC)c5</chem>                            | 6.0 | 6.6 | 6.30 |
| 740 | ZINC02114015        | <chem>O=C(N[C@@H]([C@H](CC)C)C([O-])=O)CC=1C(Oc2c(OC)c(OC)ccc2C1C)=O</chem>                                 | 5.8 | 6.8 | 6.30 |
| 741 | ZINC11865162        | <chem>O=C(Oc1cc(OC)ccc1-c2c(-c3ccc(OC)cc3)c(n2)C)c4ccco4</chem>                                             | 6.4 | 6.1 | 6.25 |
| 742 | MolPort-002-525-974 | <chem>Clc1cc(Cl)ccc1CCN2COc3c(c4c(C(=C(C(O4)=O)C)C)cc3C2)C</chem>                                           | 6.2 | 6.3 | 6.25 |
| 743 | ZINC02096348        | <chem>O=C(c1c2cc(OC)ccc2n(c1C)C)COc3cc(cc4c3C(C)=CC(O4)=O)C</chem>                                          | 6.2 | 6.3 | 6.25 |
| 744 | MolPort-005-950-564 | <chem>Fe1ccc(S(=O)(=O)N2Cc3c(nen3Cc4ccc(OC)cc4)[C@H]2C(OC)=O)cc1</chem>                                     | 6.2 | 6.3 | 6.25 |
| 745 | ZINC79189935        | <chem>O=C1C(=C(c2c(OC(=O)N[C@@H]3CCC[NH+]4CCCC[C@H]34)cc5c(CCC(O5)(C)C)c2O1)C)Cc6ccccc6</chem>              | 6.2 | 6.3 | 6.25 |
| 746 | MolPort-001-745-897 | <chem>Fe1ccc(-c2cc(n(n2)C)[C@H]3CN4CC[C@@H]3[C@H]4CNS(=O)(=O)c5c(OC)ccc(OC)c5)cc1</chem>                    | 6.1 | 6.4 | 6.25 |
| 747 | ZINC17198153        | <chem>S=C1NC(O)=C([C@@H]2c3c(CCN2)c4ccccc4[nH]3)C(=O)N1CCCCC</chem>                                         | 6.1 | 6.4 | 6.25 |
| 748 | MolPort-039-195-378 | <chem>Clc1ccc(C(=O)c2ccc3c([C@@H](c4ccccc(OC)c4OC)CC(O3)=O)c2O)cc1</chem>                                   | 6.1 | 6.4 | 6.25 |
| 749 | ZINC20467354        | <chem>Fe1cccc(NC(=O)N[C@H]2CC[C@@]3(CC[C@@H]([C@@H](O)[C@@H]3[C@H]2C)[C@H](C(=O)N4CCCC4)C)C)c1</chem>       | 6.1 | 6.4 | 6.25 |

|     |                     |                                                                                                         |     |     |      |
|-----|---------------------|---------------------------------------------------------------------------------------------------------|-----|-----|------|
| 750 | SN00053349          | O=C1c2c(OC)c(OC)ccc2[C@H]3N(c4cc(cc(e4)C)C(=O)c5ccccc5N13                                               | 6.1 | 6.4 | 6.25 |
| 751 | ZINC49543301        | O=C1C[C@H](c2c(N1)c(en2-e3ccc(OC)cc3OC)C([O-])=O)c4cccc(OC)c4                                           | 6.0 | 6.5 | 6.25 |
| 752 | ZINC02095669        | O=S(=O)(N[C@H]([C@@H](CC)C)C)Oc1ccc2C(c3ccc(OC)cc3)=CC(Oc2c1C)=O)c4ccc(cc4)C                            | 6.0 | 6.5 | 6.25 |
| 753 | 143682-18-2         | Oc1cccc2c1n3c4c2c5CNC(=O)c5c6c7cc(O)ccc7n([C@@H]8C[C@@H](NC)[C@H](OC)[C@]3(O8)C)c64                     | 6.0 | 6.5 | 6.25 |
| 754 | 129623-30-9         | O=C1c2c(c3c4cccc4n5c3c6c2c7cccc7n6[C@@H]8C[C@H](N(C)C)[C@@H](OC)[C@]5(O8)C)CN1                          | 6.0 | 6.5 | 6.25 |
| 755 | MolPort-007-564-138 | O=C(NCCc1c[nH]c2ccccc21)/C(NC(=O)c3cccc(c3)C)=C/c4ccc(OC)cc4                                            | 6.0 | 6.5 | 6.25 |
| 756 | ZINC04046667        | Clc1cccc(COc2ccc3c(OC(=O)C(=C3C)CCC([O-])=O)c2)c1                                                       | 6.0 | 6.5 | 6.25 |
| 757 | ZINC72324754        | O=C(Nc1cccc2c1cn2C)CCn3ccc4c(OC)cccc43                                                                  | 6.0 | 6.5 | 6.25 |
| 758 | MolPort-005-910-869 | O=C(NCCc1ccc(OC)c(OC)c1)c2ccccc2CC3=Cc4cccc4C(O3)=O                                                     | 5.9 | 6.6 | 6.25 |
| 759 | MolPort-008-348-717 | O=C1C[C@H](c2c(N1)c(en2-e3ccc(OC)cc3)C(O)=O)c4cc(OC)c(O)c(OC)c4                                         | 5.9 | 6.6 | 6.25 |
| 760 | SN00077983          | O=C1[C@@H-]([C@@H](N(CCOC)C1=O)c2ccc(OC)c(OC)c2)C(=O)c3ccco3                                            | 5.9 | 6.6 | 6.25 |
| 761 | ZINC04062053        | O=C(NCCCCC([O-])=O)COc1ccc2c(OC(=O)C=C2CCCC)c1C                                                         | 5.9 | 6.6 | 6.25 |
| 762 | MolPort-000-813-035 | O=C(N[C@H](Cc1c[nH]c2ccc(O)cc21)C(O)=O)COc3ccc4c(OC(=O)C(=C4C)C)c3                                      | 5.8 | 6.7 | 6.25 |
| 763 | ZINC11865225        | Clc1c(Cl)ccc(COc2ccc3C(=O)C(c4ccc(OC)c(OC)c4)=COc3c2)c1                                                 | 6.4 | 6.0 | 6.20 |
| 764 | MolPort-039-194-841 | O=C(NCc1cccc1OC)C[C@@H](c2ccc(OC)c(OC)c2OC)C=3C(OC(=CC3O)C)=O                                           | 6.2 | 6.2 | 6.20 |
| 765 | MolPort-044-810-910 | O=C(NCCc1c[nH]cn1)Cc2c(oc3C(=O)C=C(Oc32)C)-c4ccc(OC)cc4                                                 | 6.2 | 6.2 | 6.20 |
| 766 | SN00161478          | O=C1C=C2C=3C(Oc4cc(OC)c5C=C[C@H](Oe5c4C3C=C(O2)e6ccccc6)c7ccccc7)=C1C                                   | 6.2 | 6.2 | 6.20 |
| 767 | ZINC08918194        | Clc1cccc(COc2ccc3C(=C(CC(=O)N4CC[C@@]5(O)CCCC[C@@H]5C4)C(Oc3c2C)=O)C)c1                                 | 6.2 | 6.2 | 6.20 |
| 768 | ZINC05817910        | Oc1cc(OC)ccc1-c2c(-c3ccc(OC)c(OC)c3)c[nH]n2                                                             | 6.0 | 6.4 | 6.20 |
| 769 | ZINC12899640        | O=C(Nc1ccc(OC)c(OC)c1)CC=2C(Oc3c(C2C)c(OC)cc4c3CCC(O4)(C)C)=O                                           | 6.0 | 6.4 | 6.20 |
| 770 | ZINC38549848        | O=C1C=C2C3=C[C@@]([C@]([C@@]3)CC[C@@]2([C@]4(CC[C@H]5C([C@@H](OCO)CC[C@@]5([C@H]14)C)(C)C)C)C)C([O-])=O | 6.0 | 6.4 | 6.20 |
| 771 | ZINC02119925        | Clc1cccc([C@H]2c3c(C[C@H]4C(=O)N(CCCOC)CC(=O)N42)c5ccccc5[nH]3)c1                                       | 6.0 | 6.4 | 6.20 |
| 772 | MolPort-009-649-155 | O=C1C[C@@H](c2c(N1)c(en2-e3ccc(OC)cc3OC)C(O)=O)c4ccc(OC)cc4OC                                           | 6.0 | 6.4 | 6.20 |
| 773 | MolPort-002-524-289 | O=C(NCc1cnccc1)c2cc3c4cccc4[nH]c3c(n2)-e5cc(OC)c(OC)c(OC)c5                                             | 6.0 | 6.4 | 6.20 |
| 774 | ZINC49543327        | O=C1C[C@H](c2c(N1)c(en2-e3cc(OC)ccc3OC)C([O-])=O)c4ccc(OC)cc4                                           | 5.7 | 6.7 | 6.20 |
| 775 | 155233-31-1         | O=C([C@@H](NC(=O)C[C@H](NC(=O)C=C(C)C)C1cccc1)C(C)C)[C@H]2C(=O)NC(=O)[C@H]2C                            | 6.3 | 6.1 | 6.20 |
| 776 | 181423-71-2         | O=C1c2c(c3-c4cc(OC)c(OC)cc4CCn23)-e5ccc(OC)c(OC)c5)-c6cc(OC)c(OC)cc6O1                                  | 6.3 | 6.1 | 6.20 |
| 777 | ZINC04046180        | Fe1cccc(COc2ccc3c(OC(=O)C(=C3C)CC([O-])=O)c2)c1                                                         | 6.1 | 6.3 | 6.20 |
| 778 | MolPort-028-856-366 | Oc1ccc2c(oc3c2nc4c(c3-e5ccc(OC)cc5)cnn4C(C)C)c1C                                                        | 6.1 | 6.3 | 6.20 |
| 779 | MolPort-007-902-409 | O=C(NCc1cccc1OC)c2ccc3c(nc(c(n3)-c4cc(OC)c(OC)c(OC)c4)-c5cc(OC)c(OC)c(OC)c5)c2                          | 6.1 | 6.3 | 6.20 |
| 780 | ZINC02120633        | O=C(N[C@H]([C@@H](CC)C)C([O-])=O)CC=1C(Oe2cc3c(c(C(C)C)C)co3)cc2C1C)=O                                  | 5.8 | 6.6 | 6.20 |
| 781 | 12190               | Fe1cccc1C[NH+](C[C@H]2C=C([C@@H](C[C@H]2C(C)C)C)C)C)C)C)C)C)C)Cc5cccc5F                                 | 6.3 | 6.0 | 6.15 |
| 782 | 99457-91-7          | O[C@@H]1C(=O)C(=C(O)C(=O)[C@@H]([C@@H]2C=C(CC[C@@H]1C(C)=C)C(O2)=O)C(C)=C)C                             | 6.2 | 6.1 | 6.15 |
| 783 | ZINC04089321        | O=C(NCCCCOC(C)C)CC=1C(Oc2c(c3c(e4c(o3)CCCC4)cc2C1C)C)=O                                                 | 6.1 | 6.2 | 6.15 |
| 784 | ZINC02149278        | Clc1c(Cl)ccc(COc2ccc3C(=C(CC(OC)=O)C(Oc3c2C)=O)C)c1                                                     | 6.1 | 6.2 | 6.15 |
| 785 | ZINC30881458        | Fe1cccc(C(=O)NC[C@@H]2C=C([C@@H](C[C@H]2C(C)C)CC(=O)NCC#C)C)c1                                          | 6.0 | 6.3 | 6.15 |
| 786 | MolPort-019-936-025 | Fe1ccc(-c2cc(no2)CC3(NC)C4ccc(OC)cc4O)COC3)cc1                                                          | 5.9 | 6.4 | 6.15 |
| 787 | ZINC02104075        | O=C(N[C@@H]([C@@H](CC)C)C([O-])=O)CC=1C(Oe2cc3c(c4c(o3)CCCC4)cc2C1C)=O                                  | 5.8 | 6.5 | 6.15 |
| 788 | MolPort-002-533-189 | O=C1c2ccccc2OC(NC(=O)c3ccco3)=C1c4ccc(OC)c(OC)c4                                                        | 5.7 | 6.6 | 6.15 |
| 789 | ZINC02092427        | Clc1c(Cl)ccc(COc2ccc3C(=C(CC([O-])=O)C(Oc3c2C)=O)C)c1                                                   | 5.7 | 6.6 | 6.15 |
| 790 | MolPort-028-854-697 | O=C1C=C(c2cc3c(CNC)C4ccc(OC)c(OC)c4)en(c3o2)C5ccc(c(c5O1)C)C                                            | 6.2 | 6.0 | 6.10 |
| 791 | ZINC19927379        | OC1=C(C(=O)c2cccc3e2N1CCC3)C(=O)NCCCN(C)C                                                               | 6.1 | 6.1 | 6.10 |
| 792 | SN00060965          | O=C1C2=C(OC(N)=C([C@@H]2c3ccc(OC)c(OC)c3OC)C#N)C=C(N1Cc4ccc(OC)c(OC)c4)C                                | 6.1 | 6.1 | 6.10 |
| 793 | SN00062839          | O=C1C2=C([C@H](N1CCc3ccc(OC)cc3)c4ccc(O)c(OC)c4)C(=O)c5ccccc5O2                                         | 6.0 | 6.2 | 6.10 |

|     |                     |                                                                                            |     |     |      |
|-----|---------------------|--------------------------------------------------------------------------------------------|-----|-----|------|
| 794 | ZINC12875599        | Clc1cccc(F)c1CNC(=O)[C@H](N2C(=O)N3CCc4c5cccc5[nH]c4[C@]3(C2=O)C)CC(C)C                    | 6.0 | 6.2 | 6.10 |
| 795 | MolPort-028-856-471 | O=C(NCCCN(C)C)Cn1c2cccc2c3CCN4C(=O)c5cccc5N=C4c31                                          | 6.0 | 6.2 | 6.10 |
| 796 | ZINC08791756        | O=C(N[C@H]([C@H](CC)C)C(=O)NCc1cccc(OC)c1)[C@H]2C(S[C@@H]3c4cccc4C(=O)N32)(C)C             | 6.0 | 6.2 | 6.10 |
| 797 | MolPort-009-649-145 | O=C1C[C@H](c2c(N1)c(en2-c3ccc(OC)cc3OC)C(O)=O)c4cccc(OC)c4OC                               | 5.9 | 6.3 | 6.10 |
| 798 | SN00073864          | O=C1c2cccc2OC(/N=C(\O)c3cccc(OC)c3)=C1c4cccc(OC)c4                                         | 5.9 | 6.3 | 6.10 |
| 799 | MolPort-002-087-773 | Oc1cc(OC)ccc1-c2c(-c3ccc(OC)cc3)c([nH]n2)C                                                 | 5.9 | 6.3 | 6.10 |
| 800 | ZINC03846616        | O=C(C[C@H](Nc1cccc(N)c1)c2ccc(N(C)C)cc2)C=3C(=O)c4cccc4N(C3[O-])C                          | 5.8 | 6.4 | 6.10 |
| 801 | MolPort-035-873-330 | O=C1C([C@H](c2cccc2OCc3ccc(OC)cc3)CC(OC)=O)=C(O)C=C(N1CCc4ccc(O)cc4)C                      | 5.8 | 6.4 | 6.10 |
| 802 | MolPort-009-649-145 | O=C1C[C@H](c2c(N1)c(en2-c3ccc(OC)cc3OC)C(O)=O)c4cccc(OC)c4OC                               | 5.8 | 6.4 | 6.10 |
| 803 | MolPort-035-702-025 | O=C(N1CCN(CC1)C)C[C@H](c2c(O)c(O)c(O)c3C(=O)C=C(Oc32)c4cccc4)c5cc(OC)c(OC)c(OC)c5          | 5.7 | 6.5 | 6.10 |
| 804 | MolPort-005-950-438 | O=C(NCc1ccc(OC)cc1)[C@H]2Cc3c(nc[nH]3)CN2Cc4cc5cccc5o4                                     | 5.7 | 6.5 | 6.10 |
| 805 | MolPort-002-533-108 | O=C1c2cccc2OC(NC(=O)c3cccc3)=C1c4cccc(OC)c4                                                | 5.6 | 6.6 | 6.10 |
| 806 | MolPort-002-529-261 | OC(=O)[C@@H](NC(=O)CCC=1C(Oc2cc3c(c(o3)C)C)cc2C1C)=O)Cc4c[nH]c5ccc(O)cc54                  | 5.6 | 6.6 | 6.10 |
| 807 | ZINC02148665        | Fe1cccc(COc2ccc3c(OC(=O)C(=C3C)CC([O-])=O)c2C)c1                                           | 5.5 | 6.7 | 6.10 |
| 808 | ZINC30881020        | Fe1cccc(C(=O)NC[C@@H]2C=C([C@@H]([C@H]2C(C)C)CC(=O)N3CCOCC3)C)c1                           | 6.2 | 5.9 | 6.05 |
| 809 | ZINC02095349        | O=C(c1c2cccc2n(c1C)C)COc3ccc4C(c5ccc(OC)cc5)=CC(Oc4c3C)=O                                  | 5.9 | 6.2 | 6.05 |
| 810 | MolPort-000-814-627 | O=C(NCCc1ccc(OC)c(OC)c1)COc2ccc(cc3c2C(=C(C)C(O3)=O)C)C                                    | 5.9 | 6.2 | 6.05 |
| 811 | MolPort-039-057-703 | Oc1ccc2c(oc3c2nc4c(c3-c5ccc(OC)c(O)c5)enn4C)c1C                                            | 5.9 | 6.2 | 6.05 |
| 812 | MolPort-008-348-717 | O=C1C[C@H](c2c(N1)c(en2-c3ccc(OC)cc3)C(O)=O)c4ccc(OC)c(O)c(OC)c4                           | 5.7 | 6.4 | 6.05 |
| 813 | MolPort-000-792-600 | O=C(N[C@H](C(=O)N[C@@H](Cc1c[nH]c2cccc21)C(O)=O)C)CCC=3C(Oc4cc5c(c(c(o5)C)C)cc4C3C)=O      | 5.7 | 6.4 | 6.05 |
| 814 | ZINC04023594        | O=C(OCC1([C@@H](C=C(C[C@H]1C)C)C)COC(=O)CCCC)CCCC                                          | 6.1 | 6.0 | 6.05 |
| 815 | MolPort-002-518-223 | O=S(=O)(N[C@H](CC)C(Oc1ccc2-c3ccc(OC)cc3C(Oc2c1C)=O)=O)c4ccc(cc4)C                         | 6.0 | 6.1 | 6.05 |
| 816 | MolPort-002-523-304 | Clc1cccc(CNC(=O)[C@@H](N2C(=O)N3CCc4c5cccc5[nH]c4[C@]3(C2=O)C)C)c1                         | 6.0 | 6.1 | 6.05 |
| 817 | SN00243902          | O=C(O[C@H]1CC[C@]2([C@H](C(CC[C@H]2C1(C)C)=C)COc3c(OC)cc4C=CC(Oc4c3OC)=O)C)C               | 6.0 | 6.1 | 6.05 |
| 818 | 149378-57-4         | O=C1c2c(c(c3-c4cc(OC)c(O)cc4CCn23)-c5ccc(OC)c(O)c5)-c6ccc(OC)c(O)cc6O1                     | 6.0 | 6.1 | 6.05 |
| 819 | ZINC35466060        | O=C1C2=C([C@@H](OC)[C@H](OC(=O)/C=C/C=C(C)C)[C@@H]3C(CCC[C@]23C)(C)C)CN1[C@@H](C)C([O-])=O | 5.8 | 6.3 | 6.05 |
| 820 | 9574                | Clc1ccc(-c2noc(n2)[C@@H]3Cc4c(nc[nH]4)CN3C(=O)c5ccc(F)cc5)cc1                              | 5.8 | 6.3 | 6.05 |
| 821 | ZINC02125058        | O=C(NCC(=O)N[C@H]([C@@H](CC)C)C([O-])=O)CCC=1C(Oc2c(C1C)cc3c(oc3C(C)C)C)c2C)=O             | 6.1 | 5.9 | 6.00 |
| 822 | ZINC38143767        | O[C@@H]1C[C@@]2([C@@]([C@H]1)[C@@]1(O)(C(=O)CCC(O)(C)C)C)C(C)C(C)C(C)C                     | 6.1 | 5.9 | 6.00 |
| 823 | MolPort-002-518-797 | Fe1cccc1NC(=O)CCC=2C(Oc3cc4c(c(c(o4)C)C)cc3C2C)=O                                          | 5.9 | 6.1 | 6.00 |
| 824 | ZINC12899873        | O=C1c2c(OC)c(OC)ccc2[C@@H]3N1[C@H](C(S3)(C)C)C(=O)Nc4cccc5c(c4)C=CC(O5)=O                  | 5.9 | 6.1 | 6.00 |
| 825 | SN00344408          | O[C@H]1c2cc(OC)c(OC)c(OC)c2-c3c(OC(=O)[C@H](CC)C)c(OC)c(OC)cc3C[C@H]([C@@H]1C)C            | 5.9 | 6.1 | 6.00 |
| 826 | ZINC06167362        | Clc1cc(Cl)ccc1CNC(=O)c2cc3c4cccc4[nH]c3c(n2)C                                              | 5.8 | 6.2 | 6.00 |
| 827 | SN00335313          | O=C1C=C[C@]2([C@H](C(=CC[C@H]2C1(C)C)C)COc3c(OC)cc4C=CC(Oc4c3OC)=O)C                       | 5.7 | 6.3 | 6.00 |
| 828 | 152273-84-2         | Oc1c(OC)c(OC)c(O)c(Cc2c(nc(n2)NC=3C(=O)N(C)C(=O)N3)Cc4ccc(OC)cc4)c1                        | 5.7 | 6.3 | 6.00 |
| 829 | ZINC02123590        | O=C(NCCCCC([O-])=O)CC=1C(Oc2cc(OC)cc(OC)c2C1C)=O                                           | 5.5 | 6.5 | 6.00 |
| 830 | MolPort-002-518-554 | Fe1cc(F)ccc1NC(=O)CCC=2C(Oc3cc4c(c(c(o4)C)C)cc3C2C)=O                                      | 5.9 | 6.0 | 5.95 |
| 831 | MolPort-038-386-405 | Clc1ccc(-c2c(c(on2)[C@H](O)C)C(=O)NCCOC)cc1                                                | 5.9 | 6.0 | 5.95 |
| 832 | ZINC02095346        | O=S(=O)(N[C@H](CCCC)C(Oc1ccc2c(OC(=O)C=C2CCCC)c1)=O)c3ccc(cc3)C                            | 5.9 | 6.0 | 5.95 |
| 833 | ZINC02667597        | Clc1c(Cl)ccc1COc2ccc3c(OC=C(c4cccc4OC)C3=O)c2cc1                                           | 5.9 | 6.0 | 5.95 |
| 834 | ZINC17146927        | O=C(C1=C([O-])C(=O)N([C@H]1c2cc(OC)c(OC)c(OC)c2)CCOC)c3ccc(OC)c(c3)C                       | 5.7 | 6.2 | 5.95 |
| 835 | ZINC02157897        | O=C(NCCCCC([O-])=O)CC=1C(Oc2c(c3c(cc2C1C)c(c(o3)C)C)C)=O                                   | 5.5 | 6.4 | 5.95 |

|     |                     |                                                                                                                     |     |     |      |
|-----|---------------------|---------------------------------------------------------------------------------------------------------------------|-----|-----|------|
| 836 | MolPort-039-194-689 | O=C1C[C@@H](c2cc(OC)c(OC)c(OC)c2)c3c(O1)ccc4C(=O)C(c5ccc(OC)c(OC)c5)=COc43                                          | 5.5 | 6.4 | 5.95 |
| 837 | ZINC08790722        | Clc1cccc(COc2ccc3C=C(C4=CC(Oc5c(OC)c(OC)ccc45)=O)C(Oc3c2)=O)c1                                                      | 5.5 | 6.4 | 5.95 |
| 838 | ZINC02117069        | O=C1C=2CCCC2c3cc4c(OCN(C4)c5c(C)ccc(c5)C)c(c3O1)C                                                                   | 5.8 | 6.1 | 5.95 |
| 839 | ZINC02125535        | O=C1c2ccccc2-c3cc4c(OCN(C4)c5cccc(c5)C)c(c3O1)C                                                                     | 5.8 | 6.1 | 5.95 |
| 840 | ZINC79192837        | O=C1c2ccccc2C(C(=O)NC[C@H]3CCCC[NH+]4CCCC[C@H]34)=CN1Cc5ccccc5                                                      | 5.8 | 6.1 | 5.95 |
| 841 | MolPort-009-649-144 | O=C1C[C@H](c2c(N1)c(en2-c3ccc(OC)cc3OC)C(O)=O)c4ccc(OC)c(OC)c4                                                      | 5.6 | 6.3 | 5.95 |
| 842 | SN00051121          | N/C(=[NH+])c1cc2cc(OC)c(OC)cc2e(n1)Cc3ccc(OC)c(OC)c3)Cc4ccc(OC)c(OC)c4                                              | 6.0 | 5.8 | 5.90 |
| 843 | ZINC31168056        | O[C@H](C(O)(C)C)[C@H](O)C/C(=C/CC/C(=C\COc1ccc2C=CC(Oc2c1)=O)C)C                                                    | 5.8 | 6.0 | 5.90 |
| 844 | MolPort-039-194-968 | OC=1C(=O)C=C(OC1[C@H](c2ccc(SC)cc2)CC(OC)=O)CN3Cc4cc(OC)c(OC)cc4CC3                                                 | 5.7 | 6.1 | 5.90 |
| 845 | ZINC12296372        | O=C1c2c(cc3c(c2O[C@H](c4cccc(OC)c4OC)C1)C(=C(C(O3)=O)C)C)C                                                          | 5.7 | 6.1 | 5.90 |
| 846 | ZINC02123120        | O=C(N[C@@H](CCCC)C([O-])=O)CC=1C(Oc2cc3c(c(-c4cccc4)c(o3)C)cc2C1C)=O                                                | 5.7 | 6.1 | 5.90 |
| 847 | ZINC68589300        | ClCCCC(=O)Nc1c2c(nc3CCCCc31)CCCC2                                                                                   | 5.6 | 6.2 | 5.90 |
| 848 | SN00102579          | O=C1C[C@@H](c2c(N1)c(en2-c3ccc(OC)cc3)C([O-])=O)c4cccc(OC)c4OC                                                      | 5.5 | 6.3 | 5.90 |
| 849 | SN00305462          | O[C@H]1c2c3c(OC)cc(OC)cc3O[C@@]([C@@H]1[C@@H])([C@@H]2C(=O)N4CCC[C@H]4NC(=O)C(C)=CC)c5ccccc5)([C@@H]1O)c6ccc(OC)cc6 | 5.4 | 6.4 | 5.90 |
| 850 | MolPort-007-733-445 | O=C1c2ccccc2C(=CN1c3cccc(OC)c3)C(=O)NCCc4ccc(OCC)cc4                                                                | 5.9 | 5.8 | 5.85 |
| 851 | 17917               | O=S(=O)(c1ccc(-c2c[nH]c(n2)[C@@H]3COCC[NH+]3Cc4ccc(OC)cc4)cc1)C                                                     | 5.8 | 5.9 | 5.85 |
| 852 | MolPort-001-999-765 | O=C1N(C(=O)c2c(N1C)nc(Oc3cc(cc3)C)C)n2Cc4ccc(OC)cc4)C                                                               | 5.8 | 5.9 | 5.85 |
| 853 | SN00103065          | O=C1C[C@H](c2c(N1)c(en2-c3ccc(OC)cc3OC)C([O-])=O)c4ccc(OC)c(OC)c4                                                   | 5.7 | 6.0 | 5.85 |
| 854 | ZINC38143767        | O[C@H]1C[C@@]2([C@@]([C@H]1[C@@H])(O)(C(=O)CCC(O)C)C)C(CC(=O)[C@]3([C@H]4C[C@H](O)C(=O)C(C4=CC[C@H]32)(C)C)C)C      | 5.7 | 6.0 | 5.85 |
| 855 | SN00254960          | O=C1c2c(c3-c4cc(OC)c(OC)cc4CCn23)-c5ccc(OC)c(OC)c5)-c6cc(OC)c(O)cc6O1                                               | 5.7 | 6.0 | 5.85 |
| 856 | SN00103017          | O=C1C[C@H](c2c(N1)c(en2-c3ccc(OC)cc3OC)C([O-])=O)c4ccc(O)c(OC)c4                                                    | 5.6 | 6.1 | 5.85 |
| 857 | MolPort-044-810-666 | O=C(N[C@H](CCSC)c1nnc2cccn21)Cc3c(oc4C(=O)C=C(Oc43)C)-c5ccc(OC)cc5                                                  | 5.5 | 6.2 | 5.85 |
| 858 | MolPort-042-674-422 | Fe1cc(F)ccc1-c2ccc3c(O[C@H]4CN(C[C@H]4N(C3=O)C)CCCc5ccccc5)e2                                                       | 5.9 | 5.7 | 5.80 |
| 859 | MolPort-007-787-617 | O=C(NC1ccc(OC)cc1OC)c2c(nnc3ccccc32)-c4ccccc4                                                                       | 5.7 | 5.9 | 5.80 |
| 860 | ZINC30883812        | O[C@@H]1[C@H](CC[C@]2(CC[C@H](NC(=O)COC)[C@@H]([C@@H]12)C)C)[C@H](C(=O)N3CCCC3)C                                    | 5.7 | 5.9 | 5.80 |
| 861 | MolPort-044-544-159 | O=C(NCC(OC)OC)Cc1c(oc2C(=O)C=C(Oc21)C)-c3ccc(OC)cc3                                                                 | 5.4 | 6.2 | 5.80 |
| 862 | MolPort-002-533-223 | O=C1c2ccccc2OC(NC(=O)c3cccc(OC)c3)=C1c4cccc(OC)c4                                                                   | 5.4 | 6.2 | 5.80 |
| 863 | ZINC05783367        | ClCCCCC(=O)Nc1cc(nc2ccccc21)C                                                                                       | 5.6 | 6.0 | 5.80 |
| 864 | MolPort-002-184-761 | O=C1C2=C(N(C(=O)N1C)C)NC=3c4cccc4C(=O)C3[C@H]2c5ccc(O)c(OC)c5                                                       | 5.6 | 6.0 | 5.80 |
| 865 | ZINC02095836        | O=S(=O)(N[C@@H](Cc1c[nH]c2ccccc21)C(Oc3ccc4c(OC(=O)C=C4CC)c3)=O)c5ccc(cc5)C                                         | 5.6 | 6.0 | 5.80 |
| 866 | MolPort-001-683-688 | O=C(OC(C)C)N[C@@H](Cc1c[nH]c2ccccc21)C(Oc3ccc4C(=C(Cc5ccccc5)C(Oc4c3)C)=O)C=O                                       | 5.6 | 6.0 | 5.80 |
| 867 | 200936-84-1         | O[C@@H](CCCCC(=O)C)=C1O[C@]2(C1C(=C3C=C(OC=C3[C@@H]2O)C)C=O)C=O)C                                                   | 5.5 | 6.1 | 5.80 |
| 868 | MolPort-001-906-348 | O=C1C2=C(N(C(=O)N1C)C)NC=3c4cccc4C(=O)C3[C@@H]2c5c(OC)ccc(OC)c5                                                     | 5.5 | 6.1 | 5.80 |
| 869 | ZINC02114872        | O=C(NCCCCC([O-])=O)[C@H](Oc1cc(cc2c1C3=C(CCCC3)C(O2)=O)C)C                                                          | 5.3 | 6.3 | 5.80 |
| 870 | 189083-80-5         | O[C@@H]1Cc2c(OC)c(OC)c(OC)cc2-c3c(c4-c5cc(OC)c(O)cc5OC(=O)c4n13)-c6ccc(OC)c(O)c6                                    | 5.5 | 6.0 | 5.75 |
| 871 | ZINC70687176        | Clc1ccc([C@@H]2[C@H]3CCCCC3(O)CCN2C(=O)COc4cc(cc5c4C(CCCC)=CC(O5)=O)C)cc1                                           | 5.4 | 6.1 | 5.75 |
| 872 | SN00061023          | O=C1C2=C(OC(N)=C([C@@H]2c3cc(OC)c(OC)c(OC)c3)C#N)C=C(N1Cc4ccc(OC)c(OC)c4)C                                          | 5.4 | 6.1 | 5.75 |
| 873 | MolPort-008-348-069 | O=C1C[C@H](c2c(N1)c(en2-c3ccc(OC)cc3)C(O)=O)c4ccc(OC)cc4OC                                                          | 5.5 | 5.9 | 5.70 |
| 874 | 19310               | Fe1ccc(-c2c([C@@H](NC(=O)c3cccn3)C)c(on2)C([O-])=O)cc1                                                              | 5.2 | 6.2 | 5.70 |
| 875 | MolPort-001-728-081 | Fe1ccc(C(=O)N2CCc3cc(OC)c(OC)cc3[C@@H]2Cc4ccc(OC)c(OC)c4)cc1                                                        | 5.6 | 5.8 | 5.70 |
| 876 | MolPort-008-348-079 | O=C1C[C@H](c2c(N1)c(en2-c3ccc(OC)cc3)C(O)=O)c4cc(OC)c(OC)c(OC)c4                                                    | 5.6 | 5.8 | 5.70 |
| 877 | MolPort-044-543-703 | O=C(NC[C@@H](N(C)C)c1ccc1)Cc2c(oc3C(=O)C=C(Oc32)C)-c4ccc(OC)cc4                                                     | 5.3 | 6.1 | 5.70 |
| 878 | MolPort-009-649-107 | O=C1C[C@H](c2c(N1)c(en2-c3ccc(OC)cc3OC)C(O)=O)c4ccc(O)c(OC)c4                                                       | 5.3 | 6.1 | 5.70 |

|     |                     |                                                                                                        |     |     |      |
|-----|---------------------|--------------------------------------------------------------------------------------------------------|-----|-----|------|
| 879 | ZINC70705416        | <chem>O=C(N[C@H](c1cccc1)C([O-])=O)[C@@H](NC(=O)[C@@H](N2C(=O)Nc3cccc3C2=O)Cc4cccc4)[C@@H](CC)C</chem> | 5.3 | 6.1 | 5.70 |
| 880 | MolPort-001-907-854 | <chem>Clc1c(Cl)ccc(Cn2c3C(=O)N(C(=O)N(c3nc2NCCCO)C)C)c1</chem>                                         | 5.3 | 6.1 | 5.70 |
| 881 | ZINC02125325        | <chem>O=C1C(C2=CC(OC3cc(OCc4c(c(c(c4C)C)C)C)ccc32)=O)=Cc5ccccc(OC)c5O1</chem>                          | 5.3 | 6.1 | 5.70 |
| 882 | MolPort-002-277-679 | <chem>Clc1cc(Cl)ccc1Cn2c(nc3c2C(=O)N(C(=O)N3C)C)NCCOC</chem>                                           | 5.5 | 5.8 | 5.65 |
| 883 | ZINC02115373        | <chem>O=C(NCCCCC([O-])=O)CC=1C(Oc2cc3c(c(C(C)C)C)co3)cc2C1C=O</chem>                                   | 5.3 | 6.0 | 5.65 |
| 884 | ZINC04046886        | <chem>O=C1C(CCC([O-])=O)=C(c2ccc(OCc3cccc(OC)c3)c(e2O1)C)C</chem>                                      | 5.2 | 6.1 | 5.65 |
| 885 | ZINC85879780        | <chem>OC=1C(=O)C=C(N(C1C(c2ccc(OC)c(OC)c2OC)C3=C(O)C(=O)C=C(N3C)C)C)C</chem>                           | 5.4 | 5.8 | 5.60 |
| 886 | SN00063749          | <chem>Clc1ccc(C[C@@H](NC(=O)[C@@H](NC(=O)CC=2C(Oc3cc4c(c(c(o4)C)C)cc3C2C)=O)C)C([O-])=O)cc1</chem>     | 4.9 | 6.3 | 5.60 |
| 887 | SN00098390          | <chem>O=C1c2c(OC)c(OC)ccc2[C@H](O1)c3cc(OC)c(OC)cc3Cc4c5ccc(OC)c(OC)cc5ccn4</chem>                     | 5.4 | 5.7 | 5.55 |
| 888 | MolPort-009-649-139 | <chem>O=C1C[C@@H](c2c(N1)c(en2-c3ccc(OC)cc3OC)C(O)=O)c4cccc(OC)c4</chem>                               | 5.4 | 5.7 | 5.55 |
| 889 | MolPort-002-510-470 | <chem>OC=1C=C(OC(=O)C1C=2C[C@@H](Sc3cccc3N2)c4cc(OC)c(OC)c(OC)c4)C</chem>                              | 5.2 | 5.9 | 5.55 |
| 890 | MolPort-005-307-707 | <chem>O=C1C=C(c2ccc(OCc3nnnn3-c4ccc(OC)cc4)cc2O1)C</chem>                                              | 5.2 | 5.9 | 5.55 |
| 891 | MolPort-008-348-309 | <chem>O=C1C[C@@H](c2c(N1)c(en2-c3ccc(OC)cc3)C(O)=O)c4cccc(OC)c4</chem>                                 | 5.3 | 5.8 | 5.55 |
| 892 | SN00102409          | <chem>O=C1C[C@H](c2c(N1)c(en2-c3ccc(OC)cc3)C([O-])=O)c4ccc(OC)c(OC)cc4OC</chem>                        | 5.1 | 6.0 | 5.55 |
| 893 | SN00103067          | <chem>O=C1C[C@H](c2c(N1)c(en2-c3ccc(OC)cc3OC)C([O-])=O)c4cccc(OC)c4OC</chem>                           | 5.0 | 6.1 | 5.55 |
| 894 | ZINC05452024        | <chem>Oc1cc(OCC)ccc1-c2c(-c3ccc(OC)cc3)c(no2)C</chem>                                                  | 5.3 | 5.7 | 5.50 |
| 895 | MolPort-007-796-366 | <chem>O=C(NCc1ccc(OC)c(OC)c1)CCc2en(nc2-c3ccc(cc3)C)-c4cccc4</chem>                                    | 5.2 | 5.8 | 5.50 |
| 896 | MolPort-001-973-554 | <chem>O=C1C2=C(N(C(=O)N1C)C)NC=3c4cccc4C(=O)C3[C@@H]2c5cc(OC)c(OC)c(OC)c5</chem>                       | 5.1 | 5.8 | 5.45 |
| 897 | SN00102531          | <chem>O=C1C[C@H](c2c(N1)c(en2-c3ccc(OC)cc3)C([O-])=O)c4ccc(OC)c(OC)c4</chem>                           | 4.9 | 5.9 | 5.40 |
| 898 | MolPort-008-348-587 | <chem>O=C1C[C@H](c2c(N1)c(en2-c3ccc(OC)cc3)C(O)=O)c4ccc(OC)c(OC)c4OC</chem>                            | 5.2 | 5.5 | 5.35 |
| 899 | ZINC06786347        | <chem>O=C1C([O-])=C([C@@H](N1CCOC)c2ccc(O)c(OC)c2)C(=O)c3cccc3</chem>                                  | 4.9 | 5.8 | 5.35 |
| 900 | MolPort-035-701-663 | <chem>O=C(N1CCc2c3cccc3[nH]c2C1)C[C@H](c4ccc(OC)c(OC)c4)C5=C(O)C(=O)C=C(O5)C</chem>                    | 5.1 | 5.5 | 5.30 |
| 901 | MolPort-007-846-702 | <chem>O=C(NCCc1ccc(OC)c(OC)c1)C[C@H](n2cccc2)c3cccc3C</chem>                                           | 5.1 | 5.5 | 5.30 |
| 902 | MolPort-002-524-175 | <chem>Clc1ccc(C[C@@H](NC(=O)COc2cc(cc3c2C(C)=CC(O3)=O)C)C(O)=O)cc1</chem>                              | 4.8 | 5.8 | 5.30 |
| 903 | MolPort-002-528-359 | <chem>O=C(N[C@@H](Cc1c[nH]c2ccc(O)cc21)C(O)=O)[C@H](Oc3ccc4C=CC(Oc4c3)=O)C</chem>                      | 4.9 | 5.6 | 5.25 |
| 904 | SN00102042          | <chem>O=C1C[C@H](c2c(N1)c(en2-c3ccc(OC)cc3)C([O-])=O)c4ccc(OC)cc4OC</chem>                             | 4.6 | 5.8 | 5.20 |
| 905 | MolPort-002-571-308 | <chem>O=C1c2c(nc(n2Cc3cccc(c3)C)NCCN(C)C)N(C)C(=O)N1</chem>                                            | 4.7 | 5.4 | 5.05 |
| 906 | ZINC13409784        | <chem>S=C1NN=C(N1/N=C\c2ccc(OC)cc2)CCn3c(nc4cccc43)C</chem>                                            | 4.5 | 5.2 | 4.85 |
| 907 | SN00102051          | <chem>O=C1C[C@H](c2c(N1)c(en2-c3ccc(OC)cc3)C([O-])=O)c4cc(OC)c(OC)c(OC)c4</chem>                       | 4.2 | 5.5 | 4.85 |
| 908 | SN00102958          | <chem>O=C1C[C@@H](c2c(N1)c(en2-c3c(OC)ccc(OC)c3)C([O-])=O)c4ccc(OC)c(O)c4</chem>                       | 4.1 | 5.6 | 4.85 |
| 909 | ZINC20467021        | <chem>O[C@H]1[C@H](CC[C@@]2(CC[C@H](NC(=O)c3ccccc3)[C@@H]([C@H]12)C)C)[C@H](C(=O)N(CCC#N)C)C</chem>    | 4.5 | 5.0 | 4.75 |
| 910 | SN00086102          | <chem>OC=1C=C(OC(=O)C1C=2C[C@H](Sc3cccc3N2)c4cc(OC)c(OC)c(OC)c4)C</chem>                               | 4.0 | 5.3 | 4.65 |

**Table S1bis.** Structures, experimental and predicted (field and SVM) pKi values of the molecules in the training set

| n | Structure                                                                           | exp $pK_i$ | field $pK_i$ | SVM $pK_i$ |
|---|-------------------------------------------------------------------------------------|------------|--------------|------------|
| 1 | 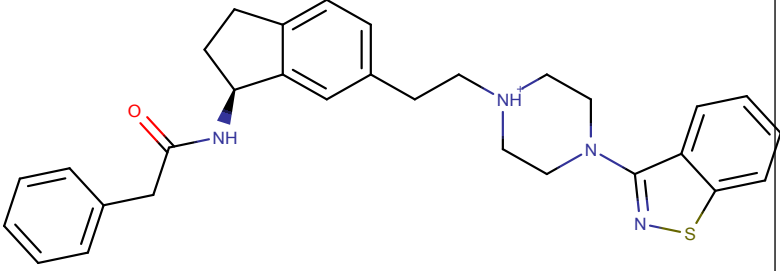  | 10.4       | 10.4         | 10.4       |
| 2 |   | 10.1       | 9.8          | 10         |
| 3 |  | 9.8        | 9.5          | 9.8        |
| 4 |  | 9.8        | 9.4          | 9.8        |



|   |                                                                                     |     |     |     |
|---|-------------------------------------------------------------------------------------|-----|-----|-----|
| 5 | 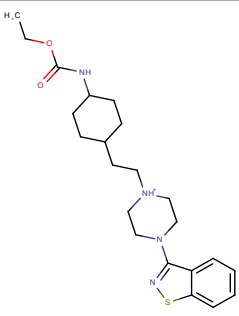   | 9.7 | 9.4 | 9.6 |
| 6 |    | 9.7 | 10  | 9.7 |
| 7 |   | 9.6 | 9   | 9.3 |
| 8 |  | 9.6 | 9.2 | 9.6 |
| 9 |  | 9.6 | 9.7 | 9.5 |

|    |                                                                                     |     |      |     |
|----|-------------------------------------------------------------------------------------|-----|------|-----|
| 10 | 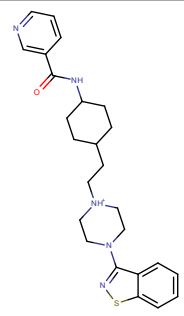   | 9.5 | 9.6  | 9.5 |
| 11 |   | 9.5 | 10.2 | 9.5 |
| 12 |   | 9.5 | 9    | 9.5 |
| 13 |  | 9.5 | 10   | 9.5 |
| 14 |  | 9.5 | 9.2  | 9.5 |

|    |  |     |     |     |
|----|--|-----|-----|-----|
| 15 |  | 9.4 | 10  | 9.4 |
| 16 |  | 9.3 | 9.1 | 9.3 |
| 17 |  | 9.3 | 8.8 | 9.2 |
| 18 |  | 9.2 | 9.2 | 9.2 |
| 19 |  | 9.2 | 9   | 9.2 |

|    |                                                                                     |     |     |     |
|----|-------------------------------------------------------------------------------------|-----|-----|-----|
| 20 | 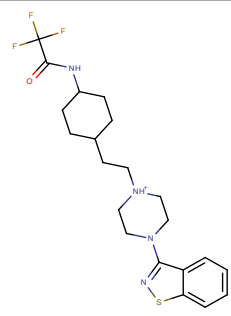   | 9.2 | 8.8 | 9.2 |
| 21 |    | 9.2 | 8.6 | 9.2 |
| 22 |   | 9.2 | 8.6 | 8.9 |
| 23 |  | 9.2 | 9.2 | 9.2 |
| 24 |  | 9.1 | 9.3 | 9.1 |

|    |                                                                                     |     |     |     |
|----|-------------------------------------------------------------------------------------|-----|-----|-----|
| 25 | 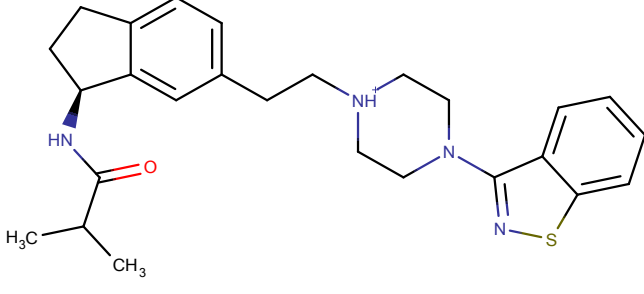  | 9.1 | 8.7 | 9.1 |
| 26 |    | 9.1 | 9.5 | 9.2 |
| 27 |   | 9.1 | 8.9 | 9   |
| 28 |  | 9   | 9.2 | 9   |
| 29 |  | 9   | 8.7 | 9   |

|    |                                                                                      |     |     |     |
|----|--------------------------------------------------------------------------------------|-----|-----|-----|
| 30 | 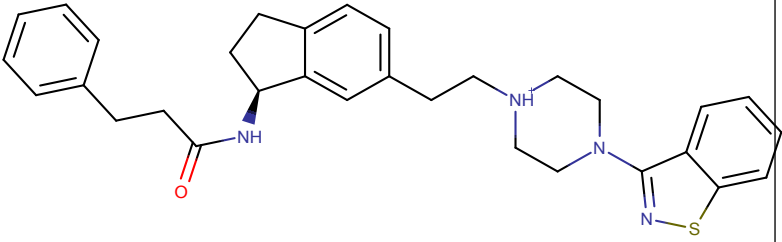   | 9   | 9.6 | 9   |
| 31 |     | 9   | 9   | 9   |
| 32 |    | 8.9 | 9.6 | 8.9 |
| 33 |   | 8.9 | 8.4 | 8.9 |
| 34 |  | 8.8 | 8.6 | 8.8 |

|    |                                                                                      |     |     |     |
|----|--------------------------------------------------------------------------------------|-----|-----|-----|
| 35 | 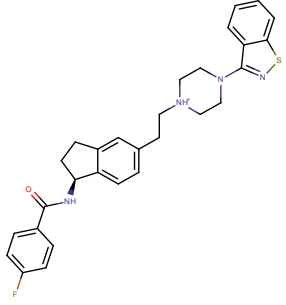    | 8.8 | 8.7 | 8.8 |
| 36 |     | 8.8 | 8.1 | 8.8 |
| 37 |    | 8.7 | 8.2 | 8.7 |
| 38 |   | 8.7 | 8.5 | 8.7 |
| 39 |  | 8.7 | 8.5 | 8.7 |

|    |                                                                                     |     |     |     |
|----|-------------------------------------------------------------------------------------|-----|-----|-----|
| 40 | 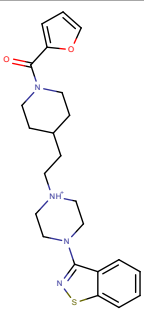   | 8.7 | 8.5 | 8.7 |
| 41 |    | 8.7 | 8.9 | 8.7 |
| 42 |   | 8.6 | 9.2 | 8.6 |
| 43 |  | 8.6 | 8.5 | 8.6 |
| 44 |  | 8.6 | 8.4 | 8.6 |



|    |                                                                                     |     |     |     |
|----|-------------------------------------------------------------------------------------|-----|-----|-----|
| 45 | 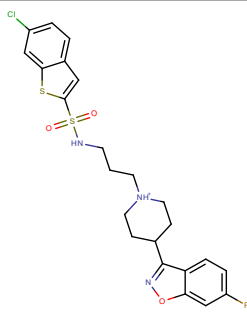   | 8.6 | 8.5 | 8.6 |
| 46 |   | 8.6 | 8.7 | 8.6 |
| 47 |   | 8.5 | 7.7 | 8.1 |
| 48 |  | 8.5 | 8.3 | 8.5 |
| 49 |  | 8.5 | 8.7 | 8.5 |

|    |                                                                                      |     |     |     |
|----|--------------------------------------------------------------------------------------|-----|-----|-----|
| 50 | 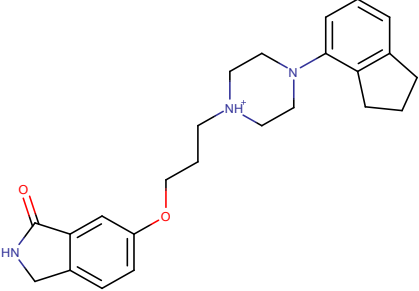    | 8.5 | 8.2 | 8.5 |
| 51 |     | 8.5 | 8.3 | 8.5 |
| 52 |    | 8.5 | 8.5 | 8.5 |
| 53 |  | 8.5 | 8.1 | 8.5 |
| 54 |   | 8.5 | 8.8 | 8.5 |

|    |                                                                                                                                                                                                                                                                                                                                                                                                                                                                                              |     |     |     |
|----|----------------------------------------------------------------------------------------------------------------------------------------------------------------------------------------------------------------------------------------------------------------------------------------------------------------------------------------------------------------------------------------------------------------------------------------------------------------------------------------------|-----|-----|-----|
| 55 | 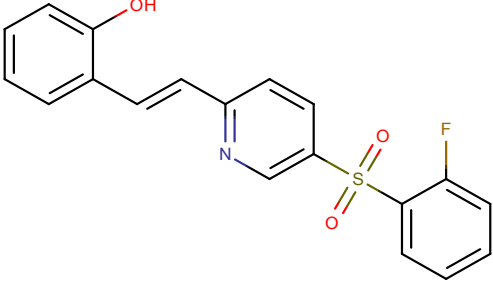 <p>Chemical structure of 4-(2-(4-hydroxyphenyl)vinyl)pyridine-3-sulfonamide. It features a pyridine ring with a sulfonamide group (-SO<sub>2</sub>NH<sub>2</sub>) at the 3-position and a 2-(4-hydroxyphenyl)vinyl group at the 4-position.</p>                                                                                                                                                            | 8.4 | 8.2 | 8.4 |
| 56 |  <p>Chemical structure of N-(4-(2-(4-(2-(2,2,2-trifluoroethoxy)phenyl)sulfonamido)ethyl)piperidin-1-yl)benzimidazole-5-carboxamide. It consists of a benzimidazole ring system with a 2-(2,2,2-trifluoroethoxy)phenyl group at the 5-position and a piperidine ring at the 2-position. The piperidine ring is further substituted with a 2-(4-(2-(2,2,2-trifluoroethoxy)phenyl)sulfonamido)ethyl group.</p> | 8.4 | 8.3 | 8.4 |
| 57 |  <p>Chemical structure of N-(4-(2-(4-(2-(4-methylphenyl)sulfonamido)ethyl)piperidin-1-yl)benzimidazole-5-carboxamide. It features a benzimidazole ring system with a 4-methylphenyl group at the 5-position and a piperidine ring at the 2-position. The piperidine ring is substituted with a 2-(4-(2-(4-methylphenyl)sulfonamido)ethyl) group.</p>                                                       | 8.4 | 8.2 | 8.4 |
| 58 |  <p>Chemical structure of N-(4-(2-(4-(2-(2,2,2-trifluoroethoxy)phenyl)sulfonamido)ethyl)piperidin-1-yl)benzimidazole-5-carboxamide. It consists of a benzimidazole ring system with a 2-(2,2,2-trifluoroethoxy)phenyl group at the 5-position and a piperidine ring at the 2-position. The piperidine ring is substituted with a 2-(4-(2-(2,2,2-trifluoroethoxy)phenyl)sulfonamido)ethyl group.</p>       | 8.4 | 8.5 | 8.4 |
| 59 |  <p>Chemical structure of N-(4-(2-(4-(2-(2,2,2-trifluoroethoxy)phenyl)sulfonamido)ethyl)piperidin-1-yl)benzimidazole-5-carboxamide. It features a benzimidazole ring system with a 2-(2,2,2-trifluoroethoxy)phenyl group at the 5-position and a piperidine ring at the 2-position. The piperidine ring is substituted with a 2-(4-(2-(2,2,2-trifluoroethoxy)phenyl)sulfonamido)ethyl group.</p>          | 8.4 | 7.8 | 8.4 |

|    |  |     |     |     |
|----|--|-----|-----|-----|
| 60 |  | 8.4 | 7.5 | 8.4 |
| 61 |  | 8.4 | 7.8 | 8.4 |
| 62 |  | 8.4 | 8.3 | 8.4 |
| 63 |  | 8.3 | 8   | 8.3 |
| 64 |  | 8.3 | 8.3 | 8.3 |

|    |                                                                                     |     |     |     |
|----|-------------------------------------------------------------------------------------|-----|-----|-----|
| 65 | 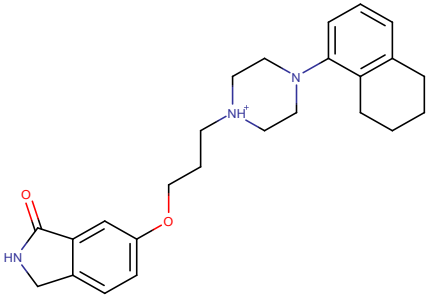   | 8.3 | 8.6 | 8.3 |
| 66 |    | 8.3 | 8.6 | 8.3 |
| 67 |   | 8.3 | 8   | 8.3 |
| 68 |  | 8.3 | 8.4 | 8.3 |
| 69 |  | 8.3 | 7.9 | 8.3 |

|    |  |     |     |     |
|----|--|-----|-----|-----|
| 70 |  | 8.3 | 7.7 | 7.7 |
| 71 |  | 8.3 | 8.4 | 8.3 |
| 72 |  | 8.3 | 8.4 | 8.3 |
| 73 |  | 8.3 | 7.7 | 8.3 |
| 74 |  | 8.2 | 8.5 | 8.2 |

|    |                                                                                     |     |     |     |
|----|-------------------------------------------------------------------------------------|-----|-----|-----|
| 75 | 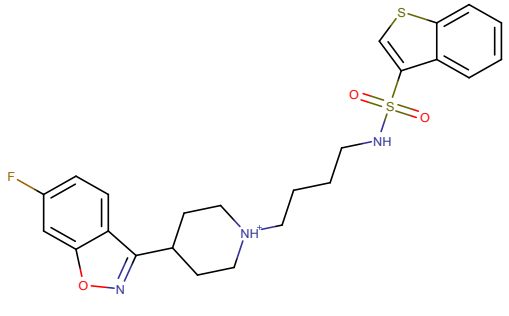   | 8.2 | 8.6 | 8.2 |
| 76 |    | 8.2 | 8.3 | 8.2 |
| 77 |   | 8.2 | 7.8 | 8.2 |
| 78 |  | 8.2 | 8.9 | 8.2 |
| 79 |  | 8.2 | 8.7 | 8.2 |

|    |  |     |     |     |
|----|--|-----|-----|-----|
| 80 |  | 8.2 | 8.3 | 8.2 |
| 81 |  | 8.2 | 7.9 | 8.1 |
| 82 |  | 8.1 | 7.9 | 8.1 |
| 83 |  | 8.1 | 7.6 | 8.1 |
| 84 |  | 8.1 | 7.7 | 8   |



|    |                                                                                     |     |     |     |
|----|-------------------------------------------------------------------------------------|-----|-----|-----|
| 85 | 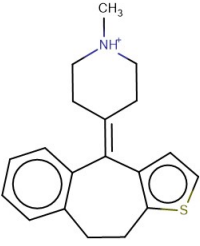   | 8.1 | 7.5 | 8   |
| 86 |    | 8.1 | 7.7 | 8.1 |
| 87 |   | 8.1 | 8.3 | 8.1 |
| 88 |  | 8.1 | 8   | 8.1 |
| 89 |  | 8.1 | 7.6 | 8.1 |

|    |                                                                                     |     |     |     |
|----|-------------------------------------------------------------------------------------|-----|-----|-----|
| 90 | 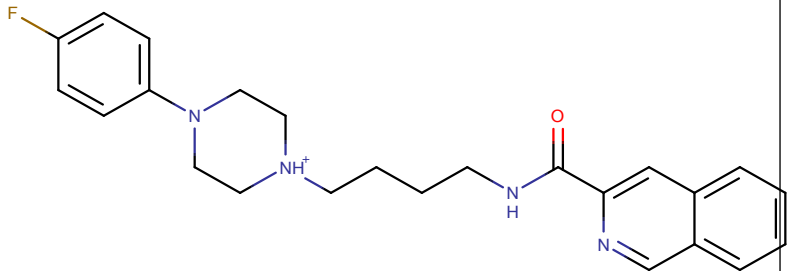  | 8.1 | 7.7 | 8.1 |
| 91 |    | 8.1 | 7.7 | 8.1 |
| 92 |   | 8.1 | 7.9 | 8.1 |
| 93 |  | 8.1 | 7.8 | 8.1 |
| 94 |  | 8.1 | 8.2 | 8.1 |

|    |                                                                                     |     |     |     |
|----|-------------------------------------------------------------------------------------|-----|-----|-----|
| 95 | 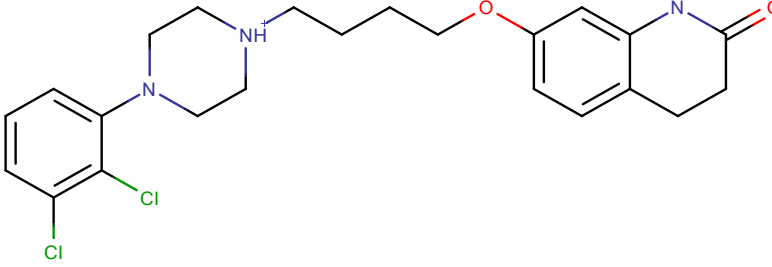  | 8.1 | 7.6 | 8.1 |
| 96 |    | 8.1 | 8.5 | 8.1 |
| 97 |   | 8   | 7.8 | 8   |
| 98 |  | 8   | 7.6 | 8   |
| 99 |  | 8   | 8.2 | 8   |

|     |                                                                                     |   |     |     |
|-----|-------------------------------------------------------------------------------------|---|-----|-----|
| 100 | 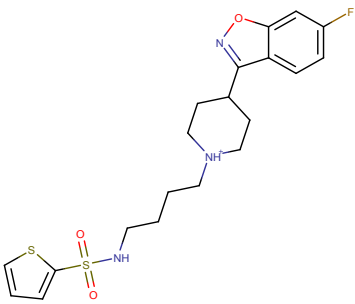   | 8 | 8.4 | 8   |
| 101 |    | 8 | 7.4 | 7.9 |
| 102 |   | 8 | 7.7 | 8   |
| 103 |  | 8 | 8.2 | 8   |
| 104 |  | 8 | 8.5 | 8   |

|     |                                                                                     |   |     |   |
|-----|-------------------------------------------------------------------------------------|---|-----|---|
| 105 | 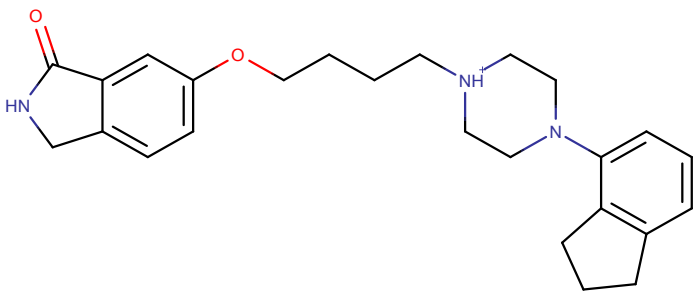  | 8 | 7.8 | 8 |
| 106 |   | 8 | 7.4 | 8 |
| 107 |  | 8 | 8.4 | 8 |
| 108 |  | 8 | 8.1 | 8 |
| 109 |  | 8 | 7.8 | 8 |

|     |                                                                                      |     |     |     |
|-----|--------------------------------------------------------------------------------------|-----|-----|-----|
| 110 | 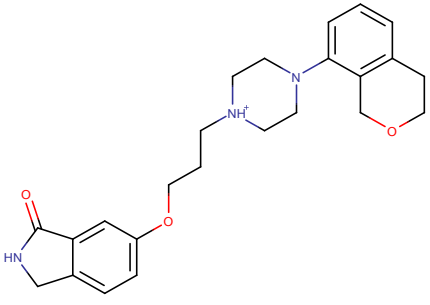    | 8   | 7.6 | 8   |
| 111 |     | 8   | 8.2 | 7.9 |
| 112 |   | 7.9 | 7.6 | 7.9 |
| 113 |   | 7.9 | 8.2 | 7.9 |
| 114 |  | 7.9 | 7.7 | 7.9 |

|     |                                                                                     |     |     |     |
|-----|-------------------------------------------------------------------------------------|-----|-----|-----|
| 115 | 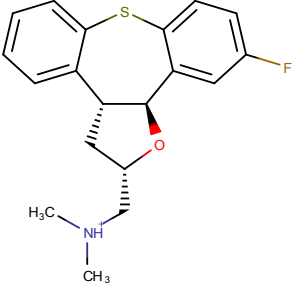   | 7.9 | 7.4 | 7.9 |
| 116 |    | 7.9 | 7.9 | 7.9 |
| 117 |   | 7.9 | 7.7 | 7.9 |
| 118 |  | 7.9 | 7.8 | 7.8 |
| 119 |  | 7.9 | 8.2 | 7.9 |

|     |                                                                                     |     |     |     |
|-----|-------------------------------------------------------------------------------------|-----|-----|-----|
| 120 | 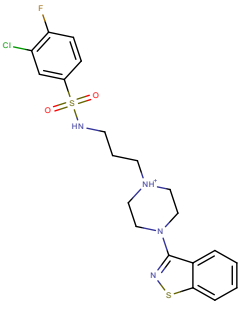   | 7.9 | 8.4 | 7.9 |
| 121 |   | 7.8 | 7.4 | 7.8 |
| 122 |  | 7.8 | 7.9 | 7.8 |
| 123 |  | 7.8 | 8.2 | 7.8 |
| 124 |  | 7.8 | 7.5 | 7.8 |



|     |                                                                                      |     |     |     |
|-----|--------------------------------------------------------------------------------------|-----|-----|-----|
| 125 | 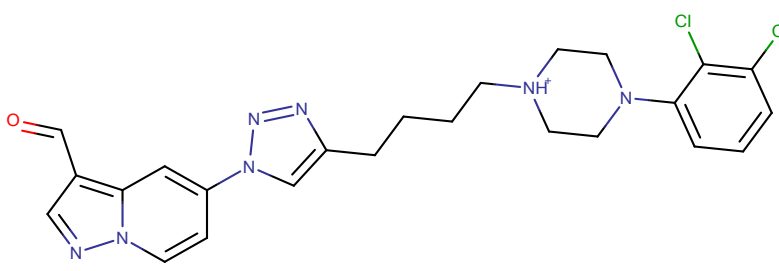   | 7.8 | 8.2 | 7.8 |
| 126 |     | 7.8 | 8   | 7.8 |
| 127 |   | 7.8 | 7.8 | 7.8 |
| 128 |  | 7.8 | 7.5 | 7.8 |
| 129 |   | 7.8 | 8.6 | 7.8 |

|     |  |     |     |     |
|-----|--|-----|-----|-----|
| 130 |  | 7.8 | 8.1 | 7.8 |
| 131 |  | 7.8 | 7.9 | 7.8 |
| 132 |  | 7.8 | 7.3 | 7.5 |
| 133 |  | 7.8 | 7.9 | 7.8 |
| 134 |  | 7.8 | 7.8 | 7.8 |

|     |                                                                                      |     |     |     |
|-----|--------------------------------------------------------------------------------------|-----|-----|-----|
| 135 | 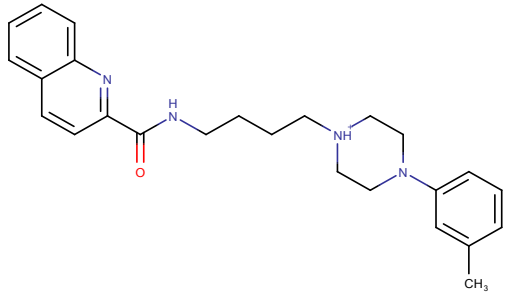    | 7.8 | 7.4 | 7.8 |
| 136 |    | 7.8 | 7.4 | 7.8 |
| 137 |    | 7.8 | 7.2 | 7.6 |
| 138 |  | 7.8 | 7.8 | 7.8 |
| 139 |   | 7.8 | 7.5 | 7.8 |

|     |                                                                                     |     |     |     |
|-----|-------------------------------------------------------------------------------------|-----|-----|-----|
| 140 | 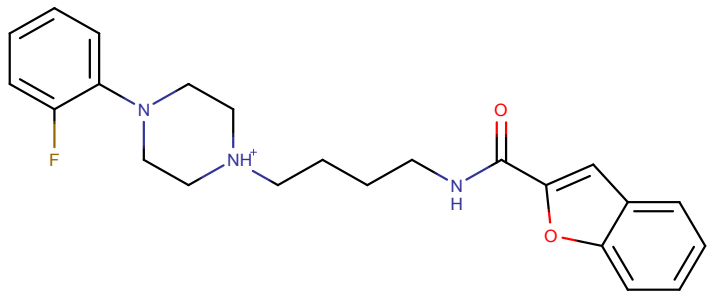  | 7.7 | 7.4 | 7.7 |
| 141 |    | 7.7 | 7.7 | 7.7 |
| 142 |   | 7.7 | 8   | 7.7 |
| 143 |  | 7.7 | 8   | 7.7 |
| 144 |  | 7.7 | 7.3 | 7.7 |

|     |                                                                                      |     |     |     |
|-----|--------------------------------------------------------------------------------------|-----|-----|-----|
| 145 | 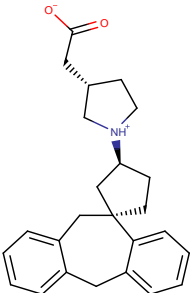    | 7.7 | 6.9 | 7.2 |
| 146 |     | 7.7 | 7.8 | 7.7 |
| 147 |    | 7.7 | 7.2 | 7.7 |
| 148 |  | 7.6 | 7.6 | 7.6 |
| 149 |   | 7.6 | 7.3 | 7.5 |

|     |                                                                                     |     |     |     |
|-----|-------------------------------------------------------------------------------------|-----|-----|-----|
| 150 | 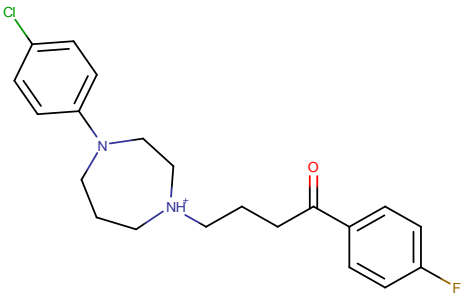   | 7.6 | 7.5 | 7.6 |
| 151 |   | 7.6 | 7.4 | 7.6 |
| 152 |   | 7.6 | 7.4 | 7.6 |
| 153 |  | 7.6 | 8.2 | 7.6 |
| 154 |  | 7.6 | 8   | 7.6 |

|     |                                                                                      |     |     |     |
|-----|--------------------------------------------------------------------------------------|-----|-----|-----|
| 155 | 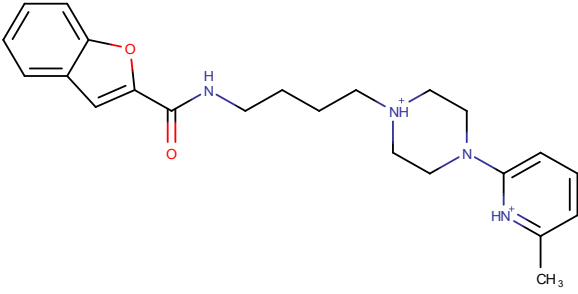    | 7.6 | 8   | 7.6 |
| 156 |     | 7.6 | 7.1 | 7.5 |
| 157 |    | 7.5 | 7.3 | 7.5 |
| 158 |   | 7.5 | 7.4 | 7.5 |
| 159 |  | 7.5 | 7.4 | 7.5 |

|     |                                                                                      |     |     |     |
|-----|--------------------------------------------------------------------------------------|-----|-----|-----|
| 160 | 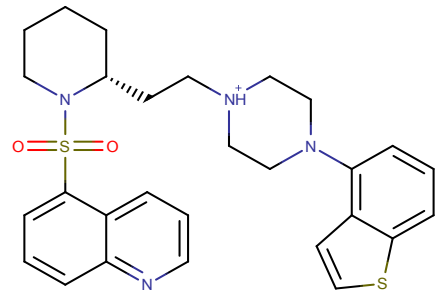    | 7.5 | 7.2 | 7.5 |
| 161 |     | 7.4 | 7.5 | 7.4 |
| 162 |    | 7.4 | 7.3 | 7.4 |
| 163 |  | 7.4 | 7.1 | 7.4 |
| 164 |   | 7.4 | 7.1 | 7.4 |



|     |                                                                                     |     |     |     |
|-----|-------------------------------------------------------------------------------------|-----|-----|-----|
| 165 | 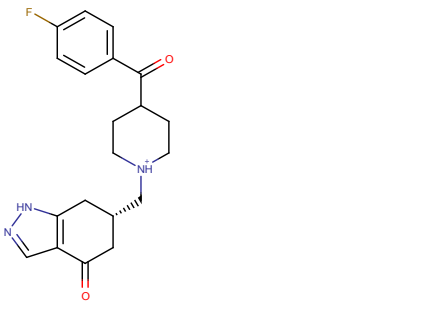  | 7.4 | 6.8 | 7.4 |
| 166 |   | 7.3 | 7.9 | 7.3 |
| 167 |  | 7.3 | 7.2 | 7.3 |
| 168 |  | 7.3 | 7.1 | 7.3 |
| 169 |  | 7.3 | 7.2 | 7.3 |

|     |                                                                                     |     |     |     |
|-----|-------------------------------------------------------------------------------------|-----|-----|-----|
| 170 | 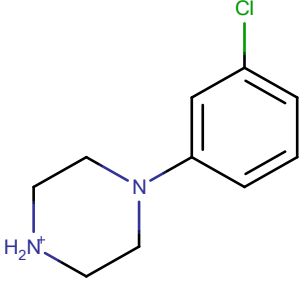   | 7.3 | 6.9 | 7   |
| 171 |    | 7.3 | 7   | 7.3 |
| 172 |   | 7.3 | 7.3 | 7.3 |
| 173 |  | 7.2 | 7   | 7.2 |
| 174 |  | 7.2 | 6.5 | 6.9 |

|     |                                                                                     |     |     |     |
|-----|-------------------------------------------------------------------------------------|-----|-----|-----|
| 175 | 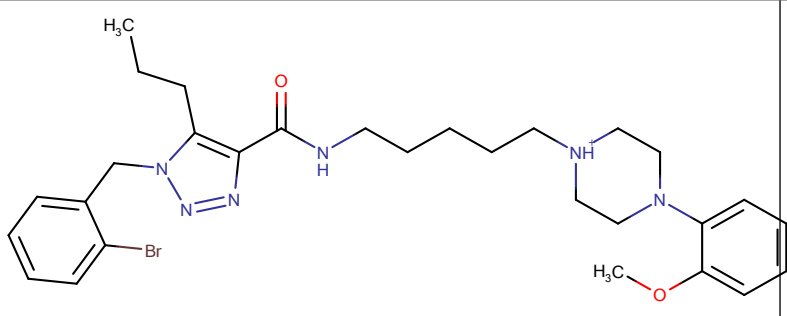  | 7.2 | 7.7 | 7.2 |
| 176 |    | 7.2 | 6.9 | 7.2 |
| 177 |   | 7.2 | 7.9 | 7.7 |
| 178 |  | 7.2 | 6.7 | 6.8 |
| 179 |  | 7.2 | 7.1 | 7.2 |

|     |                                                                                      |     |     |     |
|-----|--------------------------------------------------------------------------------------|-----|-----|-----|
| 180 | 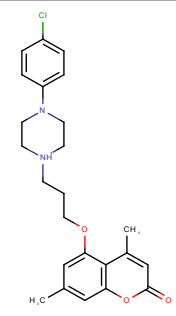    | 7.2 | 7.4 | 7.2 |
| 181 |     | 7.1 | 7.2 | 7.1 |
| 182 |    | 7.1 | 8   | 7.1 |
| 183 |  | 7.1 | 7.1 | 7.1 |
| 184 |   | 7.1 | 6.5 | 7   |

|     |                                                                                     |     |     |     |
|-----|-------------------------------------------------------------------------------------|-----|-----|-----|
| 185 | 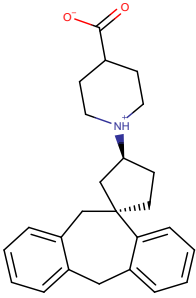   | 7.1 | 7.1 | 7.1 |
| 186 |    | 7.1 | 6.8 | 7.1 |
| 187 |  | 7   | 7.6 | 7.3 |
| 188 |  | 7   | 6.9 | 7   |
| 189 |  | 7   | 7.2 | 7   |

|     |                                                                                      |   |     |   |
|-----|--------------------------------------------------------------------------------------|---|-----|---|
| 190 | 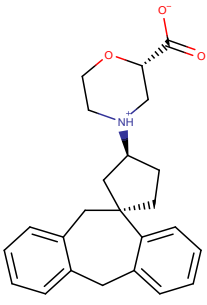    | 7 | 6.7 | 7 |
| 191 |     | 7 | 6.9 | 7 |
| 192 |   | 7 | 7   | 7 |
| 193 |  | 7 | 7.5 | 7 |
| 194 |   | 7 | 6.8 | 7 |

|     |  |     |     |     |
|-----|--|-----|-----|-----|
| 195 |  | 7   | 7   | 7   |
| 196 |  | 7   | 6.5 | 7   |
| 197 |  | 7   | 7.1 | 7   |
| 198 |  | 6.9 | 6.4 | 6.8 |
| 199 |  | 6.9 | 6.9 | 6.9 |

|     |                                                                                     |     |     |     |
|-----|-------------------------------------------------------------------------------------|-----|-----|-----|
| 200 | 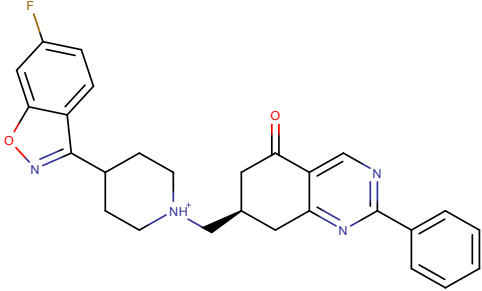   | 6.9 | 7.3 | 6.9 |
| 201 |    | 6.9 | 6.7 | 6.9 |
| 202 |   | 6.9 | 6.4 | 6.9 |
| 203 |  | 6.9 | 6.8 | 6.9 |
| 204 |  | 6.9 | 6.8 | 6.9 |



|     |                                                                                     |     |     |     |
|-----|-------------------------------------------------------------------------------------|-----|-----|-----|
| 205 | 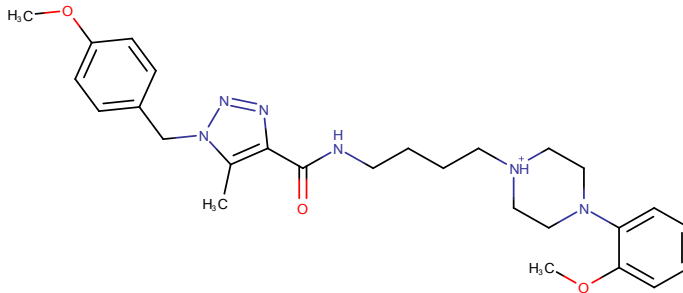  | 6.9 | 6.5 | 6.9 |
| 206 |   | 6.9 | 6.5 | 6.8 |
| 207 |   | 6.8 | 6.6 | 6.8 |
| 208 |  | 6.8 | 6.9 | 6.8 |
| 209 |  | 6.8 | 7.1 | 6.8 |

|     |                                                                                     |     |     |     |
|-----|-------------------------------------------------------------------------------------|-----|-----|-----|
| 210 | 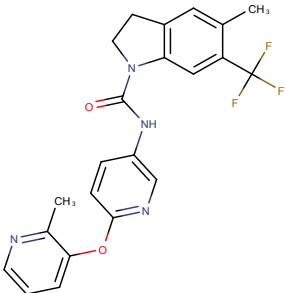   | 6.8 | 6.5 | 6.8 |
| 211 |   | 6.8 | 7.4 | 7.2 |
| 212 |   | 6.8 | 6.7 | 6.8 |
| 213 |  | 6.8 | 6.5 | 6.8 |
| 214 |  | 6.8 | 6.2 | 6.8 |

|     |                                                                                      |     |     |     |
|-----|--------------------------------------------------------------------------------------|-----|-----|-----|
| 215 | 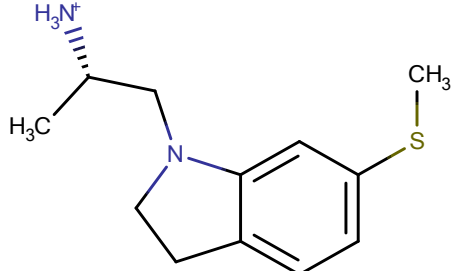    | 6.8 | 6.6 | 6.8 |
| 216 |     | 6.7 | 6.8 | 6.7 |
| 217 |   | 6.7 | 6.8 | 6.7 |
| 218 |  | 6.7 | 7.2 | 6.7 |
| 219 |   | 6.7 | 7.2 | 6.7 |

|     |                                                                                      |     |     |     |
|-----|--------------------------------------------------------------------------------------|-----|-----|-----|
| 220 | 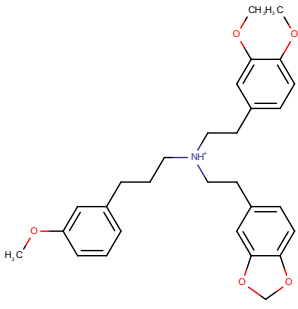    | 6.7 | 7.1 | 6.7 |
| 221 |    | 6.7 | 7.1 | 6.7 |
| 222 |    | 6.7 | 6.6 | 6.7 |
| 223 |   | 6.7 | 6.5 | 6.7 |
| 224 |  | 6.7 | 6.8 | 6.7 |

|     |                                                                                     |     |     |     |
|-----|-------------------------------------------------------------------------------------|-----|-----|-----|
| 225 | 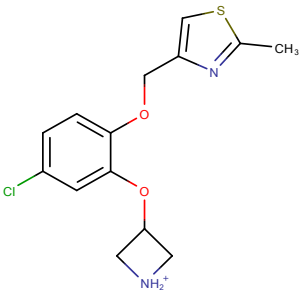   | 6.7 | 6.7 | 6.7 |
| 226 |    | 6.6 | 6.8 | 6.8 |
| 227 |   | 6.6 | 6.2 | 6.6 |
| 228 |  | 6.6 | 7.2 | 6.6 |
| 229 |  | 6.6 | 6.4 | 6.6 |

|     |                                                                                      |     |     |     |
|-----|--------------------------------------------------------------------------------------|-----|-----|-----|
| 230 | 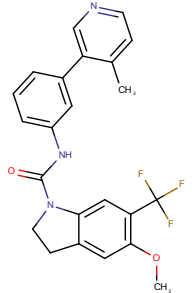    | 6.6 | 6.3 | 6.6 |
| 231 |     | 6.6 | 6.2 | 6.6 |
| 232 |   | 6.6 | 6.4 | 6.6 |
| 233 |   | 6.6 | 6.6 | 6.6 |
| 234 |  | 6.6 | 6.9 | 6.6 |

|     |                                                                                     |     |     |     |
|-----|-------------------------------------------------------------------------------------|-----|-----|-----|
| 235 | 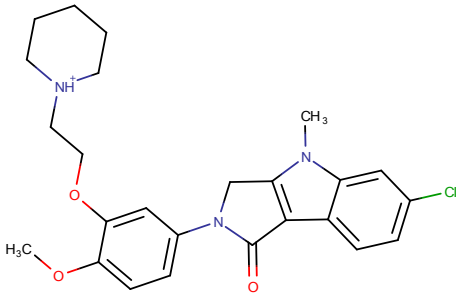   | 6.5 | 6.4 | 6.5 |
| 236 |    | 6.5 | 6.2 | 6.5 |
| 237 |  | 6.5 | 7.2 | 7.2 |
| 238 |  | 6.5 | 6.3 | 6.5 |
| 239 |  | 6.5 | 6.8 | 6.7 |

|     |                                                                                     |     |     |     |
|-----|-------------------------------------------------------------------------------------|-----|-----|-----|
| 240 | 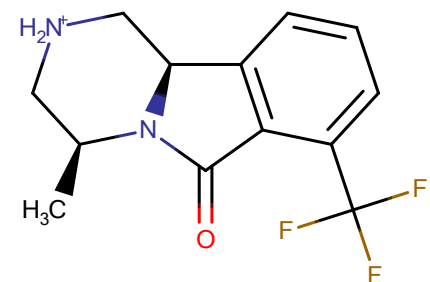   | 6.4 | 6.7 | 6.6 |
| 241 |    | 6.4 | 6.4 | 6.4 |
| 242 |   | 6.4 | 7   | 6.9 |
| 243 |  | 6.4 | 6.3 | 6.4 |
| 244 |  | 6.4 | 6.5 | 6.4 |



|     |                                                                                     |     |     |     |
|-----|-------------------------------------------------------------------------------------|-----|-----|-----|
| 245 | 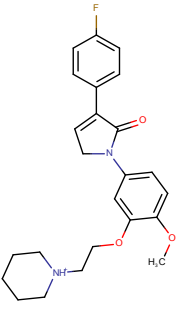   | 6.4 | 6.2 | 6.4 |
| 246 |    | 6.4 | 6.3 | 6.4 |
| 247 |   | 6.4 | 7.1 | 7.1 |
| 248 |  | 6.4 | 6.4 | 6.4 |
| 249 |  | 6.4 | 6.5 | 6.4 |

|     |                                                                                     |     |     |     |
|-----|-------------------------------------------------------------------------------------|-----|-----|-----|
| 250 | 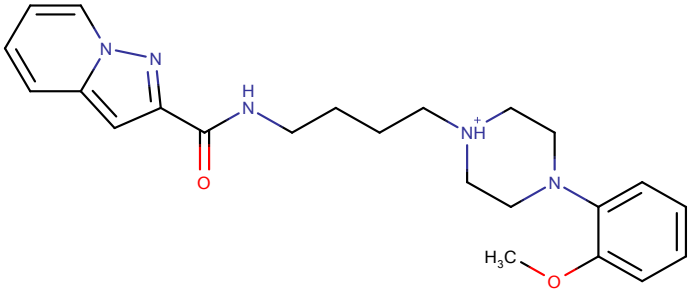  | 6.4 | 6.8 | 6.4 |
| 251 |    | 6.4 | 6.6 | 6.4 |
| 252 |   | 6.3 | 6.4 | 6.3 |
| 253 |  | 6.3 | 6.8 | 6.3 |
| 254 |  | 6.3 | 6.2 | 6.3 |

|     |                                                                                     |     |     |     |
|-----|-------------------------------------------------------------------------------------|-----|-----|-----|
| 255 | 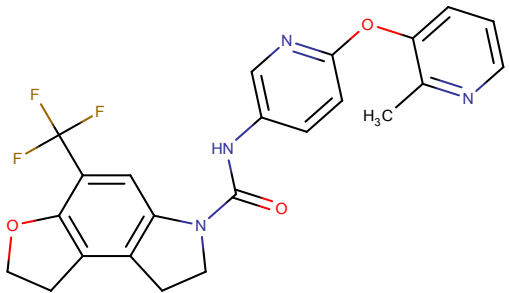   | 6.3 | 6.3 | 6.3 |
| 256 |    | 6.3 | 6   | 6.3 |
| 257 |   | 6.3 | 6.4 | 6.2 |
| 258 |  | 6.2 | 6.9 | 6.7 |
| 259 |  | 6.2 | 6.4 | 6.2 |

|     |                                                                                      |     |     |     |
|-----|--------------------------------------------------------------------------------------|-----|-----|-----|
| 260 | 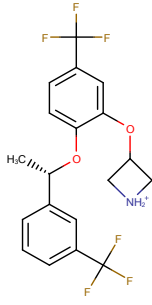    | 6.2 | 6.5 | 6.2 |
| 261 |     | 6.2 | 6.3 | 6.2 |
| 262 |   | 6.2 | 6.9 | 6.6 |
| 263 |  | 6.2 | 6.8 | 6.2 |
| 264 |   | 6.2 | 6.5 | 6.2 |

|     |                                                                                     |     |     |     |
|-----|-------------------------------------------------------------------------------------|-----|-----|-----|
| 265 | 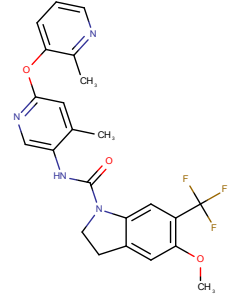   | 6.2 | 6.3 | 6.2 |
| 266 |   | 6.2 | 7   | 6.2 |
| 267 |   | 6.2 | 6.3 | 6.2 |
| 268 |  | 6.1 | 6.8 | 6.5 |
| 269 |  | 6.1 | 6.1 | 6.1 |

|     |                                                                                     |     |     |     |
|-----|-------------------------------------------------------------------------------------|-----|-----|-----|
| 270 | 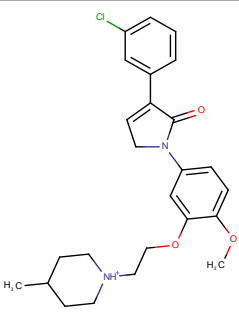   | 6.1 | 6.1 | 6.1 |
| 271 |    | 6.1 | 6.5 | 6.1 |
| 272 |   | 6.1 | 6.5 | 6.3 |
| 273 |  | 6.1 | 6.6 | 6.1 |
| 274 |  | 6.1 | 6.3 | 6.1 |

|     |                                                                                      |   |     |     |
|-----|--------------------------------------------------------------------------------------|---|-----|-----|
| 275 | 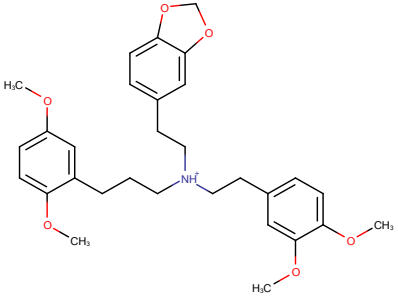    | 6 | 6.5 | 6   |
| 276 |     | 6 | 6.1 | 6   |
| 277 |    | 6 | 5.9 | 6   |
| 278 |   | 6 | 6.2 | 6   |
| 279 |  | 6 | 6.3 | 6.4 |

|     |                                                                                     |     |     |     |
|-----|-------------------------------------------------------------------------------------|-----|-----|-----|
| 280 | 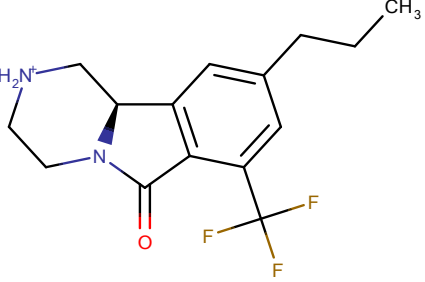   | 6   | 6.1 | 6   |
| 281 |    | 5.9 | 6.2 | 5.9 |
| 282 |   | 5.9 | 6.4 | 6.3 |
| 283 |  | 5.9 | 6.1 | 5.9 |
| 284 |  | 5.9 | 6.1 | 5.9 |



|     |                                                                                     |     |     |     |
|-----|-------------------------------------------------------------------------------------|-----|-----|-----|
| 285 | 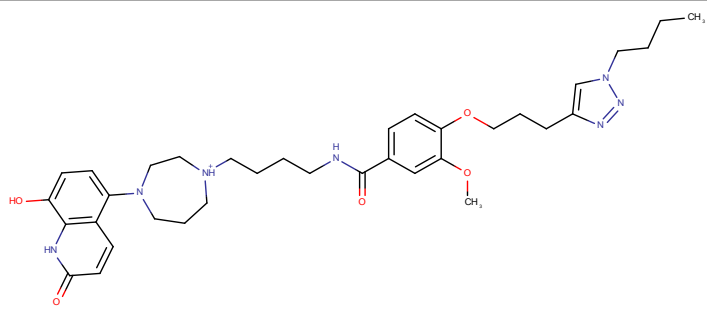  | 5.8 | 6   | 5.8 |
| 286 |    | 5.8 | 5.9 | 5.8 |
| 287 |  | 5.8 | 5.9 | 5.8 |
| 288 |  | 5.7 | 6.3 | 6   |
| 289 |  | 5.7 | 6.2 | 5.7 |

|     |  |     |     |     |
|-----|--|-----|-----|-----|
| 290 |  | 5.7 | 6.4 | 5.7 |
| 291 |  | 5.7 | 6.2 | 5.7 |
| 292 |  | 5.6 | 5.6 | 5.6 |
| 293 |  | 5.6 | 5.9 | 5.7 |
| 294 |  | 5.6 | 6.2 | 5.7 |

|     |                                                                                      |     |     |     |
|-----|--------------------------------------------------------------------------------------|-----|-----|-----|
| 295 | 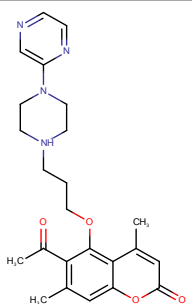    | 5.5 | 6   | 5.5 |
| 296 |    | 5.5 | 5.8 | 5.5 |
| 297 |    | 5.4 | 6.2 | 6.1 |
| 298 |  | 5.4 | 5   | 5.3 |
| 299 |   | 5.3 | 6   | 5.4 |

|     |                                                                                   |     |     |     |
|-----|-----------------------------------------------------------------------------------|-----|-----|-----|
| 300 | 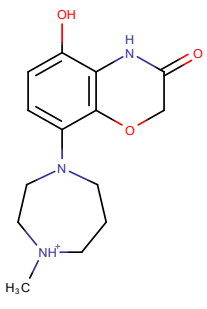 | 5.2 | 5.9 | 5.7 |
|-----|-----------------------------------------------------------------------------------|-----|-----|-----|

**Table S2bis.** Structures, experimental and predicted (field and SVM) p*K*<sub>i</sub> values of the molecules in the test set

| n | Structure                                                                           | exp <i>pK</i> <sub>i</sub> | field <i>pK</i> <sub>i</sub> | SVM <i>pK</i> <sub>i</sub> |
|---|-------------------------------------------------------------------------------------|----------------------------|------------------------------|----------------------------|
| 1 | 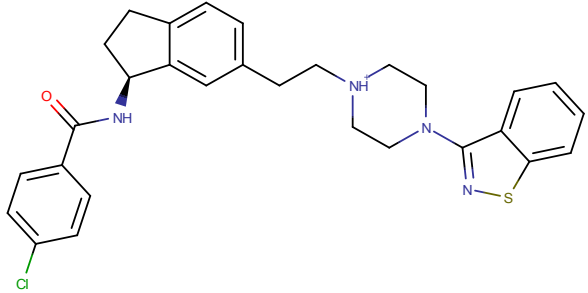 | 10                         | 9.2                          | 8.8                        |
| 2 |  | 9.5                        | 8.9                          | 8.6                        |

|   |                                                                                      |     |     |     |
|---|--------------------------------------------------------------------------------------|-----|-----|-----|
| 3 | 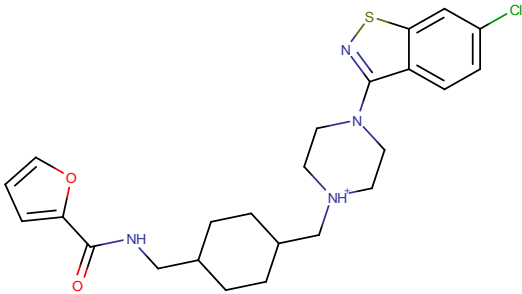    | 9.5 | 9.3 | 9   |
| 4 |     | 9.4 | 8.7 | 8.8 |
| 5 |    | 9.3 | 9.5 | 9.5 |
| 6 |   | 9.2 | 8.2 | 8.3 |
| 7 |  | 8.9 | 8.4 | 8.4 |

|    |                                                                                     |     |     |     |
|----|-------------------------------------------------------------------------------------|-----|-----|-----|
|    |                                                                                     |     |     |     |
| 8  | 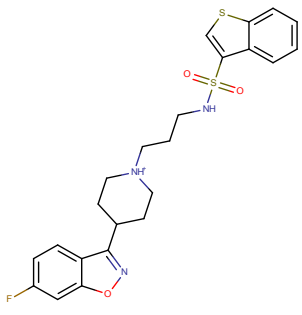   | 8.8 | 8.7 | 8.8 |
| 9  |  | 8.8 | 8.7 | 8.6 |
| 10 |  | 8.7 | 9.1 | 9   |
| 11 |  | 8.6 | 7.6 | 7.6 |

|    |                                                                                     |     |     |     |
|----|-------------------------------------------------------------------------------------|-----|-----|-----|
| 12 | 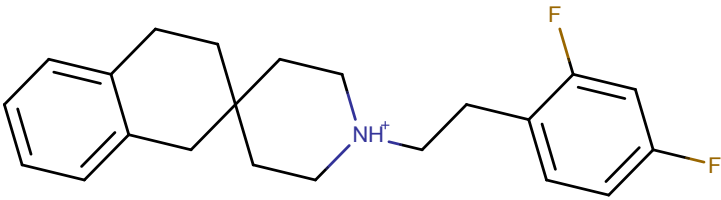  | 8.5 | 8.3 | 8.3 |
| 13 |    | 8.5 | 7.8 | 8.1 |
| 14 |  | 8.4 | 8   | 7.9 |
| 15 |  | 8.3 | 8.1 | 8.1 |
| 16 |  | 8.3 | 7.7 | 8.1 |

|    |  |     |     |     |
|----|--|-----|-----|-----|
|    |  |     |     |     |
| 17 |  | 8.3 | 8.3 | 8.3 |
| 18 |  | 8.3 | 9   | 8.2 |
| 19 |  | 8.2 | 8.6 | 8.4 |
| 20 |  | 8.2 | 7.7 | 7.8 |



|    |                                                                                     |     |     |     |
|----|-------------------------------------------------------------------------------------|-----|-----|-----|
| 21 | 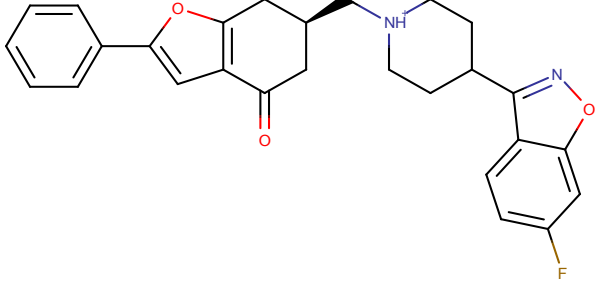   | 8.2 | 8.7 | 8.6 |
| 22 |   | 8.1 | 8.1 | 8   |
| 23 |   | 8.1 | 7.4 | 7.5 |
| 24 |  | 8.1 | 7   | 7.1 |
| 25 |  | 8   | 8   | 8.2 |

|    |                                                                                     |     |     |     |
|----|-------------------------------------------------------------------------------------|-----|-----|-----|
|    |                                                                                     |     |     |     |
| 26 | 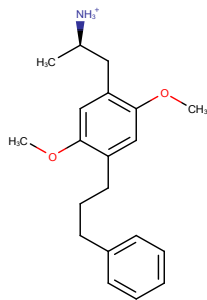   | 8   | 7.9 | 8   |
| 27 |  | 8   | 7.5 | 7.8 |
| 28 |  | 7.9 | 7.3 | 7.4 |
| 29 |  | 7.9 | 7.7 | 7.7 |

|    |                                                                                      |     |     |     |
|----|--------------------------------------------------------------------------------------|-----|-----|-----|
| 30 | 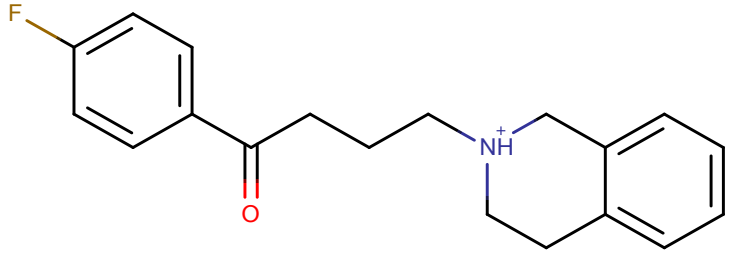   | 7.9 | 7.7 | 7.7 |
| 31 |     | 7.8 | 8   | 7.7 |
| 32 |  | 7.8 | 8.2 | 8.6 |
| 33 |  | 7.8 | 8.3 | 8.2 |
| 34 |  | 7.8 | 7.8 | 7.8 |

|    |                                                                                     |     |     |     |
|----|-------------------------------------------------------------------------------------|-----|-----|-----|
|    |                                                                                     |     |     |     |
| 35 | 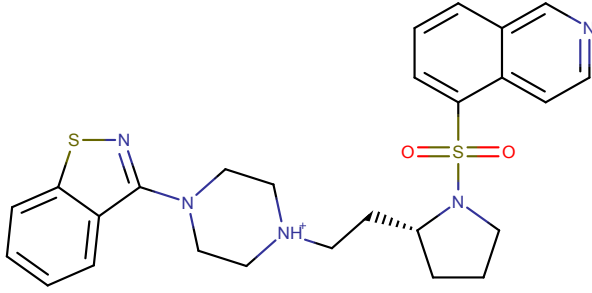   | 7.7 | 7.5 | 7.6 |
| 36 |   | 7.7 | 8.1 | 7.9 |
| 37 |  | 7.6 | 6.8 | 6.7 |
| 38 |  | 7.5 | 8   | 7.6 |

|    |                                                                                     |     |     |     |
|----|-------------------------------------------------------------------------------------|-----|-----|-----|
| 39 | 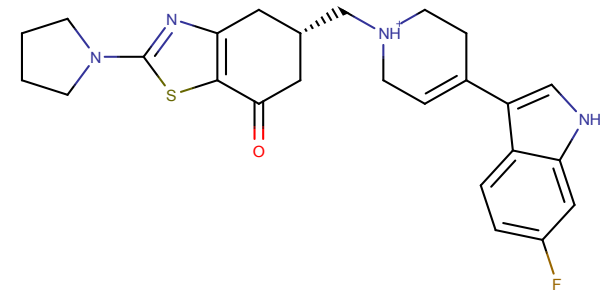   | 7.4 | 7.8 | 7.9 |
| 40 |    | 7.4 | 7.5 | 7.4 |
| 41 |  | 7.3 | 7.7 | 7.7 |
| 42 |  | 7.2 | 6.9 | 7.1 |
| 43 |  | 7.2 | 7.3 | 7.2 |

|    |  |     |     |     |
|----|--|-----|-----|-----|
|    |  |     |     |     |
| 44 |  | 7.1 | 6.6 | 7   |
| 45 |  | 7   | 6.9 | 7   |
| 46 |  | 7   | 8   | 8   |
| 47 |  | 7   | 6.4 | 6.5 |

|    |                                                                                                                                                                                                                                                                                                                                                                                                                                                         |     |     |     |
|----|---------------------------------------------------------------------------------------------------------------------------------------------------------------------------------------------------------------------------------------------------------------------------------------------------------------------------------------------------------------------------------------------------------------------------------------------------------|-----|-----|-----|
| 48 | 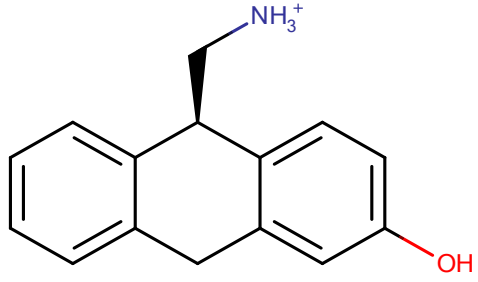 <p>Chemical structure of 1-(2-hydroxyphenyl)propan-2-ylammonium. It features a central carbon atom bonded to a phenyl ring, a methyl group, and a protonated amino group (<math>\text{NH}_3^+</math>). The phenyl ring has a hydroxyl group (<math>\text{OH}</math>) at the ortho position.</p>                                                                       | 7   | 7.1 | 7.1 |
| 49 |  <p>Chemical structure of a complex heterocyclic molecule. It consists of a central benzimidazole-like core with a methyl group (<math>\text{CH}_3</math>) and a trifluoromethyl group (<math>\text{CF}_3</math>) on the benzene ring, and a pyridine ring substituted with a fluorine atom (<math>\text{F}</math>) and a methyl group (<math>\text{CH}_3</math>).</p> | 6.9 | 6.9 | 7.2 |
| 50 |  <p>Chemical structure of a complex heterocyclic molecule. It features a central benzimidazole-like core with a piperazine ring attached to the imidazole nitrogen, and a chlorine atom (<math>\text{Cl}</math>) on the benzene ring.</p>                                                                                                                             | 6.9 | 6.2 | 6.4 |
| 51 |  <p>Chemical structure of a complex heterocyclic molecule. It features a central benzimidazole-like core with a nitrile group (<math>\text{C}\equiv\text{N}</math>) on the benzene ring, a piperazine ring attached to the imidazole nitrogen, and a 3,5-difluorophenyl group attached to the piperazine ring.</p>                                                   | 6.8 | 7.6 | 7.5 |
| 52 |  <p>Chemical structure of a complex heterocyclic molecule. It features a central benzimidazole-like core with a methyl group (<math>\text{CH}_3</math>) and a chlorine atom (<math>\text{Cl}</math>) on the benzene ring, and a pyridine ring substituted with a methyl group (<math>\text{CH}_3</math>) and a methoxy group (<math>\text{OCH}_3</math>).</p>        | 6.8 | 6.4 | 6.4 |

|    |  |     |     |     |
|----|--|-----|-----|-----|
|    |  |     |     |     |
| 53 |  | 6.8 | 7.5 | 7.6 |
| 54 |  | 6.7 | 6.7 | 6.5 |
| 55 |  | 6.7 | 7   | 7.2 |
| 56 |  | 6.6 | 7.1 | 7.5 |



|    |                                                                                     |     |     |     |
|----|-------------------------------------------------------------------------------------|-----|-----|-----|
| 57 | 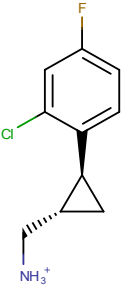   | 6.6 | 6.4 | 6.6 |
| 58 |    | 6.5 | 7.5 | 7.3 |
| 59 |  | 6.5 | 7.2 | 7.4 |
| 60 |  | 6.4 | 6.4 | 6.9 |
| 61 |  | 6.4 | 6.9 | 7   |

|    |                                                                                      |     |     |     |
|----|--------------------------------------------------------------------------------------|-----|-----|-----|
|    |                                                                                      |     |     |     |
| 62 | 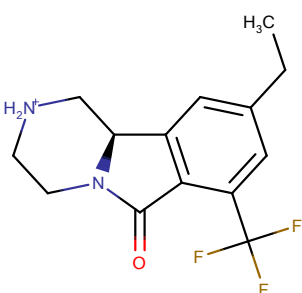    | 6.4 | 5.8 | 5.7 |
| 63 |    | 6.3 | 5.7 | 5.6 |
| 64 |  | 6.3 | 6.9 | 6.9 |
| 65 |   | 6.2 | 5.8 | 5.6 |

|    |                                                                                     |     |     |     |
|----|-------------------------------------------------------------------------------------|-----|-----|-----|
| 66 | 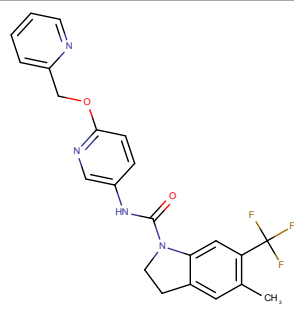   | 6.2 | 7.1 | 7.1 |
| 67 |    | 6.2 | 6.5 | 6.4 |
| 68 |   | 6.1 | 5.9 | 6.1 |
| 69 |  | 6.1 | 6.5 | 7   |
| 70 |  | 6   | 7.4 | 7.1 |

|    |                                                                                     |     |     |     |
|----|-------------------------------------------------------------------------------------|-----|-----|-----|
|    |                                                                                     |     |     |     |
| 71 | 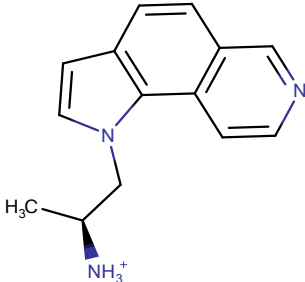   | 6   | 6.7 | 6.7 |
| 72 |   | 5.8 | 6.1 | 6.4 |
| 73 |  | 5.8 | 6.9 | 7   |
| 74 |  | 5.4 | 5.8 | 5.8 |

|    |                                                                                   |     |     |     |
|----|-----------------------------------------------------------------------------------|-----|-----|-----|
| 75 | 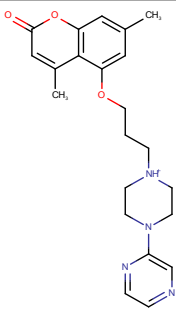 | 5.3 | 5.5 | 5.7 |
|----|-----------------------------------------------------------------------------------|-----|-----|-----|

**Table S4bis.** Calculated  $\text{field}pK_i$ ,  $\text{SVM}pK_i$  and  $\text{mean}pK_i$  for the natural products screening and structures

| n | name         | Structure                                                                            | $\text{field}pK_i$ | $\text{SVM}pK_i$ | $\text{mean}pK_i$ |
|---|--------------|--------------------------------------------------------------------------------------|--------------------|------------------|-------------------|
| 1 | ZINC08856435 | 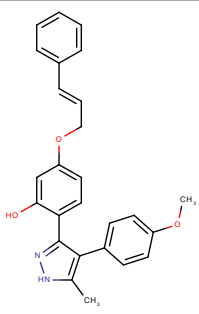  | 9.1                | 9.2              | 9.15              |
| 2 | ZINC00006368 |   | 8.9                | 9                | 8.95              |
| 3 | ZINC11867629 |  | 9                  | 8.9              | 8.95              |

|   |              |                                                                                      |     |     |      |
|---|--------------|--------------------------------------------------------------------------------------|-----|-----|------|
|   |              |                                                                                      |     |     |      |
| 4 | ZINC72116881 | 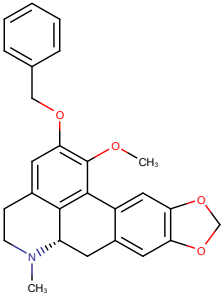    | 8.7 | 9   | 8.9  |
| 5 | ZINC00607997 |   | 9   | 8.8 | 8.9  |
| 6 | ZINC68576530 |  | 8.7 | 8.8 | 8.75 |
| 7 | ZINC12660071 |  | 9   | 8.2 | 8.6  |

|    |              |                                                                                     |     |     |      |
|----|--------------|-------------------------------------------------------------------------------------|-----|-----|------|
| 8  | ZINC13690010 | 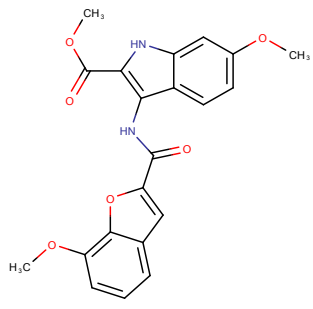   | 8.9 | 8.2 | 8.55 |
| 9  | ZINC05219478 |    | 8.7 | 8.4 | 8.55 |
| 10 | ZINC09187792 |   | 8.6 | 8.5 | 8.55 |
| 11 | 12190        |  | 8.9 | 8.1 | 8.5  |
| 12 | ZINC09410825 |  | 8.5 | 8.5 | 8.5  |

|    |                     |                                                                                     |     |     |      |
|----|---------------------|-------------------------------------------------------------------------------------|-----|-----|------|
| 13 | MolPort-006-334-884 | 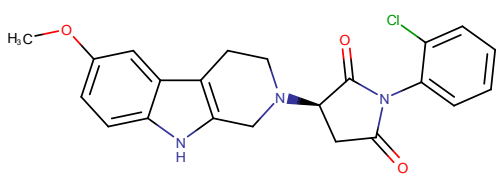  | 8.5 | 8.5 | 8.5  |
| 14 | ZINC39354033        |    | 8.5 | 8.4 | 8.45 |
| 15 | ZINC20591088        |   | 8.5 | 8.4 | 8.45 |
| 16 | ZINC09130703        |  | 8.4 | 8.5 | 8.45 |
| 17 | ZINC05343552        |  | 8.4 | 8.4 | 8.4  |



|    |              |                                                                                     |     |     |      |
|----|--------------|-------------------------------------------------------------------------------------|-----|-----|------|
| 18 | ZINC16036365 | 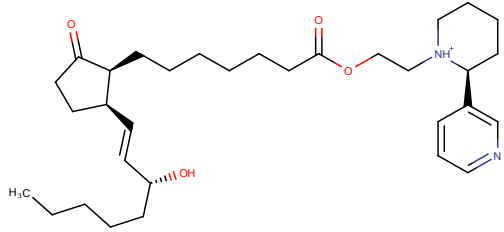  | 8.3 | 8.5 | 8.4  |
| 19 | ZINC09187797 |    | 8.4 | 8.3 | 8.35 |
| 20 | 157207-88-0  |   | 8.4 | 8.3 | 8.35 |
| 21 | ZINC09418544 |  | 8.3 | 8.4 | 8.35 |
| 22 | ZINC09130113 |  | 8.3 | 8.4 | 8.35 |

|    |                     |                                                                                      |     |     |      |
|----|---------------------|--------------------------------------------------------------------------------------|-----|-----|------|
| 23 | MolPort-002-530-410 | 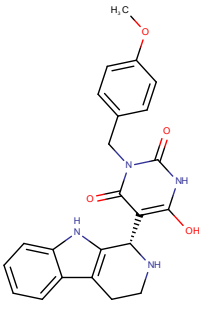    | 8.5 | 8.2 | 8.35 |
| 24 | SN00009552          |     | 8.5 | 8.2 | 8.35 |
| 25 | ZINC09130734        |    | 8.4 | 8.2 | 8.3  |
| 26 | ZINC09409677        |   | 8.4 | 8.2 | 8.3  |
| 27 | ZINC08791003        |  | 8.4 | 8.2 | 8.3  |

|    |              |                                                                                      |     |     |      |
|----|--------------|--------------------------------------------------------------------------------------|-----|-----|------|
| 28 | ZINC09130659 | 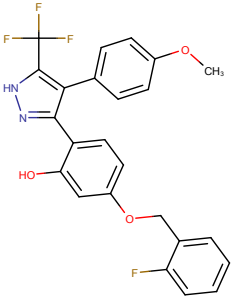    | 8.4 | 8.1 | 8.25 |
| 29 | 6932         |    | 8.3 | 8.2 | 8.25 |
| 30 | ZINC08972988 |    | 8.3 | 8.2 | 8.25 |
| 31 | SN00149601   |   | 8.3 | 8.2 | 8.25 |
| 32 | SN00061787   |  | 8.3 | 8.1 | 8.2  |

|    |                     |                                                                                      |     |     |     |
|----|---------------------|--------------------------------------------------------------------------------------|-----|-----|-----|
| 33 | ZINC09129618        | 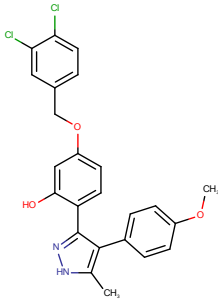    | 8.3 | 8.1 | 8.2 |
| 34 | ZINC08973292        |     | 8.2 | 8.2 | 8.2 |
| 35 | ZINC09187780        |    | 8.2 | 8.2 | 8.2 |
| 36 | ZINC68572101        |  | 8.2 | 8.2 | 8.2 |
| 37 | MolPort-001-016-686 |  | 8.1 | 8.3 | 8.2 |

|    |                     |                                                                                     |     |     |      |
|----|---------------------|-------------------------------------------------------------------------------------|-----|-----|------|
| 38 | ZINC08973452        | 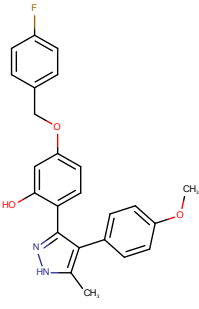   | 8.1 | 8.3 | 8.2  |
| 39 | MolPort-002-535-647 |   | 8.3 | 8   | 8.15 |
| 40 | ZINC09410789        |   | 8.1 | 8.2 | 8.15 |
| 41 | MolPort-027-852-775 |  | 8.1 | 8.2 | 8.15 |
| 42 | ZINC09409653        |  | 8.1 | 8.2 | 8.15 |

|    |                     |                                                                                     |     |     |      |
|----|---------------------|-------------------------------------------------------------------------------------|-----|-----|------|
| 43 | MolPort-001-738-042 | 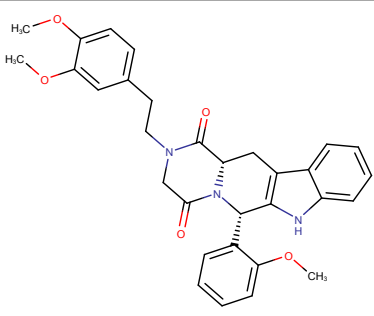   | 8.1 | 8.2 | 8.15 |
| 44 | SN00148291          |    | 7.9 | 8.3 | 8.1  |
| 45 | ZINC20466733        |  | 8.1 | 8.1 | 8.1  |
| 46 | SN00147982          |  | 8   | 8.2 | 8.1  |
| 47 | ZINC04235438        |  | 8.2 | 7.9 | 8.05 |

|    |              |                                                                                     |     |     |      |
|----|--------------|-------------------------------------------------------------------------------------|-----|-----|------|
| 48 | ZINC02098147 | 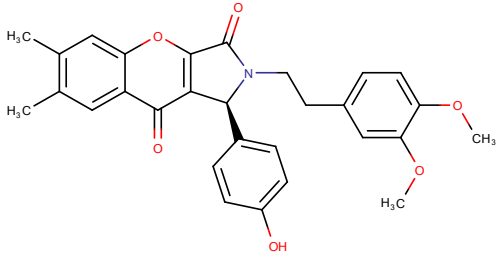  | 8   | 8.1 | 8.05 |
| 49 | ZINC20411284 |   | 8   | 8.1 | 8.05 |
| 50 | ZINC09410809 |   | 8.1 | 7.9 | 8    |
| 51 | ZINC09421984 |  | 8.1 | 7.9 | 8    |
| 52 | ZINC70672992 |  | 8   | 8   | 8    |

|    |                     |                                                                                     |     |     |      |
|----|---------------------|-------------------------------------------------------------------------------------|-----|-----|------|
| 53 | ZINC11866356        | 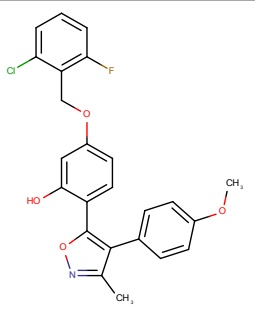   | 8   | 8   | 8    |
| 54 | ZINC01780045        |   | 7.9 | 8.1 | 8    |
| 55 | ZINC11866343        |   | 7.8 | 8.2 | 8    |
| 56 | ZINC09186350        |  | 7.8 | 8.2 | 8    |
| 57 | MolPort-002-511-872 |  | 8   | 7.9 | 7.95 |



|    |                     |  |     |     |      |
|----|---------------------|--|-----|-----|------|
| 58 | ZINC02122370        |  | 8   | 7.9 | 7.95 |
| 59 | ZINC09409699        |  | 8   | 7.9 | 7.95 |
| 60 | ZINC02429597        |  | 7.9 | 8   | 7.95 |
| 61 | MolPort-000-424-288 |  | 7.9 | 8   | 7.95 |
| 62 | ZINC11866321        |  | 7.9 | 8   | 7.95 |

|    |              |                                                                                      |     |     |      |
|----|--------------|--------------------------------------------------------------------------------------|-----|-----|------|
| 63 | ZINC08972974 | 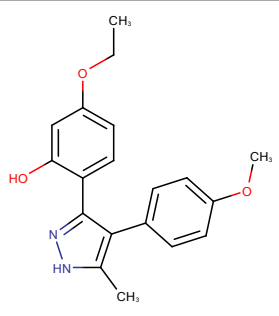    | 7.9 | 8   | 7.95 |
| 64 | ZINC12898513 |    | 8.1 | 7.8 | 7.95 |
| 65 | 147293-04-7  |   | 8.1 | 7.8 | 7.95 |
| 66 | SN00031093   |  | 8.1 | 7.8 | 7.95 |
| 67 | ZINC02149559 |  | 7.8 | 8.1 | 7.95 |

|    |                     |                                                                                      |     |     |      |
|----|---------------------|--------------------------------------------------------------------------------------|-----|-----|------|
| 68 | ZINC03840589        | 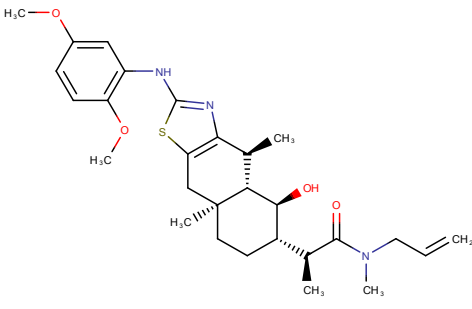   | 7.8 | 8.1 | 7.95 |
| 69 | MolPort-002-518-881 |    | 7.7 | 8.2 | 7.95 |
| 70 | ZINC05190540        |    | 8.1 | 7.7 | 7.9  |
| 71 | MolPort-009-649-103 |  | 8   | 7.8 | 7.9  |
| 72 | ZINC02319891        |  | 8   | 7.8 | 7.9  |

|    |              |                                                                                     |     |     |      |
|----|--------------|-------------------------------------------------------------------------------------|-----|-----|------|
| 73 | ZINC05572691 | 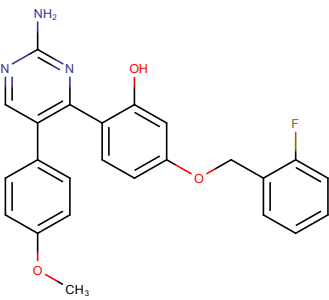   | 7.9 | 7.9 | 7.9  |
| 74 | ZINC08845645 |    | 7.6 | 8.2 | 7.9  |
| 75 | ZINC02412441 |  | 8   | 7.7 | 7.85 |
| 76 | ZINC09129491 |  | 7.9 | 7.8 | 7.85 |
| 77 | ZINC01322966 |  | 7.9 | 7.8 | 7.85 |

|    |              |                                                                                      |     |     |      |
|----|--------------|--------------------------------------------------------------------------------------|-----|-----|------|
| 78 | ZINC09409930 | 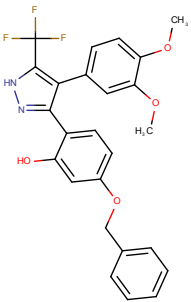    | 7.9 | 7.8 | 7.85 |
| 79 | ZINC08791787 |    | 7.9 | 7.8 | 7.85 |
| 80 | ZINC48057077 |   | 7.8 | 7.9 | 7.85 |
| 81 | ZINC04267171 |   | 7.8 | 7.9 | 7.85 |
| 82 | ZINC20466528 |  | 7.8 | 7.9 | 7.85 |

|    |              |  |     |     |      |
|----|--------------|--|-----|-----|------|
| 83 | ZINC01792699 |  | 7.8 | 7.9 | 7.85 |
| 84 | ZINC11866287 |  | 7.8 | 7.9 | 7.85 |
| 85 | ZINC08970919 |  | 7.7 | 8   | 7.85 |
| 86 | SN00149108   |  | 7.7 | 8   | 7.85 |
| 87 | ZINC47284531 |  | 7.6 | 8.1 | 7.85 |

|    |                     |                                                                                     |     |     |     |
|----|---------------------|-------------------------------------------------------------------------------------|-----|-----|-----|
| 88 | ZINC08996172        | 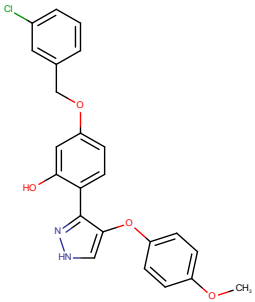   | 7.7 | 7.9 | 7.8 |
| 89 | ZINC03983996        |   | 7.7 | 7.9 | 7.8 |
| 90 | ZINC12900696        |  | 8.1 | 7.5 | 7.8 |
| 91 | ZINC04267149        |  | 8   | 7.6 | 7.8 |
| 92 | MolPort-035-700-739 |  | 7.8 | 7.8 | 7.8 |

|    |              |                                                                                     |     |     |     |
|----|--------------|-------------------------------------------------------------------------------------|-----|-----|-----|
| 93 | ZINC20759596 | 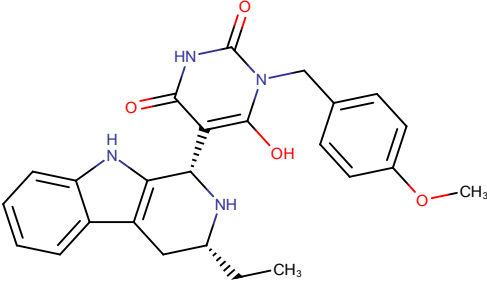  | 7.8 | 7.8 | 7.8 |
| 94 | ZINC11866347 |    | 7.8 | 7.8 | 7.8 |
| 95 | ZINC13571467 |   | 7.8 | 7.8 | 7.8 |
| 96 | ZINC09575415 |  | 7.8 | 7.8 | 7.8 |
| 97 | ZINC09410298 |  | 7.6 | 8   | 7.8 |



|     |                     |                                                                                      |     |     |      |
|-----|---------------------|--------------------------------------------------------------------------------------|-----|-----|------|
| 98  | ZINC02158608        | 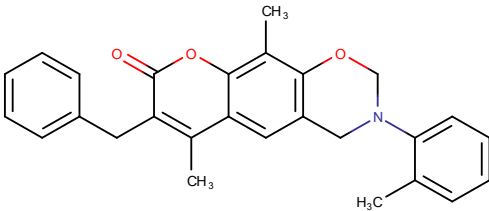   | 7.6 | 8   | 7.8  |
| 99  | ZINC20760972        |     | 7.5 | 8.1 | 7.8  |
| 100 | SN00149302          |    | 7.4 | 8.2 | 7.8  |
| 101 | ZINC02107196        |   | 7.9 | 7.6 | 7.75 |
| 102 | MolPort-002-517-334 |  | 7.9 | 7.6 | 7.75 |

|     |                     |                                                                                     |     |     |      |
|-----|---------------------|-------------------------------------------------------------------------------------|-----|-----|------|
| 103 | ZINC09130740        | 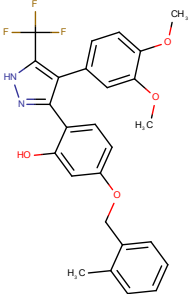   | 7.8 | 7.7 | 7.75 |
| 104 | MolPort-027-852-794 |    | 7.8 | 7.7 | 7.75 |
| 105 | ZINC19893649        |  | 7.8 | 7.7 | 7.75 |
| 106 | ZINC01280062        |  | 7.7 | 7.8 | 7.75 |
| 107 | ZINC09130747        |  | 7.7 | 7.8 | 7.75 |

|     |                     |                                                                                      |     |     |      |
|-----|---------------------|--------------------------------------------------------------------------------------|-----|-----|------|
| 108 | MolPort-046-594-356 | 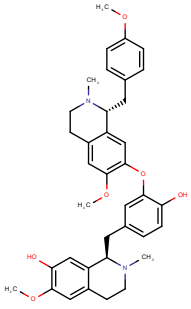    | 7.7 | 7.8 | 7.75 |
| 109 | ZINC02667596        |     | 7.7 | 7.8 | 7.75 |
| 110 | MolPort-000-826-974 |   | 7.6 | 7.9 | 7.75 |
| 111 | ZINC02114178        |   | 7.6 | 7.9 | 7.75 |
| 112 | SN00382560          |  | 7.6 | 7.9 | 7.75 |

|     |              |  |     |     |      |
|-----|--------------|--|-----|-----|------|
| 113 | SN00151289   |  | 7.6 | 7.9 | 7.75 |
| 114 | ZINC02147505 |  | 7.5 | 8   | 7.75 |
| 115 | SN00147957   |  | 7.5 | 8   | 7.75 |
| 116 | ZINC08792424 |  | 7.7 | 7.7 | 7.7  |
| 117 | ZINC08789180 |  | 7.7 | 7.7 | 7.7  |

|     |                     |                                                                                      |     |     |     |
|-----|---------------------|--------------------------------------------------------------------------------------|-----|-----|-----|
| 118 | ZINC70669913        | 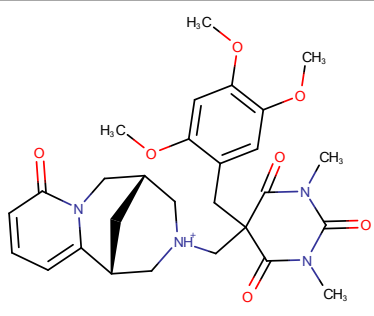    | 7.7 | 7.7 | 7.7 |
| 119 | ZINC20611836        |    | 7.5 | 7.9 | 7.7 |
| 120 | ZINC05452205        |    | 7.5 | 7.9 | 7.7 |
| 121 | ZINC02155319        |  | 7.8 | 7.6 | 7.7 |
| 122 | MolPort-002-528-757 |  | 7.8 | 7.6 | 7.7 |

|     |                     |                                                                                      |     |     |     |
|-----|---------------------|--------------------------------------------------------------------------------------|-----|-----|-----|
| 123 | MolPort-001-737-511 | 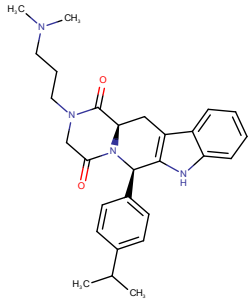    | 7.8 | 7.6 | 7.7 |
| 124 | 20164               |    | 7.6 | 7.8 | 7.7 |
| 125 | MolPort-000-812-834 |   | 7.6 | 7.8 | 7.7 |
| 126 | ZINC03846610        |  | 7.6 | 7.8 | 7.7 |
| 127 | 8159                |  | 7.6 | 7.8 | 7.7 |

|     |                     |                                                                                      |     |     |      |
|-----|---------------------|--------------------------------------------------------------------------------------|-----|-----|------|
| 128 | ZINC13181151        | 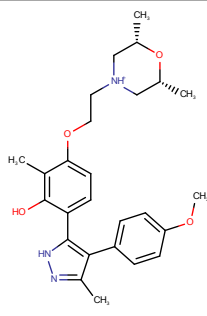    | 7.9 | 7.4 | 7.65 |
| 129 | ZINC48057072        |     | 7.8 | 7.5 | 7.65 |
| 130 | MolPort-002-524-694 |    | 7.8 | 7.5 | 7.65 |
| 131 | MolPort-002-520-663 |  | 7.8 | 7.5 | 7.65 |
| 132 | ZINC31170105        |   | 7.7 | 7.6 | 7.65 |

|     |              |                                                                                      |     |     |      |
|-----|--------------|--------------------------------------------------------------------------------------|-----|-----|------|
| 133 | 11064        | 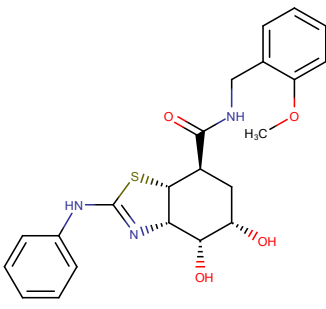    | 7.6 | 7.7 | 7.65 |
| 134 | ZINC09410850 |     | 7.6 | 7.7 | 7.65 |
| 135 | ZINC17058595 |    | 7.6 | 7.7 | 7.65 |
| 136 | ZINC00083643 |  | 7.6 | 7.7 | 7.65 |
| 137 | ZINC08790710 |  | 7.6 | 7.7 | 7.65 |



|     |                     |                                                                                      |     |     |      |
|-----|---------------------|--------------------------------------------------------------------------------------|-----|-----|------|
| 138 | ZINC05156892        | 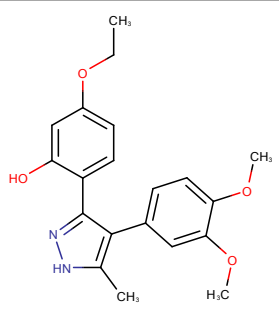    | 7.5 | 7.8 | 7.65 |
| 139 | MolPort-021-745-971 |     | 7.5 | 7.8 | 7.65 |
| 140 | ZINC04236981        |    | 7.4 | 7.9 | 7.65 |
| 141 | ZINC04090087        |  | 7.9 | 7.3 | 7.6  |
| 142 | MolPort-002-530-479 |  | 7.7 | 7.5 | 7.6  |

|     |              |  |     |     |     |
|-----|--------------|--|-----|-----|-----|
| 143 | ZINC08993461 |  | 7.6 | 7.6 | 7.6 |
| 144 | ZINC09059912 |  | 7.6 | 7.6 | 7.6 |
| 145 | ZINC20466291 |  | 7.6 | 7.6 | 7.6 |
| 146 | ZINC01321188 |  | 7.5 | 7.7 | 7.6 |
| 147 | ZINC79188720 |  | 7.5 | 7.7 | 7.6 |

|     |              |                                                                                     |     |     |     |
|-----|--------------|-------------------------------------------------------------------------------------|-----|-----|-----|
| 148 | ZINC09128884 | 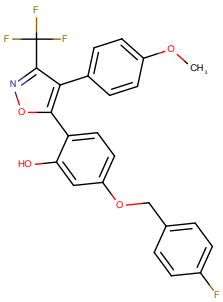   | 7.5 | 7.7 | 7.6 |
| 149 | ZINC00627450 |   | 7.5 | 7.7 | 7.6 |
| 150 | ZINC02147037 |   | 7.5 | 7.7 | 7.6 |
| 151 | ZINC08789652 |  | 7.5 | 7.7 | 7.6 |
| 152 | 19285        |  | 7.4 | 7.8 | 7.6 |

|     |                     |  |     |     |      |
|-----|---------------------|--|-----|-----|------|
| 153 | MolPort-039-057-114 |  | 7.3 | 7.9 | 7.6  |
| 154 | MolPort-002-518-975 |  | 7.7 | 7.4 | 7.55 |
| 155 | ZINC15675098        |  | 7.7 | 7.4 | 7.55 |
| 156 | 20512               |  | 7.4 | 7.7 | 7.55 |
| 157 | ZINC02316741        |  | 7.4 | 7.7 | 7.55 |

|     |              |                                                                                      |     |     |      |
|-----|--------------|--------------------------------------------------------------------------------------|-----|-----|------|
| 158 | SN00147842   | 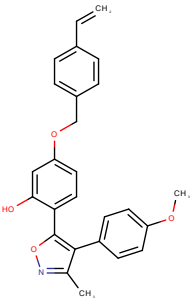    | 7.4 | 7.7 | 7.55 |
| 159 | SN00149300   |     | 7.2 | 7.9 | 7.55 |
| 160 | ZINC72324873 |    | 7.6 | 7.5 | 7.55 |
| 161 | SN00151276   |   | 7.6 | 7.5 | 7.55 |
| 162 | 144369-45-9  |  | 7.5 | 7.6 | 7.55 |

|     |              |                                                                                      |     |     |      |
|-----|--------------|--------------------------------------------------------------------------------------|-----|-----|------|
| 163 | ZINC68592313 | 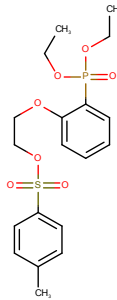    | 7.5 | 7.6 | 7.55 |
| 164 | 6915         |    | 7.5 | 7.6 | 7.55 |
| 165 | ZINC02284233 |   | 7.5 | 7.6 | 7.55 |
| 166 | 3205         |  | 7.5 | 7.6 | 7.55 |
| 167 | ZINC09128858 |   | 7.3 | 7.8 | 7.55 |

|     |              |                                                                                     |     |     |      |
|-----|--------------|-------------------------------------------------------------------------------------|-----|-----|------|
| 168 | SN00149096   | 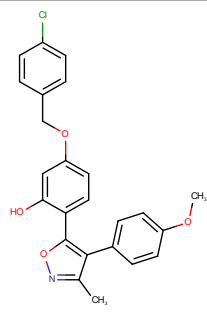   | 7.3 | 7.8 | 7.55 |
| 169 | ZINC08918384 |    | 7.7 | 7.3 | 7.5  |
| 170 | ZINC01322258 |  | 7.6 | 7.4 | 7.5  |
| 171 | ZINC72324469 |  | 7.6 | 7.4 | 7.5  |
| 172 | ZINC03846553 |  | 7.6 | 7.4 | 7.5  |

|     |              |                                                                                      |     |     |     |
|-----|--------------|--------------------------------------------------------------------------------------|-----|-----|-----|
| 173 | SN00278139   | 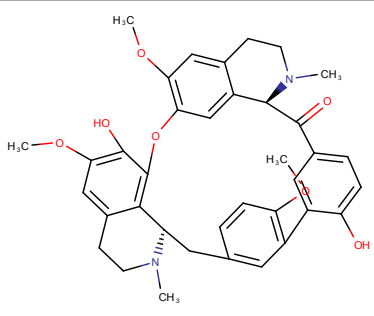    | 7.5 | 7.5 | 7.5 |
| 174 | ZINC48057026 |     | 7.5 | 7.5 | 7.5 |
| 175 | 467419-73-4  |   | 7.5 | 7.5 | 7.5 |
| 176 | SN00149688   |   | 7.5 | 7.5 | 7.5 |
| 177 | ZINC04171591 |  | 7.5 | 7.5 | 7.5 |



|     |              |                                                                                     |     |     |      |
|-----|--------------|-------------------------------------------------------------------------------------|-----|-----|------|
| 178 | ZINC02096175 | 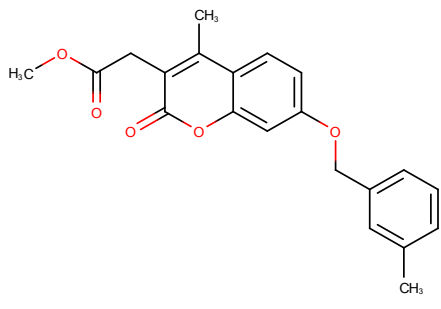  | 7.4 | 7.6 | 7.5  |
| 179 | ZINC01782009 |    | 7.3 | 7.7 | 7.5  |
| 180 | ZINC08994386 |   | 7.3 | 7.7 | 7.5  |
| 181 | ZINC06719437 |  | 7.3 | 7.7 | 7.5  |
| 182 | ZINC12865161 |  | 7.5 | 7.4 | 7.45 |

|     |              |                                                                                      |     |     |      |
|-----|--------------|--------------------------------------------------------------------------------------|-----|-----|------|
| 183 | ZINC01321752 | 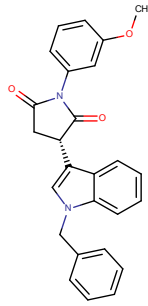    | 7.4 | 7.5 | 7.45 |
| 184 | ZINC09129980 |     | 7.4 | 7.5 | 7.45 |
| 185 | ZINC72325204 |   | 7.4 | 7.5 | 7.45 |
| 186 | SN00009552   |   | 7.4 | 7.5 | 7.45 |
| 187 | ZINC08764447 |  | 7.4 | 7.5 | 7.45 |

|     |                     |                                                                                     |     |     |      |
|-----|---------------------|-------------------------------------------------------------------------------------|-----|-----|------|
| 188 | ZINC03840748        | 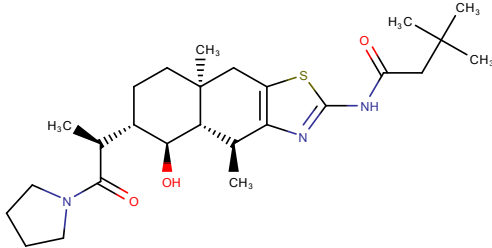  | 7.4 | 7.5 | 7.45 |
| 189 | MolPort-002-516-108 |   | 7.2 | 7.7 | 7.45 |
| 190 | SN00149009          |   | 7.2 | 7.7 | 7.45 |
| 191 | ZINC02148733        |  | 7.2 | 7.7 | 7.45 |
| 192 | ZINC01799152        |  | 7.2 | 7.7 | 7.45 |

|     |                     |                                                                                     |     |     |      |
|-----|---------------------|-------------------------------------------------------------------------------------|-----|-----|------|
| 193 | ZINC20591923        | 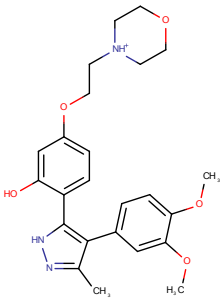   | 7.2 | 7.7 | 7.45 |
| 194 | ZINC08764397        |   | 7.6 | 7.3 | 7.45 |
| 195 | SN00149119          |   | 7.6 | 7.3 | 7.45 |
| 196 | MolPort-027-852-800 |  | 7.3 | 7.6 | 7.45 |
| 197 | MolPort-027-852-111 |  | 7.3 | 7.6 | 7.45 |

|     |              |                                                                                      |     |     |      |
|-----|--------------|--------------------------------------------------------------------------------------|-----|-----|------|
| 198 | ZINC20592055 | 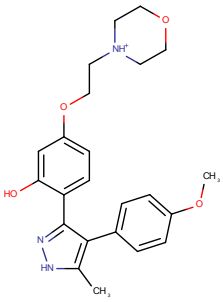    | 7.3 | 7.6 | 7.45 |
| 199 | ZINC04026460 |    | 7.1 | 7.8 | 7.45 |
| 200 | SN00245703   |    | 7.1 | 7.8 | 7.45 |
| 201 | ZINC01124363 |  | 7.5 | 7.3 | 7.4  |
| 202 | ZINC11867170 |   | 7.5 | 7.3 | 7.4  |

|     |                     |                                                                                      |     |     |     |
|-----|---------------------|--------------------------------------------------------------------------------------|-----|-----|-----|
| 203 | ZINC02401695        | 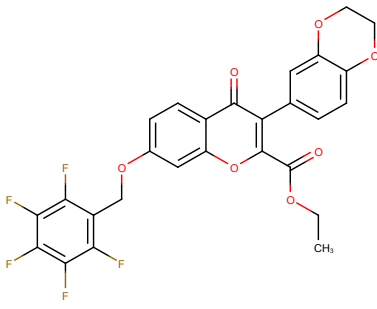    | 7.5 | 7.3 | 7.4 |
| 204 | ZINC13569111        |    | 7.5 | 7.3 | 7.4 |
| 205 | MolPort-002-514-023 |   | 7.4 | 7.4 | 7.4 |
| 206 | 141544-63-0         |   | 7.4 | 7.4 | 7.4 |
| 207 | ZINC04090560        |  | 7.4 | 7.4 | 7.4 |

|     |                     |                                                                                      |     |     |     |
|-----|---------------------|--------------------------------------------------------------------------------------|-----|-----|-----|
| 208 | ZINC17058595        | 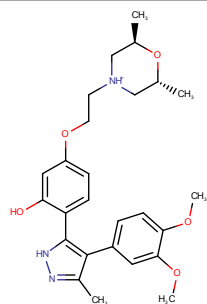    | 7.4 | 7.4 | 7.4 |
| 209 | MolPort-001-745-794 |    | 7.3 | 7.5 | 7.4 |
| 210 | ZINC12875010        |   | 7.3 | 7.5 | 7.4 |
| 211 | ZINC12865161        |   | 7.3 | 7.5 | 7.4 |
| 212 | MolPort-002-536-594 |  | 7.3 | 7.5 | 7.4 |

|     |              |                                                                                      |     |     |     |
|-----|--------------|--------------------------------------------------------------------------------------|-----|-----|-----|
| 213 | 20208        | 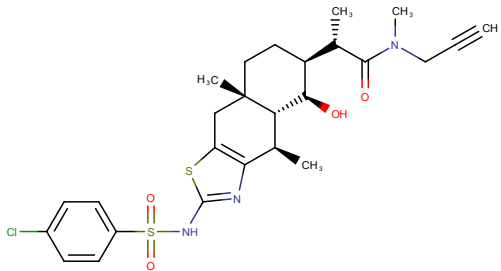   | 7.3 | 7.5 | 7.4 |
| 214 | ZINC02115645 |    | 7.3 | 7.5 | 7.4 |
| 215 | ZINC02149058 |   | 7.3 | 7.5 | 7.4 |
| 216 | ZINC09130539 |  | 7.2 | 7.6 | 7.4 |
| 217 | ZINC03150514 |  | 7.2 | 7.6 | 7.4 |



|     |                     |  |     |     |      |
|-----|---------------------|--|-----|-----|------|
| 218 | ZINC02359452        |  | 7.2 | 7.6 | 7.4  |
| 219 | ZINC01321303        |  | 7.5 | 7.2 | 7.35 |
| 220 | ZINC02094744        |  | 7.5 | 7.2 | 7.35 |
| 221 | ZINC08789240        |  | 7.4 | 7.3 | 7.35 |
| 222 | MolPort-042-647-983 |  | 7.4 | 7.3 | 7.35 |

|     |              |                                                                                      |     |     |      |
|-----|--------------|--------------------------------------------------------------------------------------|-----|-----|------|
| 223 | SN00359873   | 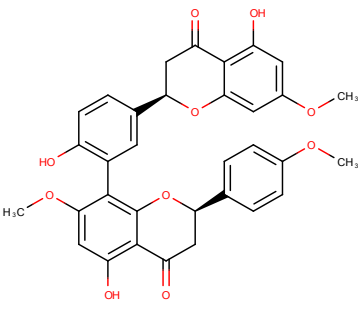    | 7.4 | 7.3 | 7.35 |
| 224 | ZINC20466656 |    | 7.4 | 7.3 | 7.35 |
| 225 | ZINC02417488 |   | 7.4 | 7.3 | 7.35 |
| 226 | ZINC02416730 |   | 7.4 | 7.3 | 7.35 |
| 227 | ZINC85879450 |  | 7.3 | 7.4 | 7.35 |

|     |              |                                                                                     |     |     |      |
|-----|--------------|-------------------------------------------------------------------------------------|-----|-----|------|
| 228 | ZINC02148395 | 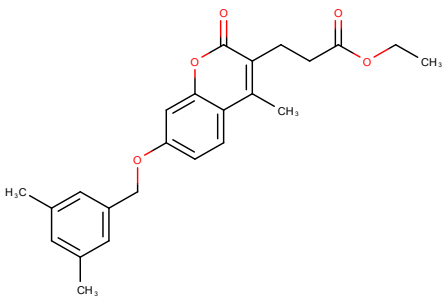  | 7.3 | 7.4 | 7.35 |
| 229 | ZINC08764768 |    | 7.3 | 7.4 | 7.35 |
| 230 | 121979-39-3  |  | 7.3 | 7.4 | 7.35 |
| 231 | ZINC70701314 |  | 7.3 | 7.4 | 7.35 |
| 232 | ZINC48057026 |  | 7.3 | 7.4 | 7.35 |

|     |              |                                                                                     |     |     |      |
|-----|--------------|-------------------------------------------------------------------------------------|-----|-----|------|
| 233 | ZINC03875039 | 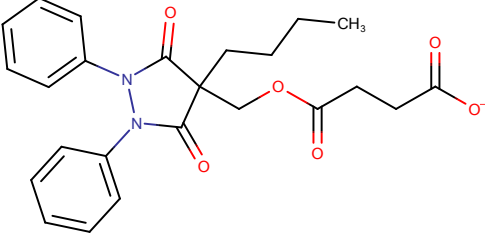  | 7.2 | 7.5 | 7.35 |
| 234 | ZINC02148180 |    | 7.2 | 7.5 | 7.35 |
| 235 | ZINC02419763 |  | 7.2 | 7.5 | 7.35 |
| 236 | ZINC02432591 |  | 7.1 | 7.6 | 7.35 |
| 237 | ZINC18068961 |  | 7.1 | 7.6 | 7.35 |

|     |                     |                                                                                      |     |     |      |
|-----|---------------------|--------------------------------------------------------------------------------------|-----|-----|------|
| 238 | ZINC01322844        | 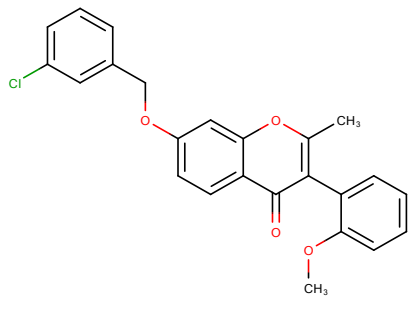    | 7   | 7.7 | 7.35 |
| 239 | ZINC12603405        |     | 7.4 | 7.2 | 7.3  |
| 240 | MolPort-010-738-591 |   | 7.4 | 7.2 | 7.3  |
| 241 | 114820-25-6         |  | 7.4 | 7.2 | 7.3  |
| 242 | ZINC00947089        |  | 7.4 | 7.2 | 7.3  |

|     |                     |                                                                                     |     |     |     |
|-----|---------------------|-------------------------------------------------------------------------------------|-----|-----|-----|
| 243 | SN00009667          | 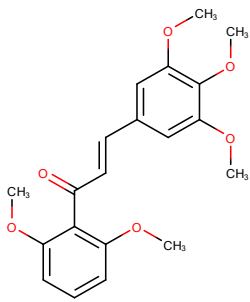   | 7.4 | 7.2 | 7.3 |
| 244 | ZINC12897517        |   | 7.4 | 7.2 | 7.3 |
| 245 | MolPort-038-386-307 |  | 7.2 | 7.4 | 7.3 |
| 246 | 105377-88-6         |  | 7.2 | 7.4 | 7.3 |
| 247 | ZINC05427801        |  | 7.2 | 7.4 | 7.3 |

|     |                     |                                                                                      |     |     |     |
|-----|---------------------|--------------------------------------------------------------------------------------|-----|-----|-----|
| 248 | ZINC02316868        | 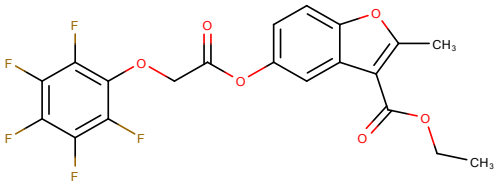   | 7.2 | 7.4 | 7.3 |
| 249 | MolPort-028-854-802 |     | 7.2 | 7.4 | 7.3 |
| 250 | MolPort-002-533-316 |   | 7.2 | 7.4 | 7.3 |
| 251 | SN00345792          |  | 7.2 | 7.4 | 7.3 |
| 252 | MolPort-002-518-869 |  | 7.2 | 7.4 | 7.3 |

|     |                     |                                                                                     |     |     |     |
|-----|---------------------|-------------------------------------------------------------------------------------|-----|-----|-----|
| 253 | ZINC01797720        | 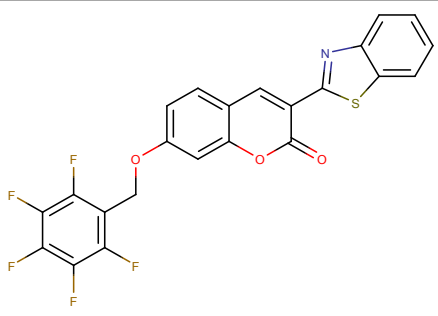  | 6.9 | 7.7 | 7.3 |
| 254 | MolPort-029-886-452 |    | 7.3 | 7.3 | 7.3 |
| 255 | ZINC79210340        |   | 7.3 | 7.3 | 7.3 |
| 256 | 9853                |  | 7.3 | 7.3 | 7.3 |
| 257 | ZINC68573697        |  | 7.3 | 7.3 | 7.3 |



|     |                     |                                                                                     |     |     |     |
|-----|---------------------|-------------------------------------------------------------------------------------|-----|-----|-----|
| 258 | MolPort-000-813-035 | 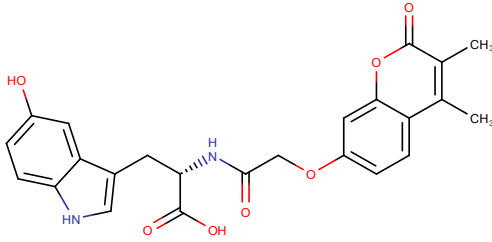  | 7.3 | 7.3 | 7.3 |
| 259 | MolPort-028-855-502 |    | 7.3 | 7.3 | 7.3 |
| 260 | ZINC12865161        |   | 7.3 | 7.3 | 7.3 |
| 261 | ZINC20622826        |  | 7.3 | 7.3 | 7.3 |
| 262 | ZINC17858262        |  | 7.3 | 7.3 | 7.3 |

|     |                     |                                                                                      |     |     |     |
|-----|---------------------|--------------------------------------------------------------------------------------|-----|-----|-----|
| 263 | ZINC02147827        | 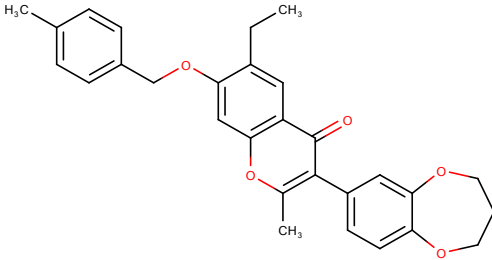   | 7.3 | 7.3 | 7.3 |
| 264 | SN00149094          |     | 7.3 | 7.3 | 7.3 |
| 265 | ZINC13124861        |    | 7.3 | 7.3 | 7.3 |
| 266 | MolPort-002-520-217 |  | 7.1 | 7.5 | 7.3 |
| 267 | MolPort-002-519-718 |  | 7.1 | 7.5 | 7.3 |

|     |              |                                                                                     |     |     |     |
|-----|--------------|-------------------------------------------------------------------------------------|-----|-----|-----|
| 268 | ZINC02115916 | 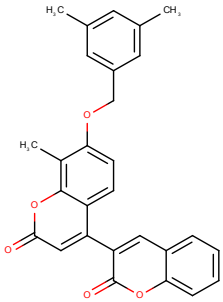   | 7.1 | 7.5 | 7.3 |
| 269 | ZINC06755178 |    | 7.1 | 7.5 | 7.3 |
| 270 | ZINC09130710 |   | 7.1 | 7.5 | 7.3 |
| 271 | SN00098390   |  | 7.1 | 7.5 | 7.3 |
| 272 | ZINC70692199 |  | 7.1 | 7.5 | 7.3 |

|     |                     |                                                                                      |     |     |      |
|-----|---------------------|--------------------------------------------------------------------------------------|-----|-----|------|
| 273 | MolPort-002-535-528 | 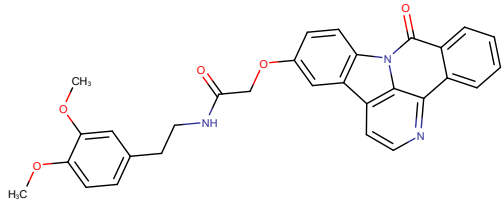   | 7   | 7.6 | 7.3  |
| 274 | SN00379562          |    | 7   | 7.6 | 7.3  |
| 275 | SN00351686          |    | 7.4 | 7.1 | 7.25 |
| 276 | SN00168965          |   | 7.4 | 7.1 | 7.25 |
| 277 | ZINC20466317        |  | 7.4 | 7.1 | 7.25 |

|     |                     |                                                                                      |     |     |      |
|-----|---------------------|--------------------------------------------------------------------------------------|-----|-----|------|
| 278 | ZINC02112486        | 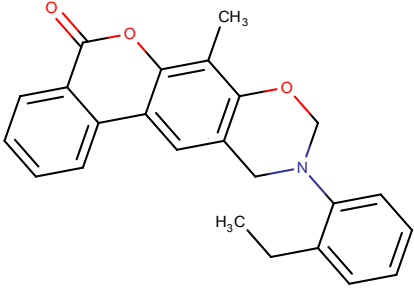   | 7.3 | 7.2 | 7.25 |
| 279 | 6895                |     | 7.3 | 7.2 | 7.25 |
| 280 | MolPort-029-885-299 |   | 7.3 | 7.2 | 7.25 |
| 281 | MolPort-002-536-261 |  | 7.3 | 7.2 | 7.25 |
| 282 | ZINC12296352        |  | 7.3 | 7.2 | 7.25 |

|     |                     |                                                                                     |     |     |      |
|-----|---------------------|-------------------------------------------------------------------------------------|-----|-----|------|
| 283 | MolPort-038-386-306 | 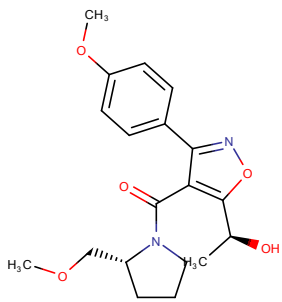   | 7.3 | 7.2 | 7.25 |
| 284 | ZINC13653587        |   | 7.2 | 7.3 | 7.25 |
| 285 | ZINC04061925        |   | 7.2 | 7.3 | 7.25 |
| 286 | MolPort-002-532-941 |  | 7.1 | 7.4 | 7.25 |
| 287 | ZINC08879630        |  | 7.1 | 7.4 | 7.25 |

|     |              |                                                                                      |     |     |      |
|-----|--------------|--------------------------------------------------------------------------------------|-----|-----|------|
| 288 | ZINC30879908 | 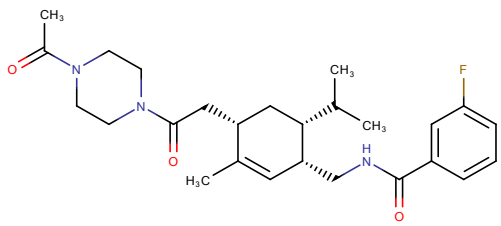   | 7.1 | 7.4 | 7.25 |
| 289 | ZINC03846576 |     | 7.1 | 7.4 | 7.25 |
| 290 | ZINC00083661 |   | 7.1 | 7.4 | 7.25 |
| 291 | ZINC02096181 |  | 6.8 | 7.7 | 7.25 |
| 292 | ZINC11867175 |  | 7.4 | 7   | 7.2  |

|     |                     |                                                                                      |     |     |     |
|-----|---------------------|--------------------------------------------------------------------------------------|-----|-----|-----|
| 293 | MolPort-028-855-910 | 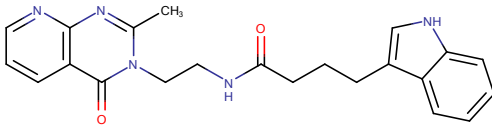   | 7.2 | 7.2 | 7.2 |
| 294 | ZINC02817963        |     | 7.2 | 7.2 | 7.2 |
| 295 | ZINC62001394        |    | 7.2 | 7.2 | 7.2 |
| 296 | ZINC02092024        |   | 7.2 | 7.2 | 7.2 |
| 297 | ZINC08791608        |  | 7.2 | 7.2 | 7.2 |



|     |                     |                                                                                      |     |     |     |
|-----|---------------------|--------------------------------------------------------------------------------------|-----|-----|-----|
| 298 | 8166                | 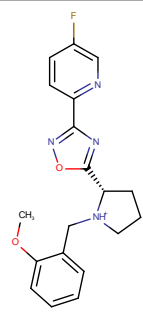    | 7.2 | 7.2 | 7.2 |
| 299 | ZINC02105206        |    | 7   | 7.4 | 7.2 |
| 300 | MolPort-005-910-295 |   | 7   | 7.4 | 7.2 |
| 301 | ZINC04025067        |  | 7   | 7.4 | 7.2 |
| 302 | ZINC09130732        |   | 7   | 7.4 | 7.2 |

|     |                     |                                                                                     |     |     |     |
|-----|---------------------|-------------------------------------------------------------------------------------|-----|-----|-----|
| 303 | ZINC02092577        | 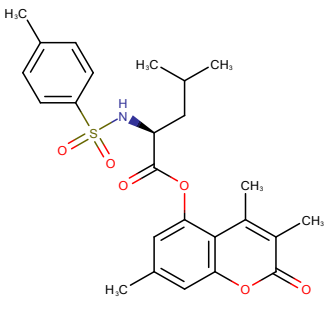   | 6.9 | 7.5 | 7.2 |
| 304 | SN00268509          |   | 6.9 | 7.5 | 7.2 |
| 305 | ZINC12603350        |   | 7.3 | 7.1 | 7.2 |
| 306 | ZINC30883993        |  | 7.3 | 7.1 | 7.2 |
| 307 | MolPort-001-742-517 |  | 7.3 | 7.1 | 7.2 |

|     |                     |                                                                                      |     |     |     |
|-----|---------------------|--------------------------------------------------------------------------------------|-----|-----|-----|
| 308 | ZINC02115467        | 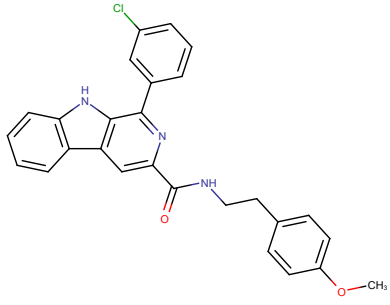    | 7.3 | 7.1 | 7.2 |
| 309 | MolPort-002-517-246 |     | 7.1 | 7.3 | 7.2 |
| 310 | ZINC02107236        |    | 7.1 | 7.3 | 7.2 |
| 311 | ZINC68601377        |  | 7.1 | 7.3 | 7.2 |
| 312 | ZINC70692423        |   | 7.1 | 7.3 | 7.2 |

|     |                     |                                                                                      |     |     |     |
|-----|---------------------|--------------------------------------------------------------------------------------|-----|-----|-----|
| 313 | MolPort-044-544-310 | 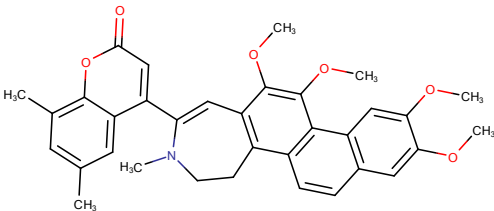   | 7.1 | 7.3 | 7.2 |
| 314 | ZINC04387787        |    | 7.1 | 7.3 | 7.2 |
| 315 | 1877                |   | 7.1 | 7.3 | 7.2 |
| 316 | ZINC08479128        |  | 7.1 | 7.3 | 7.2 |
| 317 | ZINC04100775        |  | 7.1 | 7.3 | 7.2 |

|     |              |                                                                                      |     |     |      |
|-----|--------------|--------------------------------------------------------------------------------------|-----|-----|------|
| 318 | ZINC01111774 | 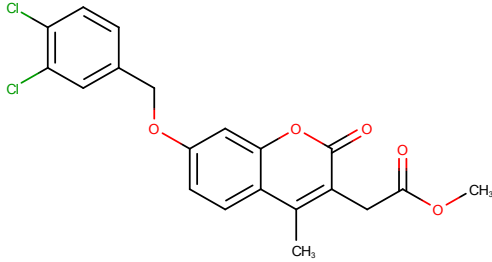   | 7.1 | 7.3 | 7.2  |
| 319 | ZINC01118985 |    | 7.1 | 7.3 | 7.2  |
| 320 | SN00063216   |   | 7.4 | 6.9 | 7.15 |
| 321 | ZINC02156156 |  | 7.4 | 6.9 | 7.15 |
| 322 | ZINC02091864 |  | 7.4 | 6.9 | 7.15 |

|     |                     |                                                                                      |     |     |      |
|-----|---------------------|--------------------------------------------------------------------------------------|-----|-----|------|
| 323 | MolPort-029-886-141 | 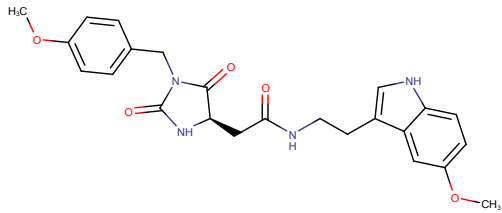   | 7.4 | 6.9 | 7.15 |
| 324 | ZINC35425888        |    | 7.3 | 7   | 7.15 |
| 325 | SN00155517          |   | 7.2 | 7.1 | 7.15 |
| 326 | ZINC20611253        |  | 7.2 | 7.1 | 7.15 |
| 327 | ZINC08764272        |  | 7.2 | 7.1 | 7.15 |

|     |              |                                                                                     |     |     |      |
|-----|--------------|-------------------------------------------------------------------------------------|-----|-----|------|
| 328 | ZINC03840780 | 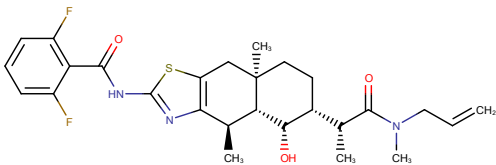  | 7.2 | 7.1 | 7.15 |
| 329 | ZINC04252739 |    | 7.2 | 7.1 | 7.15 |
| 330 | ZINC20757263 |  | 7.1 | 7.2 | 7.15 |
| 331 | SN00077518   |  | 7.1 | 7.2 | 7.15 |
| 332 | ZINC12891809 |  | 7.1 | 7.2 | 7.15 |

|     |              |  |     |     |      |
|-----|--------------|--|-----|-----|------|
| 333 | ZINC02094302 |  | 7.1 | 7.2 | 7.15 |
| 334 | ZINC70666401 |  | 7.1 | 7.2 | 7.15 |
| 335 | ZINC13127298 |  | 7   | 7.3 | 7.15 |
| 336 | ZINC79189085 |  | 7   | 7.3 | 7.15 |
| 337 | ZINC01111387 |  | 7   | 7.3 | 7.15 |



|     |                     |                                                                                     |     |     |      |
|-----|---------------------|-------------------------------------------------------------------------------------|-----|-----|------|
| 338 | ZINC02159445        | 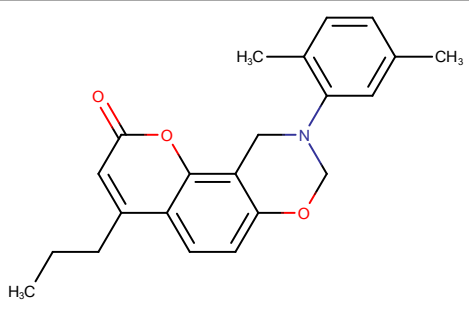  | 7   | 7.3 | 7.15 |
| 339 | MolPort-044-830-921 |    | 7   | 7.3 | 7.15 |
| 340 | ZINC70687971        |   | 7   | 7.3 | 7.15 |
| 341 | SN00151294          |  | 6.9 | 7.4 | 7.15 |
| 342 | MolPort-009-649-059 |  | 6.9 | 7.4 | 7.15 |

|     |              |                                                                                      |     |     |      |
|-----|--------------|--------------------------------------------------------------------------------------|-----|-----|------|
| 343 | ZINC01322799 | 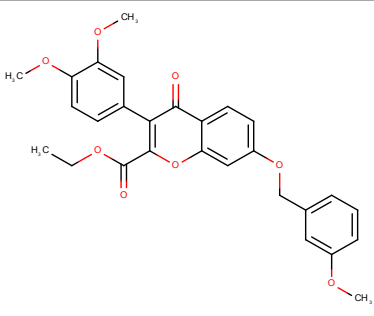    | 6.9 | 7.4 | 7.15 |
| 344 | ZINC12901891 |    | 6.9 | 7.4 | 7.15 |
| 345 | 12169        |   | 7.2 | 7   | 7.1  |
| 346 | ZINC02093820 |   | 7.2 | 7   | 7.1  |
| 347 | ZINC01447881 |  | 7.2 | 7   | 7.1  |

|     |                     |                                                                                      |     |     |     |
|-----|---------------------|--------------------------------------------------------------------------------------|-----|-----|-----|
| 348 | ZINC09266649        | 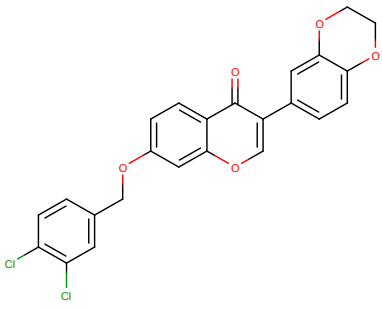    | 7.2 | 7   | 7.1 |
| 349 | ZINC12881699        |    | 7.1 | 7.1 | 7.1 |
| 350 | 78518-73-7          |   | 7.1 | 7.1 | 7.1 |
| 351 | ZINC20467354        |  | 7.1 | 7.1 | 7.1 |
| 352 | MolPort-028-855-487 |   | 7.1 | 7.1 | 7.1 |

|     |              |  |     |     |     |
|-----|--------------|--|-----|-----|-----|
| 353 | ZINC04252699 |  | 7.1 | 7.1 | 7.1 |
| 354 | ZINC01797677 |  | 7.1 | 7.1 | 7.1 |
| 355 | ZINC02122276 |  | 7   | 7.2 | 7.1 |
| 356 | ZINC08993442 |  | 6.9 | 7.3 | 7.1 |
| 357 | SN00151259   |  | 6.9 | 7.3 | 7.1 |

|     |              |  |     |     |      |
|-----|--------------|--|-----|-----|------|
| 358 | ZINC02122006 |  | 6.9 | 7.3 | 7.1  |
| 359 | ZINC08739938 |  | 6.9 | 7.3 | 7.1  |
| 360 | ZINC02149345 |  | 6.8 | 7.4 | 7.1  |
| 361 | ZINC20111812 |  | 7.2 | 6.9 | 7.05 |
| 362 | 20391        |  | 7.2 | 6.9 | 7.05 |

|     |                     |                                                                                      |     |     |      |
|-----|---------------------|--------------------------------------------------------------------------------------|-----|-----|------|
| 363 | ZINC15674342        | 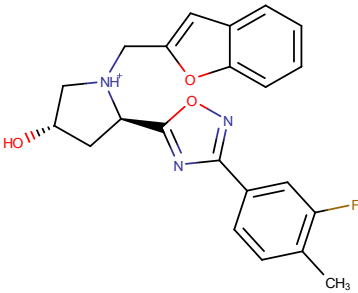    | 7.2 | 6.9 | 7.05 |
| 364 | MolPort-001-910-598 |     | 6.9 | 7.2 | 7.05 |
| 365 | MolPort-002-525-441 |   | 6.9 | 7.2 | 7.05 |
| 366 | MolPort-001-838-316 |   | 6.9 | 7.2 | 7.05 |
| 367 | ZINC01448111        |  | 6.9 | 7.2 | 7.05 |

|     |              |                                                                                      |     |     |      |
|-----|--------------|--------------------------------------------------------------------------------------|-----|-----|------|
| 368 | 19304        | 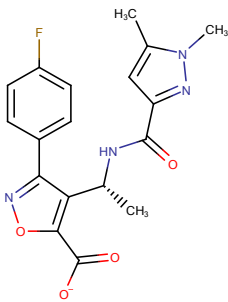    | 6.7 | 7.4 | 7.05 |
| 369 | 169340-01-6  |    | 6.7 | 7.4 | 7.05 |
| 370 | ZINC30883259 |    | 7.3 | 6.8 | 7.05 |
| 371 | ZINC85874833 |  | 7.1 | 7   | 7.05 |
| 372 | ZINC02341762 |   | 7.1 | 7   | 7.05 |

|     |                     |                                                                                      |     |     |      |
|-----|---------------------|--------------------------------------------------------------------------------------|-----|-----|------|
| 373 | ZINC05646268        | 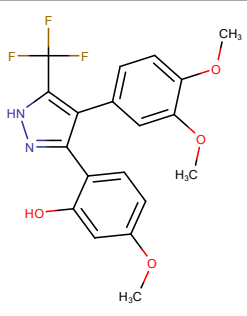    | 7.1 | 7   | 7.05 |
| 374 | MolPort-002-525-094 |     | 7.1 | 7   | 7.05 |
| 375 | SN00142352          |   | 7.1 | 7   | 7.05 |
| 376 | SN00309254          |  | 7   | 7.1 | 7.05 |
| 377 | ZINC08991161        |  | 7   | 7.1 | 7.05 |



|     |              |                                                                                      |     |     |      |
|-----|--------------|--------------------------------------------------------------------------------------|-----|-----|------|
| 378 | ZINC09129150 | 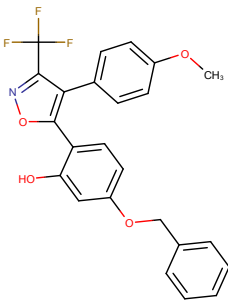    | 7   | 7.1 | 7.05 |
| 379 | SN00265756   |    | 7   | 7.1 | 7.05 |
| 380 | SN00379562   |   | 7   | 7.1 | 7.05 |
| 381 | ZINC01463420 |  | 7   | 7.1 | 7.05 |
| 382 | ZINC03846558 |  | 6.8 | 7.3 | 7.05 |

|     |                     |                                                                                      |     |     |      |
|-----|---------------------|--------------------------------------------------------------------------------------|-----|-----|------|
| 383 | ZINC20611343        | 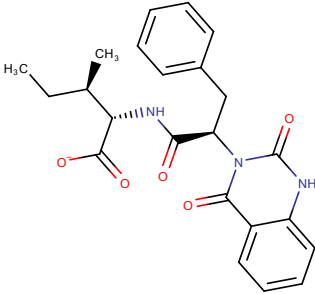    | 6.8 | 7.3 | 7.05 |
| 384 | 6277-14-1           |    | 6.8 | 7.3 | 7.05 |
| 385 | MolPort-000-852-534 |    | 7.2 | 6.8 | 7    |
| 386 | ZINC08790706        |  | 7.1 | 6.9 | 7    |
| 387 | ZINC03999931        |   | 7.1 | 6.9 | 7    |

|     |                     |  |   |   |   |
|-----|---------------------|--|---|---|---|
| 388 | 163597-60-2         |  | 7 | 7 | 7 |
| 389 | MolPort-002-536-237 |  | 7 | 7 | 7 |
| 390 | SN00083390          |  | 7 | 7 | 7 |
| 391 | 23212               |  | 7 | 7 | 7 |
| 392 | ZINC02401244        |  | 7 | 7 | 7 |

|     |                     |                                                                                      |     |     |   |
|-----|---------------------|--------------------------------------------------------------------------------------|-----|-----|---|
| 393 | ZINC12660555        | 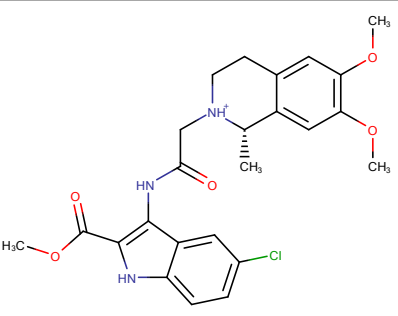    | 7   | 7   | 7 |
| 394 | MolPort-002-509-346 |     | 6.9 | 7.1 | 7 |
| 395 | ZINC05646116        |    | 6.9 | 7.1 | 7 |
| 396 | ZINC02094353        |  | 6.9 | 7.1 | 7 |
| 397 | ZINC03846618        |  | 6.9 | 7.1 | 7 |

|     |              |  |     |     |   |
|-----|--------------|--|-----|-----|---|
| 398 | ZINC09129706 |  | 6.9 | 7.1 | 7 |
| 399 | ZINC20113162 |  | 6.9 | 7.1 | 7 |
| 400 | ZINC02119961 |  | 6.9 | 7.1 | 7 |
| 401 | ZINC06662659 |  | 6.8 | 7.2 | 7 |
| 402 | ZINC00129480 |  | 6.8 | 7.2 | 7 |

|     |                     |                                                                                     |     |     |   |
|-----|---------------------|-------------------------------------------------------------------------------------|-----|-----|---|
| 403 | ZINC02283570        | 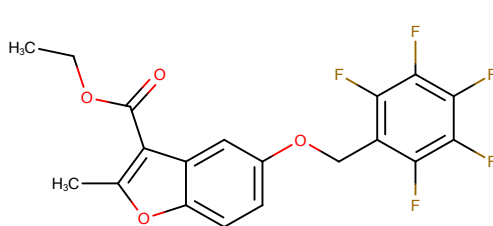  | 6.8 | 7.2 | 7 |
| 404 | MolPort-039-195-602 |    | 6.8 | 7.2 | 7 |
| 405 | ZINC05484338        |   | 6.8 | 7.2 | 7 |
| 406 | ZINC06669439        |  | 6.7 | 7.3 | 7 |
| 407 | 19317               |  | 6.7 | 7.3 | 7 |

|     |              |                                                                                      |     |     |      |
|-----|--------------|--------------------------------------------------------------------------------------|-----|-----|------|
| 408 | ZINC68591815 | 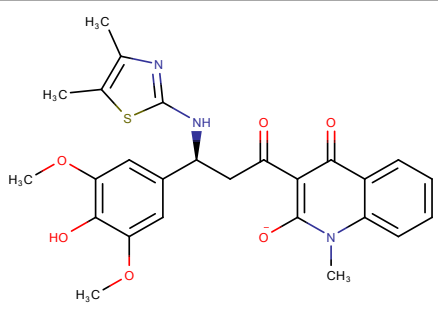   | 6.7 | 7.3 | 7    |
| 409 | 6883         |     | 7.2 | 6.7 | 6.95 |
| 410 | ZINC70687765 |    | 7   | 6.9 | 6.95 |
| 411 | ZINC02112065 |  | 7   | 6.9 | 6.95 |
| 412 | ZINC02111331 |  | 7   | 6.9 | 6.95 |

|     |                     |                                                                                     |     |     |      |
|-----|---------------------|-------------------------------------------------------------------------------------|-----|-----|------|
| 413 | 12308               | 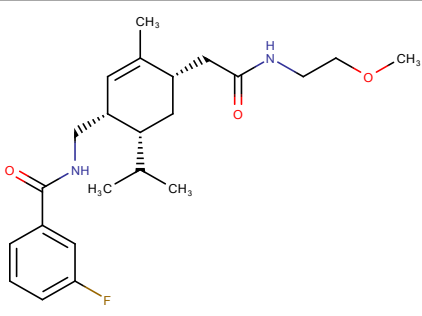  | 7   | 6.9 | 6.95 |
| 414 | 149355-76-0         |    | 7   | 6.9 | 6.95 |
| 415 | SN00309240          |  | 6.9 | 7   | 6.95 |
| 416 | MolPort-001-626-086 |  | 6.9 | 7   | 6.95 |
| 417 | ZINC01321302        |  | 6.9 | 7   | 6.95 |



|     |                     |  |     |     |      |
|-----|---------------------|--|-----|-----|------|
| 418 | ZINC16364038        |  | 6.9 | 7   | 6.95 |
| 419 | ZINC04278011        |  | 6.9 | 7   | 6.95 |
| 420 | MolPort-044-180-963 |  | 6.9 | 7   | 6.95 |
| 421 | ZINC01280062        |  | 6.9 | 7   | 6.95 |
| 422 | ZINC18166941        |  | 6.7 | 7.2 | 6.95 |

|     |                     |                                                                                      |     |     |      |
|-----|---------------------|--------------------------------------------------------------------------------------|-----|-----|------|
| 423 | SN00353994          | 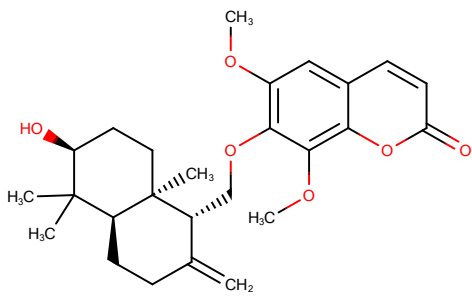   | 6.7 | 7.2 | 6.95 |
| 424 | 15714               |    | 6.7 | 7.2 | 6.95 |
| 425 | MolPort-035-701-757 |    | 6.7 | 7.2 | 6.95 |
| 426 | ZINC04045543        |  | 6.5 | 7.4 | 6.95 |
| 427 | MolPort-035-701-683 |   | 6.8 | 7.1 | 6.95 |

|     |              |                                                                                      |     |     |      |
|-----|--------------|--------------------------------------------------------------------------------------|-----|-----|------|
| 428 | ZINC09423424 | 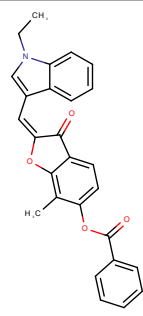    | 6.8 | 7.1 | 6.95 |
| 429 | SN00073713   |     | 6.8 | 7.1 | 6.95 |
| 430 | ZINC02281027 |   | 6.8 | 7.1 | 6.95 |
| 431 | ZINC01663395 |   | 6.8 | 7.1 | 6.95 |
| 432 | ZINC01463853 |  | 6.8 | 7.1 | 6.95 |

|     |                     |  |     |     |      |
|-----|---------------------|--|-----|-----|------|
| 433 | SN00173499          |  | 6.8 | 7.1 | 6.95 |
| 434 | MolPort-000-823-233 |  | 6.6 | 7.3 | 6.95 |
| 435 | ZINC01940964        |  | 6.6 | 7.3 | 6.95 |
| 436 | MolPort-002-532-272 |  | 7.1 | 6.7 | 6.9  |
| 437 | MolPort-001-737-843 |  | 7.1 | 6.7 | 6.9  |

|     |                     |                                                                                      |     |     |     |
|-----|---------------------|--------------------------------------------------------------------------------------|-----|-----|-----|
| 438 | 15331               | 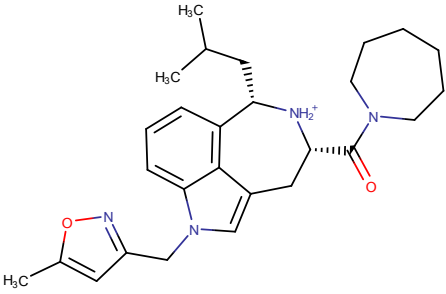   | 7.1 | 6.7 | 6.9 |
| 439 | MolPort-008-348-482 |    | 7.1 | 6.7 | 6.9 |
| 440 | 13183               |   | 7   | 6.8 | 6.9 |
| 441 | ZINC68572030        |   | 7   | 6.8 | 6.9 |
| 442 | ZINC00945051        |  | 7   | 6.8 | 6.9 |

|     |                     |                                                                                     |     |     |     |
|-----|---------------------|-------------------------------------------------------------------------------------|-----|-----|-----|
| 443 | 189083-79-2         | 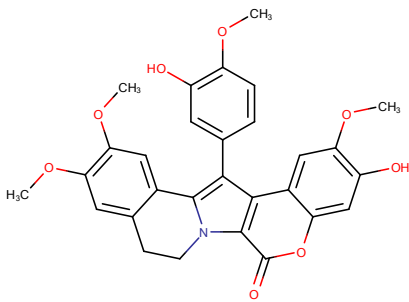   | 7   | 6.8 | 6.9 |
| 444 | ZINC49543314        |    | 6.9 | 6.9 | 6.9 |
| 445 | ZINC62001460        |  | 6.9 | 6.9 | 6.9 |
| 446 | MolPort-002-675-581 |  | 6.9 | 6.9 | 6.9 |
| 447 | ZINC70701314        |  | 6.9 | 6.9 | 6.9 |

|     |              |                                                                                      |     |     |     |
|-----|--------------|--------------------------------------------------------------------------------------|-----|-----|-----|
| 448 | ZINC02289379 | 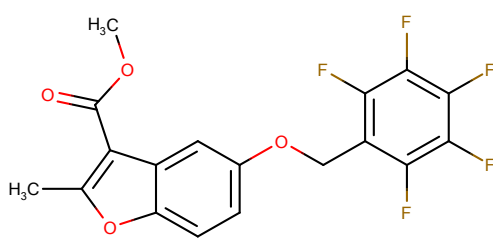   | 6.9 | 6.9 | 6.9 |
| 449 | ZINC00323509 |    | 6.9 | 6.9 | 6.9 |
| 450 | ZINC02433600 |    | 6.9 | 6.9 | 6.9 |
| 451 | 115982-19-9  |   | 6.9 | 6.9 | 6.9 |
| 452 | ZINC02118774 |  | 6.9 | 6.9 | 6.9 |

|     |                     |                                                                                     |     |     |     |
|-----|---------------------|-------------------------------------------------------------------------------------|-----|-----|-----|
| 453 | 131917-09-4         | 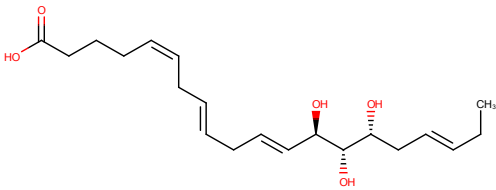  | 6.8 | 7   | 6.9 |
| 454 | ZINC09409633        |    | 6.8 | 7   | 6.9 |
| 455 | MolPort-002-516-123 |  | 6.8 | 7   | 6.9 |
| 456 | ZINC40312612        |  | 6.7 | 7.1 | 6.9 |
| 457 | ZINC11867078        |  | 6.7 | 7.1 | 6.9 |



|     |                     |                                                                                      |     |     |      |
|-----|---------------------|--------------------------------------------------------------------------------------|-----|-----|------|
| 458 | ZINC02125245        | 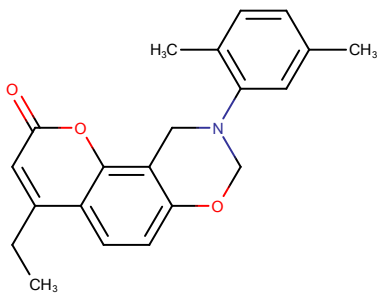    | 6.7 | 7.1 | 6.9  |
| 459 | MolPort-023-275-183 |     | 6.6 | 7.2 | 6.9  |
| 460 | ZINC02091635        |   | 7.1 | 6.6 | 6.85 |
| 461 | ZINC01799114        |  | 7.1 | 6.6 | 6.85 |
| 462 | MolPort-009-759-056 |  | 6.9 | 6.8 | 6.85 |

|     |                     |                                                                                      |     |     |      |
|-----|---------------------|--------------------------------------------------------------------------------------|-----|-----|------|
| 463 | ZINC04222564        | 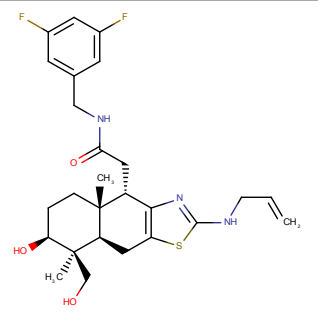    | 6.9 | 6.8 | 6.85 |
| 464 | MolPort-002-522-484 |    | 6.9 | 6.8 | 6.85 |
| 465 | SN00267894          |    | 6.9 | 6.8 | 6.85 |
| 466 | ZINC08791835        |  | 6.9 | 6.8 | 6.85 |
| 467 | ZINC20466689        |  | 6.9 | 6.8 | 6.85 |

|     |              |                                                                                      |     |     |      |
|-----|--------------|--------------------------------------------------------------------------------------|-----|-----|------|
| 468 | SN00073847   | 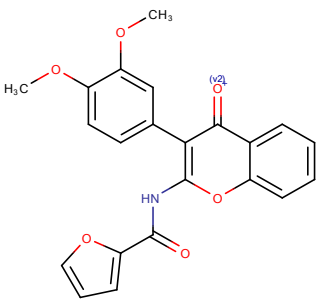    | 6.9 | 6.8 | 6.85 |
| 469 | ZINC38564389 |    | 6.8 | 6.9 | 6.85 |
| 470 | 7338         |   | 6.8 | 6.9 | 6.85 |
| 471 | ZINC02150013 |  | 6.8 | 6.9 | 6.85 |
| 472 | ZINC20411593 |   | 6.8 | 6.9 | 6.85 |

|     |                     |                                                                                      |     |     |      |
|-----|---------------------|--------------------------------------------------------------------------------------|-----|-----|------|
| 473 | MolPort-007-673-275 | 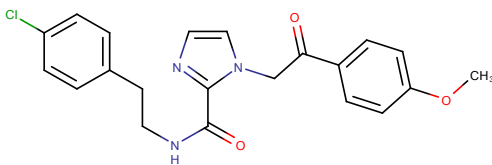   | 6.8 | 6.9 | 6.85 |
| 474 | ZINC01648045        |    | 6.8 | 6.9 | 6.85 |
| 475 | ZINC02442084        |    | 6.8 | 6.9 | 6.85 |
| 476 | 6277                |   | 6.7 | 7   | 6.85 |
| 477 | ZINC13729784        |  | 6.7 | 7   | 6.85 |

|     |                     |                                                                                     |     |   |      |
|-----|---------------------|-------------------------------------------------------------------------------------|-----|---|------|
| 478 | MolPort-028-856-572 | 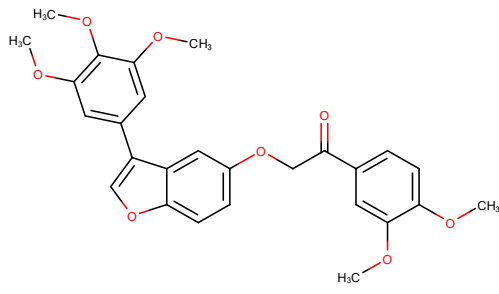  | 6.7 | 7 | 6.85 |
| 479 | ZINC18046579        |   | 6.7 | 7 | 6.85 |
| 480 | SN00147976          |   | 6.7 | 7 | 6.85 |
| 481 | SN00283805          |  | 6.7 | 7 | 6.85 |
| 482 | 163768-83-0         |  | 6.7 | 7 | 6.85 |

|     |              |                                                                                     |     |     |      |
|-----|--------------|-------------------------------------------------------------------------------------|-----|-----|------|
| 483 | ZINC40309002 | 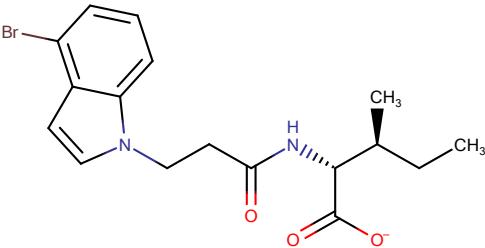  | 6.7 | 7   | 6.85 |
| 484 | SN00084157   |    | 6.7 | 7   | 6.85 |
| 485 | ZINC02092165 |  | 6.6 | 7.1 | 6.85 |
| 486 | ZINC02151660 |  | 6.5 | 7.2 | 6.85 |
| 487 | ZINC06407719 |  | 6.7 | 6.9 | 6.8  |

|     |                     |                                                                                     |     |     |     |
|-----|---------------------|-------------------------------------------------------------------------------------|-----|-----|-----|
| 488 | ZINC31157673        | 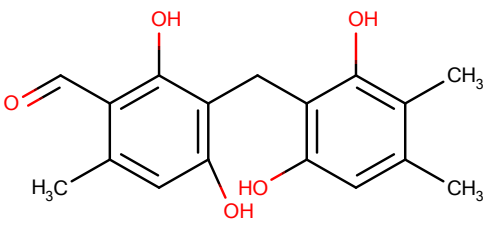  | 6.7 | 6.9 | 6.8 |
| 489 | MolPort-005-950-245 |    | 6.7 | 6.9 | 6.8 |
| 490 | SN00145601          |  | 6.7 | 6.9 | 6.8 |
| 491 | ZINC40313355        |  | 6.7 | 6.9 | 6.8 |
| 492 | ZINC11866426        |  | 6.7 | 6.9 | 6.8 |

|     |                     |  |     |     |     |
|-----|---------------------|--|-----|-----|-----|
| 493 | MolPort-002-535-447 |  | 6.7 | 6.9 | 6.8 |
| 494 | ZINC02319078        |  | 6.7 | 6.9 | 6.8 |
| 495 | ZINC09410228        |  | 6.7 | 6.9 | 6.8 |
| 496 | ZINC15674316        |  | 6.8 | 6.8 | 6.8 |
| 497 | ZINC02122012        |  | 6.8 | 6.8 | 6.8 |



|     |              |  |     |     |     |
|-----|--------------|--|-----|-----|-----|
| 498 | ZINC08740407 |  | 6.8 | 6.8 | 6.8 |
| 499 | SN00147906   |  | 6.6 | 7   | 6.8 |
| 500 | ZINC03846578 |  | 6.6 | 7   | 6.8 |
| 501 | SN00290874   |  | 6.6 | 7   | 6.8 |
| 502 | ZINC02126974 |  | 6.6 | 7   | 6.8 |

|     |                     |                                                                                      |     |     |     |
|-----|---------------------|--------------------------------------------------------------------------------------|-----|-----|-----|
| 503 | ZINC05389290        | 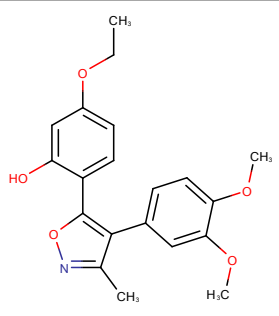    | 6.5 | 7.1 | 6.8 |
| 504 | MolPort-002-535-319 |    | 6.5 | 7.1 | 6.8 |
| 505 | ZINC35466154        |   | 6.5 | 7.1 | 6.8 |
| 506 | ZINC31164529        |  | 6.5 | 7.1 | 6.8 |
| 507 | MolPort-005-948-910 |   | 6.5 | 7.1 | 6.8 |

|     |                     |                                                                                      |     |     |      |
|-----|---------------------|--------------------------------------------------------------------------------------|-----|-----|------|
| 508 | ZINC13623573        | 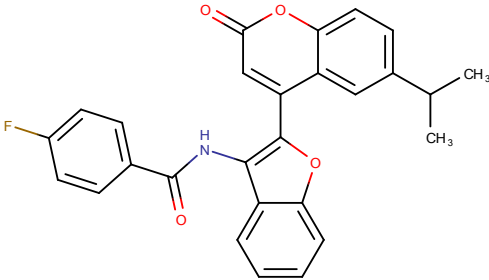   | 6.9 | 6.6 | 6.75 |
| 509 | MolPort-002-526-623 |     | 6.9 | 6.6 | 6.75 |
| 510 | ZINC02200212        |    | 6.9 | 6.6 | 6.75 |
| 511 | ZINC01799112        |   | 6.9 | 6.6 | 6.75 |
| 512 | ZINC02153244        |  | 6.8 | 6.7 | 6.75 |

|     |                     |                                                                                      |     |     |      |
|-----|---------------------|--------------------------------------------------------------------------------------|-----|-----|------|
| 513 | SN00017085          | 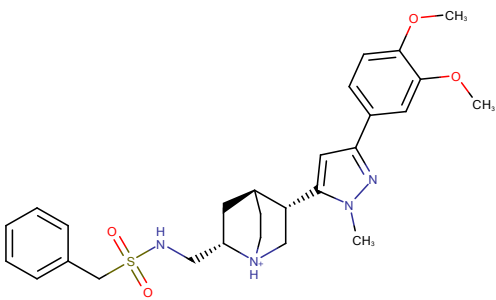   | 6.8 | 6.7 | 6.75 |
| 514 | MolPort-009-649-082 |     | 6.8 | 6.7 | 6.75 |
| 515 | MolPort-002-516-371 |    | 6.7 | 6.8 | 6.75 |
| 516 | ZINC04237030        |  | 6.7 | 6.8 | 6.75 |
| 517 | ZINC15676415        |   | 6.7 | 6.8 | 6.75 |

|     |              |                                                                                      |     |     |      |
|-----|--------------|--------------------------------------------------------------------------------------|-----|-----|------|
| 518 | ZINC02118808 | 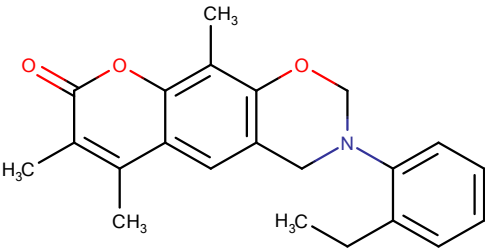   | 6.7 | 6.8 | 6.75 |
| 519 | ZINC01799111 |    | 6.7 | 6.8 | 6.75 |
| 520 | SN00332856   |   | 6.7 | 6.8 | 6.75 |
| 521 | ZINC02667598 |  | 6.7 | 6.8 | 6.75 |
| 522 | ZINC12860017 |  | 6.7 | 6.8 | 6.75 |

|     |              |                                                                                      |     |     |      |
|-----|--------------|--------------------------------------------------------------------------------------|-----|-----|------|
| 523 | 20464        | 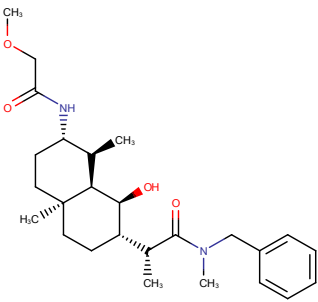    | 6.6 | 6.9 | 6.75 |
| 524 | ZINC68575016 |     | 6.6 | 6.9 | 6.75 |
| 525 | ZINC68574667 |    | 6.6 | 6.9 | 6.75 |
| 526 | SN00148474   |   | 6.6 | 6.9 | 6.75 |
| 527 | ZINC04270713 |  | 6.6 | 6.9 | 6.75 |

|     |                     |                                                                                     |     |     |      |
|-----|---------------------|-------------------------------------------------------------------------------------|-----|-----|------|
| 528 | ZINC70707164        | 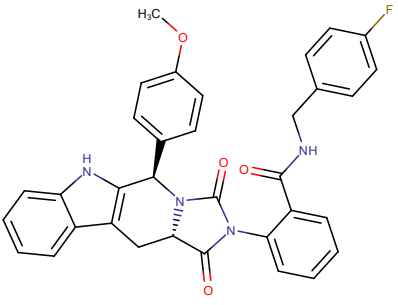   | 6.6 | 6.9 | 6.75 |
| 529 | ZINC68589892        |    | 6.6 | 6.9 | 6.75 |
| 530 | MolPort-044-810-768 |   | 6.6 | 6.9 | 6.75 |
| 531 | 19205               |  | 6.5 | 7   | 6.75 |
| 532 | ZINC04222564        |  | 6.5 | 7   | 6.75 |

|     |                     |                                                                                      |     |     |      |
|-----|---------------------|--------------------------------------------------------------------------------------|-----|-----|------|
| 533 | MolPort-035-700-267 | 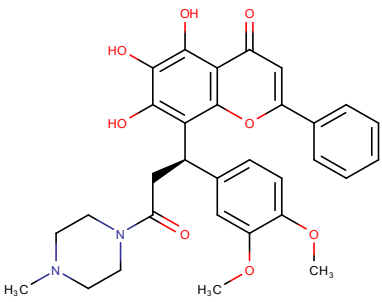    | 6.5 | 7   | 6.75 |
| 534 | MolPort-002-511-055 |     | 6.5 | 7   | 6.75 |
| 535 | ZINC02135653        |    | 6.5 | 7   | 6.75 |
| 536 | MolPort-000-487-182 |  | 6.4 | 7.1 | 6.75 |
| 537 | MolPort-028-856-091 |   | 6.9 | 6.5 | 6.7  |



|     |                     |                                                                                     |     |     |     |
|-----|---------------------|-------------------------------------------------------------------------------------|-----|-----|-----|
| 538 | ZINC02666313        | 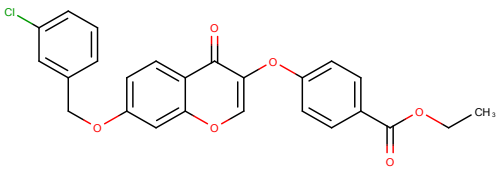  | 6.9 | 6.5 | 6.7 |
| 539 | MolPort-035-700-717 |   | 6.7 | 6.7 | 6.7 |
| 540 | MolPort-002-528-533 |  | 6.7 | 6.7 | 6.7 |
| 541 | MolPort-035-699-980 |  | 6.7 | 6.7 | 6.7 |
| 542 | MolPort-021-746-036 |  | 6.7 | 6.7 | 6.7 |

|     |                     |                                                                                     |     |     |     |
|-----|---------------------|-------------------------------------------------------------------------------------|-----|-----|-----|
| 543 | SN00075071          | 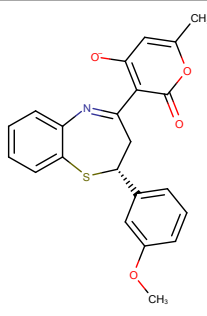   | 6.5 | 6.9 | 6.7 |
| 544 | ZINC05163437        |    | 6.5 | 6.9 | 6.7 |
| 545 | MolPort-028-856-192 |  | 6.5 | 6.9 | 6.7 |
| 546 | 18636               |  | 6.5 | 6.9 | 6.7 |
| 547 | MolPort-044-811-170 |  | 6.5 | 6.9 | 6.7 |

|     |              |                                                                                     |     |     |     |
|-----|--------------|-------------------------------------------------------------------------------------|-----|-----|-----|
| 548 | 200936-84-1  | 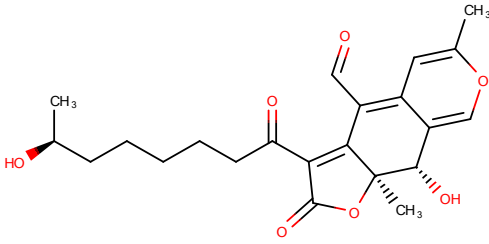  | 6.4 | 7   | 6.7 |
| 549 | SN00306304   |   | 6.4 | 7   | 6.7 |
| 550 | ZINC02122747 |  | 6.4 | 7   | 6.7 |
| 551 | ZINC04267149 |  | 6.4 | 7   | 6.7 |
| 552 | ZINC08918342 |  | 6.8 | 6.6 | 6.7 |

|     |                     |                                                                                      |     |     |     |
|-----|---------------------|--------------------------------------------------------------------------------------|-----|-----|-----|
| 553 | ZINC02146856        | 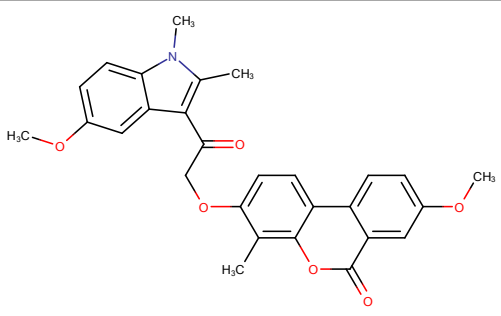   | 6.8 | 6.6 | 6.7 |
| 554 | MolPort-000-846-216 |    | 6.8 | 6.6 | 6.7 |
| 555 | ZINC02094262        |   | 6.8 | 6.6 | 6.7 |
| 556 | MolPort-002-518-378 |  | 6.6 | 6.8 | 6.7 |
| 557 | ZINC09033642        |  | 6.6 | 6.8 | 6.7 |

|     |                     |                                                                                      |     |     |     |
|-----|---------------------|--------------------------------------------------------------------------------------|-----|-----|-----|
| 558 | MolPort-002-524-112 | 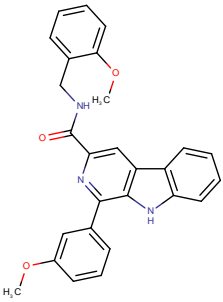    | 6.6 | 6.8 | 6.7 |
| 559 | ZINC06755168        |     | 6.6 | 6.8 | 6.7 |
| 560 | ZINC20467205        |   | 6.6 | 6.8 | 6.7 |
| 561 | ZINC00487450        |  | 6.6 | 6.8 | 6.7 |
| 562 | MolPort-035-701-927 |   | 6.6 | 6.8 | 6.7 |

|     |              |                                                                                      |     |     |      |
|-----|--------------|--------------------------------------------------------------------------------------|-----|-----|------|
| 563 | ZINC11865237 | 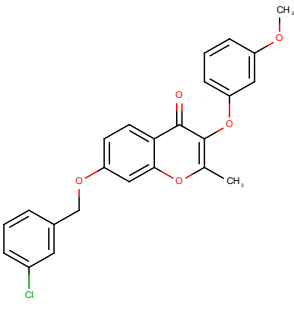    | 6.6 | 6.8 | 6.7  |
| 564 | ZINC03851657 |     | 6.6 | 6.8 | 6.7  |
| 565 | 149355-75-9  |    | 6.6 | 6.8 | 6.7  |
| 566 | ZINC12892682 |  | 6.9 | 6.4 | 6.65 |
| 567 | ZINC02149868 |  | 6.8 | 6.5 | 6.65 |

|     |                     |                                                                                      |     |     |      |
|-----|---------------------|--------------------------------------------------------------------------------------|-----|-----|------|
| 568 | ZINC13609475        | 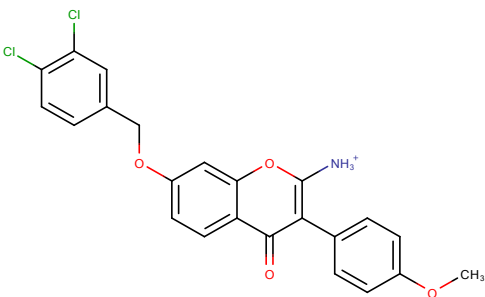   | 6.8 | 6.5 | 6.65 |
| 569 | SN00241623          |     | 6.7 | 6.6 | 6.65 |
| 570 | SN00101930          |   | 6.7 | 6.6 | 6.65 |
| 571 | MolPort-028-856-171 |   | 6.7 | 6.6 | 6.65 |
| 572 | ZINC02667544        |  | 6.7 | 6.6 | 6.65 |

|     |                     |                                                                                     |     |     |      |
|-----|---------------------|-------------------------------------------------------------------------------------|-----|-----|------|
| 573 | ZINC02217015        | 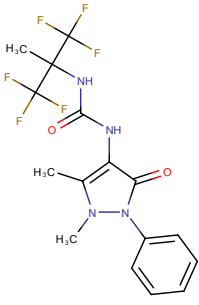   | 6.7 | 6.6 | 6.65 |
| 574 | ZINC12603403        |    | 6.6 | 6.7 | 6.65 |
| 575 | ZINC02152082        |  | 6.6 | 6.7 | 6.65 |
| 576 | ZINC03846418        |  | 6.6 | 6.7 | 6.65 |
| 577 | MolPort-002-518-659 |  | 6.6 | 6.7 | 6.65 |



|     |                     |                                                                                     |     |     |      |
|-----|---------------------|-------------------------------------------------------------------------------------|-----|-----|------|
| 578 | 143682-17-1         | 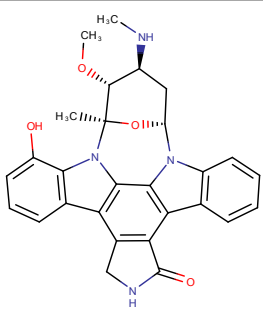   | 6.5 | 6.8 | 6.65 |
| 579 | ZINC20728784        |    | 6.5 | 6.8 | 6.65 |
| 580 | ZINC04023868        |   | 6.5 | 6.8 | 6.65 |
| 581 | SN00052039          |  | 6.5 | 6.8 | 6.65 |
| 582 | MolPort-002-518-297 |  | 6.5 | 6.8 | 6.65 |

|     |                     |                                                                                     |     |     |      |
|-----|---------------------|-------------------------------------------------------------------------------------|-----|-----|------|
| 583 | 121819-68-9         | 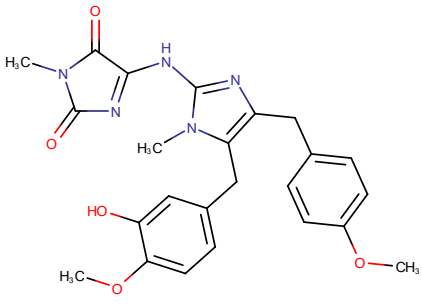  | 6.4 | 6.9 | 6.65 |
| 584 | SN00074949          |    | 6.4 | 6.9 | 6.65 |
| 585 | SN00049419          |   | 6.4 | 6.9 | 6.65 |
| 586 | MolPort-002-533-130 |  | 6.3 | 7   | 6.65 |
| 587 | ZINC11867349        |  | 6.7 | 6.5 | 6.6  |

|     |                     |                                                                                     |     |     |     |
|-----|---------------------|-------------------------------------------------------------------------------------|-----|-----|-----|
| 588 | ZINC11867170        | 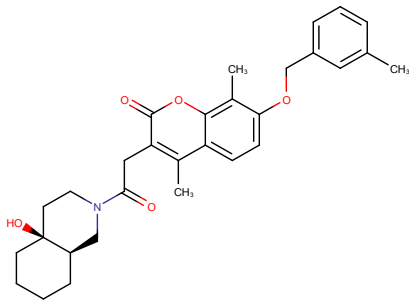   | 6.6 | 6.6 | 6.6 |
| 589 | MolPort-028-855-419 |    | 6.6 | 6.6 | 6.6 |
| 590 | ZINC02124948        |  | 6.6 | 6.6 | 6.6 |
| 591 | ZINC04252491        |  | 6.6 | 6.6 | 6.6 |
| 592 | MolPort-002-151-076 |  | 6.5 | 6.7 | 6.6 |

|     |              |                                                                                     |     |     |     |
|-----|--------------|-------------------------------------------------------------------------------------|-----|-----|-----|
| 593 | ZINC05389044 | 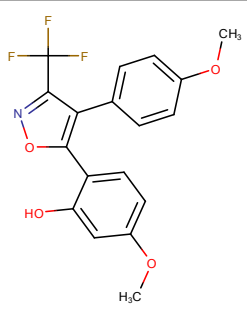   | 6.5 | 6.7 | 6.6 |
| 594 | ZINC02159827 |   | 6.5 | 6.7 | 6.6 |
| 595 | ZINC02093059 |  | 6.5 | 6.7 | 6.6 |
| 596 | ZINC04046749 |  | 6.5 | 6.7 | 6.6 |
| 597 | SN00050294   |  | 6.5 | 6.7 | 6.6 |

|     |              |                                                                                     |     |     |     |
|-----|--------------|-------------------------------------------------------------------------------------|-----|-----|-----|
| 598 | SN00348754   | 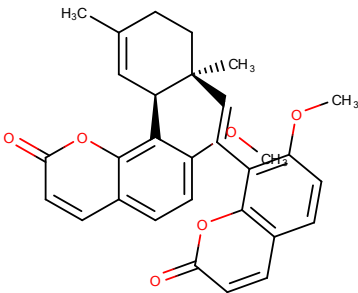   | 6.5 | 6.7 | 6.6 |
| 599 | ZINC02122508 |   | 6.5 | 6.7 | 6.6 |
| 600 | SN00151021   |  | 6.5 | 6.7 | 6.6 |
| 601 | ZINC20762168 |  | 6.4 | 6.8 | 6.6 |
| 602 | ZINC79189259 |  | 6.4 | 6.8 | 6.6 |

|     |                     |                                                                                      |     |     |     |
|-----|---------------------|--------------------------------------------------------------------------------------|-----|-----|-----|
| 603 | ZINC02094763        | 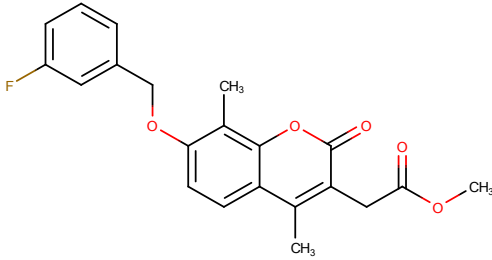   | 6.4 | 6.8 | 6.6 |
| 604 | ZINC02148915        |    | 6.4 | 6.8 | 6.6 |
| 605 | ZINC02133746        |    | 6.4 | 6.8 | 6.6 |
| 606 | ZINC03846610        |  | 6.4 | 6.8 | 6.6 |
| 607 | MolPort-027-852-780 |   | 6.4 | 6.8 | 6.6 |

|     |                     |                                                                                     |     |     |     |
|-----|---------------------|-------------------------------------------------------------------------------------|-----|-----|-----|
| 608 | ZINC01444304        | 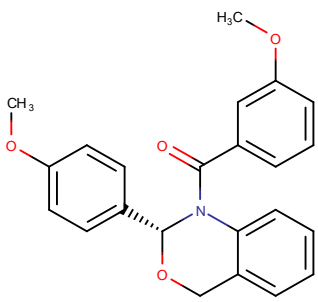   | 6.4 | 6.8 | 6.6 |
| 609 | ZINC02333037        |    | 6.4 | 6.8 | 6.6 |
| 610 | ZINC14492226        |   | 6.3 | 6.9 | 6.6 |
| 611 | ZINC02118316        |  | 6.3 | 6.9 | 6.6 |
| 612 | MolPort-028-856-432 |  | 6.3 | 6.9 | 6.6 |

|     |              |                                                                                      |     |     |     |
|-----|--------------|--------------------------------------------------------------------------------------|-----|-----|-----|
| 613 | ZINC02092152 | 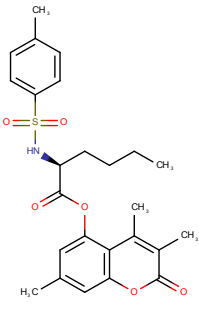    | 6.3 | 6.9 | 6.6 |
| 614 | SN00084180   |     | 6.3 | 6.9 | 6.6 |
| 615 | SN00077068   |    | 6.2 | 7   | 6.6 |
| 616 | ZINC02277837 |  | 6.2 | 7   | 6.6 |
| 617 | ZINC68591828 |   | 6.2 | 7   | 6.6 |



|     |              |                                                                                      |     |     |      |
|-----|--------------|--------------------------------------------------------------------------------------|-----|-----|------|
| 618 | ZINC38143767 | 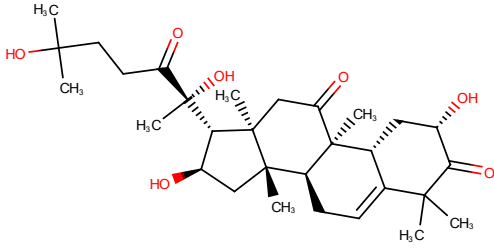   | 6.7 | 6.4 | 6.55 |
| 619 | SN00048103   |     | 6.4 | 6.7 | 6.55 |
| 620 | 20512        |   | 6.4 | 6.7 | 6.55 |
| 621 | ZINC02094396 |  | 6.4 | 6.7 | 6.55 |
| 622 | ZINC02148668 |  | 6.4 | 6.7 | 6.55 |

|     |              |                                                                                     |     |     |      |
|-----|--------------|-------------------------------------------------------------------------------------|-----|-----|------|
| 623 | ZINC02147761 | 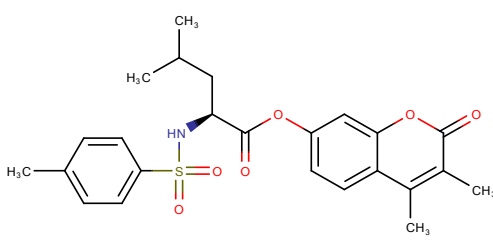  | 6.4 | 6.7 | 6.55 |
| 624 | ZINC02109980 |    | 6.4 | 6.7 | 6.55 |
| 625 | ZINC02666276 |   | 6.4 | 6.7 | 6.55 |
| 626 | 10245-81-5   |  | 6.4 | 6.7 | 6.55 |
| 627 | SN00267570   |  | 6.4 | 6.7 | 6.55 |

|     |                     |                                                                                      |     |     |      |
|-----|---------------------|--------------------------------------------------------------------------------------|-----|-----|------|
| 628 | ZINC12530252        | 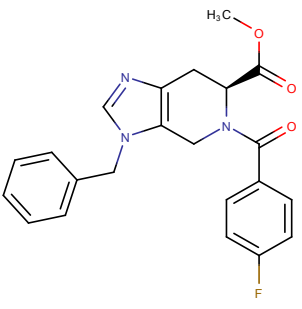    | 6.6 | 6.5 | 6.55 |
| 629 | MolPort-002-527-363 |     | 6.6 | 6.5 | 6.55 |
| 630 | 115982-21-3         |    | 6.6 | 6.5 | 6.55 |
| 631 | 115982-20-2         |   | 6.6 | 6.5 | 6.55 |
| 632 | MolPort-008-347-150 |  | 6.5 | 6.6 | 6.55 |

|     |                     |                                                                                      |     |     |      |
|-----|---------------------|--------------------------------------------------------------------------------------|-----|-----|------|
| 633 | ZINC48057066        | 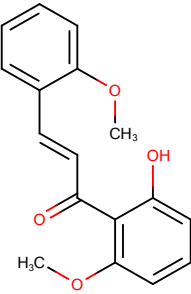    | 6.5 | 6.6 | 6.55 |
| 634 | 7138                |     | 6.5 | 6.6 | 6.55 |
| 635 | 12504               |   | 6.5 | 6.6 | 6.55 |
| 636 | ZINC20466733        |  | 6.5 | 6.6 | 6.55 |
| 637 | MolPort-002-525-564 |   | 6.5 | 6.6 | 6.55 |

|     |                     |                                                                                      |     |     |      |
|-----|---------------------|--------------------------------------------------------------------------------------|-----|-----|------|
| 638 | ZINC02148701        | 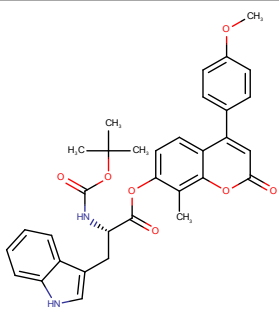    | 6.5 | 6.6 | 6.55 |
| 639 | MolPort-001-683-717 |     | 6.3 | 6.8 | 6.55 |
| 640 | MolPort-009-649-155 |    | 6.3 | 6.8 | 6.55 |
| 641 | ZINC02124986        |  | 6.3 | 6.8 | 6.55 |
| 642 | MolPort-002-520-410 |  | 6.1 | 7   | 6.55 |

|     |                     |                                                                                      |     |     |     |
|-----|---------------------|--------------------------------------------------------------------------------------|-----|-----|-----|
| 643 | ZINC02423589        | 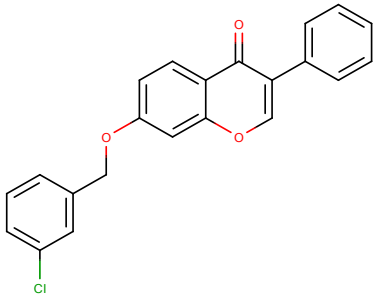    | 6.6 | 6.4 | 6.5 |
| 644 | ZINC20467109        |     | 6.5 | 6.5 | 6.5 |
| 645 | MolPort-042-647-992 |   | 6.5 | 6.5 | 6.5 |
| 646 | ZINC02424621        |   | 6.5 | 6.5 | 6.5 |
| 647 | ZINC11865561        |  | 6.4 | 6.6 | 6.5 |

|     |                     |                                                                                      |     |     |     |
|-----|---------------------|--------------------------------------------------------------------------------------|-----|-----|-----|
| 648 | ZINC09233757        | 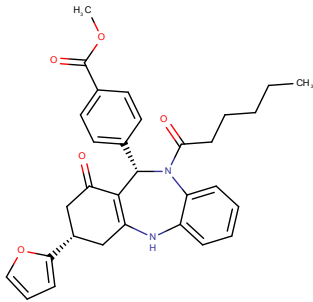    | 6.4 | 6.6 | 6.5 |
| 649 | ZINC02091929        |     | 6.4 | 6.6 | 6.5 |
| 650 | ZINC13727702        |    | 6.3 | 6.7 | 6.5 |
| 651 | MolPort-002-518-545 |  | 6.3 | 6.7 | 6.5 |
| 652 | SN00396633          |  | 6.3 | 6.7 | 6.5 |

|     |                     |                                                                                      |     |     |     |
|-----|---------------------|--------------------------------------------------------------------------------------|-----|-----|-----|
| 653 | ZINC02148113        | 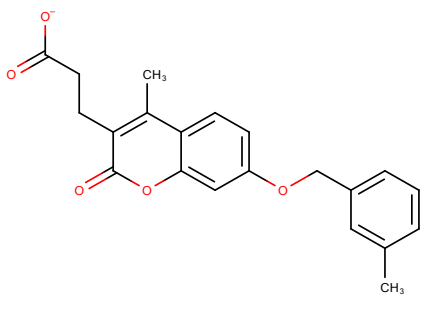   | 6.3 | 6.7 | 6.5 |
| 654 | ZINC02116736        |    | 6.3 | 6.7 | 6.5 |
| 655 | ZINC68569482        |   | 6.3 | 6.7 | 6.5 |
| 656 | SN00077982          |   | 6.2 | 6.8 | 6.5 |
| 657 | MolPort-028-854-753 |  | 6.2 | 6.8 | 6.5 |



|     |              |                                                                                      |     |     |      |
|-----|--------------|--------------------------------------------------------------------------------------|-----|-----|------|
| 658 | ZINC00480646 | 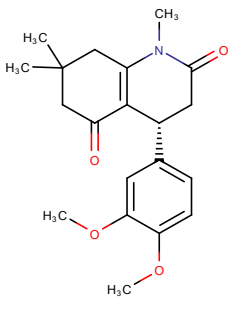    | 6.2 | 6.8 | 6.5  |
| 659 | ZINC11866575 |     | 6.1 | 6.9 | 6.5  |
| 660 | 3037         |    | 6.1 | 6.9 | 6.5  |
| 661 | ZINC04046044 |  | 6.1 | 6.9 | 6.5  |
| 662 | ZINC02148012 |  | 6.5 | 6.4 | 6.45 |

|     |              |                                                                                     |     |     |      |
|-----|--------------|-------------------------------------------------------------------------------------|-----|-----|------|
| 663 | ZINC09357294 | 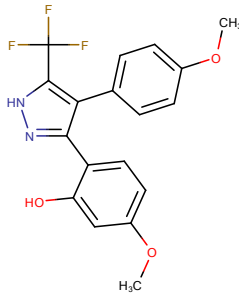   | 6.4 | 6.5 | 6.45 |
| 664 | SN00092731   |   | 6.4 | 6.5 | 6.45 |
| 665 | ZINC04222564 |   | 6.4 | 6.5 | 6.45 |
| 666 | SN00107363   |  | 6.4 | 6.5 | 6.45 |
| 667 | ZINC02151928 |  | 6.4 | 6.5 | 6.45 |

|     |                     |  |     |     |      |
|-----|---------------------|--|-----|-----|------|
| 668 | MolPort-044-180-902 |  | 6.2 | 6.7 | 6.45 |
| 669 | SN00080681          |  | 6.2 | 6.7 | 6.45 |
| 670 | ZINC02120791        |  | 6.2 | 6.7 | 6.45 |
| 671 | SN00376520          |  | 6.2 | 6.7 | 6.45 |
| 672 | SN00333183          |  | 6.2 | 6.7 | 6.45 |

|     |                     |                                                                                      |     |     |      |
|-----|---------------------|--------------------------------------------------------------------------------------|-----|-----|------|
| 673 | 189083-78-1         | 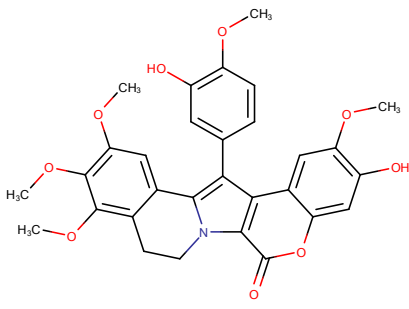    | 6.2 | 6.7 | 6.45 |
| 674 | ZINC02152224        |     | 6.2 | 6.7 | 6.45 |
| 675 | SN00294537          |    | 6.2 | 6.7 | 6.45 |
| 676 | ZINC02092882        |  | 6.2 | 6.7 | 6.45 |
| 677 | MolPort-044-543-486 |  | 6   | 6.9 | 6.45 |

|     |              |                                                                                      |     |     |      |
|-----|--------------|--------------------------------------------------------------------------------------|-----|-----|------|
| 678 | ZINC02148765 | 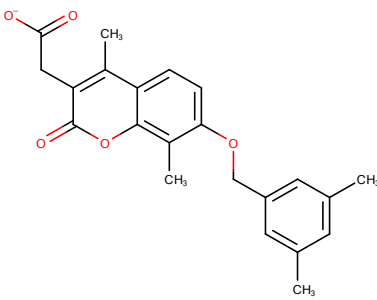    | 5.9 | 7   | 6.45 |
| 679 | SN00333183   |    | 6.3 | 6.6 | 6.45 |
| 680 | ZINC06058691 |    | 6.3 | 6.6 | 6.45 |
| 681 | ZINC68575391 |   | 6.3 | 6.6 | 6.45 |
| 682 | ZINC06075836 |  | 6.3 | 6.6 | 6.45 |

|     |                     |                                                                                      |     |     |      |
|-----|---------------------|--------------------------------------------------------------------------------------|-----|-----|------|
| 683 | SN00366689          | 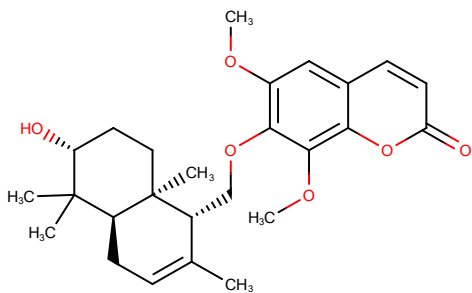   | 6.3 | 6.6 | 6.45 |
| 684 | ZINC02095090        |    | 6.3 | 6.6 | 6.45 |
| 685 | MolPort-027-718-092 |   | 6.3 | 6.6 | 6.45 |
| 686 | ZINC30882130        |   | 6.1 | 6.8 | 6.45 |
| 687 | ZINC20466245        |  | 6.5 | 6.3 | 6.4  |

|     |                     |  |     |     |     |
|-----|---------------------|--|-----|-----|-----|
| 688 | ZINC02125435        |  | 6.4 | 6.4 | 6.4 |
| 689 | ZINC02227306        |  | 6.4 | 6.4 | 6.4 |
| 690 | MolPort-038-386-398 |  | 6.4 | 6.4 | 6.4 |
| 691 | MolPort-028-855-303 |  | 6.4 | 6.4 | 6.4 |
| 692 | MolPort-002-513-842 |  | 6.3 | 6.5 | 6.4 |

|     |                     |                                                                                     |     |     |     |
|-----|---------------------|-------------------------------------------------------------------------------------|-----|-----|-----|
| 693 | MolPort-000-847-367 | 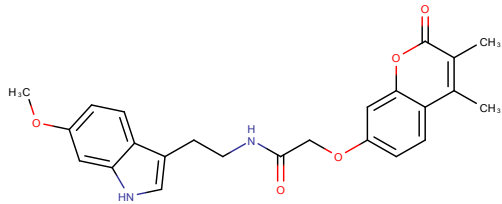  | 6.3 | 6.5 | 6.4 |
| 694 | MolPort-001-573-006 |    | 6.3 | 6.5 | 6.4 |
| 695 | MolPort-028-855-404 |   | 6.2 | 6.6 | 6.4 |
| 696 | ZINC04236557        |  | 6.2 | 6.6 | 6.4 |
| 697 | ZINC20761201        |  | 6.2 | 6.6 | 6.4 |



|     |              |                                                                                      |     |     |     |
|-----|--------------|--------------------------------------------------------------------------------------|-----|-----|-----|
| 698 | 62008-00-8   | 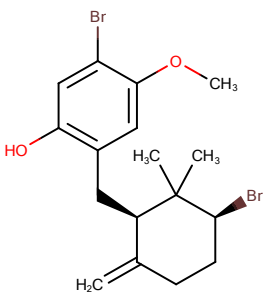    | 6.2 | 6.6 | 6.4 |
| 699 | ZINC01902806 |     | 6.2 | 6.6 | 6.4 |
| 700 | ZINC35466060 |    | 6.1 | 6.7 | 6.4 |
| 701 | SN00074324   |   | 6.1 | 6.7 | 6.4 |
| 702 | ZINC30880470 |  | 6.1 | 6.7 | 6.4 |

|     |                     |                                                                                      |     |     |      |
|-----|---------------------|--------------------------------------------------------------------------------------|-----|-----|------|
| 703 | SN00092731          | 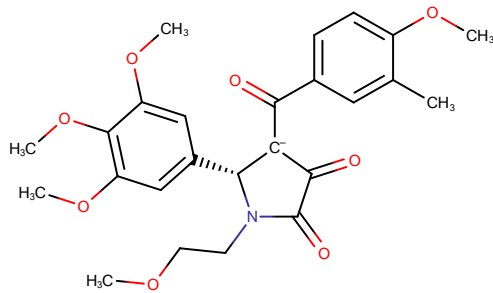   | 6   | 6.8 | 6.4  |
| 704 | ZINC02093739        |    | 6   | 6.8 | 6.4  |
| 705 | ZINC03999825        |    | 5.9 | 6.9 | 6.4  |
| 706 | MolPort-000-797-746 |   | 5.9 | 6.9 | 6.4  |
| 707 | ZINC72325705        |  | 6.5 | 6.2 | 6.35 |

|     |                     |                                                                                     |     |     |      |
|-----|---------------------|-------------------------------------------------------------------------------------|-----|-----|------|
| 708 | ZINC02345008        | 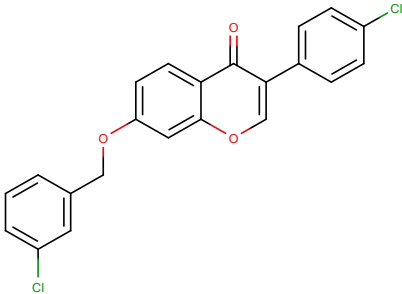   | 6.5 | 6.2 | 6.35 |
| 709 | SN00372645          |    | 6.3 | 6.4 | 6.35 |
| 710 | ZINC06624183        |  | 6.3 | 6.4 | 6.35 |
| 711 | SN00102958          |  | 6.3 | 6.4 | 6.35 |
| 712 | MolPort-001-737-182 |  | 6.2 | 6.5 | 6.35 |

|     |              |                                                                                     |     |     |      |
|-----|--------------|-------------------------------------------------------------------------------------|-----|-----|------|
| 713 | 169181-25-3  | 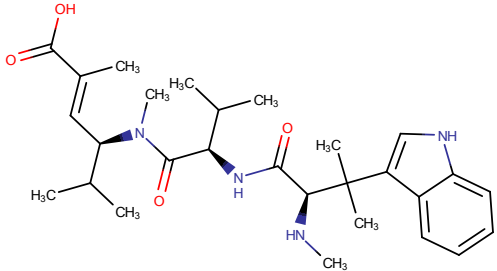  | 6.2 | 6.5 | 6.35 |
| 714 | SN00295762   |   | 6.2 | 6.5 | 6.35 |
| 715 | SN00379562   |  | 6.2 | 6.5 | 6.35 |
| 716 | ZINC20611253 |  | 6   | 6.7 | 6.35 |
| 717 | SN00282943   |  | 6.4 | 6.2 | 6.3  |

|     |                     |                                                                                     |     |     |     |
|-----|---------------------|-------------------------------------------------------------------------------------|-----|-----|-----|
| 718 | ZINC12896984        | 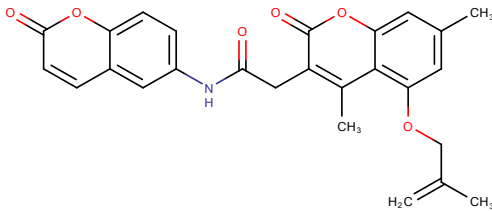  | 6.2 | 6.4 | 6.3 |
| 719 | ZINC38139997        |    | 6.2 | 6.4 | 6.3 |
| 720 | SN00083504          |   | 6.2 | 6.4 | 6.3 |
| 721 | ZINC02145888        |  | 6.2 | 6.4 | 6.3 |
| 722 | MolPort-009-649-148 |  | 6.2 | 6.4 | 6.3 |

|     |              |                                                                                      |     |     |     |
|-----|--------------|--------------------------------------------------------------------------------------|-----|-----|-----|
| 723 | SN00138838   | 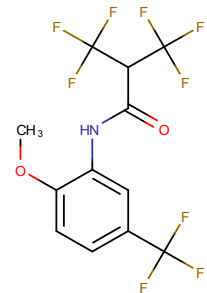    | 6.2 | 6.4 | 6.3 |
| 724 | ZINC68575413 |     | 6.2 | 6.4 | 6.3 |
| 725 | ZINC04273464 |   | 6.2 | 6.4 | 6.3 |
| 726 | ZINC02151831 |   | 5.9 | 6.7 | 6.3 |
| 727 | ZINC11865226 |  | 6.5 | 6.1 | 6.3 |

|     |                     |                                                                                      |     |     |     |
|-----|---------------------|--------------------------------------------------------------------------------------|-----|-----|-----|
| 728 | SN00061024          | 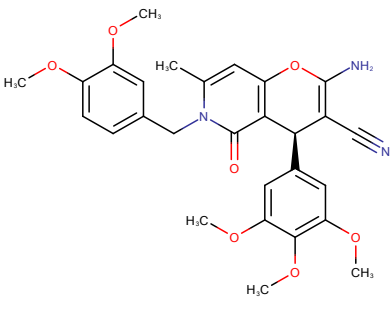    | 6.3 | 6.3 | 6.3 |
| 729 | MolPort-028-855-479 |    | 6.3 | 6.3 | 6.3 |
| 730 | ZINC06075844        |   | 6.3 | 6.3 | 6.3 |
| 731 | ZINC20466733        |  | 6.3 | 6.3 | 6.3 |
| 732 | 23230               |  | 6.1 | 6.5 | 6.3 |

|     |                     |                                                                                     |     |     |     |
|-----|---------------------|-------------------------------------------------------------------------------------|-----|-----|-----|
| 733 | ZINC71386405        | 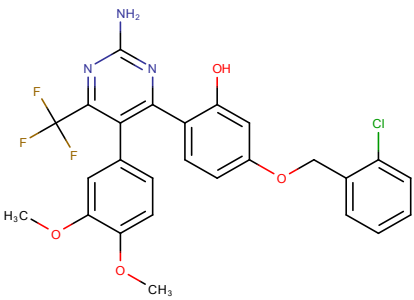  | 6.1 | 6.5 | 6.3 |
| 734 | ZINC48057069        |   | 6.1 | 6.5 | 6.3 |
| 735 | SN00258775          |  | 6.1 | 6.5 | 6.3 |
| 736 | ZINC02092390        |  | 6.1 | 6.5 | 6.3 |
| 737 | MolPort-009-649-144 |  | 6   | 6.6 | 6.3 |



|     |                     |                                                                                      |     |     |      |
|-----|---------------------|--------------------------------------------------------------------------------------|-----|-----|------|
| 738 | SN00073804          | 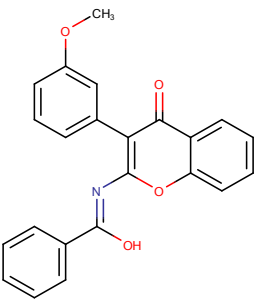    | 6   | 6.6 | 6.3  |
| 739 | SN00083510          |     | 6   | 6.6 | 6.3  |
| 740 | ZINC02114015        |   | 5.8 | 6.8 | 6.3  |
| 741 | ZINC11865162        |  | 6.4 | 6.1 | 6.25 |
| 742 | MolPort-002-525-974 |  | 6.2 | 6.3 | 6.25 |

|     |                     |                                                                                      |     |     |      |
|-----|---------------------|--------------------------------------------------------------------------------------|-----|-----|------|
| 743 | ZINC02096348        | 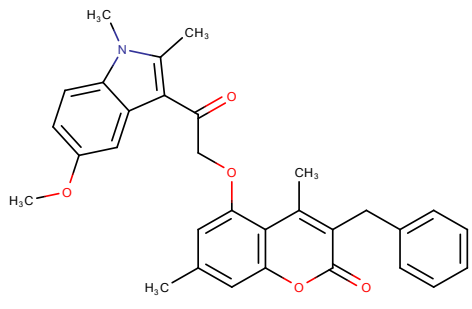   | 6.2 | 6.3 | 6.25 |
| 744 | MolPort-005-950-564 |    | 6.2 | 6.3 | 6.25 |
| 745 | ZINC79189935        |    | 6.2 | 6.3 | 6.25 |
| 746 | MolPort-001-745-897 |  | 6.1 | 6.4 | 6.25 |
| 747 | ZINC17198153        |   | 6.1 | 6.4 | 6.25 |

|     |                     |                                                                                     |     |     |      |
|-----|---------------------|-------------------------------------------------------------------------------------|-----|-----|------|
| 748 | MolPort-039-195-378 | 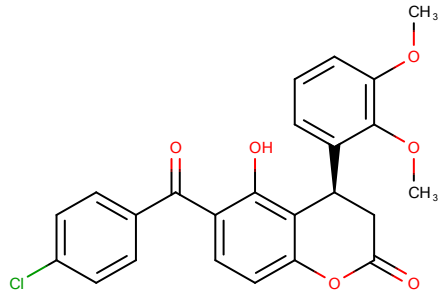  | 6.1 | 6.4 | 6.25 |
| 749 | ZINC20467354        |   | 6.1 | 6.4 | 6.25 |
| 750 | SN00053349          |   | 6.1 | 6.4 | 6.25 |
| 751 | ZINC49543301        |  | 6   | 6.5 | 6.25 |
| 752 | ZINC02095669        |  | 6   | 6.5 | 6.25 |

|     |                     |                                                                                      |   |     |      |
|-----|---------------------|--------------------------------------------------------------------------------------|---|-----|------|
| 753 | 143682-18-2         | 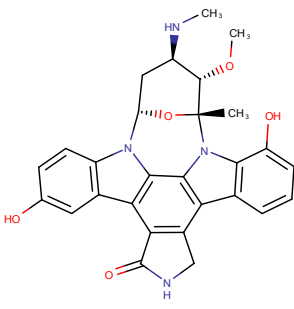    | 6 | 6.5 | 6.25 |
| 754 | 129623-30-9         |     | 6 | 6.5 | 6.25 |
| 755 | MolPort-007-564-138 |    | 6 | 6.5 | 6.25 |
| 756 | ZINC04046667        |  | 6 | 6.5 | 6.25 |
| 757 | ZINC72324754        |   | 6 | 6.5 | 6.25 |

|     |                     |                                                                                      |     |     |      |
|-----|---------------------|--------------------------------------------------------------------------------------|-----|-----|------|
| 758 | MolPort-005-910-869 | 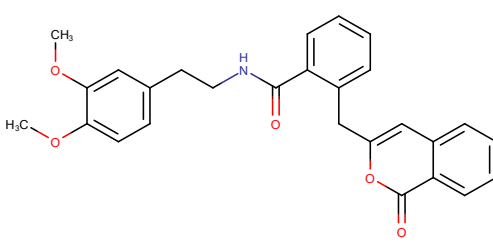   | 5.9 | 6.6 | 6.25 |
| 759 | MolPort-008-348-717 |     | 5.9 | 6.6 | 6.25 |
| 760 | SN00077983          |    | 5.9 | 6.6 | 6.25 |
| 761 | ZINC04062053        |  | 5.9 | 6.6 | 6.25 |
| 762 | MolPort-000-813-035 |  | 5.8 | 6.7 | 6.25 |

|     |                     |                                                                                     |     |     |     |
|-----|---------------------|-------------------------------------------------------------------------------------|-----|-----|-----|
| 763 | ZINC11865225        | 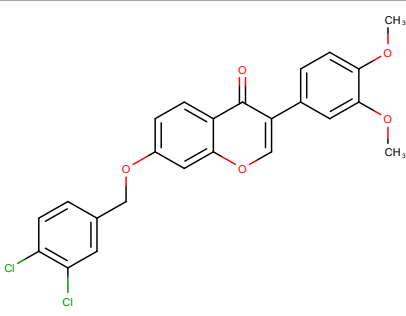   | 6.4 | 6   | 6.2 |
| 764 | MolPort-039-194-841 |    | 6.2 | 6.2 | 6.2 |
| 765 | MolPort-044-810-910 |   | 6.2 | 6.2 | 6.2 |
| 766 | SN00161478          |  | 6.2 | 6.2 | 6.2 |
| 767 | ZINC08918194        |  | 6.2 | 6.2 | 6.2 |

|     |                     |                                                                                     |   |     |     |
|-----|---------------------|-------------------------------------------------------------------------------------|---|-----|-----|
| 768 | ZINC05817910        | 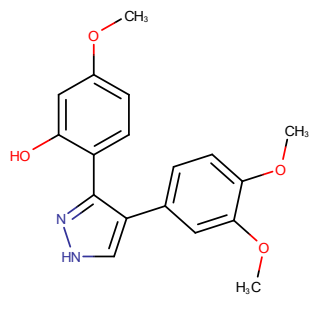   | 6 | 6.4 | 6.2 |
| 769 | ZINC12899640        |   | 6 | 6.4 | 6.2 |
| 770 | ZINC38549848        |  | 6 | 6.4 | 6.2 |
| 771 | ZINC02119925        |  | 6 | 6.4 | 6.2 |
| 772 | MolPort-009-649-155 |  | 6 | 6.4 | 6.2 |

|     |                     |                                                                                      |     |     |     |
|-----|---------------------|--------------------------------------------------------------------------------------|-----|-----|-----|
| 773 | MolPort-002-524-289 | 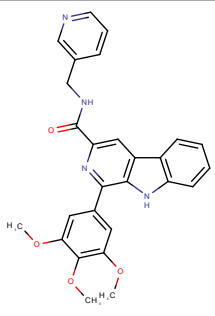    | 6   | 6.4 | 6.2 |
| 774 | ZINC49543327        |     | 5.7 | 6.7 | 6.2 |
| 775 | 155233-31-1         |    | 6.3 | 6.1 | 6.2 |
| 776 | 181423-71-2         |  | 6.3 | 6.1 | 6.2 |
| 777 | ZINC04046180        |  | 6.1 | 6.3 | 6.2 |



|     |                     |                                                                                     |     |     |      |
|-----|---------------------|-------------------------------------------------------------------------------------|-----|-----|------|
| 778 | MolPort-028-856-366 | 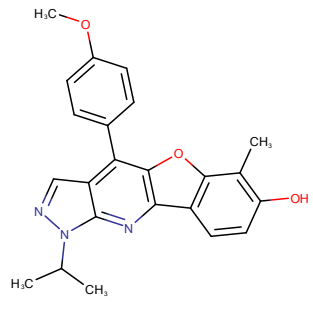   | 6.1 | 6.3 | 6.2  |
| 779 | MolPort-007-902-409 |    | 6.1 | 6.3 | 6.2  |
| 780 | ZINC02120633        |  | 5.8 | 6.6 | 6.2  |
| 781 | 12190               |  | 6.3 | 6   | 6.15 |
| 782 | 99457-91-7          |  | 6.2 | 6.1 | 6.15 |

|     |                     |                                                                                      |     |     |      |
|-----|---------------------|--------------------------------------------------------------------------------------|-----|-----|------|
| 783 | ZINC04089321        | 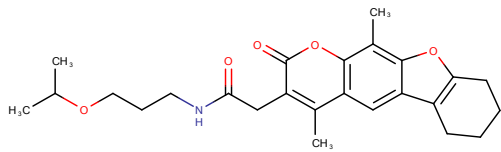   | 6.1 | 6.2 | 6.15 |
| 784 | ZINC02149278        |     | 6.1 | 6.2 | 6.15 |
| 785 | ZINC30881458        |    | 6   | 6.3 | 6.15 |
| 786 | MolPort-019-936-025 |   | 5.9 | 6.4 | 6.15 |
| 787 | ZINC02104075        |  | 5.8 | 6.5 | 6.15 |

|     |                     |                                                                                      |     |     |      |
|-----|---------------------|--------------------------------------------------------------------------------------|-----|-----|------|
| 788 | MolPort-002-533-189 | 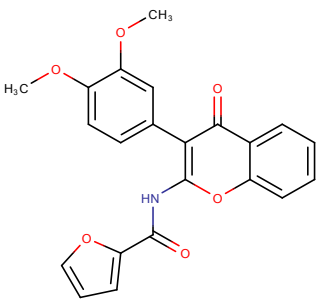    | 5.7 | 6.6 | 6.15 |
| 789 | ZINC02092427        |    | 5.7 | 6.6 | 6.15 |
| 790 | MolPort-028-854-697 |    | 6.2 | 6   | 6.1  |
| 791 | ZINC19927379        |  | 6.1 | 6.1 | 6.1  |
| 792 | SN00060965          |  | 6.1 | 6.1 | 6.1  |

|     |                     |                                                                                      |     |     |     |
|-----|---------------------|--------------------------------------------------------------------------------------|-----|-----|-----|
| 793 | SN00062839          | 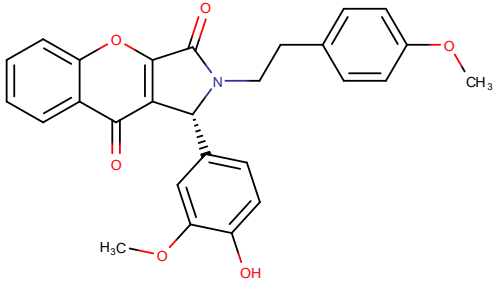   | 6   | 6.2 | 6.1 |
| 794 | ZINC12875599        |     | 6   | 6.2 | 6.1 |
| 795 | MolPort-028-856-471 |   | 6   | 6.2 | 6.1 |
| 796 | ZINC08791756        |  | 6   | 6.2 | 6.1 |
| 797 | MolPort-009-649-145 |   | 5.9 | 6.3 | 6.1 |

|     |                     |                                                                                      |     |     |     |
|-----|---------------------|--------------------------------------------------------------------------------------|-----|-----|-----|
| 798 | SN00073864          | 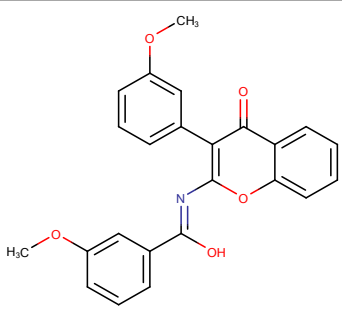    | 5.9 | 6.3 | 6.1 |
| 799 | MolPort-002-087-773 |     | 5.9 | 6.3 | 6.1 |
| 800 | ZINC03846616        |   | 5.8 | 6.4 | 6.1 |
| 801 | MolPort-035-873-330 |  | 5.8 | 6.4 | 6.1 |
| 802 | MolPort-009-649-145 |   | 5.8 | 6.4 | 6.1 |

|     |                     |                                                                                      |     |     |     |
|-----|---------------------|--------------------------------------------------------------------------------------|-----|-----|-----|
| 803 | MolPort-035-702-025 | 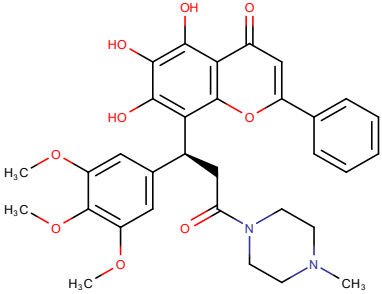    | 5.7 | 6.5 | 6.1 |
| 804 | MolPort-005-950-438 |    | 5.7 | 6.5 | 6.1 |
| 805 | MolPort-002-533-108 |    | 5.6 | 6.6 | 6.1 |
| 806 | MolPort-002-529-261 |  | 5.6 | 6.6 | 6.1 |
| 807 | ZINC02148665        |  | 5.5 | 6.7 | 6.1 |

|     |                     |                                                                                     |     |     |      |
|-----|---------------------|-------------------------------------------------------------------------------------|-----|-----|------|
| 808 | ZINC30881020        | 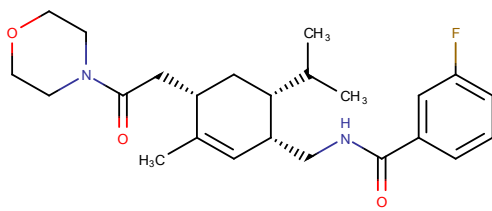  | 6.2 | 5.9 | 6.05 |
| 809 | ZINC02095349        |    | 5.9 | 6.2 | 6.05 |
| 810 | MolPort-000-814-627 |  | 5.9 | 6.2 | 6.05 |
| 811 | MolPort-039-057-703 |  | 5.9 | 6.2 | 6.05 |
| 812 | MolPort-008-348-717 |  | 5.7 | 6.4 | 6.05 |

|     |                     |                                                                                      |     |     |      |
|-----|---------------------|--------------------------------------------------------------------------------------|-----|-----|------|
| 813 | MolPort-000-792-600 | 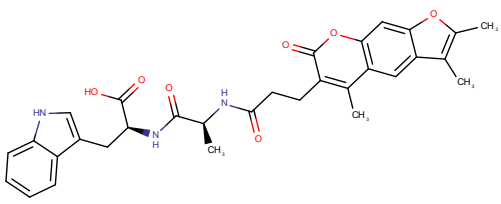   | 5.7 | 6.4 | 6.05 |
| 814 | ZINC04023594        |     | 6.1 | 6   | 6.05 |
| 815 | MolPort-002-518-223 |   | 6   | 6.1 | 6.05 |
| 816 | MolPort-002-523-304 |  | 6   | 6.1 | 6.05 |
| 817 | SN00243902          |  | 6   | 6.1 | 6.05 |



|     |              |                                                                                      |     |     |      |
|-----|--------------|--------------------------------------------------------------------------------------|-----|-----|------|
| 818 | 149378-57-4  | 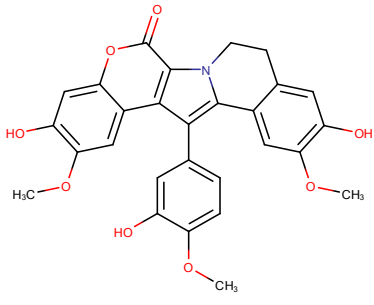    | 6   | 6.1 | 6.05 |
| 819 | ZINC35466060 |     | 5.8 | 6.3 | 6.05 |
| 820 | 9574         |    | 5.8 | 6.3 | 6.05 |
| 821 | ZINC02125058 |  | 6.1 | 5.9 | 6    |
| 822 | ZINC38143767 |  | 6.1 | 5.9 | 6    |

|     |                     |                                                                                      |     |     |   |
|-----|---------------------|--------------------------------------------------------------------------------------|-----|-----|---|
| 823 | MolPort-002-518-797 | 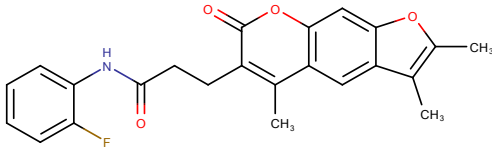   | 5.9 | 6.1 | 6 |
| 824 | ZINC12899873        |    | 5.9 | 6.1 | 6 |
| 825 | SN00344408          |    | 5.9 | 6.1 | 6 |
| 826 | ZINC06167362        |  | 5.8 | 6.2 | 6 |
| 827 | SN00335313          |  | 5.7 | 6.3 | 6 |

|     |                     |                                                                                      |     |     |      |
|-----|---------------------|--------------------------------------------------------------------------------------|-----|-----|------|
| 828 | 152273-84-2         | 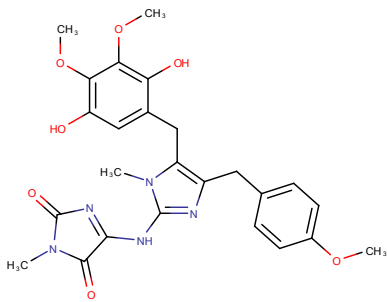    | 5.7 | 6.3 | 6    |
| 829 | ZINC02123590        |    | 5.5 | 6.5 | 6    |
| 830 | MolPort-002-518-554 |   | 5.9 | 6   | 5.95 |
| 831 | MolPort-038-386-405 |   | 5.9 | 6   | 5.95 |
| 832 | ZINC02095346        |  | 5.9 | 6   | 5.95 |

|     |                     |                                                                                      |     |     |      |
|-----|---------------------|--------------------------------------------------------------------------------------|-----|-----|------|
| 833 | ZINC02667597        | 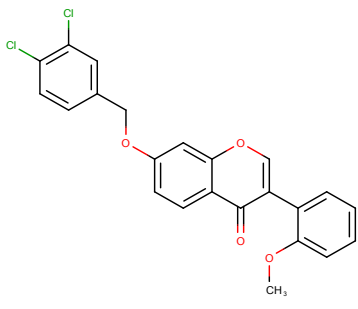    | 5.9 | 6   | 5.95 |
| 834 | ZINC17146927        |     | 5.7 | 6.2 | 5.95 |
| 835 | ZINC02157897        |   | 5.5 | 6.4 | 5.95 |
| 836 | MolPort-039-194-689 |  | 5.5 | 6.4 | 5.95 |
| 837 | ZINC08790722        |  | 5.5 | 6.4 | 5.95 |

|     |                     |                                                                                     |     |     |      |
|-----|---------------------|-------------------------------------------------------------------------------------|-----|-----|------|
| 838 | ZINC02117069        | 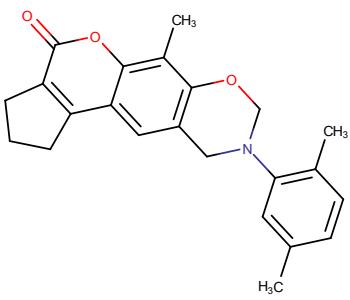   | 5.8 | 6.1 | 5.95 |
| 839 | ZINC02125535        |    | 5.8 | 6.1 | 5.95 |
| 840 | ZINC79192837        |   | 5.8 | 6.1 | 5.95 |
| 841 | MolPort-009-649-144 |  | 5.6 | 6.3 | 5.95 |
| 842 | SN00051121          |  | 6   | 5.8 | 5.9  |

|     |                     |                                                                                      |     |     |     |
|-----|---------------------|--------------------------------------------------------------------------------------|-----|-----|-----|
| 843 | ZINC31168056        | 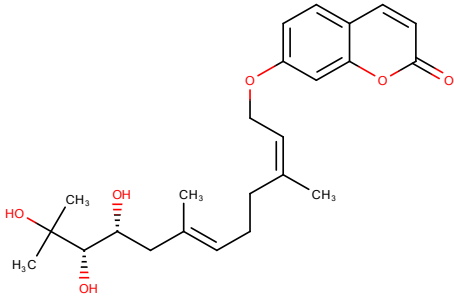   | 5.8 | 6   | 5.9 |
| 844 | MolPort-039-194-968 |    | 5.7 | 6.1 | 5.9 |
| 845 | ZINC12296372        |    | 5.7 | 6.1 | 5.9 |
| 846 | ZINC02123120        |  | 5.7 | 6.1 | 5.9 |
| 847 | ZINC68589300        |  | 5.6 | 6.2 | 5.9 |

|     |                     |                                                                                     |     |     |      |
|-----|---------------------|-------------------------------------------------------------------------------------|-----|-----|------|
| 848 | SN00102579          | 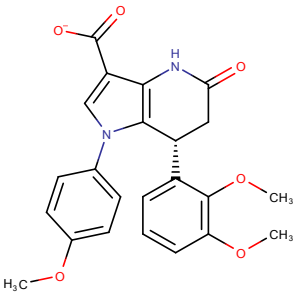   | 5.5 | 6.3 | 5.9  |
| 849 | SN00305462          |    | 5.4 | 6.4 | 5.9  |
| 850 | MolPort-007-733-445 |   | 5.9 | 5.8 | 5.85 |
| 851 | 17917               |  | 5.8 | 5.9 | 5.85 |
| 852 | MolPort-001-999-765 |  | 5.8 | 5.9 | 5.85 |

|     |                     |                                                                                     |     |     |      |
|-----|---------------------|-------------------------------------------------------------------------------------|-----|-----|------|
| 853 | SN00103065          | 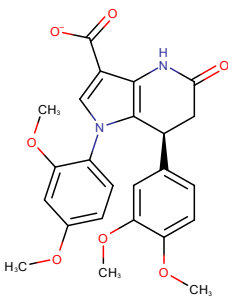   | 5.7 | 6   | 5.85 |
| 854 | ZINC38143767        |   | 5.7 | 6   | 5.85 |
| 855 | SN00254960          |   | 5.7 | 6   | 5.85 |
| 856 | SN00103017          |  | 5.6 | 6.1 | 5.85 |
| 857 | MolPort-044-810-666 |  | 5.5 | 6.2 | 5.85 |



|     |                     |                                                                                     |     |     |     |
|-----|---------------------|-------------------------------------------------------------------------------------|-----|-----|-----|
| 858 | MolPort-042-674-422 | 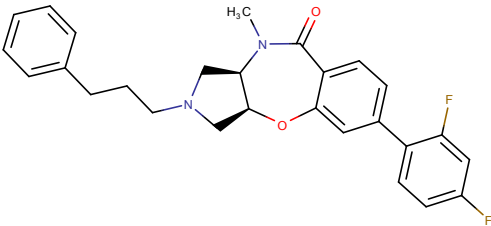  | 5.9 | 5.7 | 5.8 |
| 859 | MolPort-007-787-617 |    | 5.7 | 5.9 | 5.8 |
| 860 | ZINC30883812        |  | 5.7 | 5.9 | 5.8 |
| 861 | MolPort-044-544-159 |  | 5.4 | 6.2 | 5.8 |
| 862 | MolPort-002-533-223 |  | 5.4 | 6.2 | 5.8 |

|     |                     |                                                                                      |     |     |     |
|-----|---------------------|--------------------------------------------------------------------------------------|-----|-----|-----|
| 863 | ZINC05783367        | 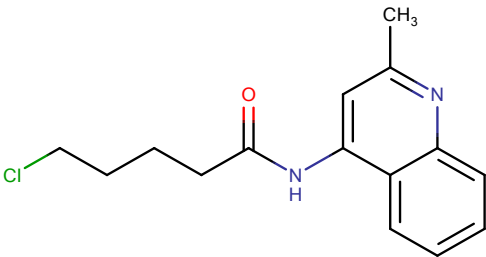   | 5.6 | 6   | 5.8 |
| 864 | MolPort-002-184-761 |     | 5.6 | 6   | 5.8 |
| 865 | ZINC02095836        |   | 5.6 | 6   | 5.8 |
| 866 | MolPort-001-683-688 |   | 5.6 | 6   | 5.8 |
| 867 | 200936-84-1         |  | 5.5 | 6.1 | 5.8 |

|     |                     |                                                                                     |     |     |      |
|-----|---------------------|-------------------------------------------------------------------------------------|-----|-----|------|
| 868 | MolPort-001-906-348 | 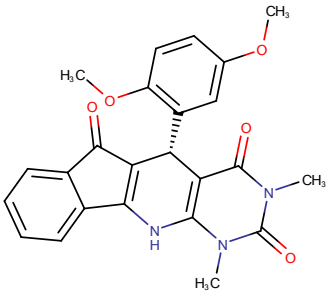   | 5.5 | 6.1 | 5.8  |
| 869 | ZINC02114872        |   | 5.3 | 6.3 | 5.8  |
| 870 | 189083-80-5         |   | 5.5 | 6   | 5.75 |
| 871 | ZINC70687176        |  | 5.4 | 6.1 | 5.75 |
| 872 | SN00061023          |  | 5.4 | 6.1 | 5.75 |

|     |                     |                                                                                     |     |     |     |
|-----|---------------------|-------------------------------------------------------------------------------------|-----|-----|-----|
| 873 | MolPort-008-348-069 | 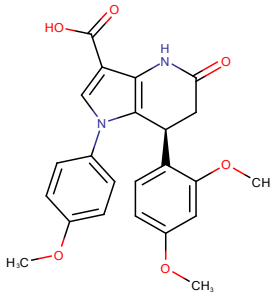   | 5.5 | 5.9 | 5.7 |
| 874 | 19310               |    | 5.2 | 6.2 | 5.7 |
| 875 | MolPort-001-728-081 |  | 5.6 | 5.8 | 5.7 |
| 876 | MolPort-008-348-079 |  | 5.6 | 5.8 | 5.7 |
| 877 | MolPort-044-543-703 |  | 5.3 | 6.1 | 5.7 |

|     |                     |                                                                                     |     |     |      |
|-----|---------------------|-------------------------------------------------------------------------------------|-----|-----|------|
| 878 | MolPort-009-649-107 | 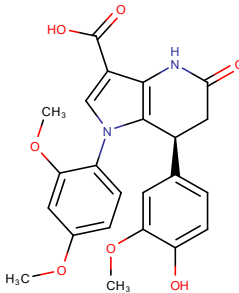   | 5.3 | 6.1 | 5.7  |
| 879 | ZINC70705416        |   | 5.3 | 6.1 | 5.7  |
| 880 | MolPort-001-907-854 |  | 5.3 | 6.1 | 5.7  |
| 881 | ZINC02125325        |  | 5.3 | 6.1 | 5.7  |
| 882 | MolPort-002-277-679 |  | 5.5 | 5.8 | 5.65 |

|     |              |  |     |     |      |
|-----|--------------|--|-----|-----|------|
| 883 | ZINC02115373 |  | 5.3 | 6   | 5.65 |
| 884 | ZINC04046886 |  | 5.2 | 6.1 | 5.65 |
| 885 | ZINC85879780 |  | 5.4 | 5.8 | 5.6  |
| 886 | SN00063749   |  | 4.9 | 6.3 | 5.6  |
| 887 | SN00098390   |  | 5.4 | 5.7 | 5.55 |

|     |                     |                                                                                     |     |     |      |
|-----|---------------------|-------------------------------------------------------------------------------------|-----|-----|------|
| 888 | MolPort-009-649-139 | 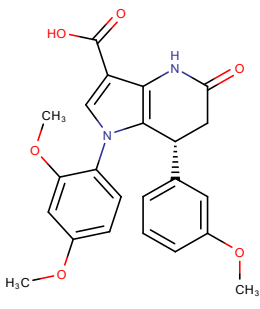   | 5.4 | 5.7 | 5.55 |
| 889 | MolPort-002-510-470 |    | 5.2 | 5.9 | 5.55 |
| 890 | MolPort-005-307-707 |   | 5.2 | 5.9 | 5.55 |
| 891 | MolPort-008-348-309 |  | 5.3 | 5.8 | 5.55 |
| 892 | SN00102409          |  | 5.1 | 6   | 5.55 |

|     |                     |  |     |     |      |
|-----|---------------------|--|-----|-----|------|
| 893 | SN00103067          |  | 5   | 6.1 | 5.55 |
| 894 | ZINC05452024        |  | 5.3 | 5.7 | 5.5  |
| 895 | MolPort-007-796-366 |  | 5.2 | 5.8 | 5.5  |
| 896 | MolPort-001-973-554 |  | 5.1 | 5.8 | 5.45 |
| 897 | SN00102531          |  | 4.9 | 5.9 | 5.4  |



|     |                     |                                                                                      |     |     |      |
|-----|---------------------|--------------------------------------------------------------------------------------|-----|-----|------|
| 898 | MolPort-008-348-587 | 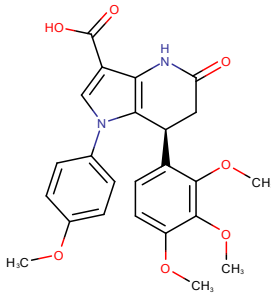    | 5.2 | 5.5 | 5.35 |
| 899 | ZINC06786347        |    | 4.9 | 5.8 | 5.35 |
| 900 | MolPort-035-701-663 |   | 5.1 | 5.5 | 5.3  |
| 901 | MolPort-007-846-702 |  | 5.1 | 5.5 | 5.3  |
| 902 | MolPort-002-524-175 |  | 4.8 | 5.8 | 5.3  |

|     |                     |                                                                                     |     |     |      |
|-----|---------------------|-------------------------------------------------------------------------------------|-----|-----|------|
| 903 | MolPort-002-528-359 | 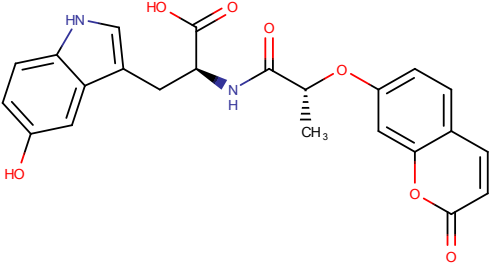  | 4.9 | 5.6 | 5.25 |
| 904 | SN00102042          |    | 4.6 | 5.8 | 5.2  |
| 905 | MolPort-002-571-308 |   | 4.7 | 5.4 | 5.05 |
| 906 | ZINC13409784        |  | 4.5 | 5.2 | 4.85 |
| 907 | SN00102051          |  | 4.2 | 5.5 | 4.85 |

|     |              |                                                                                    |     |     |      |
|-----|--------------|------------------------------------------------------------------------------------|-----|-----|------|
| 908 | SN00102958   | 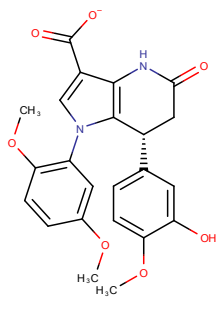  | 4.1 | 5.6 | 4.85 |
| 909 | ZINC20467021 |   | 4.5 | 5   | 4.75 |
| 910 | SN00086102   |  | 4   | 5.3 | 4.65 |

## References

- 1 Pottie, E., Cannaert, A. & Stove, C. P. In vitro structure–activity relationship determination of 30 psychedelic new psychoactive substances by means of  $\beta$ -arrestin 2 recruitment to the serotonin 2A receptor. *Archives of Toxicology* **94**, 3449-3460, doi:10.1007/s00204-020-02836-w (2020).
